# Supplementary material for: Alder-ene reactions driven by high steric strain and bond angle distortion to form benzocyclobutenes
Source: PubMed Central journal article supplement — Chem Sci. 2018 Dec 19;10(7):2212–7. doi: 10.1039/c8sc04277b (PMC6399677; doi:10.1039/c8sc04277b), 2018-12-19
Supplement: SC-010-C8SC04277B-s001.pdf [file SC-010-C8SC04277B-s001.pdf]

## Supporting Information

### Alder–Ene Reactions Driven by High Steric Strain and Bond Angle

#### Distortion to Form Benzocyclobutenes

Saswata Gupta,<sup>†</sup> Yongjia Lin,<sup>‡</sup> Yuanzhi Xia,<sup>\*‡</sup> Donald J. Wink<sup>†</sup> and Daesung Lee<sup>\*†</sup>

<sup>†</sup>*Department of Chemistry, University of Illinois at Chicago*

<sup>‡</sup>*College of Chemistry and Materials Engineering, Wenzhou University*

E-mail: [xyz@wzu.edu.cn](mailto:xyz@wzu.edu.cn) (YX)  
[dsunglee@uic.edu](mailto:dsunglee@uic.edu) (DL)

|                                                               |      |
|---------------------------------------------------------------|------|
| Table of Contents                                             | Page |
| Materials and Methods                                         | S2   |
| Experimental Details                                          | S2   |
| Characterization Data                                         | S12  |
| <sup>1</sup> H, <sup>13</sup> C NMRs and Selected nOe Spectra | S25  |
| X-Ray Structure of <b>2o</b>                                  | S94  |
| Computational Data                                            | S95  |

## Materials and Methods

Reactions were carried out in oven-dried glassware unless otherwise noted. Compounds were purchased from Aldrich, Acros, TCI America or Oakwood unless otherwise noted. Toluene, dichloromethane, triethylamine and acetonitrile were distilled over calcium hydride (CaH<sub>2</sub>) under nitrogen. Tetrahydrofuran was dried over sodiumbenzophenone ketyl. Column chromatography was performed using silica gel 60 Å (32–63 mesh) purchased from Silicycle Inc. Analytical thin layer chromatography (TLC) was performed on 0.25 mm E. Merck precoated silica gel 60 (particle size 0.040–0.063 mm). Yields refer to chromatographically and spectroscopically pure isolated compounds unless otherwise stated. <sup>1</sup>H NMR and <sup>13</sup>C NMR spectra were recorded on a Bruker AV-500 spectrometer. <sup>1</sup>H NMR chemical shifts (δ) are reported in parts per million (ppm) downfield of TMS and are referenced relative to the residual proteated solvent peak (CDCl<sub>3</sub> (7.26 ppm)). <sup>13</sup>C chemical shifts (δ) are reported in parts per million downfield of TMS and are referenced to the carbon resonance of the solvent (CDCl<sub>3</sub> (77.2 ppm)). Multiplicities are indicated by s (singlet), d (doublet), t (triplet), q (quartet), quin (quintet), sext (sextet) or m (multiplet). <sup>1</sup>H NMR signals that fall within a ca. 0.3 ppm range are generally reported as a multiplet, with a range of chemical shift values corresponding to the peak or center of the peak. Coupling constants, *J*, are reported in Hz (Hertz). Electrospray ionization (ESI) and Electron impact (EI) mass spectra were recorded on a Waters Micromass Q-ToF Ultima and Micromass 70-VSE, respectively in the University of Illinois at Urbana-Champaign.

## Experimental Details

### Preparation of triyne 1a-h<sup>1</sup>

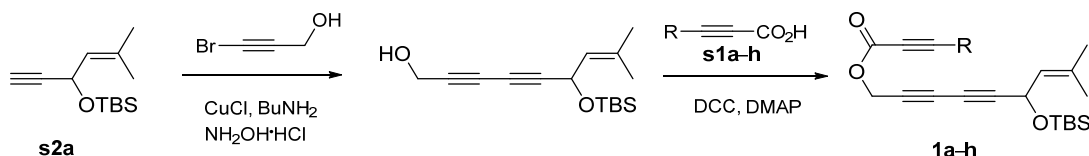

In a schlenk flask containing CuCl (80.5 mg, 0.81 mmol) was added 10ml (30% aqueous BuNH<sub>2</sub> solution) under nitrogen flow. A pinch of NH<sub>2</sub>OH·HCl was added until the blue color disappeared. Alkyne **s2a** (700 mg, 3.1 mmol) in CH<sub>2</sub>Cl<sub>2</sub> was added at 0 °C to the flask and the solution became yellow. A solution of propargyl alcohol bromide (505 mg, 3.7 mmol) in CH<sub>2</sub>Cl<sub>2</sub> was added dropwise at 0 °C. The reaction mixture was stirred for 15 min at room temperature. The nitrogen flow was removed, and the biphasic reaction mixture was transferred to a separatory funnel. Dichloromethane layer was separated and dried over anhydrous Na<sub>2</sub>SO<sub>4</sub>. After filtration, the organic layer was concentrated, and the crude material was purified by column chromatography (SiO<sub>2</sub>, hexanes–EtOAc, 5:1) to obtain the diyne (713 mg, 82%) as yellow oil. The diyne (116 mg, 0.5 mmol) was dissolved in CH<sub>2</sub>Cl<sub>2</sub> and cooled to 0 °C. The corresponding carboxylic acid (0.6 mmol), DCC (0.75 mmol) and DMAP (0.05 mmol) was added and the mixture was stirred for 1 h at 0 °C. The precipitate was filtered over a short pad of silica, concentrated

and purified by column chromatography (SiO<sub>2</sub>, hexanes–EtOAc, 5:1) to obtain the triyne **1a–h** (65–88% yield) as colorless oil.

### Preparation of carboxylic acids **s1a, s1b, s1d–g**

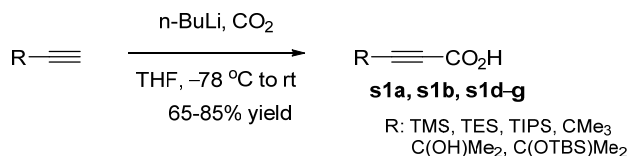

Alkyne (5.0–6.0 mmol) was dissolved in anhydrous THF under N<sub>2</sub> and cooled to –78 °C and *n*-BuLi (2.5 M in hexanes) (1.2 equiv) was added dropwise. The mixture was stirred at –78 °C for 45 min. CO<sub>2</sub> generated from dry ice was dried by passing through a tube containing drierite was bubbled into the reaction mixture for 30 minutes at –78 °C. The reaction was stirred at the same temp for another 30 min and then slowly warmed to room temperature. The reaction was quenched by adding 30 mL 1.0 M HCl. Ethyl acetate (30 mL) was added and the mixture transferred to a separatory funnel. The organic layer was washed with 30 mL water (x1) and 30 mL brine (x2), dried over anhydrous Na<sub>2</sub>SO<sub>4</sub>, filtered and concentrated. The carboxylic acid was used directly without further purification. In case of alkyne with free alcohol 2.2 equiv of *n*-BuLi was used.

### Preparation of carboxylic acid **s1c**

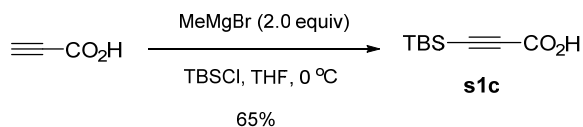

Propiolic acid (500 mg, 7.1 mmol) was dissolved in anhydrous THF under N<sub>2</sub> and cooled to 0 °C. MeMgBr (3.0M in Et<sub>2</sub>O) (5.41 mL, 2.2 equiv) was added dropwise and white precipitate was formed due to formation of carboxylate salts. The mixture was stirred at 0 °C for 30 min followed by addition of TBSCl (1.2 g, 1.2 equiv). The mixture was stirred at 0 °C for another 30 min and slowly warmed to room temp. 1.0 M HCl (10 mL) was added to quench the reaction. Ethyl acetate (30 mL) was added and the mixture was transferred to a separatory funnel. The organic layer was washed with 15 ml water (x1) and 15 ml brine (x2), dried over anhydrous Na<sub>2</sub>SO<sub>4</sub>, filtered, concentrated and purified by column chromatography (SiO<sub>2</sub>, hexanes–EtOAc, 3:1) to obtain the carboxylic acid **s1c** (850 mg, 65%) as a white solid.

### Preparation of alkyne **s2a, s2m–p, s2u**

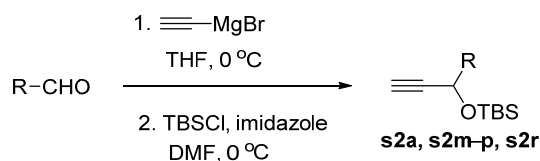

Commercially available aldehydes (prenal, tiglic aldehyde, crotonaldehyde) were used directly for synthesizing **s2a**, **s2m**, and **s2n**. Geranial, neral and but-2-ynal were obtained by oxidation of their corresponding alcohols using  $\text{MnO}_2$  and used for synthesizing **s2o**, **s2p**, and **s2u**. The aldehyde (2.0–5.0 mmol) was dissolved in dry THF under  $\text{N}_2$  and cooled to  $0\text{ }^\circ\text{C}$ . Ethynyl magnesium bromide (0.5 M in THF) (1.1 equiv) was added dropwise and stirred for 30 min. The reaction was quenched with  $\text{NH}_4\text{Cl}$  and extracted with EtOAc. The organic layer was washed with water (x1) followed by brine (x1), dried over anhydrous  $\text{Na}_2\text{SO}_4$ , filtered, concentrated and purified by column chromatography ( $\text{SiO}_2$ , hexanes–EtOAc, 5:1) to obtain the propargyl alcohols as colorless oils. The propargyl alcohols (2.0–5.0 mmol) was dissolved in DMF (0.5 mL/mmol) and cooled to  $0\text{ }^\circ\text{C}$ . TBSCl (1.2 equiv) and imidazole (1.4 equiv) was added and the reaction was stirred for 30 min. The reaction mixture was diluted with hexanes and filtered over silica, concentrated and the alkyne obtained was used for subsequent steps without further purification.

### Preparation of alkyne **s2k**

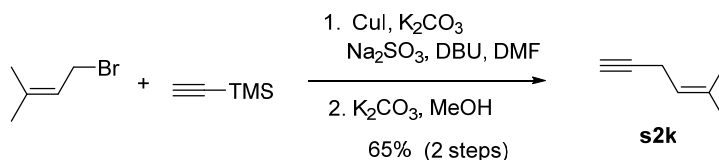

The alkyne **s2k** was synthesized by following literature procedures.<sup>2</sup>

### Preparation of alkyne **s2q**, **s2r**

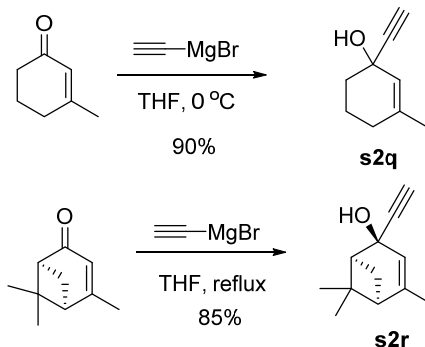

The alkyne **s2q** and **s2r** were prepared by following typical procedure of adding ethynyl magnesium bromide as described above. For **s2r**, reaction conditions involved refluxing under THF for 14 h.

### Preparation of alkyne **s2s**

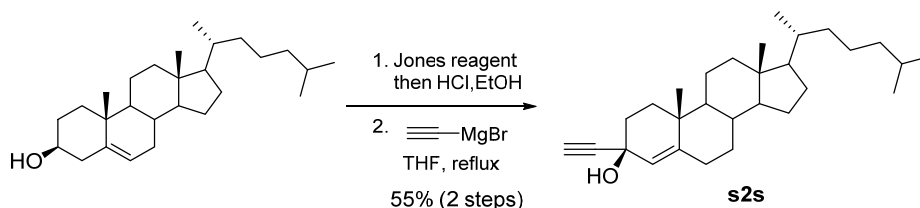

Cholesterol (1.0 g, 2.5mmol) was dissolved in acetone (50 mL) and cooled to 0 °C followed by dropwise addition of Jones reagent (2.7 M) (1.5 mL, 3 mmol). After stirring for 30 min the reaction was quenched by adding 10 mL EtOH and 1 N HCl (10 mL) was added and the mixture was heated at 50 °C for 15 min. The reaction was cooled and solvent was removed under reduced pressure. The residue was diluted with EtOAc and washed with satd.  $\text{NaHCO}_3$  (x1) followed by brine (x1). The organic layer was dried over anhydrous  $\text{Na}_2\text{SO}_4$ , filtered, concentrated and purified by column chromatography ( $\text{SiO}_2$ , hexanes–EtOAc, 10:1) to give pure 4-cholestan-3-one (750 mg, 74%), which was further converted to **s2s** following method described above. The reaction required 14 h under refluxing THF for complete conversion.

### Preparation of alkyne **s2t**

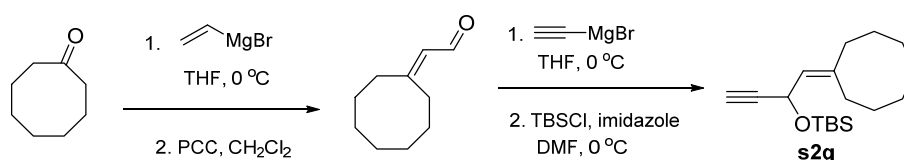

After the preparation of the enal following literature procedures,<sup>3</sup> the enal was converted to **s2t** by the typical procedure described above.

### Preparation of alkyne **s2v**

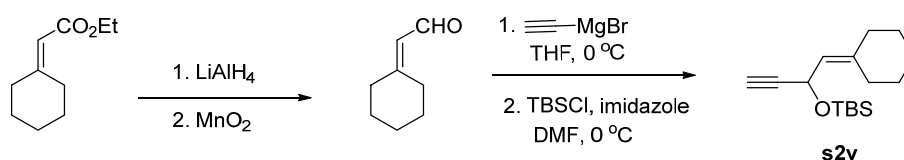

After the preparation of the enal from cyclohexanone (3 steps) following literature procedures,<sup>4</sup> the enal was converted to **s2v** by the typical procedure described above.

### Preparation of triyne 1k, 1m–u

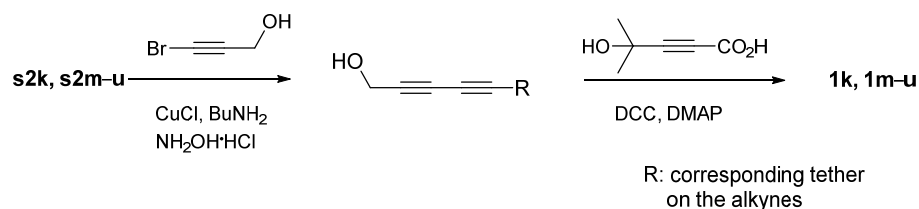

The triynes **1k** and **1m–u** was prepared from the respective alkynes **s2k** and **s2m–u** following the method described above for preparation of related triynes **1a–h**.

### Preparation of imide-tethered triyne 3b–d<sup>5</sup>

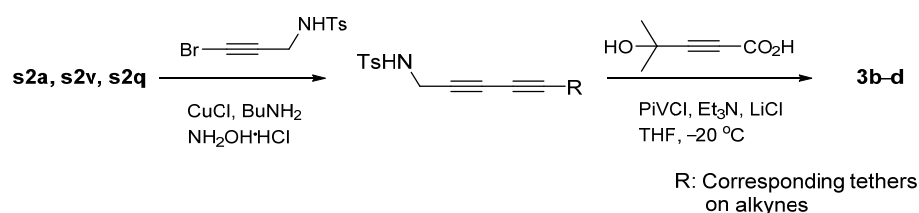

The corresponding diynes were prepared by following typical procedure for a Cadiot–Chodkiewicz coupling described above. The carboxylic acid (1.2 equiv) was dissolved in THF under N<sub>2</sub> and cooled to –20 °C. To it was added pivaloyl chloride (1.4 equiv) followed by Et<sub>3</sub>N (2.5 equiv) and, the mixture was stirred for 2 h at –20 °C. To this solution, LiCl (1.5 equiv) and the diyne (0.5–1.5 mmol) were added. The reaction mixture was allowed to warm to room temp and stirred for another 15 min. The mixture was concentrated, and the residue was directly purified through column chromatography. For **3b** and **3c** (SiO<sub>2</sub>, hexanes–EtOAc, 5:1) and for **3d** (SiO<sub>2</sub>, hexanes–EtOAc, 2:1) was used as eluting solvent in column chromatography.

### Preparation of alkyne s2w

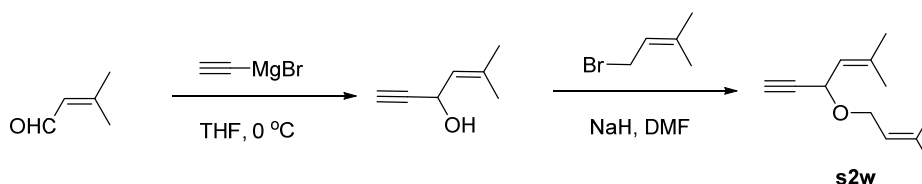

The alkyne **s2w** was prepared by adding ethynyl magnesium bromide as described above followed by a typical Williamson's ether synthesis.

### Preparation of alkynyl bromide **s3a**, **s3v** and **s3w**

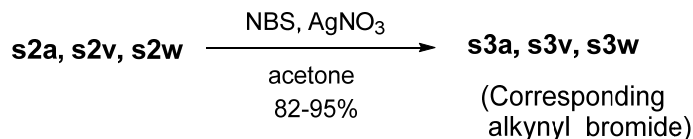

To an acetone solution of alkynes **s2a**, **s2v** and **s2w** (0.5–1.0 mmol) was added AgNO<sub>3</sub> (0.1 equiv) followed by *N*-bromosuccinimide (1.4 equiv) under N<sub>2</sub>. The reaction was stirred under dark in a round bottom flask covered with aluminium foil for 2 h. After completion the acetone was removed under reduced pressure. The residue was dissolved in hexanes filtered over silica and concentrated obtaining the corresponding alkynyl bromides **s3a**, **s3v** and **s3w** were obtained as colorless oil (82–95% yield), which were directly used without further purification.

### Preparation of triyne **1j**

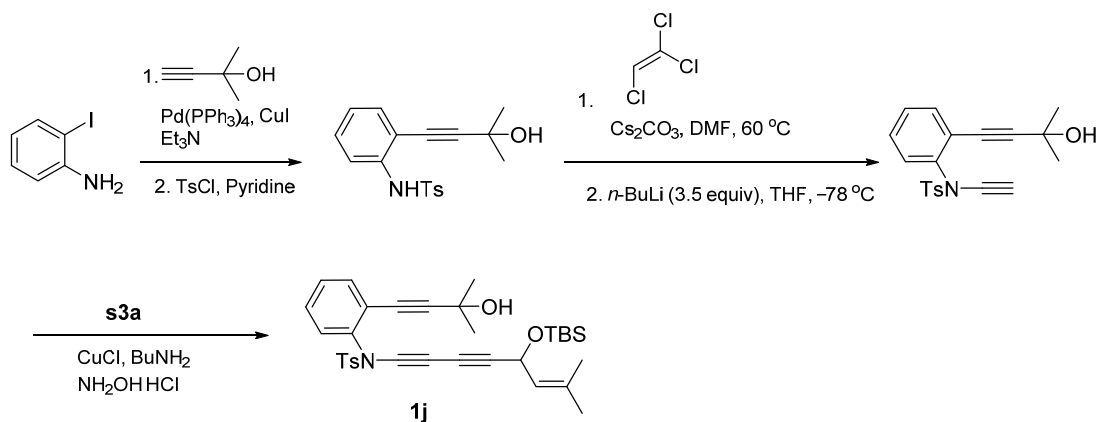

The triyne **1j** was synthesized by following literature procedure for related compounds.<sup>6</sup>

### Preparation of triyne **3a**

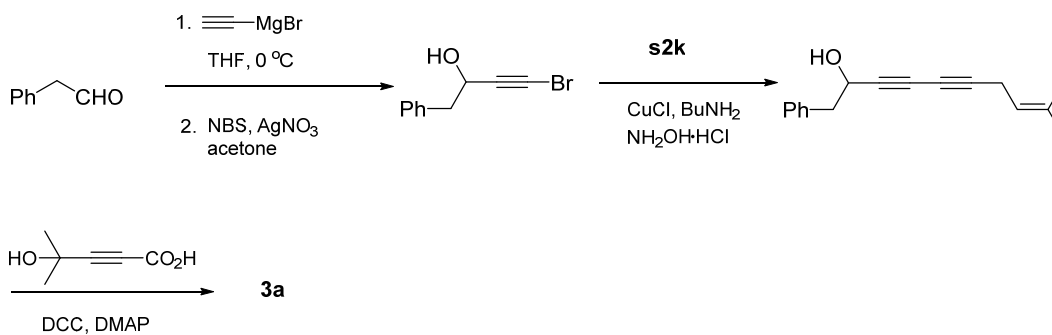

The triyne **3a** was synthesized by following the procedure

### Preparation of benzene-tethered triyne **3f**, **3g**, **3i**<sup>7</sup>

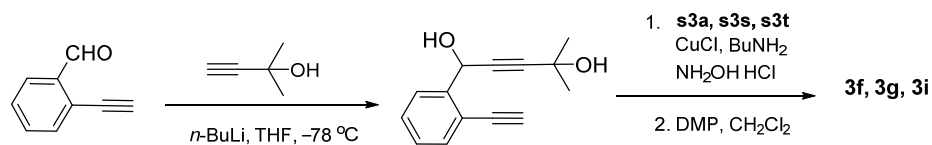

The benzene tethered triynes **3f**, **3g**, and **3i** were synthesized by following literature procedures involving alkynyl anion addition to the aldehyde followed by typical coupling with alkynyl bromides **s3a**, **s3s**, and **s3t** respectively and oxidation using DMP. Oxidation with  $\text{MnO}_2$  was also tried but gave significantly low yield.

### Preparation of Enone-tethered triyne **3g**<sup>7</sup>

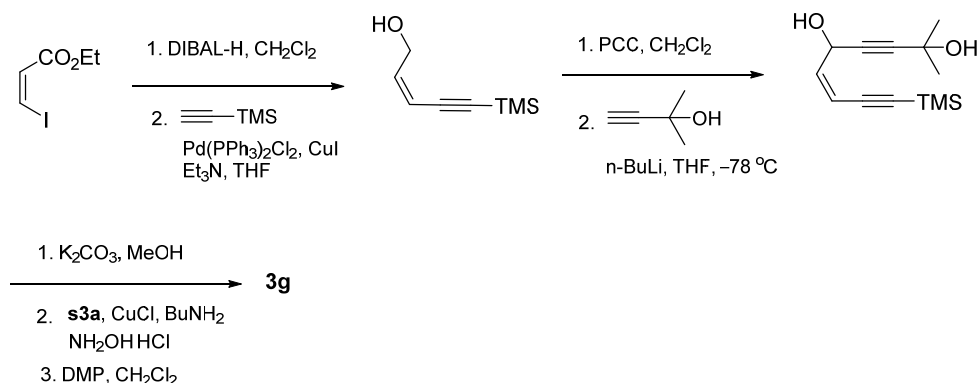

The triyne **3g** was prepared following literature procedure starting from the vinylic iodide involving the reduction to alcohol using DIBAL-H, a Sonogashira coupling, oxidation to aldehyde, alkynyl anion addition, TMS-deprotection, coupling of alkynyl bromide and DMP oxidation.

### Preparation of **3h**

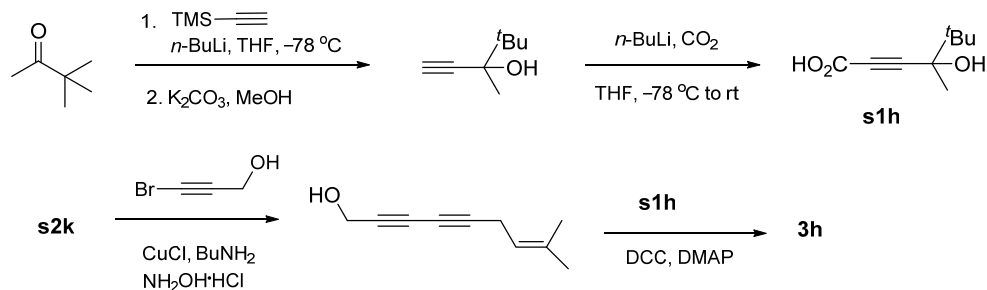

The triyne **3h** was prepared starting from pinacolone following standard reaction condition described above for synthesizing related triynes.



### Preparation of **2e** (1.0 mmol scale) via intramolecular Alder-Ene reaction

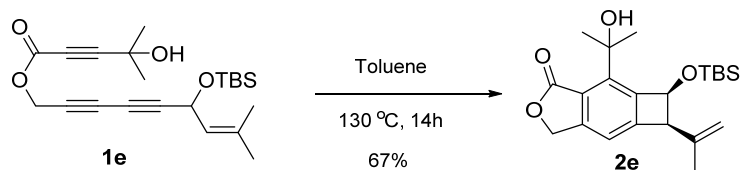

A toluene solution (0.05 M) of the triene (400 mg, 1.0 mmol) was heated in a Schlenk tube at 130 °C for 14 h. After completion, the reaction was cooled to room temperature and toluene was removed under reduced pressure. The residue was purified by flash chromatography (SiO<sub>2</sub>, hexanes–EtOAc, 6:1) to obtain **2e** (268 mg, 67% yield) as white solid with complete *cis*-diastereoselectivity.

### General procedure for Alder-Ene reactions to generate benzocyclobutenes

A toluene solution (0.05 M) of the triene (0.1–0.3 mmol) was heated in a Schlenk tube at 130 °C for ester-tethered and 90 °C for imide, benzene and enone tether for 14 h. After completion, the reaction was cooled to room temperature and the solvent was removed under reduced pressure. The residue was then purified by column chromatography. The yield, solvent system used for purification, and physical property of the isolated compounds are given in the characterization data.

### TBS-deprotection with **2e**

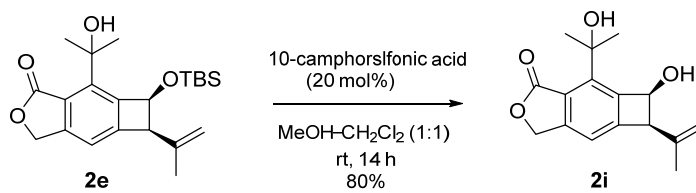

Benzocyclobutene **2e** (230 mg, 0.6 mmol) was dissolved in MeOH–CH<sub>2</sub>Cl<sub>2</sub> (1:1), and 10-camphorsulfonic acid (30 mg, 0.12 mmol) was added, and the mixture was stirred at rt for 14 h. The solvent was removed under reduced pressure, and the residue was directly purified by flash column chromatography (hexanes–EtOAc, 2:1) to give compound **2i** (130 mg, 80 %) as white solid.

### MnO<sub>2</sub>-mediated ring cleavage and allylic oxidation of **2l**

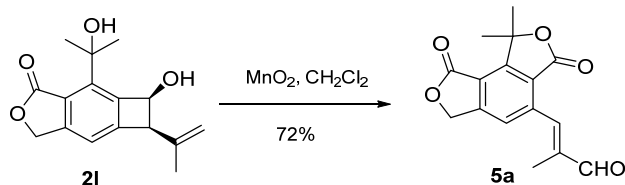

Benzocyclobutenol **2l** (30 mg, 0.1 mmol) was dissolved in CH<sub>2</sub>Cl<sub>2</sub>, and MnO<sub>2</sub> (48 mg, 0.5 mmol) was added and stirred for 15 min. The mixture was filtered over a short pad of celite, concentrated and the residue was purified by column chromatography (SiO<sub>2</sub>, hexanes–EtOAc, 5:1 → 2:1) to afford **5a** (22 mg, 72%) as white solid.

### Proposed Mechanism for MnO<sub>2</sub>-mediated oxidation to generate **5a**

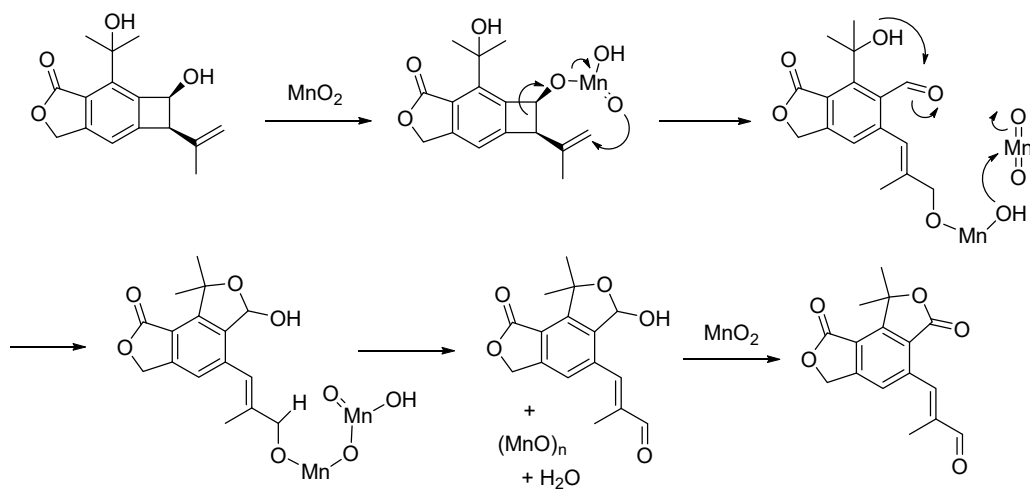

### DMP oxidation of **2l**

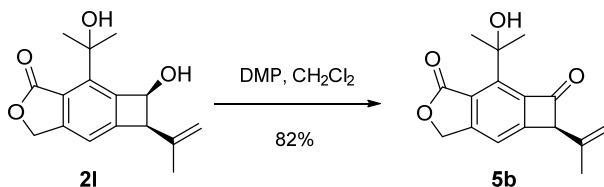

Benzocyclobutenol **2l** (65 mg, 0.2 mmol) was dissolved in CH<sub>2</sub>Cl<sub>2</sub> and DMP (110 mg, 0.25 mmol) was added and stirred at room temp for 3 h. After completion, Na<sub>2</sub>S<sub>2</sub>O<sub>3</sub> solution (1 mL), saturated NaHCO<sub>3</sub> (1 mL) and water (1 mL) were added, and the mixture was stirred vigorously until two distinct layers were formed. The mixture was diluted with CH<sub>2</sub>Cl<sub>2</sub> and organic layer was separated and washed with water (x1) and brine (x1), dried over anhydrous Na<sub>2</sub>SO<sub>4</sub>, filtered, concentrated and purified by column chromatography (SiO<sub>2</sub>, hexanes–EtOAc, 5:1 → 2:1) to give ketone **5b** (53 mg, 82%) as white solid.

### One-carbon homologation of **5b**

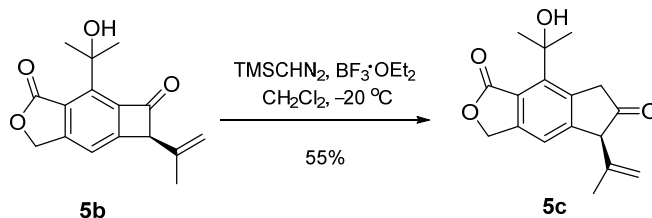

Benzocyclobutenone **5b** (20 mg, 0.06 mmol) was dissolved in dry CH<sub>2</sub>Cl<sub>2</sub> under N<sub>2</sub> and cooled -20 °C. TMSCHN<sub>2</sub> (2.0 M in hexanes, 0.04 mL, 0.07 mmol) and BF<sub>3</sub>·OEt<sub>2</sub> (0.01 mL) were added dropwise. The mixture was stirred at -20 °C for 20 min. After completion, the reaction was quenched with saturated NH<sub>4</sub>Cl and extracted with CH<sub>2</sub>Cl<sub>2</sub>. The organic layer was washed with water (x1) and brine (x1), dried over anhydrous Na<sub>2</sub>SO<sub>4</sub>, filtered, concentrated and purified by column chromatography (SiO<sub>2</sub>, hexanes–EtOAc, 5:1 → 3:1) to give ketone **5c** (12 mg, 55%) as colorless oil.

### TBAF-induced ring cleavage of **2e**

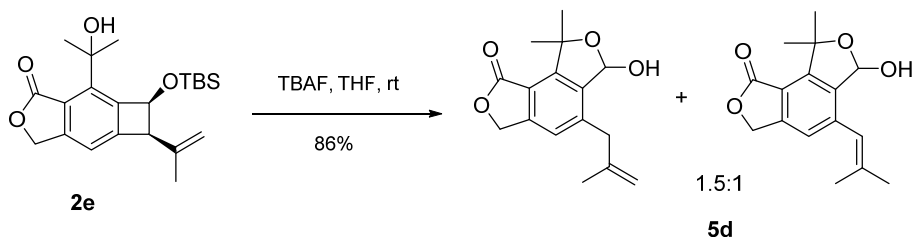

To a THF solution of **2e** (60 mg, 0.15 mmol) was added TBAF (1.0 M in THF) (0.18 mL) and the mixture was stirred for 20 min at room temperature. The reaction was quenched with satd. NH<sub>4</sub>Cl and extracted with EtOAc. The organic layer was washed with water (x1) and brine (x1), dried over anhydrous Na<sub>2</sub>SO<sub>4</sub>, filtered, concentrated and purified by column chromatography (gradient elution, hexanes–EtOAc, 5:1 to 3:1) to give a mixture of isomeric alkenes **5d** (35 mg, 86%) as colorless oil.

### Ring expansion of **2r**

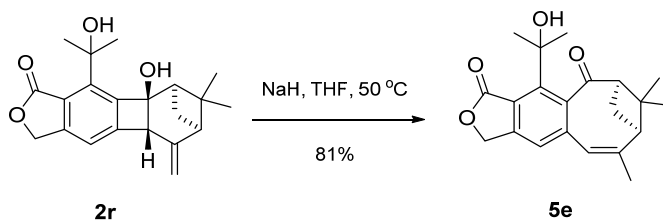

To a THF solution of **2r** (30 mg, 0.10 mmol) was added NaH (60% in mineral oil, 3 mg, 0.12 mmol) under N<sub>2</sub> and the mixture was stirred for 30 min at 50 °C. The reaction was filtered over a short pad of celite,

concentrated and purified by column chromatography (hexanes–EtOAc, 4:1) to give a mixture of isomeric alkenes **5e** (35 mg, 81%) as colorless oil.

## References:

- 1 R. Karmakar, S. Y. Yun, J. Chen, Y. Xia and D. Lee, *Angew. Chem., Int. Ed.*, 2015, **54**, 6582–6586.
- 2 L. W. Bieber and M. F. da Silva, *Tetrahedron Lett.*, 2007, **48**, 7088–7090.
- 3 W. G. Dauben and D. Mincho, *J. Org. Chem.*, 1977, **42**, 682–685.
- 4 A. D. Fotiadou and A. F. Zografos, *Org. Lett.*, 2012, **14**, 5664–5667.
- 5 G.-J. Ho and D. J. Marthe, *J. Org. Chem.*, 1995, **60**, 2271–2273.
- 6 T. Wang and T. R. Hoye, *J. Am. Chem. Soc.*, 2016, **138**, 13870–13873
- 7 T. R. Hoye, B. Baire, D. Niu, D. P. H. Willoughby, B. P. Woods, *Nature*, **2012**, *490*, 208–212.

## Characterization Data

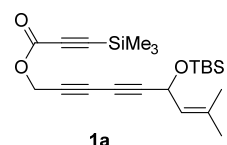**1a**: colorless oil;  $^1\text{H NMR}$  ( $\text{CDCl}_3$ , 500 MHz):  $\delta$  5.27 (d,  $J$  = 8.2 Hz, 1H), 5.08 (d,  $J$  = 8.2 Hz, 1H), 4.81 (s, 2H), 1.72 (s, 3H), 1.67 (s, 3H), 0.89 (s, 9H), 0.25 (s, 9H), 0.12 (s, 3H), 0.10 (s, 3H);  $^{13}\text{C NMR}$  ( $\text{CDCl}_3$ , 500 MHz):  $\delta$  151.9, 135.3, 124.6, 95.9, 93.5, 81.4, 71.8, 71.7, 67.4, 60.4, 53.6, 25.7, 18.2, –0.95, –4.5, –4.7; **HRMS** (ESI) calcd for  $\text{C}_{22}\text{H}_{34}\text{O}_3\text{NaSi}$   $[\text{M}+\text{Na}]^+$  425.1944, found 425.1964.

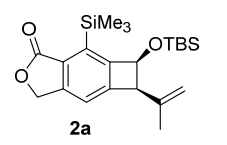**2a**: white solid; 25 mg (45% yield, 10:1 *dr*); Purification: Flash Chromatography ( $\text{SiO}_2$ , hexanes–EtOAc, 50:1  $\rightarrow$  20:1);  $^1\text{H NMR}$  ( $\text{CDCl}_3$ , 500 MHz):  $\delta$  7.17 (s, 1H), 5.29–5.21 (m, 2H), 5.19 (s, 1H), 4.94 (s, 1H), 4.89 (s, 1H), 3.80 (s, 1H), 1.77 (s, 3H), 0.91 (s, 9H), 0.43 (s, 9H), 0.17 (s, 3H), 0.12 (s, 3H);  $^{13}\text{C NMR}$  ( $\text{CDCl}_3$ , 500 MHz):  $\delta$  153.9, 150.6, 147.9, 142.7, 138.8, 129.6, 119.9, 117.3, 112.8, 76.3, 69.4, 59.7, 25.9, 20.7, 17.9, –0.28, –3.4, –4.75; **HRMS** (ESI) calcd for  $\text{C}_{22}\text{H}_{34}\text{O}_3\text{NaSi}$   $[\text{M}+\text{Na}]^+$  425.1944, found 425.1945.

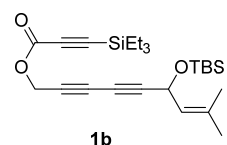**1b**: colorless oil;  $^1\text{H NMR}$  ( $\text{CDCl}_3$ , 500 MHz):  $\delta$  5.27 (d,  $J$  = 8.1 Hz, 1H), 5.08 (d,  $J$  = 8.1 Hz, 1H), 4.81 (s, 2H), 1.72 (s, 3H), 1.66 (s, 3H), 1.01 (t,  $J$  = 8.0 Hz, 9H), 0.88 (s, 9H), 0.67 (q,  $J$  = 8.0 Hz, 6H), 0.11 (s, 3H), 0.09 (s, 3H);  $^{13}\text{C NMR}$  ( $\text{CDCl}_3$ , 500 MHz):  $\delta$  151.9, 135.2, 124.6, 94.7, 94.1, 81.3, 71.8, 71.7, 67.4, 60.3, 53.6, 25.7, 25.5, 18.2, 7.2, 3.7, –4.5, –4.6; **HRMS** (ESI) calcd for  $\text{C}_{25}\text{H}_{40}\text{O}_3\text{NaSi}_2$   $[\text{M}+\text{Na}]^+$  467.2414, found 467.2403.

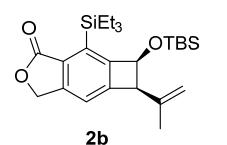**2b**: white solid; 32 mg (48% yield, 7:1 *dr*); Purification: Flash Chromatography ( $\text{SiO}_2$ , hexanes–EtOAc, 50:1  $\rightarrow$  20:1);  $^1\text{H NMR}$  ( $\text{CDCl}_3$ , 500 MHz):  $\delta$  7.16 (s, 1H), 5.28–5.19 (m, 2H), 5.17 (s, 1H), 4.95 (s, 1H), 4.91 (s, 1H), 3.79 (s, 1H), 1.70 (s, 3H), 1.11–0.91 (m, 6H), 0.94–0.86 (m, 18H), 0.20 (s, 3H), 0.15 (s, 3H);  $^{13}\text{C NMR}$  ( $\text{CDCl}_3$ , 500 MHz):  $\delta$  171.9,

155.2, 150.7, 148.1, 142.6, 136.8, 129.9, 123.5, 119.9, 117.1, 113.1, 76.1, 68.4, 59.8, 25.8, 7.6, 3.0, -3.5, -5.1; **HRMS** (ESI) calcd for C<sub>25</sub>H<sub>40</sub>O<sub>3</sub>NaSi<sub>2</sub> [M+Na]<sup>+</sup> 467.2414, found 467.2398.

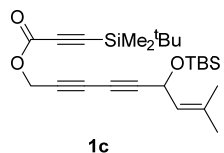

**1c**: colorless oil; <sup>1</sup>H NMR (CDCl<sub>3</sub>, 500 MHz): δ 5.26 (dt, *J* = 1.5, 8.5 Hz, 1H), 5.08 (d, *J* = 8.0 Hz, 1H), 4.80 (s, 2H), 1.72 (s, 3H), 1.68 (s, 3H), 0.96 (s, 9H), 0.88 (s, 9H), 0.18 (s, 6H), 0.11 (s, 3H), 0.09 (s, 3H); <sup>13</sup>C NMR (CDCl<sub>3</sub>, 500 MHz): δ 151.8, 135.2, 124.6, 94.6, 94.3, 81.3, 71.8, 67.4, 60.4, 53.6, 25.9, 25.7, 25.5, 18.2, 16.5, -4.5, -4.7, -5.3; **HRMS** (ESI) calcd for C<sub>25</sub>H<sub>40</sub>O<sub>3</sub>NaSi<sub>2</sub> [M+Na]<sup>+</sup> 467.2414, found 467.2415.

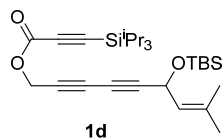

**1d**: colorless oil; <sup>1</sup>H NMR (CDCl<sub>3</sub>, 500 MHz): δ 5.27 (d, *J* = 7.5 Hz, 1H), 5.08 (d, *J* = 8.0 Hz, 1H), 4.81 (s, 2H), 1.72 (s, 3H), 1.66 (s, 3H), 1.34–1.26 (m, 3H), 1.10 (s, 18H), 0.88 (s, 9H), 0.11 (s, 3H), 0.10 (s, 3H); <sup>13</sup>C NMR (CDCl<sub>3</sub>, 500 MHz): δ 151.9, 135.2, 124.6, 95.6, 93.3, 81.3, 71.9, 71.7, 67.5, 60.4, 53.5, 25.7, 25.5, 18.4, 10.9, -4.7, -4.5; **HRMS** (ESI) calcd for C<sub>28</sub>H<sub>46</sub>O<sub>3</sub>NaSi<sub>2</sub> [M+Na]<sup>+</sup> 509.2883, found 509.2891.

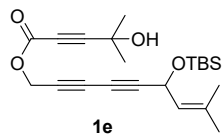

**1e**: colorless oil; <sup>1</sup>H NMR (CDCl<sub>3</sub>, 500 MHz): δ 5.26 (d, *J* = 8.4 Hz, 1H), 5.08 (d, *J* = 7.1 Hz, 1H), 4.81 (s, 2H), 2.5 (br s, 1H, OH), 1.71 (s, 3H), 1.65 (s, 3H), 1.55 (s, 6H), 0.87 (s, 9H), 0.10 (s, 3H), 0.09 (s, 3H); <sup>13</sup>C NMR (CDCl<sub>3</sub>, 500 MHz): δ 152.5, 135.3, 124.6, 92.7, 81.4, 73.2, 71.9, 71.7, 67.4, 64.9, 60.3, 53.7, 30.4, 25.7, 25.5, 18.2, -4.7, -4.5; **HRMS** (ESI) calcd for C<sub>22</sub>H<sub>33</sub>O<sub>4</sub>Si [M+H]<sup>+</sup> 389.2148, found 389.2132.

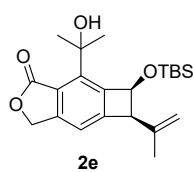

**2e**: white solid; 268 mg (67% yield); Purification: Flash Chromatography (SiO<sub>2</sub>, hexanes–EtOAc, 6:1); <sup>1</sup>H NMR (CDCl<sub>3</sub>, 500 MHz): δ 7.10 (s, 1H), 6.14 (s, 1H, OH), 5.36–5.24 (m, 2H), 5.22 (s, 1H), 4.96 (s, 1H), 4.90 (s, 1H), 3.78 (s, 1H), 1.79 (s, 3H), 1.71 (s, 3H), 1.67 (s, 3H), 0.91 (s, 9H), 0.18 (s, 3H), 0.14 (s, 3H); <sup>13</sup>C NMR (CDCl<sub>3</sub>, 500 MHz): δ 173.5, 152.9, 150.5, 148.3, 143.3, 141.9, 121.4, 115.7, 113.7, 75.5, 72.3, 70.1, 59.9, 30.9, 28.5, 25.8, 20.3, 17.8, -3.7, -5.3; **HRMS** (ESI) calcd for C<sub>22</sub>H<sub>33</sub>O<sub>4</sub>Si [M+H]<sup>+</sup> 389.2148, found 389.2158.

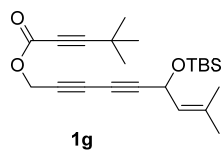

**1g**: colorless oil; <sup>1</sup>H NMR (CDCl<sub>3</sub>, 500 MHz): δ 5.26 (d, *J* = 8.7 Hz, 1H), 5.08 (d, *J* = 8.1 Hz, 1H), 4.79 (s, 2H), 2.5 (br s, 1H, OH), 1.71 (s, 3H), 1.65 (s, 3H), 1.28 (s, 9H), 0.88 (s, 9H), 0.11 (s, 3H), 0.09 (s, 3H); <sup>13</sup>C NMR (CDCl<sub>3</sub>, 500 MHz): δ 152.9, 135.2, 124.7, 98.3, 81.2, 72.0, 71.6, 67.5, 60.4, 53.4, 30.0, 29.8, 27.6, 25.8, 25.5, 18.2, -4.5, -4.7; **HRMS** (ESI) calcd for C<sub>23</sub>H<sub>34</sub>O<sub>3</sub>NaSi [M+Na]<sup>+</sup> 409.2175, found 409.2187.

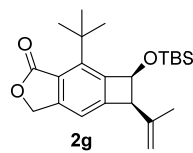

dr: 5:1

**2g**: colorless oil; 22 mg (49% yield, 5:1 dr); Purification: Flash Chromatography (SiO<sub>2</sub>, hexanes–EtOAc, 20:1 → 10:1); <sup>1</sup>H NMR (CDCl<sub>3</sub>, 500 MHz) (for major diastereomer): δ 7.02 (s, 1H), 5.22 (s, 1H), 5.20–5.17 (m, 2H), 4.95 (s, 1H), 4.90 (s, 1H), 3.75 (s, 1H), 1.73 (s, 3H), 1.59 (s, 9H), 0.92 (s, 9H), 0.15 (s, 3H), 0.13 (s, 3H); <sup>13</sup>C NMR (CDCl<sub>3</sub>, 500 MHz) (all

discernable signals for both :  $\delta$  170.6, 152.7, 151.0, 150.8, 144.6, 142.5, 122.5, 116.5, 114.8, 114.5, 113.1, 76.6, 75.9, 68.3, 68.2, 59.4, 56.3, 36.3, 30.6, 30.2, 25.9, 25.8, 20.4, 17.9, -3.7, -5.1; **HRMS** (ESI) calcd for  $C_{23}H_{35}O_3Si$   $[M+H]^+$  387.2355, found 387.2354.

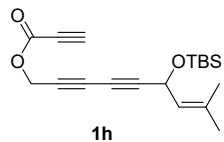

**1h**: colorless oil;  $^1H$  NMR ( $CDCl_3$ , 500 MHz):  $\delta$  5.27 (dt,  $J = 1.6, 8.3$  Hz, 1H), 5.09 (d,  $J = 8.5$  Hz, 1H), 4.84 (s, 2H), 2.95 (s, 1H), 1.72 (s, 3H), 1.67 (s, 3H), 0.89 (s, 9H), 0.12 (s, 3H), 0.10 (s, 3H);  $^{13}C$  NMR ( $CDCl_3$ , 500 MHz):  $\delta$  151.8, 135.3, 124.6, 81.5, 76.1, 73.8, 72.1, 71.4, 67.4, 60.4, 53.9, 25.8, 25.4, 18.2, -4.5, -4.7; **HRMS** (ESI) calcd for  $C_{19}H_{26}O_3NaSi$   $[M+Na]^+$  353.1549, found 353.1554.

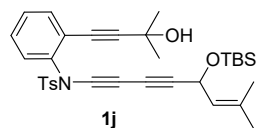

**1j**: yellow oil;  $^1H$  NMR ( $CDCl_3$ , 500 MHz):  $\delta$  7.68 (d,  $J = 8.1$  Hz, 2H), 7.43–7.38 (m, 1H), 7.35–7.28 (m, 2H), 7.27–7.23 (m, 1H), 5.26 (d,  $J = 8.1$  Hz, 1H), 5.11 (d,  $J = 9.22$  Hz, 1H), 2.45 (s, 1H), 2.04 (br s, 1H, OH), 1.70 (s, 3H), 1.64 (s, 3H), 1.47 (s, 6H), 0.88 (s, 9H), 0.10 (s, 3H), 0.08 (s, 3H);  $^{13}C$  NMR ( $CDCl_3$ , 500 MHz):  $\delta$  145.3, 138.2, 134.5, 134.4, 133.4, 129.9, 129.2, 128.9, 128.4, 125.1, 122.4, 100.7, 84.1, 77.4, 70.5, 68.1, 60.7, 58.3, 30.9, 25.8, 25.5, 21.7, 18.2, -4.4, -4.6; **HRMS** (ESI) calcd for  $C_{33}H_{41}NO_4NaSi$   $[M+Na]^+$  598.2423, found 598.2411.

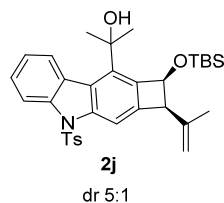

**2j**: yellow solid; 11 mg (28% yield, 5:1 dr); Purification: Flash Chromatography ( $SiO_2$ , hexanes–EtOAc, 10:1);  $^1H$  NMR ( $CDCl_3$ , 500 MHz) (for major diastereomer):  $\delta$  8.45 (d,  $J = 7.9$  Hz, 2H), 8.16 (s, 1H), 7.66 (d,  $J = 8.4$  Hz, 2H), 7.45 (t,  $J = 8.1$  Hz, 1H), 7.35 (t,  $J = 7.6$  Hz, 1H), 7.11 (d,  $J = 8.0$  Hz, 2H), 5.34–5.32 (m, 1H), 5.01–4.98 (m, 2H), 3.92 (s, 1H), 1.90 (s, 3H), 1.85 (s, 3H), 1.76 (s, 3H), 0.95 (s, 9H), 0.22 (s, 3H), 0.19 (s, 3H);  $^{13}C$  NMR ( $CDCl_3$ , 500 MHz) (all discernable signals for both isomers):  $\delta$  144.9, 143.4, 143.0, 141.3, 140.9, 138.4, 137.7, 135.0, 129.7, 129.6, 126.6, 126.3, 126.0, 125.5, 123.2, 116.1, 114.8, 113.2, 109.5, 76.0, 73.4, 59.6, 57.2, 31.2, 29.7, 28.2, 25.8, 25.9, 21.5, 20.0, -3.5, -5.1; **HRMS** (ESI) calcd for  $C_{33}H_{41}NO_4NaSi$   $[M+Na]^+$  598.2423, found 598.2419.

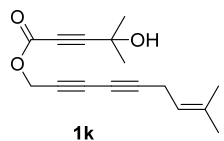

**1k**: colorless oil;  $^1H$  NMR ( $CDCl_3$ , 500 MHz):  $\delta$  5.16–5.09 (m, 1H), 4.79 (s, 2H), 2.97–2.92 (m, 2H), 1.70 (s, 3H), 1.61 (s, 3H), 1.55 (s, 6H);  $^{13}C$  NMR ( $CDCl_3$ , 500 MHz):  $\delta$  152.6, 135.4, 116.6, 92.6, 81.0, 73.2, 68.3, 65.0, 63.6, 53.9, 30.4, 25.4, 18.3, 17.7; **HRMS** (ESI) calcd for  $C_{16}H_{18}O_3Na$   $[M+Na]^+$  281.1154, found 281.1153.

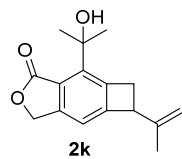

**2k**: white solid; 32 mg (72% yield); Purification: Flash Chromatography ( $SiO_2$ , hexanes–EtOAc, 6:1);  $^1H$  NMR ( $CDCl_3$ , 500 MHz):  $\delta$  7.11 (s, 1H), 6.31 (s, 1H, OH), 5.32 (s, 2H), 4.85 (s, 1H), 4.83 (s, 1H), 4.02–3.97 (m, 1H), 3.58 (dd,  $J = 8.3, 5.5$  Hz, 1H), 3.15–3.11 (m, 1H), 1.79 (s, 3H), 1.64 (s, 3H), 1.63 (s, 3H);  $^{13}C$  NMR ( $CDCl_3$ , 500 MHz):  $\delta$  174.1, 155.5, 148.9, 146.0, 143.9, 140.4, 121.2, 115.3, 110.9, 71.9, 70.3, 47.6, 38.0, 30.2, 30.1, 20.4; **HRMS** (ESI) calcd for  $C_{16}H_{18}O_3Na$   $[M+Na]^+$  281.1154, found 281.1152.

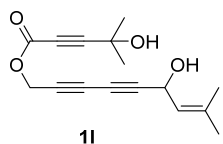

**1l:** colorless oil;  $^1\text{H NMR}$  ( $\text{CDCl}_3$ , 500 MHz):  $\delta$  5.37–5.27 (m, 1H), 5.14–5.08 (d,  $J = 8.3$  Hz, 1H), 4.82 (s, 2H), 1.75 (s, 3H), 2.33 (br s, 1H, OH), 2.04 (br s, 1H, OH), 1.71 (s, 3H), 1.66 (s, 6H);  $^{13}\text{C NMR}$  ( $\text{CDCl}_3$ , 500 MHz):  $\delta$  152.5, 138.4, 123.2, 92.7, 80.6, 73.2, 72.2, 71.5, 68.1, 65.1, 59.4, 53.7, 30.4, 25.6, 18.2; **HRMS** (ESI) calcd for  $\text{C}_{16}\text{H}_{18}\text{O}_4\text{Na}$   $[\text{M}+\text{Na}]^+$  297.1103, found 297.1096.

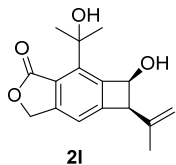

**2l:** white solid; 15 mg (30% yield); Purification: Flash Chromatography ( $\text{SiO}_2$ , hexanes–EtOAc, 2:1)  $^1\text{H NMR}$  ( $\text{CDCl}_3$ , 500 MHz):  $\delta$  7.18 (s, 1H), 5.57 (br s, 1H, OH), 5.37–5.27 (m, 2H), 4.99 (s, 1H), 4.87 (s, 1H), 4.75 (s, 1H), 3.85 (br s, 1H, OH), 3.77 (s, 1H), 1.86 (s, 3H), 1.75 (s, 3H), 1.69 (s, 3H);  $^{13}\text{C NMR}$  ( $\text{CDCl}_3$ , 500 MHz):  $\delta$  172.9, 152.1, 150.6, 147.6, 143.3, 142.4, 121.1, 116.5, 111.4, 76.8, 72.8, 69.9, 59.4, 30.5, 29.3, 21.2; **HRMS** (ESI) calcd for  $\text{C}_{16}\text{H}_{19}\text{O}_4$   $[\text{M}+\text{H}]^+$  275.1283, found 275.1283.

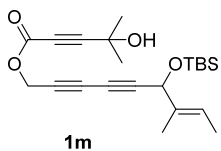

**1m:** colorless oil;  $^1\text{H NMR}$  ( $\text{CDCl}_3$ , 500 MHz):  $\delta$  5.62–5.53 (m, 1H), 4.82 (s, 2H), 4.75 (s, 1H), 1.67 (s, 3H), 1.61 (d,  $J = 6.3$  Hz, 3H), 1.56 (s, 6H), 0.89 (s, 9H), 0.11 (s, 3H), 0.08 (s, 3H);  $^{13}\text{C NMR}$  ( $\text{CDCl}_3$ , 500 MHz):  $\delta$  152.0, 134.6, 121.8, 92.7, 80.9, 73.2, 71.8, 71.5, 68.7, 68.2, 65.0, 53.7, 30.4, 25.7, 18.2, 13.2, 11.8, –4.70, –5.02; **HRMS** (ESI) calcd for  $\text{C}_{22}\text{H}_{32}\text{O}_4\text{NaSi}$   $[\text{M}+\text{Na}]^+$  411.1968, found 411.1973.

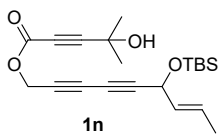

**1n:** colorless oil;  $^1\text{H NMR}$  ( $\text{CDCl}_3$ , 500 MHz):  $\delta$  5.81–5.72 (m, 1H), 5.52–5.45 (m, 1H), 4.86 (d,  $J = 5.6$  Hz, 1H), 4.81 (s, 2H), 2.46 (s, 1H, OH), 1.70 (d,  $J = 6.5$  Hz, 3H), 1.56 (s, 6H), 0.89 (s, 9H), 0.11 (s, 3H), 0.10 (s, 3H);  $^{13}\text{C NMR}$  ( $\text{CDCl}_3$ , 500 MHz):  $\delta$  152.5, 129.8, 127.9, 92.7, 80.5, 73.2, 71.8, 71.7, 68.6, 65.0, 63.8, 53.7, 30.4, 25.7, 18.3, 17.4, –4.6, –4.8; **HRMS** (ESI) calcd for  $\text{C}_{21}\text{H}_{30}\text{O}_4\text{NaSi}$   $[\text{M}+\text{Na}]^+$  397.1811, found 397.1806.

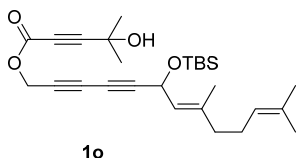

**1o:** colorless oil;  $^1\text{H NMR}$  ( $\text{CDCl}_3$ , 500 MHz):  $\delta$  5.28–5.24 (m, 1H), 5.11–5.03 (m, 1H), 4.81 (s, 2H), 2.38 (s, 1H, OH), 2.12–2.05 (m, 2H), 2.04–1.98 (m, 2H), 1.67 (s, 3H), 1.65 (s, 3H), 1.59 (s, 3H), 1.56 (s, 6H), 0.88 (s, 9H), 0.1 (s, 3H), 0.09 (s, 3H);  $^{13}\text{C NMR}$  ( $\text{CDCl}_3$ , 500 MHz):  $\delta$  152.5, 138.5, 131.9, 124.5, 123.6, 92.7, 81.4, 73.2, 71.9, 71.6, 67.3, 65.0, 60.4, 53.7, 39.2, 30.2, 26.1, 25.74, 25.67, 18.2, 17.7, 16.6, –4.5, –4.7; **HRMS** (ESI) calcd for  $\text{C}_{27}\text{H}_{40}\text{O}_4\text{NaSi}$   $[\text{M}+\text{Na}]^+$  479.2594, found 479.2590.

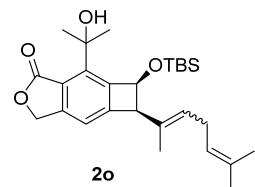

**2o:** white solid; 32 mg (67% yield, 2.5:1 E/Z); Purification: Flash Chromatography ( $\text{SiO}_2$ , hexanes–EtOAc, 10:1  $\rightarrow$  6:1).  $^1\text{H NMR}$  ( $\text{CDCl}_3$ , 500 MHz) **Major isomer:**  $\delta$  7.02 (s, 1H), 6.13 (s, 1H, OH), 5.39 (t,  $J = 7.4$  Hz, 1H), 5.33 (s, 1H), 5.32–5.28 (m, 2H), 5.14 (t,  $J = 6.1$  Hz, 1H), 4.21 (s, 1H), 2.80–2.72 (m, 2H), 1.80 (s, 3H), 1.73 (s, 3H), 1.68 (s, 3H), 1.65 (s, 3H), 1.58 (s, 3H), 0.93 (s, 9H), 0.17 (s, 3H), 0.12 (s, 3H); **Minor isomer:** 7.09 (s, 1H), 6.13 (s, 1H), 5.39 (t,  $J = 7.4$  Hz, 1H), 5.33 (s, 1H), 5.32–5.28 (m,

2H), 5.14 (t,  $J = 6.1$  Hz, 1H, OH), 3.73 (s, 1H), 2.98–2.87 (m, 2H), 1.80 (s, 3H), 1.70 (s, 3H), 1.68 (s, 3H), 1.64 (s, 3H), 1.57 (s, 3H), 0.92 (s, 9H), 0.17 (s, 3H), 0.13 (s, 3H)  $^{13}\text{C NMR}$  ( $\text{CDCl}_3$ , 500 MHz) (all discernable signals for both isomers):  $\delta$  173.4, 153.5, 150.6, 148.1, 143.5, 132.2, 131.3, 130.9, 127.7, 122.5, 122.2, 121.3, 115.7, 75.4, 73.8, 72.3, 70.0, 61.5, 54.4, 31.0, 28.7, 28.6, 27.2, 27.0, 25.8, 25.7, 19.8, 17.8, 13.8, –3.7, –4.3, –5.2, –5.3; **HRMS** (ESI) calcd for  $\text{C}_{27}\text{H}_{41}\text{O}_4\text{Si}$   $[\text{M}+\text{H}]^+$  457.2774, found 457.2779.

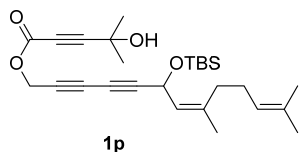

**1p**: Colorless oil  $^1\text{H NMR}$  ( $\text{CDCl}_3$ , 500 MHz):  $\delta$  5.27 (d,  $J = 8.6$  Hz, 1H), 5.12–5.06 (m, 2H), 4.81 (s, 2H), 2.38 (s, 1H, OH), 2.13–1.96 (m, 4H), 1.72 (s, 3H), 1.69 (s, 3H), 1.61 (s, 3H), 1.56 (s, 6H), 0.88 (s, 9H), 0.10 (s, 3H), 0.09 (s, 3H);  $^{13}\text{C NMR}$  ( $\text{CDCl}_3$ , 500 MHz):  $\delta$  152.5, 138.7, 132.4, 125.1, 123.5, 92.6, 81.5, 73.2, 71.9, 71.6, 67.4, 65.0, 60.1, 53.7, 32.5, 30.6, 30.4, 26.3, 25.7, 23.2, 18.2, 17.7, –4.4, –4.6; **HRMS** (ESI) calcd for  $\text{C}_{27}\text{H}_{40}\text{O}_4\text{NaSi}$   $[\text{M}+\text{Na}]^+$  479.2594, found 479.2601.

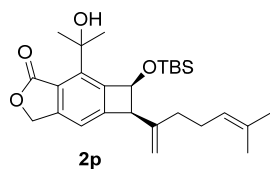

**2p**: white solid; 28 mg (62% yield); Purification: Flash Chromatography ( $\text{SiO}_2$ , hexanes–EtOAc, 10:1  $\rightarrow$  6:1)  $^1\text{H NMR}$  ( $\text{CDCl}_3$ , 500 MHz):  $\delta$  7.09 (s, 1H), 6.12 (s, 1H, OH), 5.35–5.26 (m, 2H), 5.04 (s, 1H), 5.11–5.05 (m, 1H), 4.99 (s, 1H), 4.95 (s, 1H), 3.79 (s, 1H), 2.23–2.09 (m, 2H), 2.07–1.98 (m, 2H), 1.80 (s, 3H), 1.68 (s, 6H), 1.59 (s, 3H), 0.92 (s, 9H), 0.18 (s, 3H), 0.14 (s, 3H);  $^{13}\text{C NMR}$  ( $\text{CDCl}_3$ , 500 MHz):  $\delta$  173.4, 153.3, 150.4, 148.4, 146.1, 143.4, 132.2, 123.4, 121.4, 115.6, 112.1, 75.9, 72.3, 70.0, 59.4, 34.0, 30.9, 28.6, 26.5, 25.8, 25.6, 17.7, –3.7, –5.2; **HRMS** (ESI) calcd for  $\text{C}_{27}\text{H}_{41}\text{O}_4\text{Si}$   $[\text{M}+\text{H}]^+$  457.2774, found 457.2779.

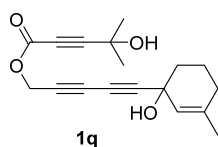

**1q**: colorless oil;  $^1\text{H NMR}$  ( $\text{CDCl}_3$ , 500 MHz):  $\delta$  5.73 (s, 1H), 4.81 (s, 2H), 1.98–1.86 (m, 3H), 1.85–1.71 (m, 3H), 1.69 (s, 3H), 1.56 (s, 6H);  $^{13}\text{C NMR}$  ( $\text{CDCl}_3$ , 500 MHz):  $\delta$  152.5, 139.5, 123.7, 92.8, 83.9, 73.1, 72.3, 71.6, 67.0, 66.3, 64.9, 53.7, 37.2, 30.4, 29.6, 23.4, 19.2; **HRMS** (ESI) calcd for  $\text{C}_{18}\text{H}_{20}\text{O}_4\text{Na}$   $[\text{M}+\text{Na}]^+$  323.1259, found 323.1257.

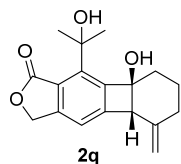

**2q**: white solid; 22 mg (56% yield); Purification: Flash Chromatography ( $\text{SiO}_2$ , hexanes–EtOAc, 4:1  $\rightarrow$  2:1);  $^1\text{H NMR}$  ( $\text{CDCl}_3$ , 500 MHz):  $\delta$  7.15 (s, 1H), 5.26 (s, 2H), 5.02 (s, 1H), 4.93 (s, 1H), 3.87 (s, 1H), 3.51 (br s, 1H, OH), 2.20–2.12 (m, 2H), 1.96–1.88 (m, 2H), 1.78 (s, 6H), 1.72–1.64 (m, 2H);  $^{13}\text{C NMR}$  ( $\text{CDCl}_3$ , 500 MHz):  $\delta$  184.2, 152.7, 150.5, 147.0, 145.7, 144.5, 120.8, 115.6, 112.5, 81.5, 73.1, 69.4, 57.6, 34.8, 30.5, 30.1, 28.5, 19.0; **HRMS** (ESI) calcd for  $\text{C}_{18}\text{H}_{20}\text{O}_4\text{Na}$   $[\text{M}+\text{Na}]^+$  323.1259, found 323.1268.

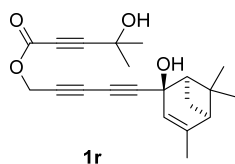

**1r**: yellow oil;  $^1\text{H NMR}$  ( $\text{CDCl}_3$ , 500 MHz):  $\delta$  5.29 (s, 1H), 4.79 (s, 2H), 3.11 (br s, 1H, OH), 2.55 (br s, 1H, OH), 2.52–2.47 (m, 1H), 2.33–2.28 (m, 1H), 1.98–1.95 (m, 1H), 1.71 (s, 3H), 1.59 (d,  $J = 9.0$  Hz, 1H), 1.53 (s, 6H), 1.33 (s, 3H), 1.00 (s, 3H);  $^{13}\text{C NMR}$  ( $\text{CDCl}_3$ , 500 MHz):  $\delta$  152.6, 148.6, 118.7, 93.1, 83.7, 73.1, 72.9, 72.3, 71.7, 67.1, 64.9, 53.7, 52.5, 47.6, 42.0, 36.3, 30.4, 26.9, 22.9, 22.6; **HRMS** (ESI) calcd for  $\text{C}_{21}\text{H}_{24}\text{O}_4\text{Na}$   $[\text{M}+\text{Na}]^+$  363.1572, found 363.1576.



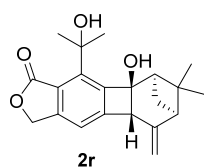

**2r**: pale-yellow solid; 50 mg (68% yield); Purification: Flash Chromatography (SiO<sub>2</sub>, hexanes–EtOAc, 4:1 → 2:1) <sup>1</sup>H NMR (CDCl<sub>3</sub>, 500 MHz): δ 7.15 (s, 1H), 5.25 (s, 2H), 4.97 (s, 1H), 4.85 (s, 1H), 4.01 (s, 1H), 3.48 (br s, 1H, OH), 2.6–2.52 (m, 2H), 2.25–2.17 (m, 2H), 1.73 (s, 6H), 1.38 (s, 3H), 1.06 (s, 3H), 0.57–0.52 (m, 1H); <sup>13</sup>C NMR (CDCl<sub>3</sub>, 500 MHz): δ 172.1, 155.5, 150.5, 149.1, 146.8, 144.8, 120.7, 113.9, 109.1, 83.9, 72.9, 69.4, 53.5, 53.3, 48.9, 41.3, 30.5, 30.3, 27.6, 26.9, 23.9; HRMS (ESI) calcd for C<sub>21</sub>H<sub>25</sub>O<sub>4</sub> [M+H]<sup>+</sup> 341.1766, found 341.1762.

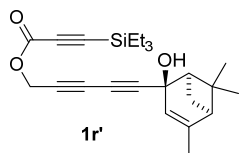

**1r'**: yellow oil; <sup>1</sup>H NMR (CDCl<sub>3</sub>, 500 MHz): δ 5.28 (s, 1H), 4.79 (s, 2H), 2.54–2.48 (m, 1H), 2.35–2.30 (m, 1H), 2.19 (br s, 1H, OH), 2.01–1.97 (m, 1H), 1.73 (d, *J* = 1.3 Hz, 3H), 1.61 (d, *J* = 9.6 Hz, 1H), 1.34 (s, 1H), 1.03–0.95 (m, 12H), 0.66 (q, *J* = 7.8 Hz, 6H); <sup>13</sup>C NMR (CDCl<sub>3</sub>, 500 MHz): δ 151.8, 148.5, 118.8, 94.7, 94.1, 83.5, 72.9, 72.4, 71.6, 67.2, 53.5, 52.6, 47.6, 41.6, 36.3, 26.9, 23.0, 22.6, 7.2, 3.7; HRMS (ESI) calcd for C<sub>24</sub>H<sub>32</sub>O<sub>4</sub>NaSi [M+Na]<sup>+</sup> 419.2018, found 419.2013.

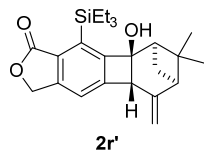

**2r'**: pale-yellow solid; 42 mg (46% yield); Purification: Flash Chromatography (SiO<sub>2</sub>, hexanes–EtOAc, 10:1 → 5:1) <sup>1</sup>H NMR (CDCl<sub>3</sub>, 500 MHz): δ 7.22 (s, 1H), 5.23 (s, 2H), 4.95 (s, 1H), 4.84 (s, 1H), 3.97 (s, 1H), 2.63–2.51 (m, 2H), 2.40 (s, 1H, OH), 2.21–2.13 (m, 1H), 1.40 (s, 3H), 1.13–1.04 (m, 3H), 1.08 (s, 3H), 1.02–0.93 (m, 3H), 0.89–0.83 (m, 9H), 0.49 (d, *J* = 10.9, 1H); <sup>13</sup>C NMR (CDCl<sub>3</sub>, 500 MHz): δ 171.8, 156.5, 152.9, 149.4, 148.5, 136.4, 130.0, 128.6, 115.5, 108.8, 84.9, 69.1, 54.3, 53.3, 48.6, 41.3, 27.5, 27.0, 23.9, 7.7, 3.1; HRMS (ESI) calcd for C<sub>24</sub>H<sub>32</sub>O<sub>4</sub>NaSi [M+Na]<sup>+</sup> 419.2018, found 419.2018.

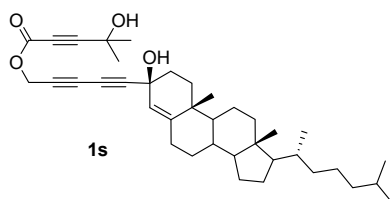

**1s**: <sup>1</sup>H NMR (CDCl<sub>3</sub>, 500 MHz): δ 5.23 (s, 1H), 4.82 (s, 2H), 2.60 (br s, 1H, OH), 2.46 (br s, 1H, OH), 2.18–2.11 (m, 1H), 2.04–1.95 (m, 3H), 1.95–1.88 (m, 1H), 1.86–1.76 (m, 3H), 1.64–1.65 (m, 4H), 1.57 (d, *J* = 3.3 Hz, 1H), 1.56 (s, 6H), 1.38–1.28 (m, 6H), 1.26–1.21 (m, 3H), 1.16–1.03 (m, 6H), 1.02 (s, 3H), 0.89 (d, *J* = 6.6 Hz, 3H), 0.85 (dd, *J* = 1.9, 4.7 Hz, 6H), 0.66 (s, 3H); <sup>13</sup>C NMR (CDCl<sub>3</sub>, 500 MHz): δ 152.6, 148.9, 121.8, 92.9, 83.6, 73.1, 72.3, 71.8, 67.4, 67.3, 64.9, 56.2, 55.9, 53.9, 53.7, 42.5, 39.7, 39.5, 37.5, 36.2, 35.8, 34.8, 34.5, 33.9, 32.6, 32.1, 30.6, 30.5, 30.4, 28.2, 28.0, 24.2, 23.8, 23.3, 22.8, 22.5, 21.1, 18.7, 18.5, 11.9; HRMS (ESI) calcd for C<sub>38</sub>H<sub>54</sub>O<sub>4</sub>Na [M+Na]<sup>+</sup> 597.3920, found 597.3923.

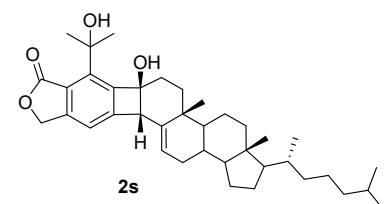

**2s**: white solid; 12 mg (42% yield); Purification: Flash Chromatography (SiO<sub>2</sub>, hexanes–EtOAc, 5:1 → 3:1); <sup>1</sup>H NMR (CDCl<sub>3</sub>, 500 MHz): δ 7.23 (s, 1H), 5.58–5.53 (m, 1H), 3.90 (s, 1H), 2.8–1.94 (m, 3H), 1.76 (d, *J* = 4.8 Hz, 6H), 1.71–1.64 (m, 3H), 1.55–1.48 (m, 7H), 1.42–1.24 (m, 6H), 1.15 (s, 3H), 1.13–1.05 (m, 6H), 1.02–0.95 (m, 3H), 0.91 (d, *J* = 6.4 Hz, 3H),

0.86 (dd,  $J = 2.6, 4.5$  Hz, 6H), 0.71 (s, 3H);  $^{13}\text{C NMR}$  ( $\text{CDCl}_3$ , 500 MHz):  $\delta$  172.2, 153.8, 150.2, 146.9, 141.4, 130.2, 128.5, 122.1, 117.0, 81.5, 72.8, 69.4, 56.9, 56.1, 53.9, 48.2, 42.5, 39.9, 39.5, 36.7, 36.2, 35.8, 32.9, 32.6, 32.2, 31.3, 30.5, 30.3, 28.3, 28.0, 24.1, 23.8, 22.8, 22.7, 22.5, 21.5, 18.7, 12.0; **HRMS** (ESI) calcd for  $\text{C}_{38}\text{H}_{55}\text{O}_4$  [ $\text{M}+\text{H}$ ] $^+$  575.4100, found 575.4088.

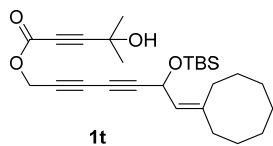

**1t**

**1t**: colorless oil;  $^1\text{H NMR}$  ( $\text{CDCl}_3$ , 500 MHz):  $\delta$  5.26 (d,  $J = 8.2$  Hz, 1H), 5.13 (d,  $J = 8.1$  Hz, 1H), 4.82 (s, 2H), 2.32 (s, 1H, OH), 2.26–2.18 (m, 1H), 2.18–2.10 (m, 3H), 1.72–1.58 (m, 4H), 1.56 (s, 6H), 1.52–1.39 (m, 6H), 0.88 (s, 9H), 0.12 (s, 3H), 0.10 (s, 3H);  $^{13}\text{C NMR}$  ( $\text{CDCl}_3$ , 500 MHz):  $\delta$  152.5, 144.8, 124.4, 92.6, 81.4, 73.2, 71.9, 71.5, 67.5, 65.0, 60.1, 53.8, 36.9, 30.4, 29.5, 27.1, 27.0, 26.4, 25.7, 25.5, 18.2, –4.4, –4.6; **HRMS** (ESI) calcd for  $\text{C}_{27}\text{H}_{40}\text{O}_4\text{NaSi}$  [ $\text{M}+\text{Na}$ ] $^+$  479.2594, found 479.2602.

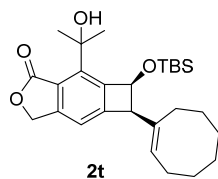

**2t**

**2t**: white solid; 37 mg (69% yield); Purification: Flash Chromatography ( $\text{SiO}_2$ , hexanes–EtOAc, 10:1  $\rightarrow$  6:1);  $^1\text{H NMR}$  ( $\text{CDCl}_3$ , 500 MHz):  $\delta$  7.08 (s, 1H), 6.17 (s, 1H, OH), 5.59 (t,  $J = 8.2$  Hz, 1H), 5.35–5.25 (m, 2H), 5.21 (s, 1H), 3.75 (s, 1H), 2.19–2.13 (m, 2H), 2.13–2.07 (m, 2H), 1.80 (s, 3H), 1.67 (s, 3H), 1.62–1.59 (m, 1H), 1.57–1.45 (m, 7H), 0.92 (s, 9H), 0.17 (s, 3H), 0.12 (s, 3H);  $^{13}\text{C NMR}$  ( $\text{CDCl}_3$ , 500 MHz):  $\delta$  173.5, 154.1, 150.3, 148.2, 143.5, 137.5, 128.3, 121.3, 115.9, 76.0, 72.3, 70.0, 60.7, 30.9, 30.1, 29.2, 28.5, 27.3, 26.4, 26.2, 26.2, 25.8, 17.9, –3.5, –5.2; **HRMS** (ESI) calcd for  $\text{C}_{27}\text{H}_{40}\text{O}_4\text{NaSi}$  [ $\text{M}+\text{Na}$ ] $^+$  479.2594, found 479.2601.

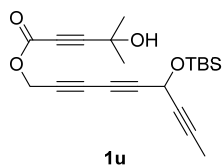

**1u**

**1u**: yellow oil;  $^1\text{H NMR}$  ( $\text{CDCl}_3$ , 500 MHz):  $\delta$  5.20–5.16 (m, 1H), 4.81 (s, 2H), 2.53 (s, 1H, OH), 1.83 (d,  $J = 2.2$  Hz, 3H), 1.55 (s, 6H), 0.89 (s, 9H), 0.15 (s, 3H), 0.14 (s, 3H);  $^{13}\text{C NMR}$  ( $\text{CDCl}_3$ , 500 MHz):  $\delta$  152.5, 92.8, 81.4, 78.1, 75.9, 73.1, 72.4, 71.4, 66.8, 65.0, 53.6, 53.4, 30.4, 25.6, 18.2, 3.6, –4.6; **HRMS** (ESI) calcd for  $\text{C}_{21}\text{H}_{28}\text{O}_4\text{NaSi}$  [ $\text{M}+\text{Na}$ ] $^+$  395.1655, found 395.1664.

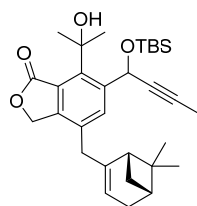

**2u'**

**2u'**: pale-yellow oil; 35 mg (76% yield, 1:1 diastereomeric mixture); Purification: Flash Chromatography ( $\text{SiO}_2$ , hexanes–EtOAc, 3:1);  $^1\text{H NMR}$  ( $\text{CDCl}_3$ , 500 MHz):  $\delta$  7.96 (s, 1H), 6.31 (s, 1H), 6.12–6.08 (m, 1H), 5.22 (s, 2H), 3.32–3.14 (m, 2H), 2.36–2.29 (m, 1H), 2.29–2.15 (m, 1H), 2.11–2.04 (m, 1H), 2.02–1.95 (m, 1H), 1.84 (s, 3H), 1.81 (s, 3H), 1.80 (s, 3H), 1.25–1.17 (m, 1H), 1.22 (s, 3H), 1.12 (dd,  $J = 9, 17$  Hz, 1H), 0.89 (s, 9H), 0.75 (s, 3H), 0.18 (s, 3H), 0.11–0.07 (m, 3H);  $^{13}\text{C NMR}$  ( $\text{CDCl}_3$ , 500 MHz) (all discernable signal for both isomer):  $\delta$  173.9, 147.8, 146.5, 146.4, 144.7, 144.5, 141.6, 136.2, 136.1, 131.8, 122.8, 118.9, 118.8, 82.7, 82.6, 81.0, 74.0, 68.3, 45.7, 45.5, 40.6, 40.5, 39.4, 39.2, 38.1, 31.7, 31.3, 26.1, 25.7, 20.8, 18.2, 3.7, –4.3, –4.8; **HRMS** (ESI) calcd for  $\text{C}_{31}\text{H}_{45}\text{O}_4\text{Si}$  [ $\text{M}+\text{H}$ ] $^+$  509.3087, found 509.3075.

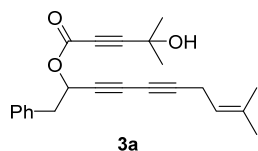

**3a:** yellow oil;  $^1\text{H NMR}$  ( $\text{CDCl}_3$ , 500 MHz):  $\delta$  7.34–7.28 (m, 2H), 7.28–7.22 (m, 3H), 5.60 (t,  $J = 5.4$  Hz, 1H), 5.15–5.09 (m, 1H), 3.15–3.04 (m, 2H), 2.96 (d,  $J = 5.0$  Hz, 2H), 2.40 (br s, 1H, OH), 1.71 (s, 3H), 1.62 (s, 3H), 1.56 (s, 6H);  $^{13}\text{C NMR}$  ( $\text{CDCl}_3$ , 500 MHz):  $\delta$  152.2, 135.0, 129.6, 128.5, 127.3, 116.7, 92.4, 81.1, 73.5, 72.2, 71.3, 66.7, 65.0, 63.7, 40.9, 30.5, 25.5, 23.9, 18.4, 17.7; **HRMS** (ESI) calcd for  $\text{C}_{23}\text{H}_{24}\text{O}_3\text{Na}$  [ $\text{M}+\text{Na}$ ] $^+$  371.1623, found 371.1609.

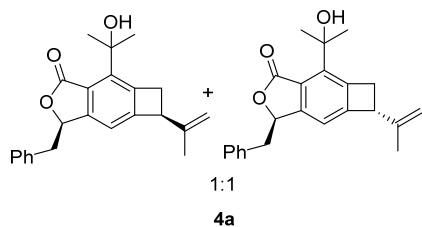

**4a:** 62% total yield; Purification: Column Chromatography ( $\text{SiO}_2$ , hexanes–EtOAc, 10:1  $\rightarrow$  6:1); **Diastereomer 1:** white solid; 16 mg;  $^1\text{H NMR}$  ( $\text{CDCl}_3$ , 500 MHz):  $\delta$  7.32–7.26 (m, 2H), 7.27–7.24 (m, 1H), 7.23–7.19 (m, 2H), 6.88 (s, 1H, OH), 6.32 (s, 1H), 5.71–5.63 (m, 1H), 4.83 (s, 1H), 4.79 (s, 1H), 4.00–3.96 (m, 1H), 3.57 (dd,  $J = 6.0, 8.5$  Hz, 1H), 3.18 (d,  $J = 6.3$  Hz, 2H), 3.10 (d,  $J = 13.5$  Hz, 1H), 1.76 (s, 3H), 1.61 (s, 3H), 1.57 (s, 3H);  $^{13}\text{C NMR}$  ( $\text{CDCl}_3$ , 500 MHz):  $\delta$  173.1, 155.2, 151.7, 145.9, 143.9, 140.5, 135.1, 129.6, 128.6, 127.2, 115.4, 110.9, 81.7, 71.8, 47.7, 41.3, 38.0, 30.1, 30.0, 20.3; **HRMS** (ESI) calcd for  $\text{C}_{23}\text{H}_{24}\text{O}_3\text{Na}$  [ $\text{M}+\text{Na}$ ] $^+$  371.1623, found 371.1618. **Diastereomer 2:** white solid; 16 mg;  $^1\text{H NMR}$  ( $\text{CDCl}_3$ , 500 MHz):  $\delta$  7.30–7.22 (m, 2H), 7.18 (d,  $J = 7.3$  Hz, 2H), 6.70 (s, 1H), 6.31 (s, 1H, OH), 5.65 (t,  $J = 6.2$  Hz, 1H), 4.86 (s, 1H), 4.79 (s, 1H), 3.94–3.90 (m, 1H), 3.55 (dd,  $J = 5.6, 8.4$  Hz, 1H), 3.30 (dd,  $J = 8.1, 5.3$  Hz, 2H), 3.15–3.03 (m, 2H), 1.77 (s, 3H), 1.59 (s, 3H), 1.56 (s, 3H);  $^{13}\text{C NMR}$  ( $\text{CDCl}_3$ , 500 MHz):  $\delta$  173.1, 154.9, 151.5, 145.8, 144.1, 140.4, 134.8, 129.7, 128.5, 127.3, 115.7, 110.8, 81.5, 71.8, 47.6, 41.2, 38.1, 30.1, 30.0, 20.3; **HRMS** (ESI) calcd for  $\text{C}_{23}\text{H}_{24}\text{O}_3\text{Na}$  [ $\text{M}+\text{Na}$ ] $^+$  371.1623, found 371.1627. All attempts to confirm to assign stereochemistry to each diastereomers by nOe failed.

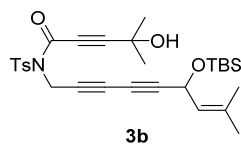

**3b:** colorless oil;  $^1\text{H NMR}$  ( $\text{CDCl}_3$ , 500 MHz):  $\delta$  7.97 (d,  $J = 8.1$  Hz, 2H), 7.34 (d,  $J = 8.1$  Hz, 2H), 5.27 (d,  $J = 7.2$  Hz, 1H), 5.08 (d,  $J = 8.1$  Hz, 1H), 4.94 (s, 2H), 2.44 (s, 3H), 1.74 (s, 3H), 1.68 (s, 3H), 1.54 (s, 6H), 0.90 (s, 9H), 0.12 (s, 3H), 0.11 (s, 3H);  $^{13}\text{C NMR}$  ( $\text{CDCl}_3$ , 500 MHz):  $\delta$  151.4, 145.6, 135.3, 135.1, 129.6, 128.9, 124.7, 99.1, 80.4, 74.5, 73.1, 69.4, 67.5, 65.2, 60.4, 36.9, 30.2, 25.8, 25.6, 21.7, 18.2, -4.5, -4.6; **HRMS** (ESI) calcd for  $\text{C}_{29}\text{H}_{39}\text{NO}_5\text{NaSiS}$  [ $\text{M}+\text{Na}$ ] $^+$  564.2216, found 564.2231.

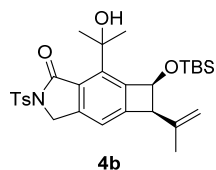

**4b:** white solid; 46 mg (72% yield); Purification: Flash Chromatography ( $\text{SiO}_2$ , hexanes–EtOAc, 4:1);  $^1\text{H NMR}$  ( $\text{CDCl}_3$ , 500 MHz):  $\delta$  7.98 (d,  $J = 8.2$  Hz, 2H), 7.32 (d,  $J = 8.1$  Hz, 2H), 7.10 (s, 1H), 6.26 (s, 1H, OH), 5.18 (s, 1H), 4.93 (s, 1H), 4.98 (s, 1H), 4.87 (s, 2H), 3.75 (s, 1H), 2.41 (s, 3H), 1.73 (s, 3H), 1.68 (s, 3H), 1.60 (s, 3H), 0.89 (s, 9H), 0.15 (s, 3H), 0.12 (s, 3H);  $^{13}\text{C NMR}$  ( $\text{CDCl}_3$ , 500 MHz):  $\delta$  168.9, 152.5, 148.2, 145.5, 145.1, 143.2, 141.9, 134.8, 129.8, 125.9, 117.2, 113.6, 75.8, 72.1, 60.1, 50.0, 31.0, 28.5, 25.7, 21.7, 20.3, 17.8, -3.7, -5.3; **HRMS** (ESI) calcd for  $\text{C}_{29}\text{H}_{40}\text{NO}_5\text{SiS}$  [ $\text{M}+\text{H}$ ] $^+$  542.2396, found 542.2385.

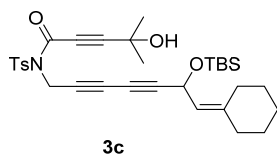

**3c:** yellow oil;  $^1\text{H NMR}$  ( $\text{CDCl}_3$ , 500 MHz):  $\delta$  7.97 (d,  $J$  = 8.1 Hz, 2H), 7.34 (d,  $J$  = 8.2 Hz, 2H), 5.23 (d,  $J$  = 7.2 Hz, 1H), 5.15 (d,  $J$  = 8.1 Hz, 1H), 4.84 (s, 2H), 2.44 (s, 3H), 2.30 (br s, 1H) 2.18–2.12 (m, 2H), 2.12–2.06 (m, 2H), 1.60–1.51 (m, 6H), 1.59–1.51 (m, 6H), 0.93–0.87 (m, 9H), 0.14–0.08 (m, 6H);  $^{13}\text{C NMR}$  ( $\text{CDCl}_3$ , 500 MHz):  $\delta$  151.4, 145.6, 143.0, 135.1, 129.6, 128.9, 121.4, 99.1, 80.7, 74.5, 73.1, 69.4, 67.3, 65.2, 59.5, 36.7, 30.2, 29.3, 28.1, 27.4, 26.5, 25.8, 21.7, 18.2, –4.4, –4.6; **HRMS** (ESI) calcd for  $\text{C}_{32}\text{H}_{43}\text{NO}_5\text{NaSiS}$  [ $\text{M}+\text{Na}$ ] $^+$  604.2529, found 604.2541.

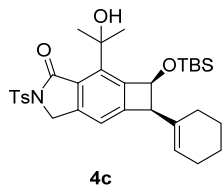

**4c:** white solid; 28 mg (56% yield); Purification: Flash Chromatography ( $\text{SiO}_2$ , hexanes–EtOAc, 4:1);  $^1\text{H NMR}$  ( $\text{CDCl}_3$ , 500 MHz):  $\delta$  7.98 (d,  $J$  = 8.1 Hz, 2H), 7.32 (d,  $J$  = 8.2 Hz, 2H), 7.08 (s, 1H), 6.25 (s, 1H, OH), 5.59 (s, 1H), 5.15 (s, 1H), 4.91–4.81 (m, 2H), 3.66 (s, 1H), 2.42 (s, 3H), 1.88–1.77 (m, 2H), 1.73 (s, 3H), 1.64–1.53 (m, 9H), 0.89 (s, 9H), 0.14 (s, 3H), 0.11 (s, 3H);  $^{13}\text{C NMR}$  ( $\text{CDCl}_3$ , 500 MHz):  $\delta$  168.8, 153.0, 148.0, 145.5, 144.9, 143.4, 134.8, 134.6, 129.8, 128.3, 125.7, 125.0, 117.2, 75.7, 72.1, 60.4, 50.0, 31.0, 28.6, 26.4, 25.8, 25.2, 22.7, 22.3, 21.7, 17.9, –3.7, –5.2; **HRMS** (ESI) calcd for  $\text{C}_{32}\text{H}_{44}\text{NO}_5\text{SiS}$  [ $\text{M}+\text{H}$ ] $^+$  582.2709, found 582.2723.

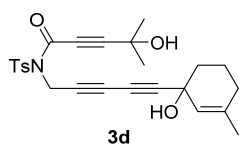

**3d:** colorless oil;  $^1\text{H NMR}$  ( $\text{CDCl}_3$ , 500 MHz):  $\delta$  7.95 (d,  $J$  = 8.2 Hz, 2H), 7.33 (d,  $J$  = 8.1 Hz, 2H), 5.43 (s, 1H), 4.81 (s, 2H), 3.05 (br s, 1H), 2.43 (s, 3H), 1.97–1.89 (m, 3H), 1.86–1.74 (m, 3H), 1.69 (s, 3H), 1.52 (s, 6H);  $^{13}\text{C NMR}$  ( $\text{CDCl}_3$ , 500 MHz):  $\delta$  151.4, 145.6, 139.5, 135.1, 129.6, 128.9, 123.8, 99.3, 82.9, 74.4, 73.8, 69.2, 67.1, 66.3, 65.2, 37.2, 36.9, 30.2, 29.7, 23.5, 21.7, 19.2; **HRMS** (ESI) calcd for  $\text{C}_{25}\text{H}_{27}\text{NO}_5\text{NaS}$  [ $\text{M}+\text{Na}$ ] $^+$  476.1521, found 476.1519.

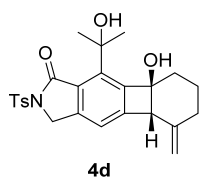

**4d:** white solid; 23 mg (42% yield); Purification: Flash Chromatography ( $\text{SiO}_2$ , hexanes–EtOAc, 4:1);  $^1\text{H NMR}$  ( $\text{CDCl}_3$ , 500 MHz):  $\delta$  8.00 (d,  $J$  = 7.5 Hz, 2H), 7.34 (d,  $J$  = 7.6, 2H), 7.13 (s, 1H), 5.00 (s, 1H), 4.91 (s, 1H), 4.84 (s, 2H), 3.83 (s, 1H), 3.19 (s, 1H, OH), 2.43 (s, 3H), 2.30–2.22 (m, 1H), 2.18–2.07 (m, 2H), 1.94–1.85 (m, 1H), 1.70 (s, 3H), 1.69 (s, 3H), 1.66–1.61 (m, 2H);  $^{13}\text{C NMR}$  ( $\text{CDCl}_3$ , 500 MHz):  $\delta$  167.6, 152.2, 145.6, 145.4, 145.1, 144.1, 139.6, 135.1, 129.8, 128.3, 128.0, 117.1, 112.5, 109.9, 109.6, 81.9, 58.0, 49.5, 34.7, 30.5, 28.4, 21.7, 19.0; **HRMS** (ESI) calcd for  $\text{C}_{27}\text{H}_{26}\text{NO}_5\text{S}$  [ $\text{M}+\text{H}$ ] $^+$  476.1532, found 476.1531.

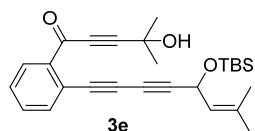

**3e:** yellow oil;  $^1\text{H NMR}$  ( $\text{CDCl}_3$ , 500 MHz):  $\delta$  8.00 (d,  $J$  = 8.1 Hz, 1H), 7.60 (d,  $J$  = 8.2 Hz, 1H), 7.49 (t,  $J$  = 6.3 Hz, 1H), 7.43 (t,  $J$  = 6.5 Hz, 1H), 5.33–5.28 (m, 1H), 5.18 (d,  $J$  = 8.3 Hz, 1H), 2.44 (br s, 1H, OH), 1.73 (s, 3H), 1.69 (s, 3H), 1.64 (s, 6H), 0.90 (s, 9H), 0.14 (s, 3H), 0.12 (s, 3H);  $^{13}\text{C NMR}$  ( $\text{CDCl}_3$ , 500 MHz):  $\delta$  176.7, 139.0, 135.6, 135.0, 132.6, 131.2, 128.8, 124.8, 121.7, 98.9, 86.0, 80.9, 79.9, 76.3, 68.7, 65.3, 60.7, 30.6, 25.8, 25.6, 18.3, –4.5, –4.6; **HRMS** (ESI) calcd for  $\text{C}_{27}\text{H}_{35}\text{O}_3\text{Si}$  [ $\text{M}+\text{NH}$ ] $^+$  435.2355, found 435.2362.

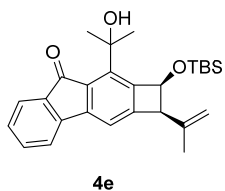

**4e:** yellow solid; 42 mg (87% yield, 6:1 *dr*); Purification: Flash Chromatography (SiO<sub>2</sub>, hexanes–EtOAc, 10:1); **Major diastereomer:** <sup>1</sup>H NMR (CDCl<sub>3</sub>, 500 MHz): δ 7.59 (d, *J* = 7.3 Hz, 1H), 7.47–7.40 (m, 2H), 7.27–7.23 (m, 2H), 7.18 (s, 1H), 6.26 (s, 1H, OH), 5.17 (s, 1H), 4.96 (s, 1H), 4.93 (s, 1H), 3.72 (s, 1H), 1.76 (s, 3H), 1.74 (s, 3H), 1.63 (s, 3H), 0.92 (s, 9H), 0.17 (s, 3H), 0.15 (s, 3H); <sup>13</sup>C NMR (CDCl<sub>3</sub>, 500 MHz): δ 196.7, 153.7, 149.3, 148.6, 144.2, 143.9, 142.3, 135.1, 133.5, 129.2, 124.6, 119.8, 116.5, 114.6, 113.5, 75.9, 72.3, 59.9, 30.5, 28.3, 25.8, 20.3, 17.9, –3.6, –5.2; **HRMS** (ESI) calcd for C<sub>27</sub>H<sub>35</sub>O<sub>3</sub>Si [M+H]<sup>+</sup> 435.2355, found 435.2341.

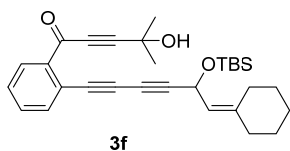

**3f:** yellow oil; <sup>1</sup>H NMR (CDCl<sub>3</sub>, 500 MHz): δ 8.00 (d, *J* = 7.3 Hz, 1H), 7.61 (d, *J* = 7.8 Hz, 1H), 7.50 (t, *J* = 6.8 Hz, 1H), 7.44 (t, *J* = 7.6 Hz, 1H), 5.26 (s, 2H), 2.30 (s, 1H, OH), 2.21–2.14 (m, 2H), 2.13–2.07 (m, 2H), 1.64 (s, 6H), 1.61–1.49 (m, 6H), 0.90 (s, 9H), 0.14 (s, 3H), 0.12 (s, 3H); <sup>13</sup>C NMR (CDCl<sub>3</sub>, 500 MHz): δ 176.7, 142.8, 139.1, 135.7, 132.6, 131.1, 128.8, 121.5, 98.9, 86.4, 81.0, 76.3, 68.5, 65.3, 59.8, 36.8, 30.7, 29.4, 28.1, 27.4, 26.5, 25.8, 18.3, –4.4, –4.6; **HRMS** (ESI) calcd for C<sub>30</sub>H<sub>38</sub>O<sub>3</sub>NaSi [M+Na]<sup>+</sup> 497.2488, found 497.2493.

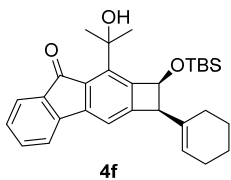

**4f:** yellow solid; 36 mg (76% yield, 10:1 *dr*); Purification: Flash Chromatography (SiO<sub>2</sub>, hexanes–EtOAc, 10:1); **Major diastereomer:** <sup>1</sup>H NMR (CDCl<sub>3</sub>, 500 MHz): δ 7.56 (d, *J* = 7.2 Hz, 1H), 7.47–7.39 (m, 2H), 7.27–7.23 (m, 1H), 7.18 (s, 1H), 6.27 (s, 1H, OH), 5.95 (s, 1H), 5.15–5.13 (m, 1H), 3.63 (s, 1H), 2.11–2.04 (m, 2H), 1.95–1.89 (m, 2H), 1.76 (s, 3H), 1.63 (s, 3H), 1.65–1.58 (m, 4H), 0.92 (s, 9H), 0.17 (s, 3H), 0.14 (s, 3H); <sup>13</sup>C NMR (CDCl<sub>3</sub>, 500 MHz): δ 196.8, 154.3, 149.2, 148.5, 144.3, 144.1, 135.1, 134.8, 133.6, 129.8, 129.2, 124.8, 124.5, 119.8, 114.7, 75.9, 72.4, 60.3, 30.5, 28.3, 26.4, 25.8, 25.3, 22.8, 22.4, 17.9 – 3.7, –5.1; **HRMS** (ESI) calcd for C<sub>30</sub>H<sub>39</sub>O<sub>3</sub>Si [M+H]<sup>+</sup> 475.2668, found 475.2658.

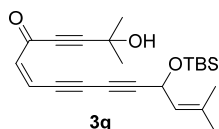

**3g:** yellow oil; <sup>1</sup>H NMR (CDCl<sub>3</sub>, 500 MHz): δ 6.44 (d, *J* = 11.9 Hz, 1H), 6.35 (d, *J* = 11.6 Hz, 1H), 5.27 (d, *J* = 7.6 Hz, 1H), 5.17 (d, *J* = 8.3 Hz, 1H), 2.20 (s, 1H, OH), 1.73 (s, 3H), 1.68 (s, 3H), 1.60 (s, 6H), 0.89 (s, 9H), 0.11 (s, 3H), 0.10 (s, 3H); <sup>13</sup>C NMR (CDCl<sub>3</sub>, 500 MHz): δ 174.7, 139.7, 135.5, 124.4, 121.9, 98.0, 89.9, 86.9, 81.4, 74.6, 68.2, 65.2, 60.7, 30.6, 25.7, 25.6, 18.3, –4.6, –4.7; **HRMS** (ESI) calcd for C<sub>23</sub>H<sub>32</sub>O<sub>3</sub>NaSi [M+Na]<sup>+</sup> 407.2018, found 407.2008.

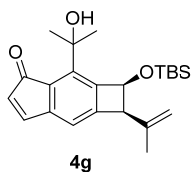

**4g:** yellow oil; 36 mg (56% yield, 10:1 *dr*); Purification: Flash Chromatography (SiO<sub>2</sub>, hexanes–EtOAc, 10:1); The major diastereomer could be completely separated from minor; <sup>1</sup>H NMR (CDCl<sub>3</sub>, 500 MHz): δ 7.44 (d, *J* = 5.8 Hz, 1H), 6.71 (s, 1H, OH), 5.87 (s, 1H), 5.81 (d, *J* = 5.8 Hz, 1H), 5.09 (s, 1H), 4.84 (s, 1H), 4.89 (s, 1H), 3.65 (s, 1H), 1.70 (s, 6H), 1.58 (s, 3H), 0.92 (s, 9H), 0.16 (s, 3H), 0.14 (s, 3H); <sup>13</sup>C NMR (CDCl<sub>3</sub>, 500 MHz): δ 201.2, 152.3, 150.5, 148.3, 148.2, 144.3, 142.3, 126.7, 125.8, 117.4, 113.4, 75.8, 72.3, 59.8, 30.4, 28.1, 25.8, 20.2, 17.9, –3.7, –5.2; **HRMS** (ESI) calcd for C<sub>23</sub>H<sub>32</sub>O<sub>3</sub>NaSi [M+Na]<sup>+</sup> 407.2018, found 407.2008.

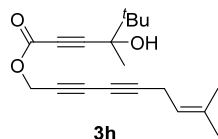

**3h**: colorless oil;  $^1\text{H NMR}$  ( $\text{CDCl}_3$ , 500 MHz):  $\delta$  5.13 (t,  $J$  = 7.3 Hz, 1H), 4.79 (s, 2H), 2.96 (d,  $J$  = 6.8 Hz, 1H), 2.11 (br s, 1H, OH), 1.70 (s, 3H), 1.62 (s, 3H), 1.48 (s, 3H), 1.05 (s, 9H);  $^{13}\text{C NMR}$  ( $\text{CDCl}_3$ , 500 MHz):  $\delta$  152.5, 135.4, 116.7, 92.2, 80.9, 75.2, 74.1, 72.5, 68.4, 63.7, 53.8, 38.3, 25.5, 24.9, 24.1, 18.4, 17.7; **HRMS** (ESI) calcd for  $\text{C}_{19}\text{H}_{25}\text{O}_3$   $[\text{M}+\text{H}]^+$  301.1804, found 301.1816.

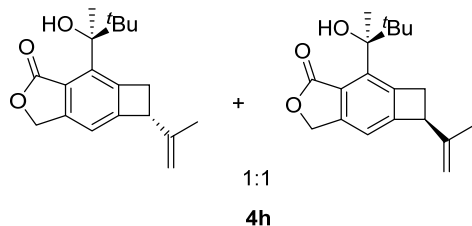

**4h**: 87% total yield; Purification: Column Chromatography ( $\text{SiO}_2$ , hexanes–EtOAc, 10:1  $\rightarrow$  6:1); **Diastereomer 1**: white solid; 18 mg;  $^1\text{H NMR}$  ( $\text{CDCl}_3$ , 500 MHz):  $\delta$  7.17 (s, 1H, OH), 7.12 (s, 1H), 5.31 (s, 2H), 4.84 (d,  $J$  = 7.1 Hz, 2H), 3.99–3.95 (m, 1H), 3.58 (dd,  $J$  = 5.6, 8.3 Hz, 1H), 3.21 (dd,  $J$  = 2.6, 11.3 Hz), 1.77 (s, 3H), 1.60 (s, 3H), 0.97 (s, 9H);  $^{13}\text{C NMR}$  ( $\text{CDCl}_3$ , 500 MHz):  $\delta$  174.3, 154.5, 148.3, 145.4, 144.0, 143.5, 122.9, 115.1, 111.0, 80.9, 69.9, 46.8, 41.7, 39.5, 25.7, 24.4, 20.2. **HRMS** (ESI) calcd for  $\text{C}_{19}\text{H}_{25}\text{O}_3$   $[\text{M}+\text{H}]^+$  301.1804, found 301.1807. **Diastereomer 2**: white solid; 20 mg;  $^1\text{H NMR}$  ( $\text{CDCl}_3$ , 500 MHz):  $\delta$  7.17 (s, 1H, OH), 7.11 (s, 1H), 5.35–5.27 (m, 2H), 4.86–4.81 (m, 2H), 3.99–3.95 (m, 1H), 3.67 (dd,  $J$  = 5.8, 7.9 Hz, 1H), 3.13 (dd,  $J$  = 2.8, 11.2 Hz), 1.77 (s, 3H), 1.59 (s, 3H), 0.97 (s, 9H);  $^{13}\text{C NMR}$  ( $\text{CDCl}_3$ , 500 MHz):  $\delta$  174.3, 154.6, 148.3, 145.4, 144.2, 143.7, 122.9, 115.1, 111.0, 80.8, 69.9, 46.8, 41.8, 39.2, 25.8, 24.4, 20.2; **HRMS** (ESI) calcd for  $\text{C}_{19}\text{H}_{25}\text{O}_3$   $[\text{M}+\text{H}]^+$  301.1804, found 301.1801. All attempts to confirm to assign stereochemistry to each diastereomers by nOe failed.

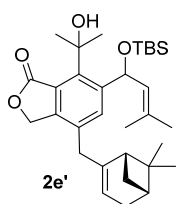

**2e'**: colorless oil; 24 mg (76% yield, 1:1 diastereomeric mixture); Purification: Flash Chromatography ( $\text{SiO}_2$ , hexanes–EtOAc, 4:1);  $^1\text{H NMR}$  (both isomers) ( $\text{CDCl}_3$ , 500 MHz):  $\delta$  7.79 (s, 1H), 7.60 (s, 1H), 6.39 (s, 2H), 6.36 (s, 2H), 6.02 (d,  $J$  = 4.4 Hz, 1H), 6.00 (d,  $J$  = 4.5 Hz, 2H), 5.21–5.19 (m, 4H), 3.29–3.17 (m, 4H), 2.37–2.31 (m, 2H), 2.27–2.18 (m, 4H), 2.11–2.06 (m, 2H), 2.00–1.95 (m, 2H), 1.86 (s, 6H), 1.78 (s, 6H), 1.73–1.68 (m, 12H), 1.23 (s, 6H), 1.14–1.09 (m, 2H), 0.84 (s, 18H), 0.76 (s, 3H), 0.75 (s, 3H), 0.09–0.06 (m, 6H), –0.10 (s, 3H), –0.12 (s, 3H);  $^{13}\text{C NMR}$  ( $\text{CDCl}_3$ , 500 MHz) (all discernable signal for both isomer):  $\delta$  174.0, 147.0, 147.4, 147.2, 147.1, 144.7, 144.5, 144.3, 144.2, 137.0, 136.9, 134.1, 131.5, 129.5, 129.4, 122.8, 122.7, 119.0, 118.7, 111.4, 73.6, 68.8, 68.6, 68.3, 68.2, 45.8, 45.6, 40.6, 40.5, 39.4, 39.2, 38.1, 31.7, 31.4, 31.3, 31.2, 26.2, 25.9, 25.8, 20.9, 20.8, 19.0, 18.1, –4.1, –4.3, –4.4; ; **HRMS** (ESI) calcd for  $\text{C}_{32}\text{H}_{48}\text{O}_4\text{NaSi}$   $[\text{M}+\text{Na}]^+$  547.3220, found 547.3197.

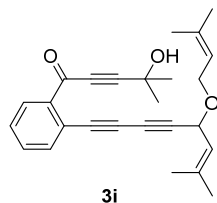

**3i**: yellow oil;  $^1\text{H NMR}$  ( $\text{CDCl}_3$ , 500 MHz):  $\delta$  8.01 (d,  $J$  = 7.6 Hz, 1H), 7.61 (d,  $J$  = 7.8 Hz, 1H), 7.51 (t,  $J$  = 7.4 Hz, 1H), 7.45 (t,  $J$  = 7.5, 1H), 5.38 (m, 2H), 4.90 (d,  $J$  = 8.6 Hz, 1H), 4.18 (dd,  $J$  = 6.8, 4.7 Hz, 1H), 4.02 (dd,  $J$  = 7.4, 3.6 Hz, 1H), 1.76 (s, 3H), 1.75 (s, 3H), 1.71 (s, 6H), 1.64 (s, 6H);  $^{13}\text{C NMR}$  ( $\text{CDCl}_3$ , 500 MHz):  $\delta$  176.6, 139.1, 138.3, 135.7, 132.6, 131.3, 128.9, 121.8, 121.6, 120.4, 98.8, 84.2, 80.9, 79.7, 76.2, 70.0, 65.6, 65.3, 64.7, 30.6, 26.1, 25.8, 25.7, 18.4, 18.2; **HRMS** (ESI) calcd for  $\text{C}_{26}\text{H}_{29}\text{O}_3$   $[\text{M}+\text{H}]^+$  389.2117, found 389.2121.

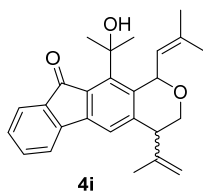

4i

**4i:** yellow oil; 24 mg (28% yield, 1:1 diastereomeric mixture); formed along with **4i'**; Purification: Column Chromatography (SiO<sub>2</sub>, hexanes–EtOAc, 20:1 → 10:1); **<sup>1</sup>H NMR** (CDCl<sub>3</sub>, 500 MHz): δ 7.60 (d, *J* = 7.8 Hz, 2H), 7.48 (t, *J* = 6.7 Hz, 1H), 7.31 (s, 1H), 7.29–7.26 (m, 2H), 7.24 (s, 1H), 6.06 (d, *J* = 6.9 Hz, 1H), 6.01 (d, *J* = 9.6 Hz, 1H), 5.25–5.19 (m, 2H), 5.13 (s, 1H), 5.00–4.98 (m, 1H), 4.96 (s, 1H), 4.87 (s, 1H), 4.14–4.09 (m, 1H), 4.02–3.96 (m, 1H), 3.83–3.77 (m, 1H), 3.67–3.56 (m, 3H), 1.93–1.90 (m, 3H), 1.87 (s, 3H), 1.80–1.77 (m, 9H), 1.71–1.68 (m, 6H), 1.64 (s, 6H), 1.58 (s, 1H); **<sup>13</sup>C NMR** (CDCl<sub>3</sub>, 500 MHz): δ 196.9, 193.1, 146.5, 147.6, 146.1, 145.9, 144.6, 144.2, 143.8, 143.1, 142.5, 140.2, 139.5, 136.7, 135.0, 134.5, 134.2, 133.9, 129.1, 126.7, 126.2, 124.7, 120.6, 120.1, 119.6, 118.2, 115.1, 111.9, 85.9, 78.2, 74.5, 71.1, 64.8, 63.1, 49.5, 48.1, 30.5, 30.1, 28.5, 27.1, 26.0, 23.2, 19.9, 18.8, 18.0; **HRMS** (ESI) calcd for C<sub>26</sub>H<sub>29</sub>O<sub>3</sub> [M+H]<sup>+</sup> 389.2117, found 389.2123.

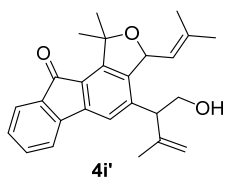

4i'

**4i':** yellow oil; 24 mg (28% yield); formed along with **4i**; Purification: Column Chromatography (SiO<sub>2</sub>, hexanes–EtOAc, 20:1 → 10:1); **<sup>1</sup>H NMR** (CDCl<sub>3</sub>, 500 MHz): δ 7.60 (d, *J* = 7.2 Hz, 1H), 7.46–7.43 (m, 2H), 7.27–7.23 (m, 2H), 6.06 (d, *J* = 6.6 Hz, 1H), 5.25 (d, *J* = 6.7 Hz, 1H), 5.04 (s, 1H), 4.91 (s, 1H), 3.97 (dd, *J* = 3.8, 6.8 Hz, 1H), 3.79–3.72 (m, 2H), 1.88 (s, 3H), 1.79 (s, 3H), 1.78 (s, 3H), 1.72 (s, 3H), 1.66 (s, 3H); **<sup>13</sup>C NMR** (CDCl<sub>3</sub>, 500 MHz): δ 196.8, 151.6, 145.2, 144.6, 144.3, 143.2, 139.9, 139.3, 135.0, 133.9, 130.6, 129.1, 127.2, 124.7, 120.7, 119.6, 116.0, 74.7, 71.1, 62.7, 48.6, 30.7, 30.4, 25.6, 20.1, 18.8; **HRMS** (ESI) calcd for C<sub>26</sub>H<sub>29</sub>O<sub>3</sub> [M+H]<sup>+</sup> 389.2117, found 389.2131.

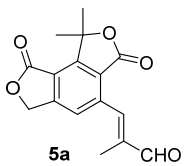

5a

**5a:** white solid; 22 mg (72% yield); Purification: Flash Chromatography (SiO<sub>2</sub>, hexanes–EtOAc 5:1 → 2:1); **<sup>1</sup>H NMR** (CDCl<sub>3</sub>, 500 MHz): δ 9.76 (s, 1H), 8.27 (s, 1H), 7.69 (s, 1H), 5.51 (s, 1H), 5.29 (s, 1H), 2.06 (s, 3H), 1.89 (s, 6H); **<sup>13</sup>C NMR** (CDCl<sub>3</sub>, 500 MHz): δ 194.8, 167.8, 167.6, 155.2, 152.8, 142.8, 141.2, 140.7, 125.4, 123.1, 120.2, 85.7, 70.3, 25.7, 11.3; **HRMS** (ESI) calcd for C<sub>16</sub>H<sub>15</sub>O<sub>3</sub> [M+H]<sup>+</sup> 389.2117, found 389.2131.

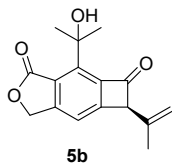

5b

**5b:** white solid; 53 mg (82% yield); Purification: Flash Chromatography (SiO<sub>2</sub>, hexanes–EtOAc, 5:1 → 2:1); **<sup>1</sup>H NMR** (CDCl<sub>3</sub>, 500 MHz): δ 7.53 (s, 1H), 6.11 (s, 1H), 5.43 (s, 2H), 5.00 (s, 1H), 4.81 (s, 1H), 4.73 (s, 1H), 1.85 (s, 3H), 1.78 (s, 3H), 1.77 (s, 3H); **<sup>13</sup>C NMR** (CDCl<sub>3</sub>, 500 MHz): δ 186.3, 172.3, 159.7, 155.3, 150.9, 145.4, 139.7, 123.8, 116.3, 113.4, 72.1, 70.1, 69.0, 30.2, 30.1, 21.3; **HRMS** (ESI) calcd for C<sub>16</sub>H<sub>17</sub>O<sub>4</sub> [M+H]<sup>+</sup> 273.1127, found 273.1133.

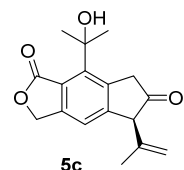

5c

**5c:** colorless oil; 12 mg (55% yield); Purification: Flash Chromatography (SiO<sub>2</sub>, hexanes–EtOAc, 5:1 → 3:1); **<sup>1</sup>H NMR** (CDCl<sub>3</sub>, 500 MHz): δ 7.50 (s, 1H), 5.32 (s, 2H), 4.98 (s, 1H), 4.82 (s, 1H), 4.70 (s, 1H), 3.31 (s, 2H), 1.87 (s, 3H), 1.80 (s, 3H), 1.79 (s, 3H); **<sup>13</sup>C NMR** (CDCl<sub>3</sub>, 500 MHz): δ 185.6, 168.3, 159.3, 155.3, 149.4, 147.1, 140.2, 123.5, 116.3, 113.0, 77.0, 68.8, 68.3, 50.4, 25.2, 24.9, 21.4; **HRMS** (ESI) calcd for C<sub>17</sub>H<sub>18</sub>O<sub>4</sub>Na [M+H]<sup>+</sup> 273.1127, found 273.1133.

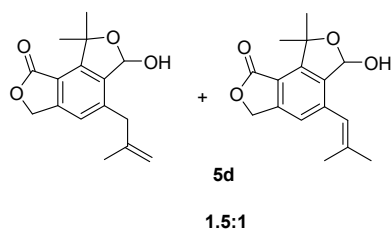

**5d:** colorless oil; 35 mg (86% yield, inseparable mixture (1.5:1) of isomeric alkenes); Purification: Flash Chromatography (SiO<sub>2</sub>, hexanes–EtOAc, 5:1 → 3:1); <sup>1</sup>H NMR (CDCl<sub>3</sub>, 500 MHz): **Major isomer:** δ 7.24 (s, 1H), 6.54 (d, *J* = 5.7 Hz, 1H), 5.31 (s, 2H), 4.91 (s, 1H), 4.69 (s, 1H), 3.88 (d, *J* = 5.6 Hz, 1H, OH), 3.66 (d, *J* = 15.4 Hz, 1H), 3.45 (d, *J* = 15.7, 1H), 1.79 (s, 3H), 1.72 (s, 3H), 1.70 (s, 3H); **Minor isomer:** δ 7.28 (s, 1H), 6.48 (s, 1H), 6.46 (d, *J* = 5.2 Hz, 1H), 5.33 (s, 2H), 3.76 (d, *J* = 5.1 Hz, 1H, OH), 1.96 (s, 3H), 1.88 (s, 3H), 1.79 (s, 3H), 1.69 (s, 3H); <sup>13</sup>C NMR (CDCl<sub>3</sub>, 500 MHz) (all discernable signal for both isomer): δ 169.5, 169.4, 149.5, 149.1, 147.2, 146.9, 142.1, 143.7, 139.3, 138.6, 122.4, 121.6, 120.6, 117.4, 113.6, 99.1, 98.8, 87.1, 87.0, 69.9, 69.8, 40.6, 29.3, 27.5, 27.1, 22.5, 20.0; **HRMS** (ESI) calcd for C<sub>16</sub>H<sub>19</sub>O<sub>4</sub> [M+H]<sup>+</sup> 275.1283, found 275.1281.

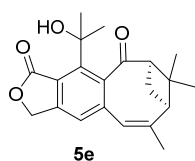

**5e:** colorless oil; 35 mg (81% yield); Purification: Flash Chromatography (SiO<sub>2</sub>, hexanes–EtOAc, 4:1); <sup>1</sup>H NMR (CDCl<sub>3</sub>, 500 MHz): δ 7.23 (s, 1H), 7.22 (s, 1H), 6.11 (s, 2H), 2.94–2.88 (m, 2H), 2.87–2.82 (m, 2H), 2.65–2.59 (m, 1H), 2.25 (d, *J* = 10.8 Hz, 1H), 2.00 (s, 3H), 1.68 (s, 3H), 1.67 (s, 3H), 1.56 (s, 3H), 1.44 (s, 3H); <sup>13</sup>C NMR (CDCl<sub>3</sub>, 500 MHz): δ 201.0, 173.5, 165.9, 150.9, 148.7, 140.8, 131.4, 127.7, 122.3, 121.4, 71.9, 50.5, 39.9, 30.2, 29.9, 27.3, 26.6, 22.0, 21.8; **HRMS** (ESI) calcd for C<sub>21</sub>H<sub>25</sub>O<sub>4</sub> [M+H]<sup>+</sup> 341.1753, found 341.1766.



# $^1\text{H}$ , $^{13}\text{C}$ NMRs, and Selected nOE Spectra

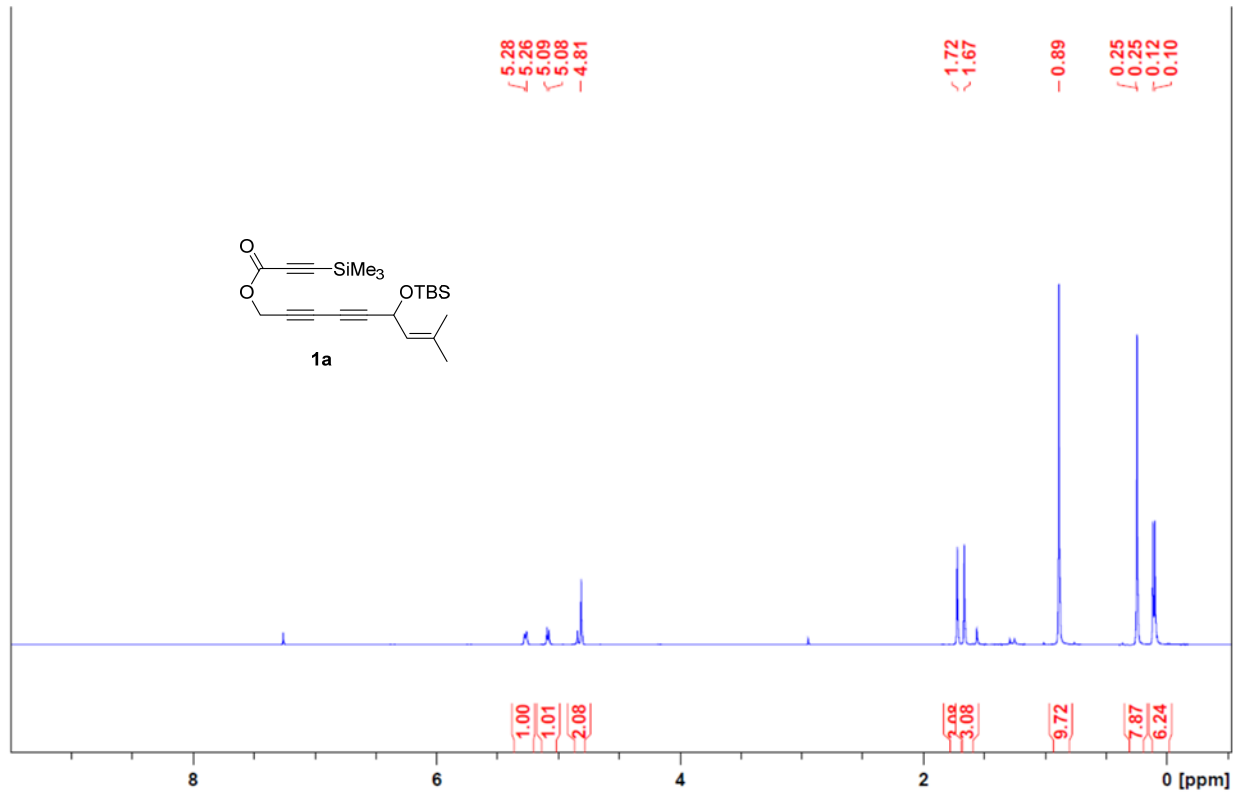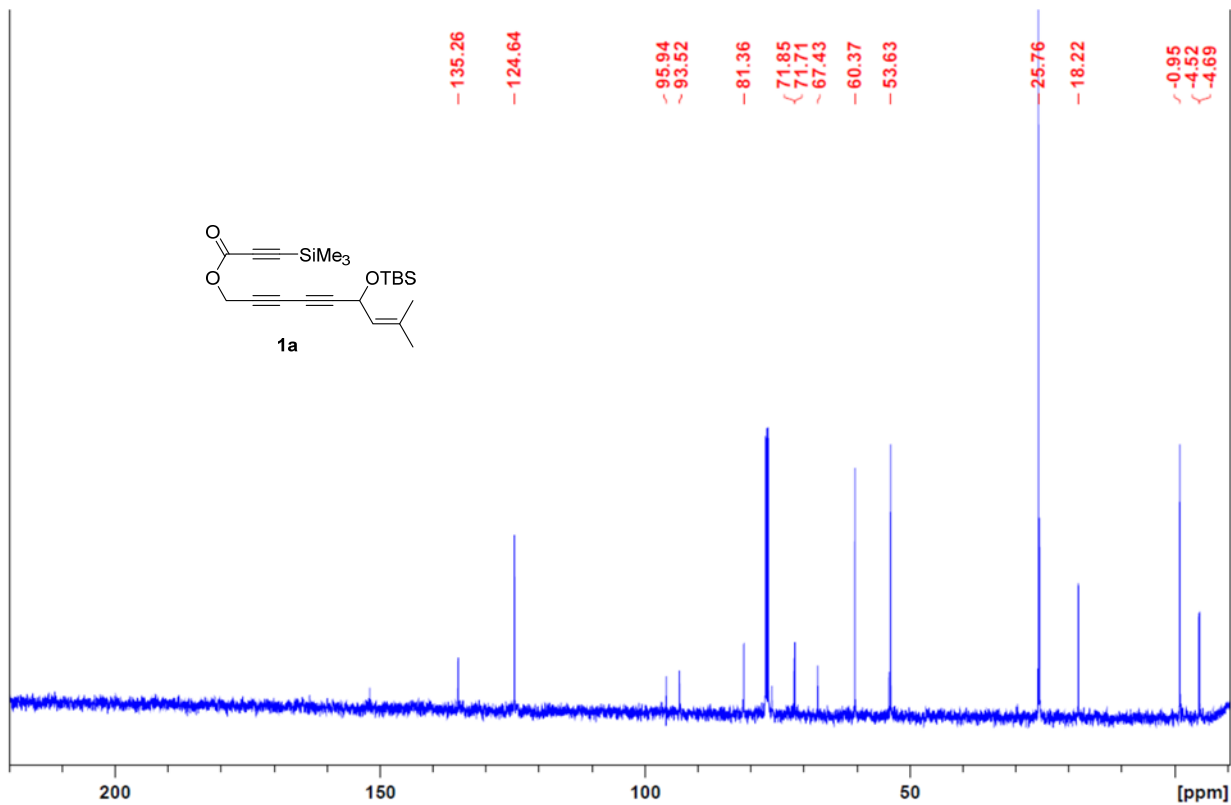



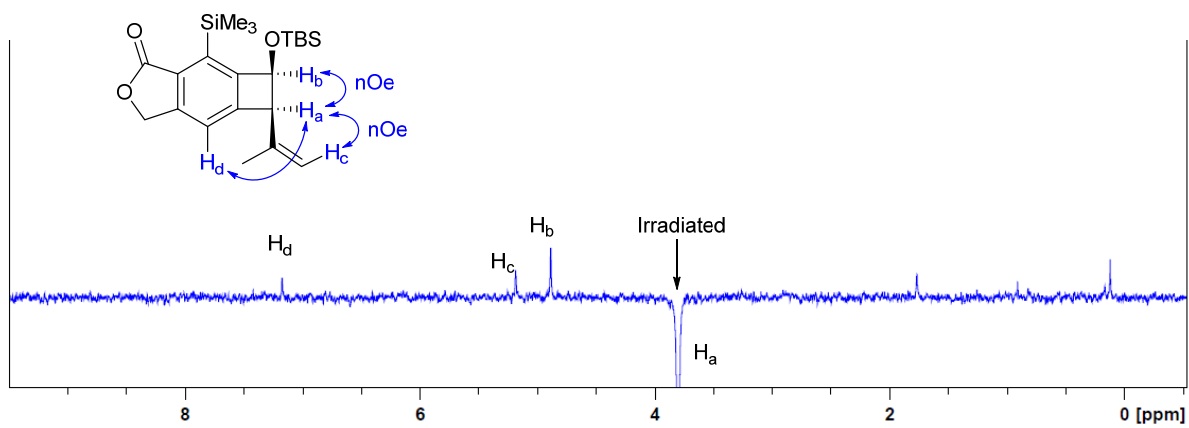

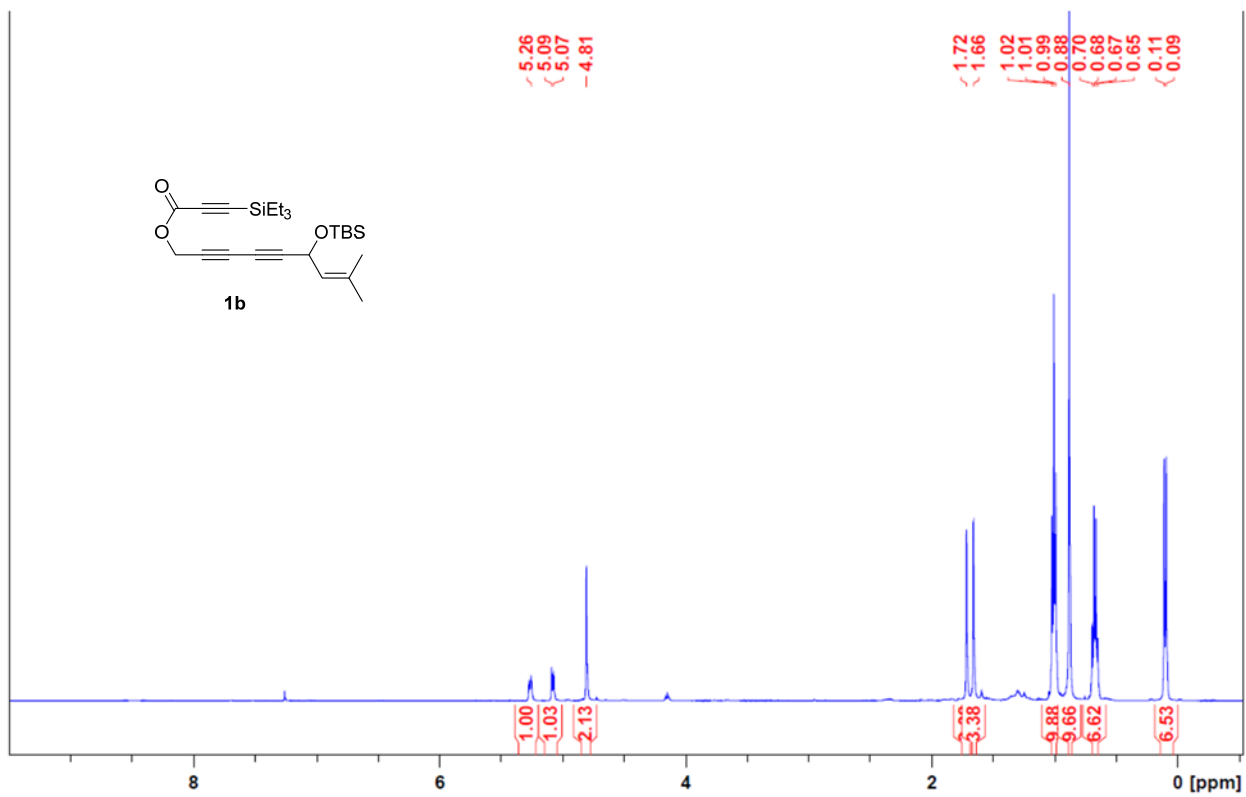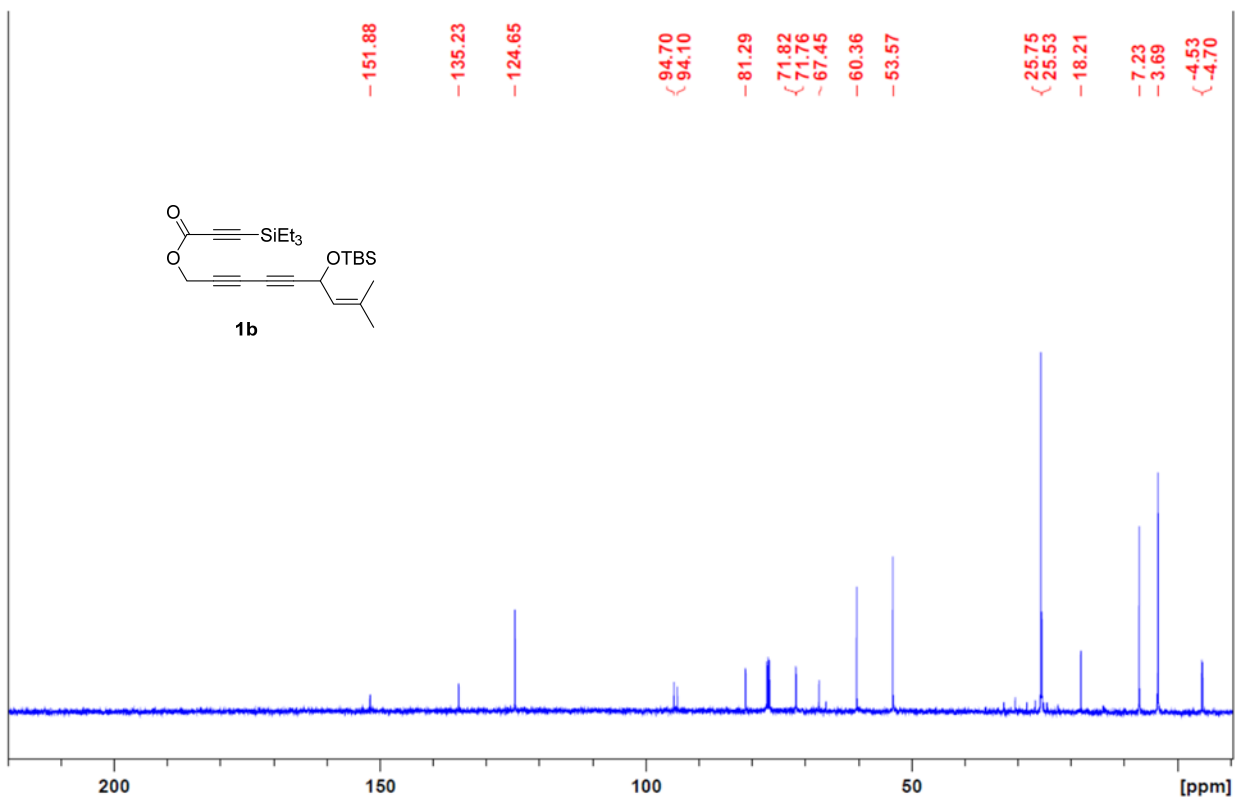

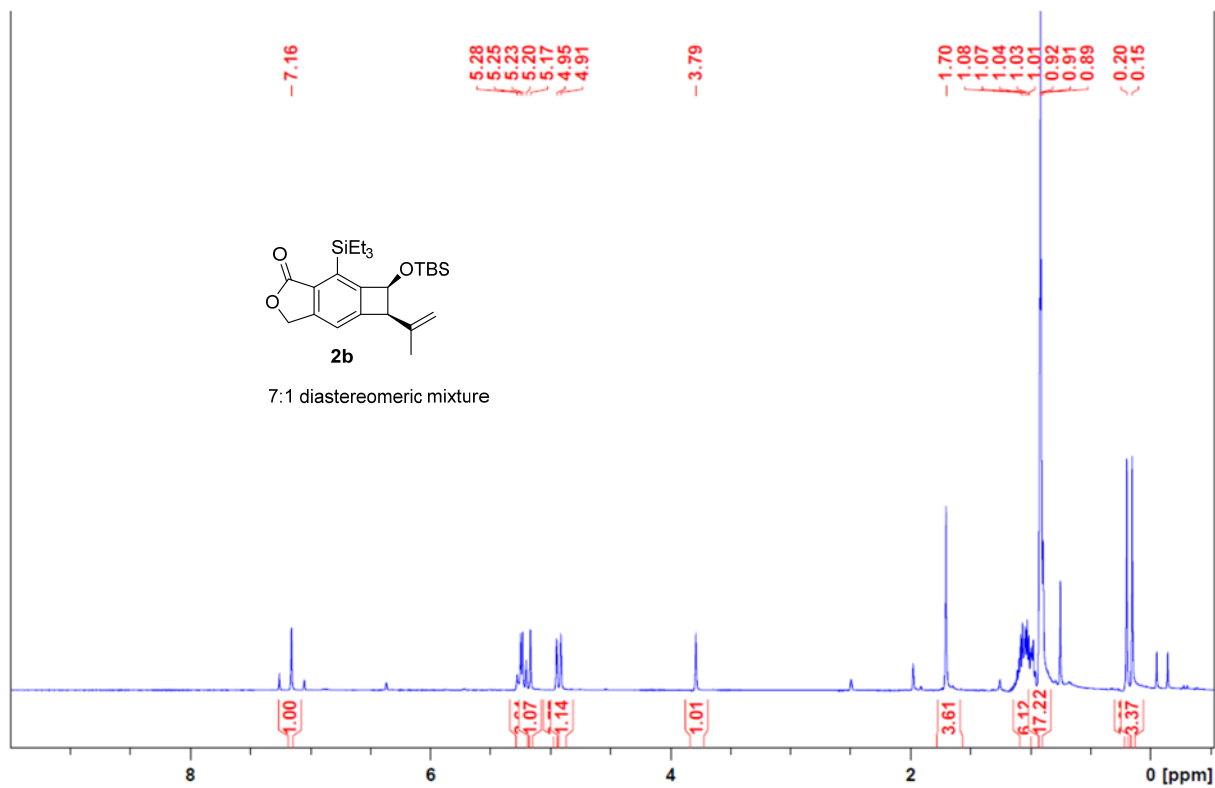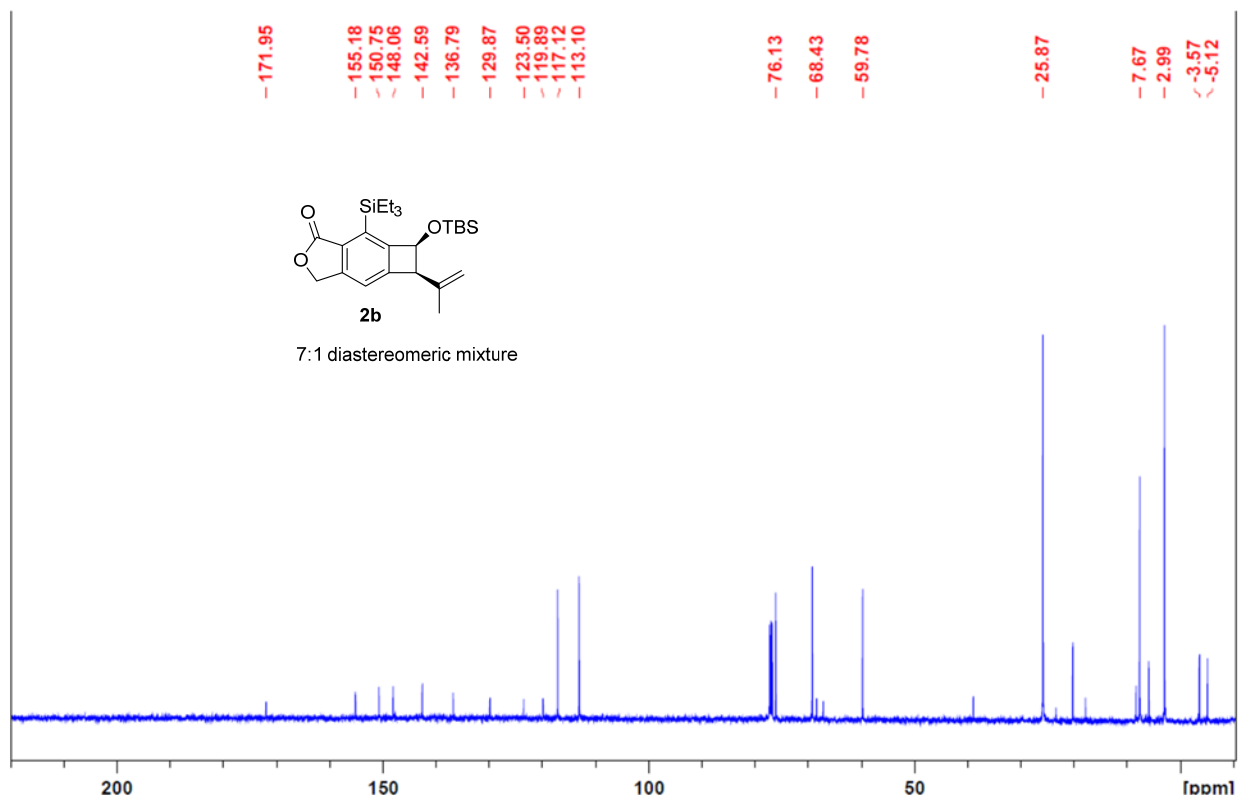

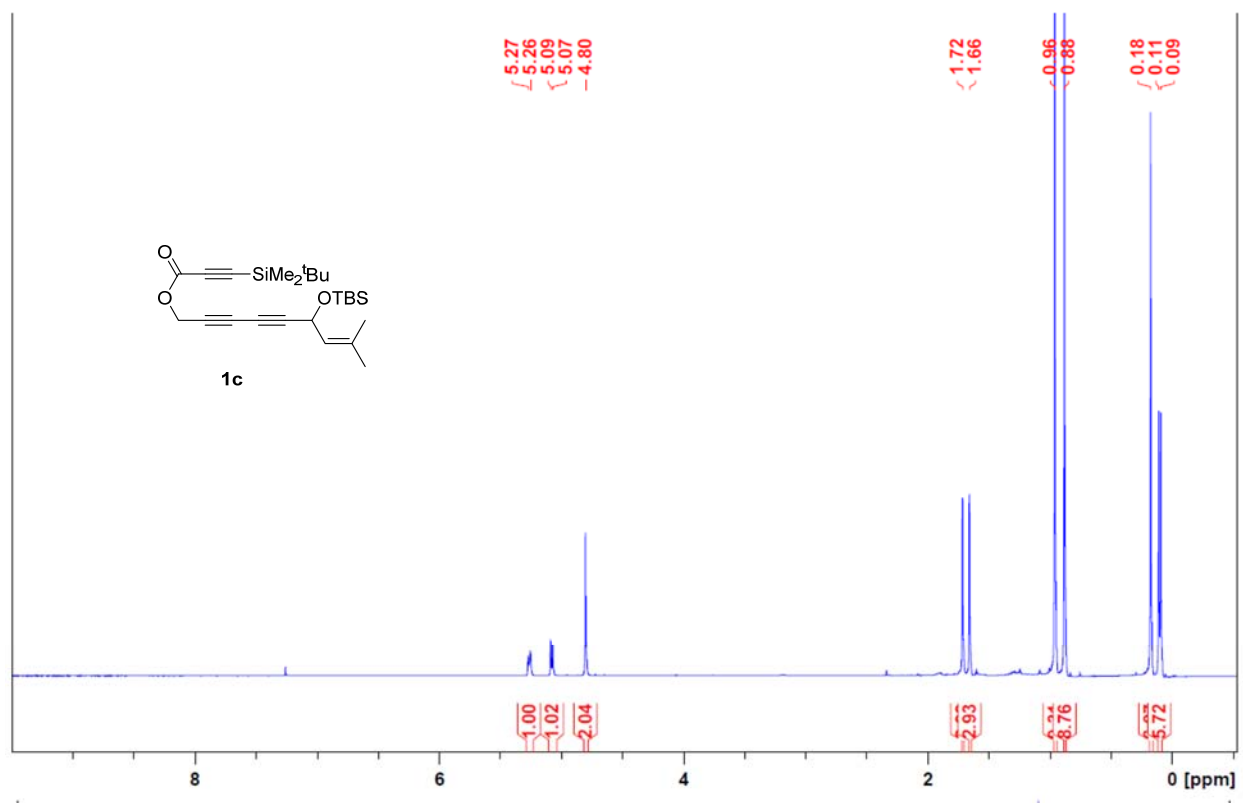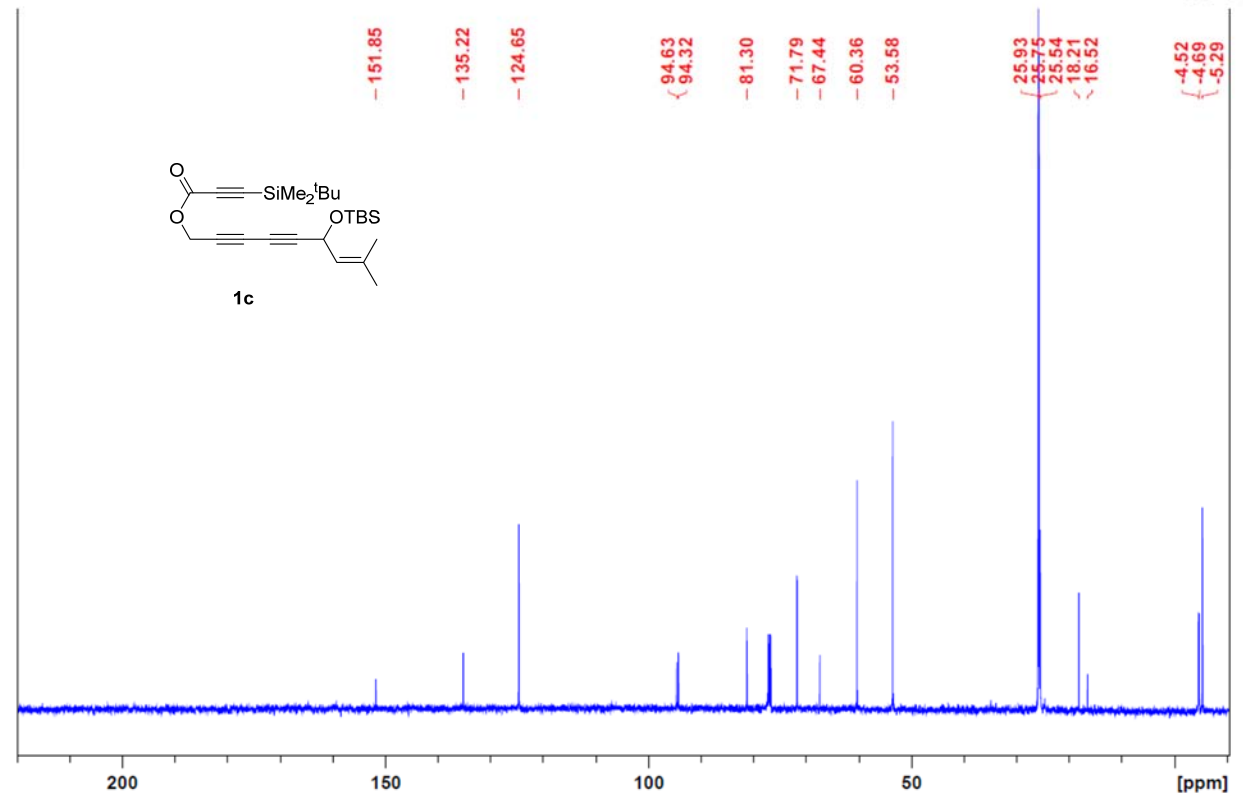

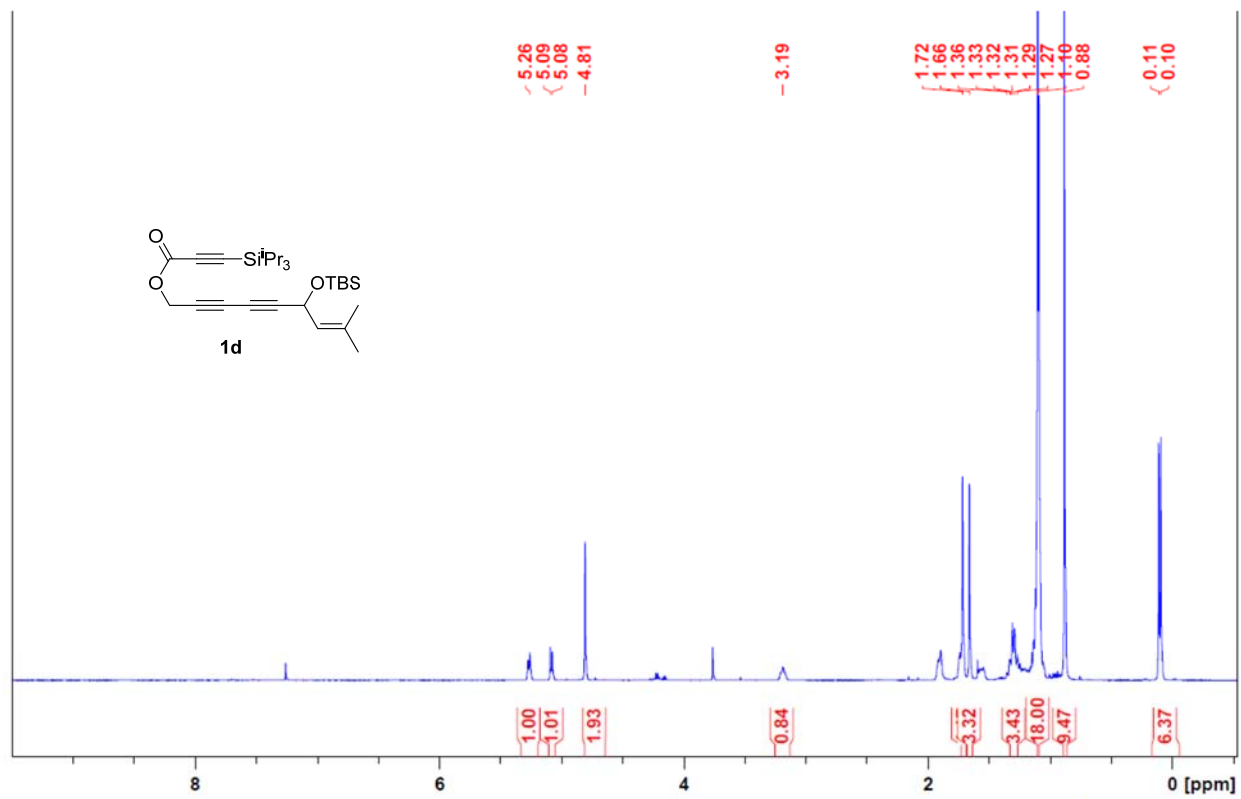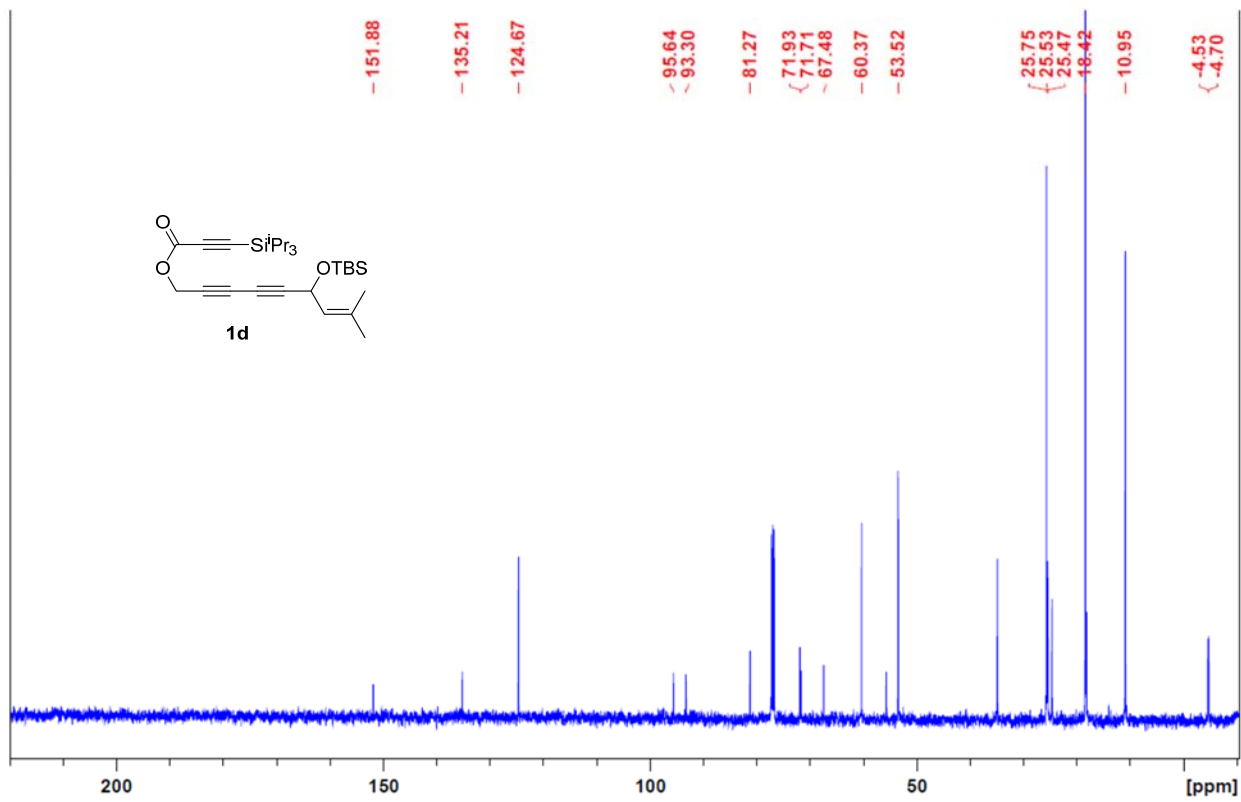

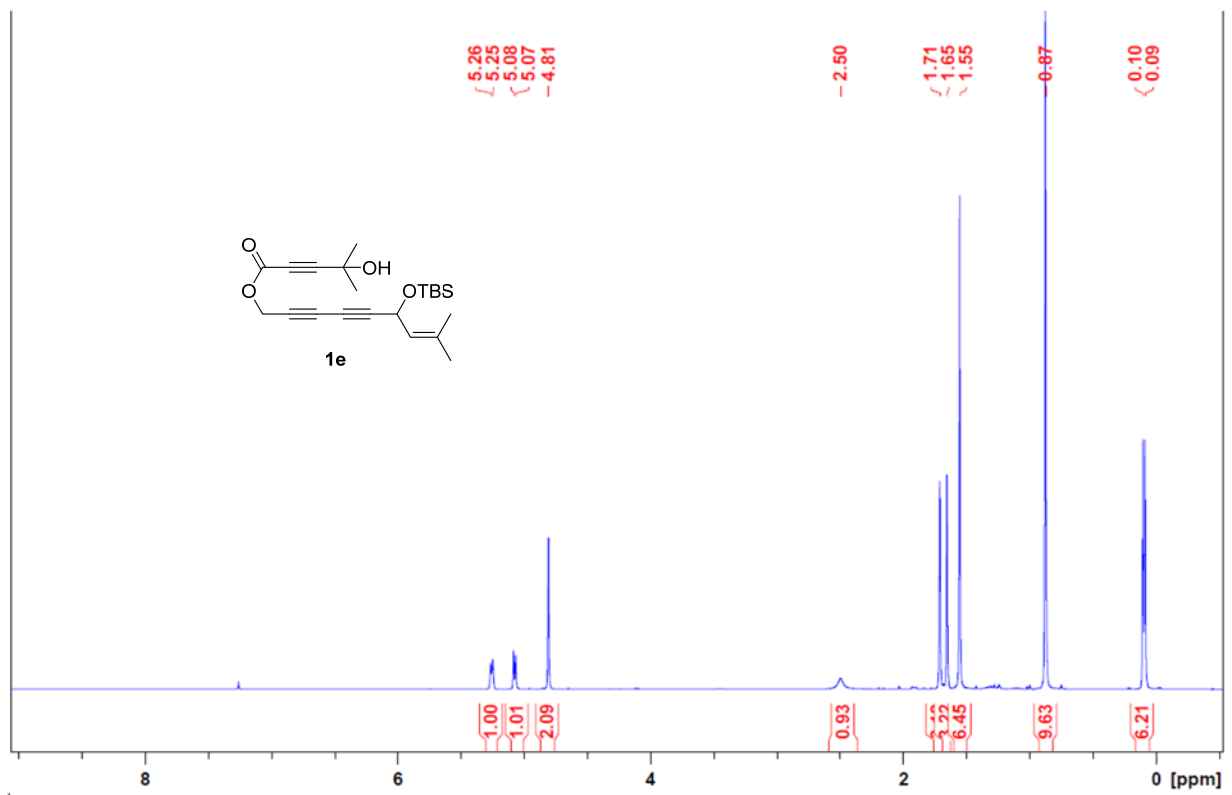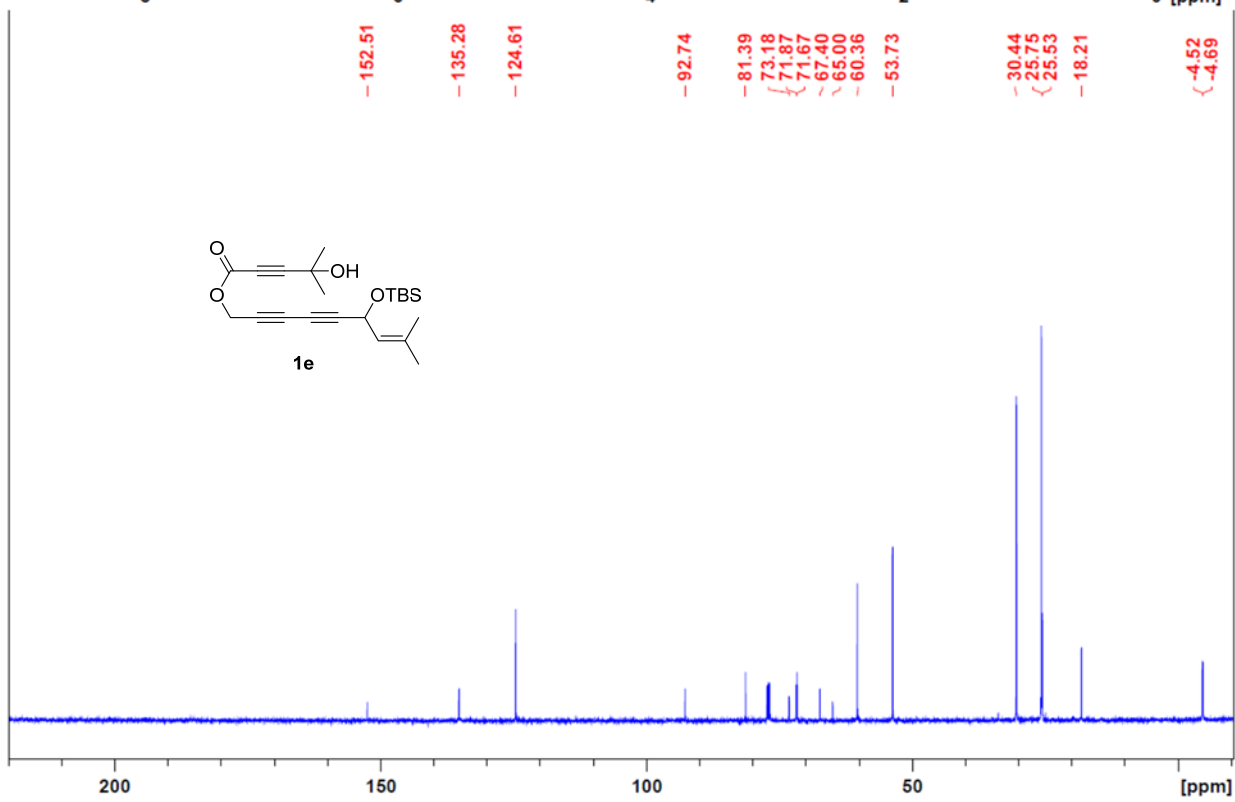





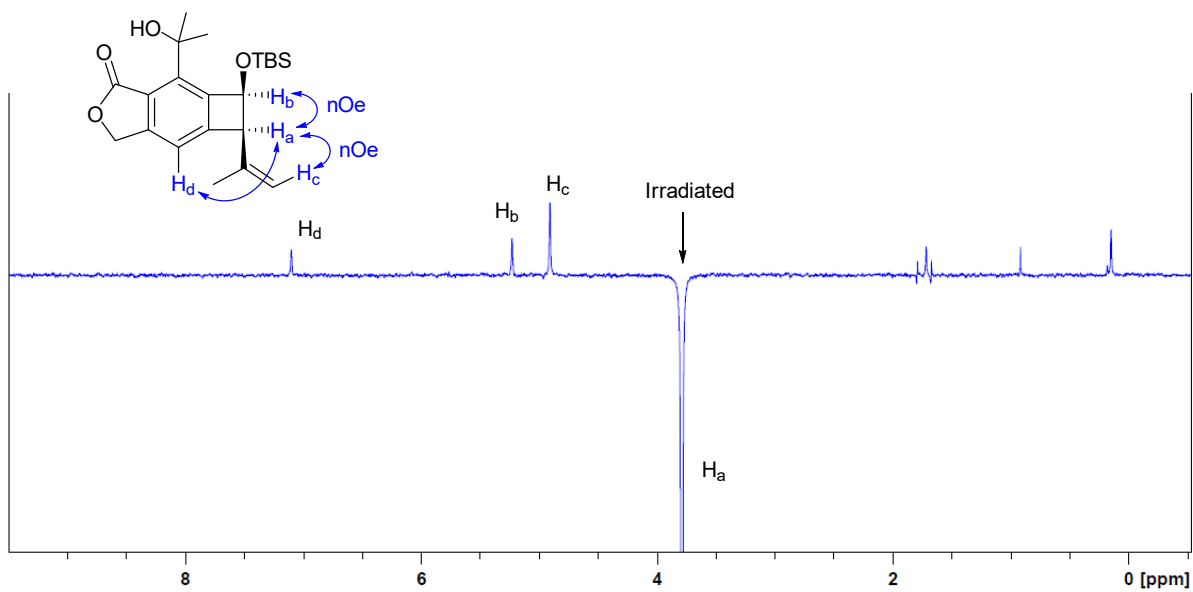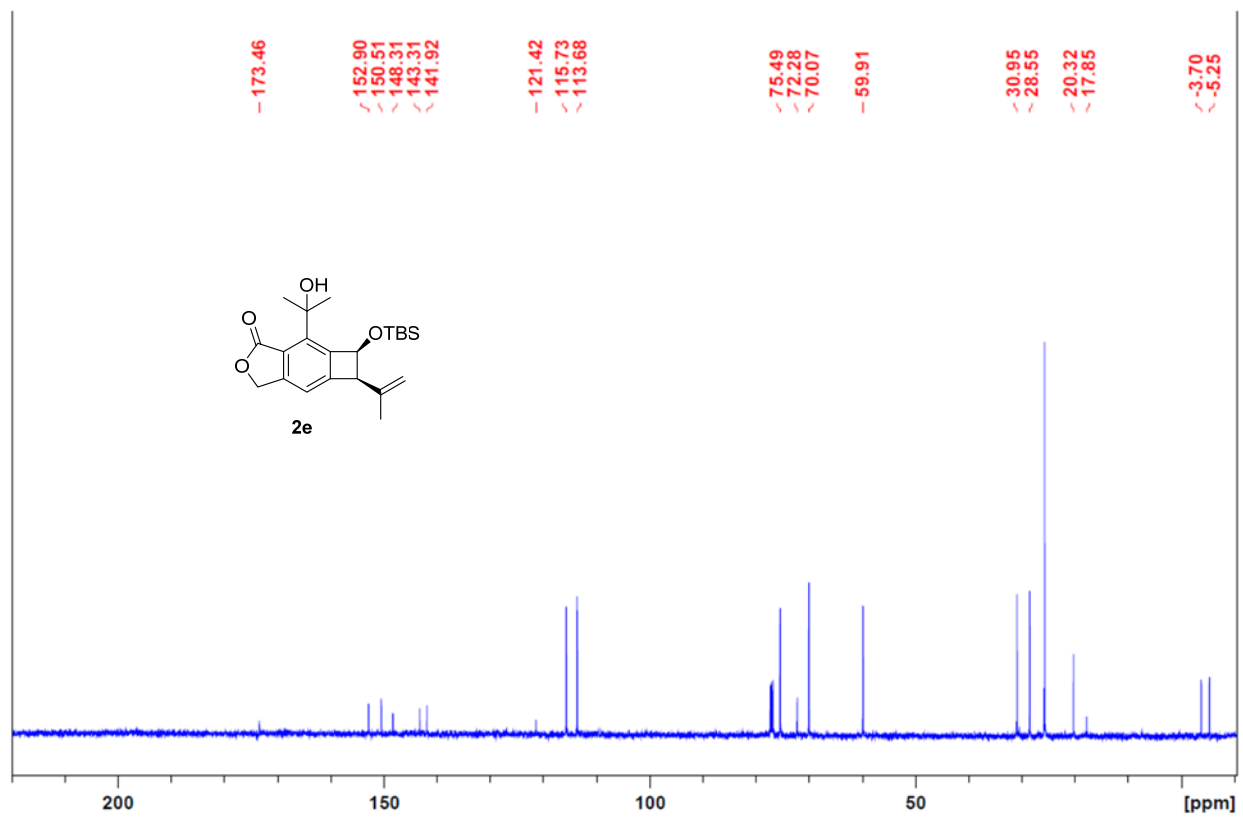

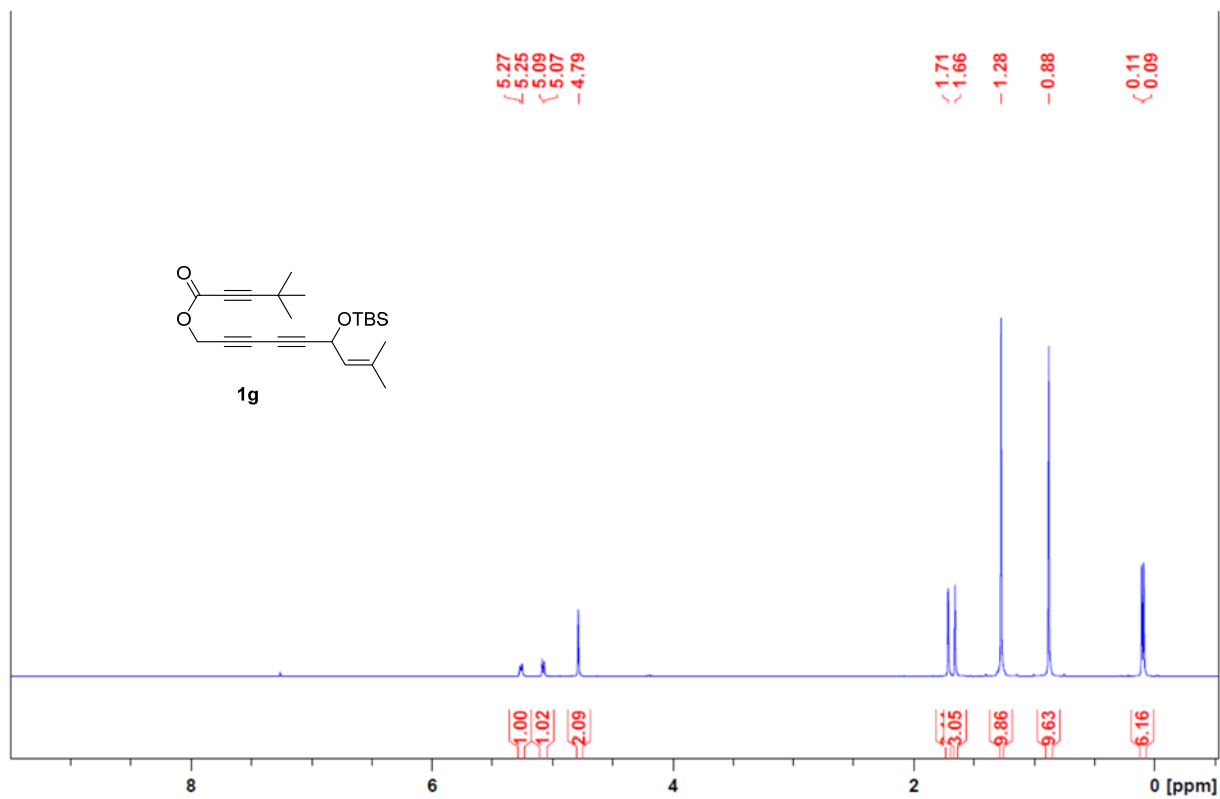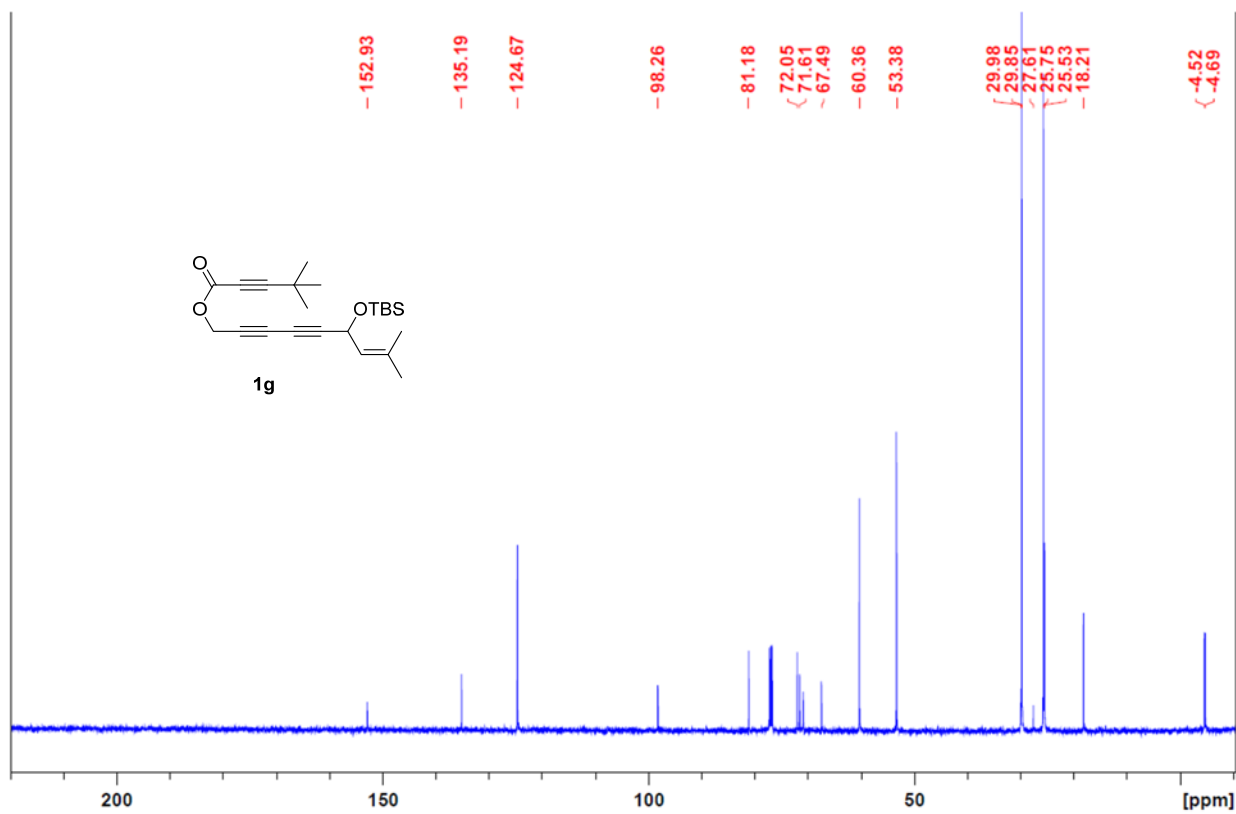

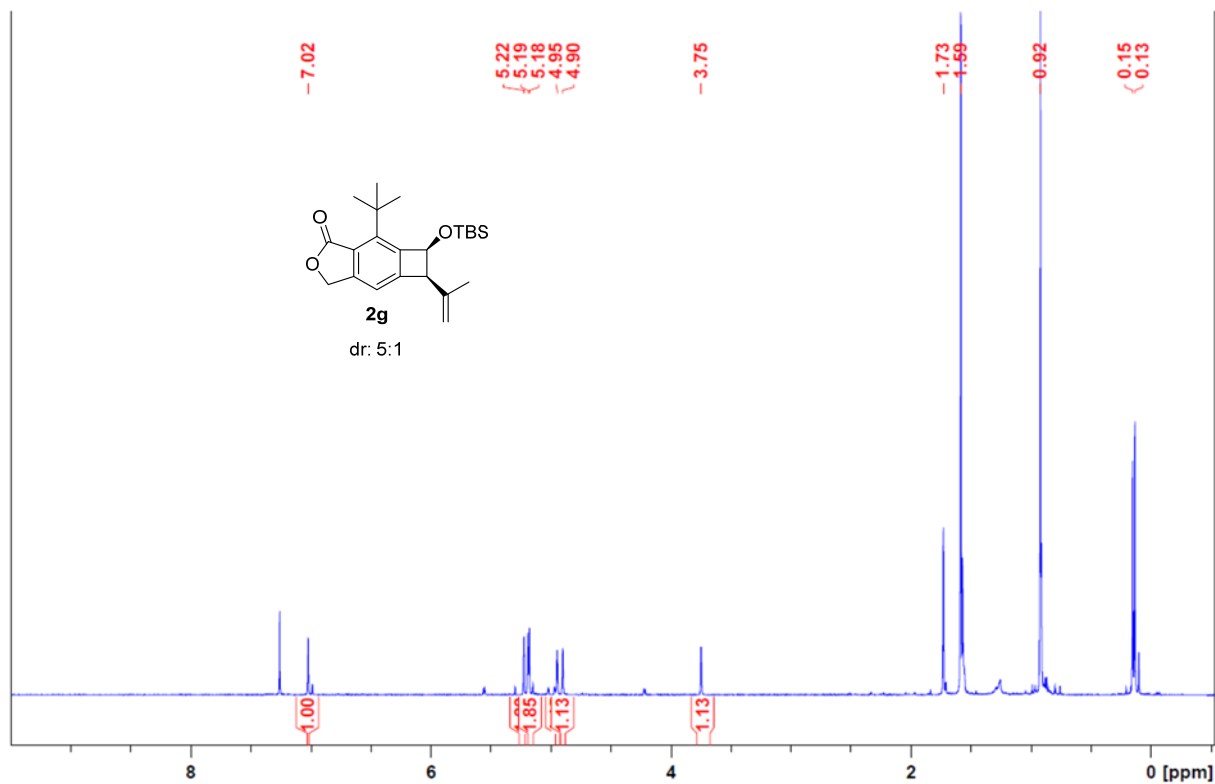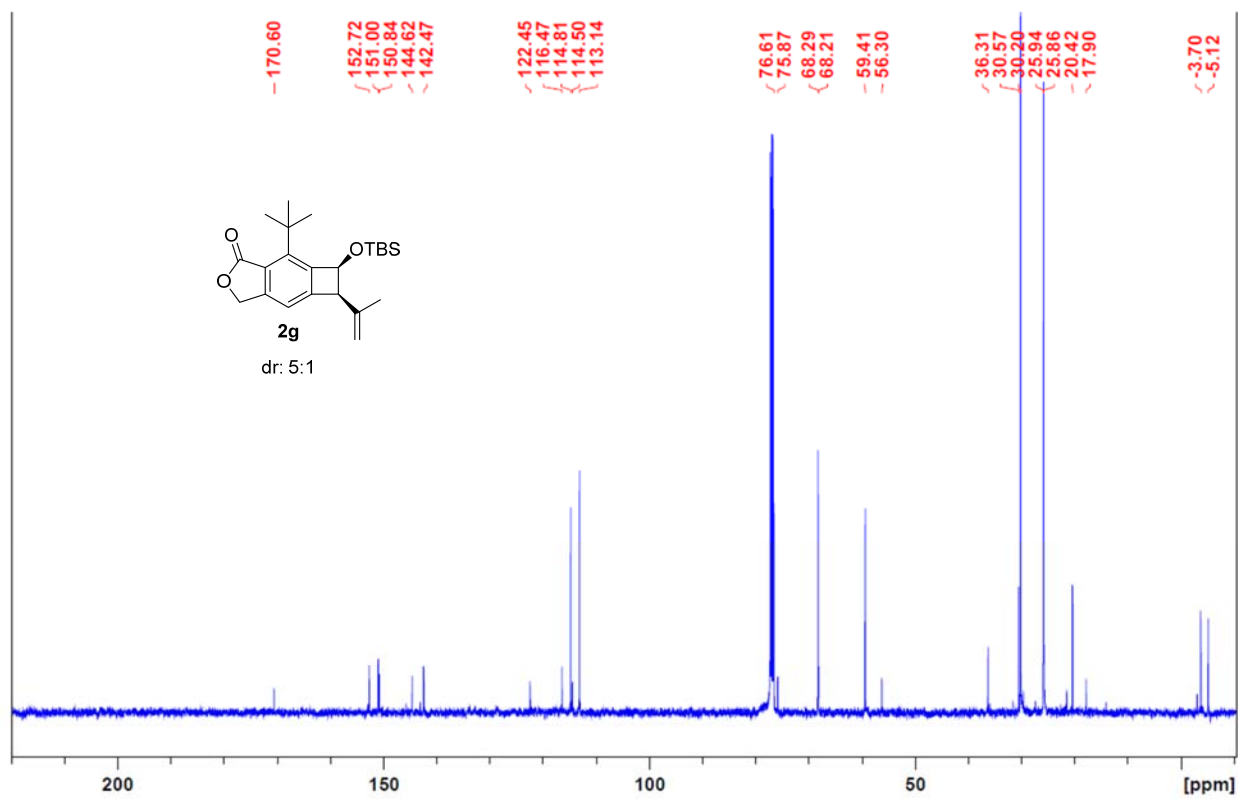

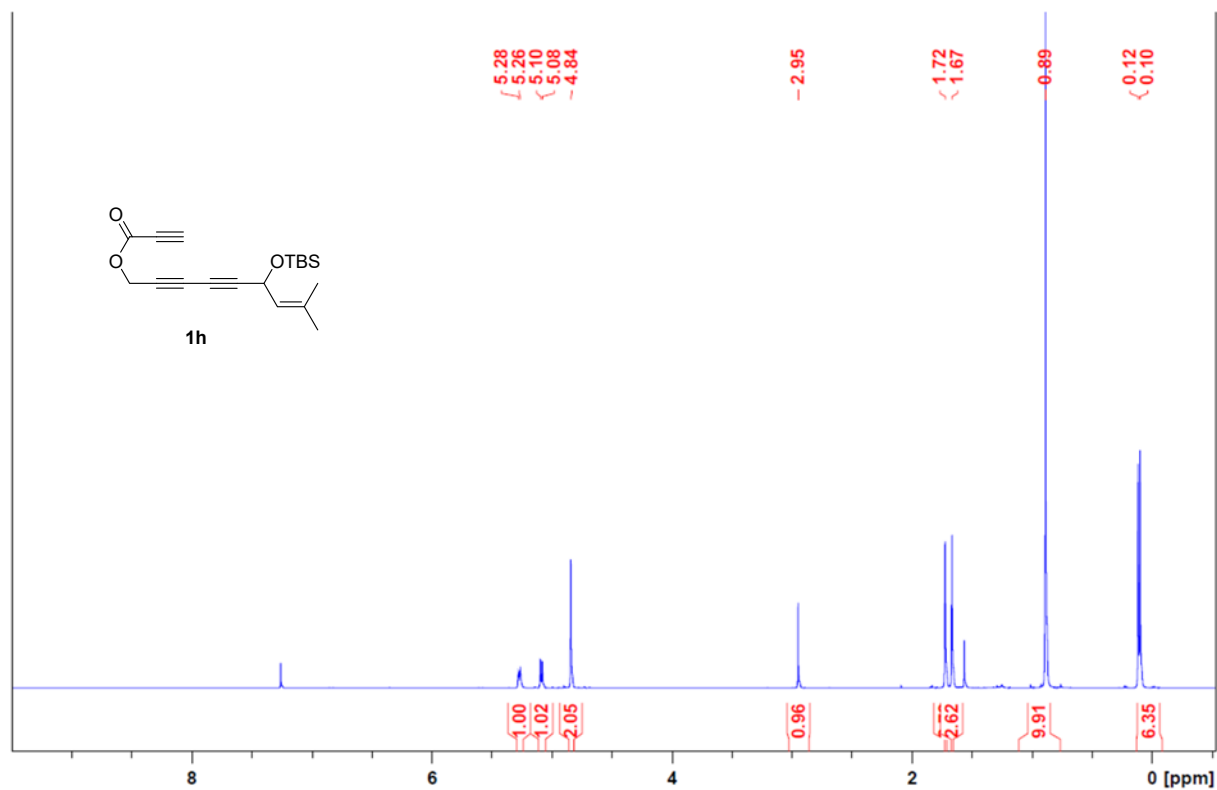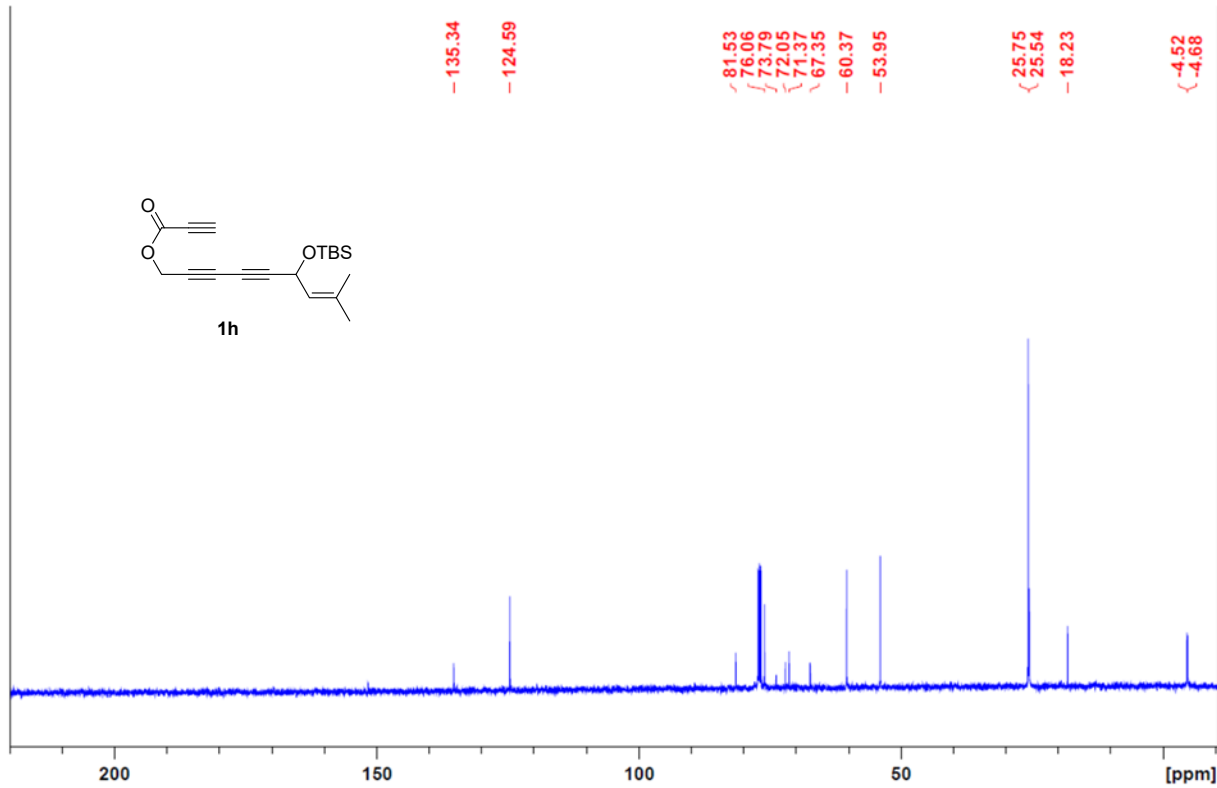



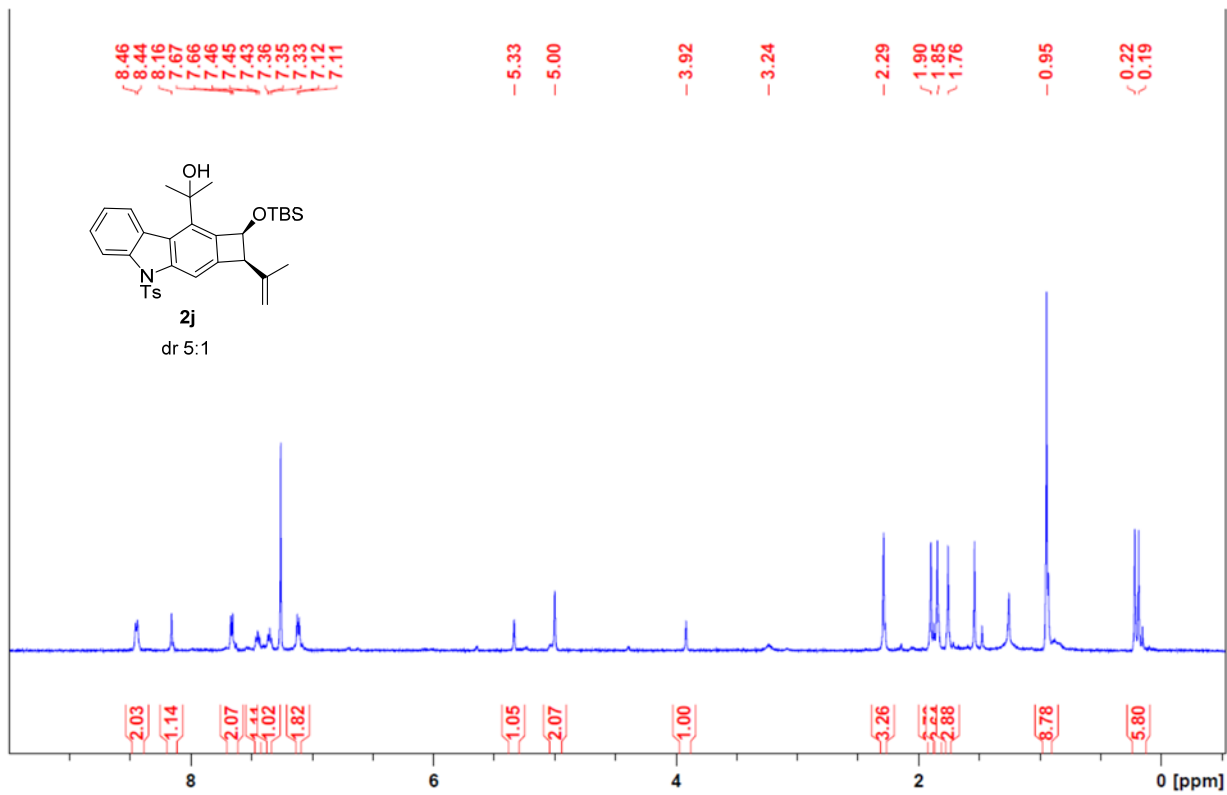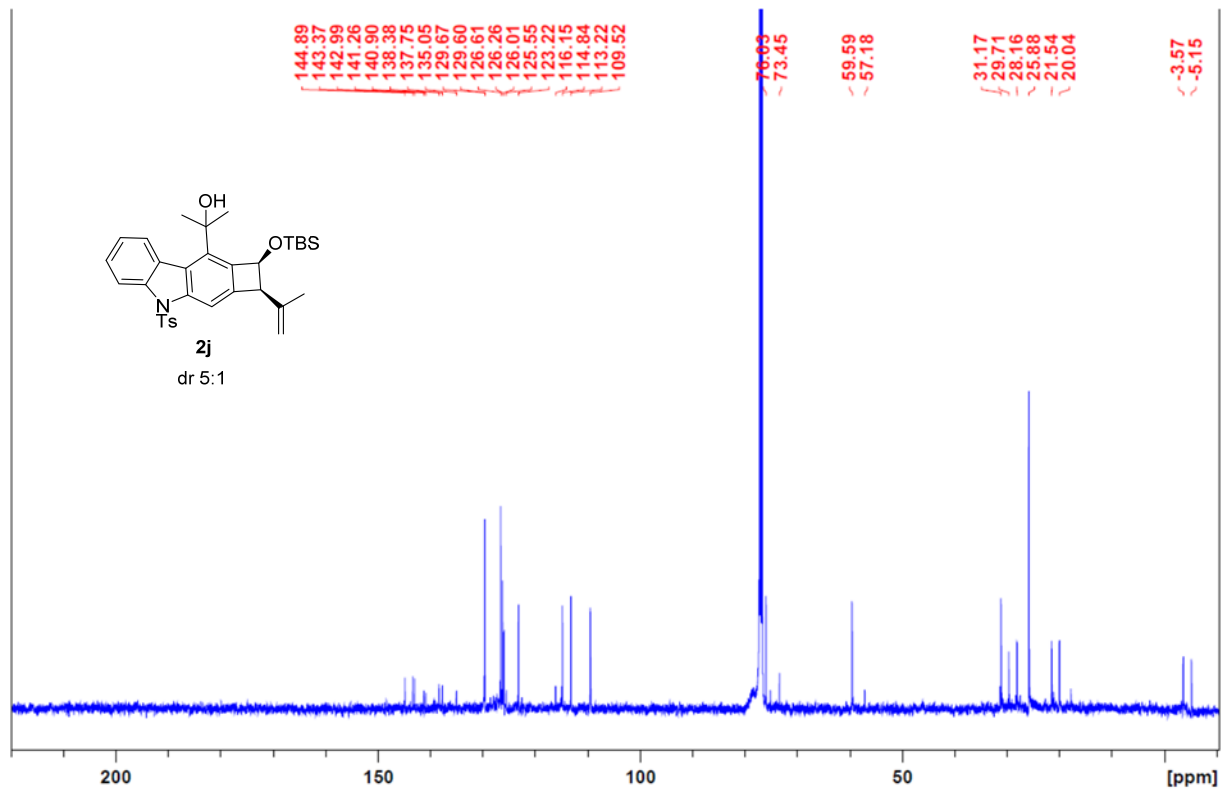

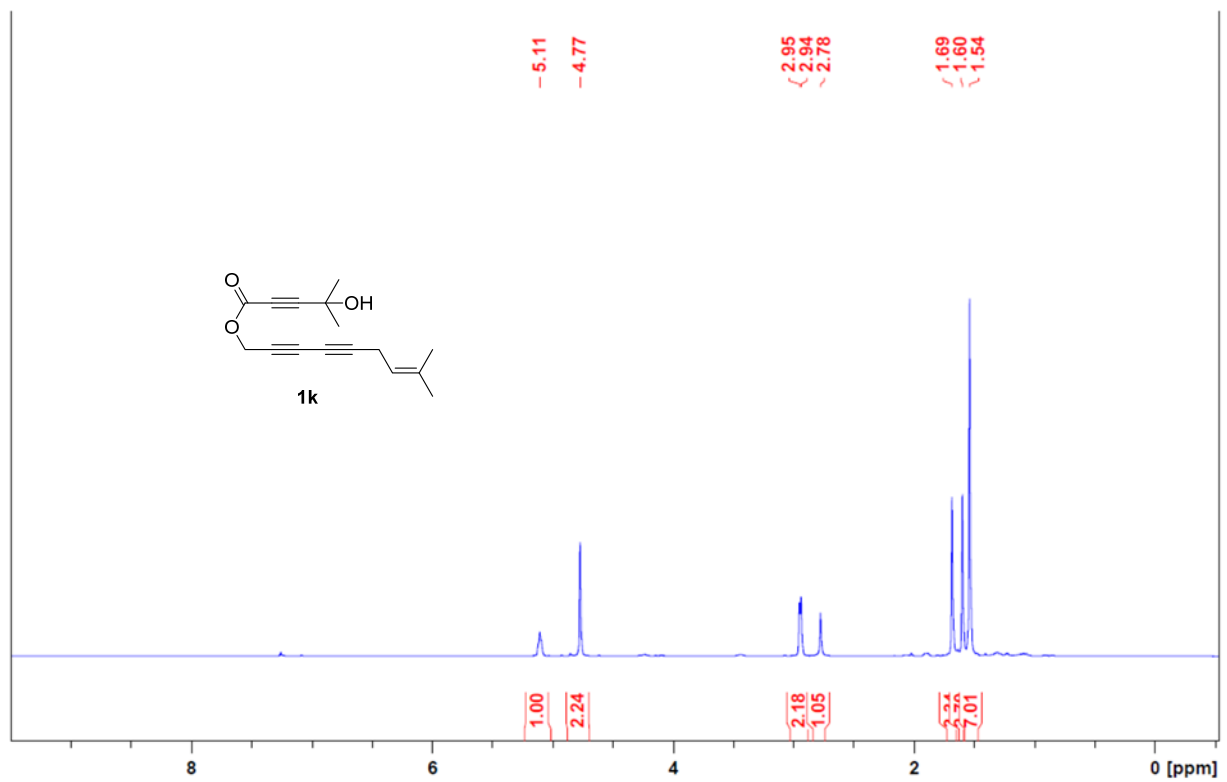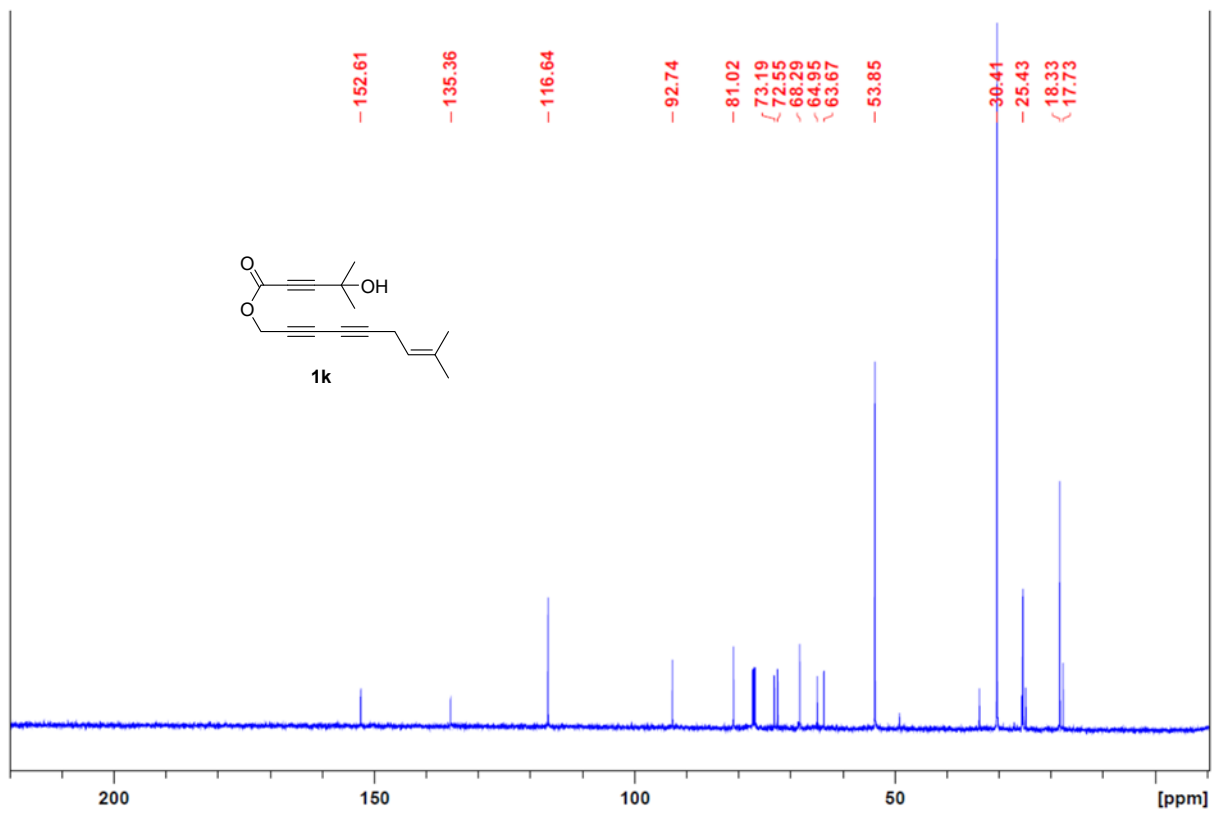



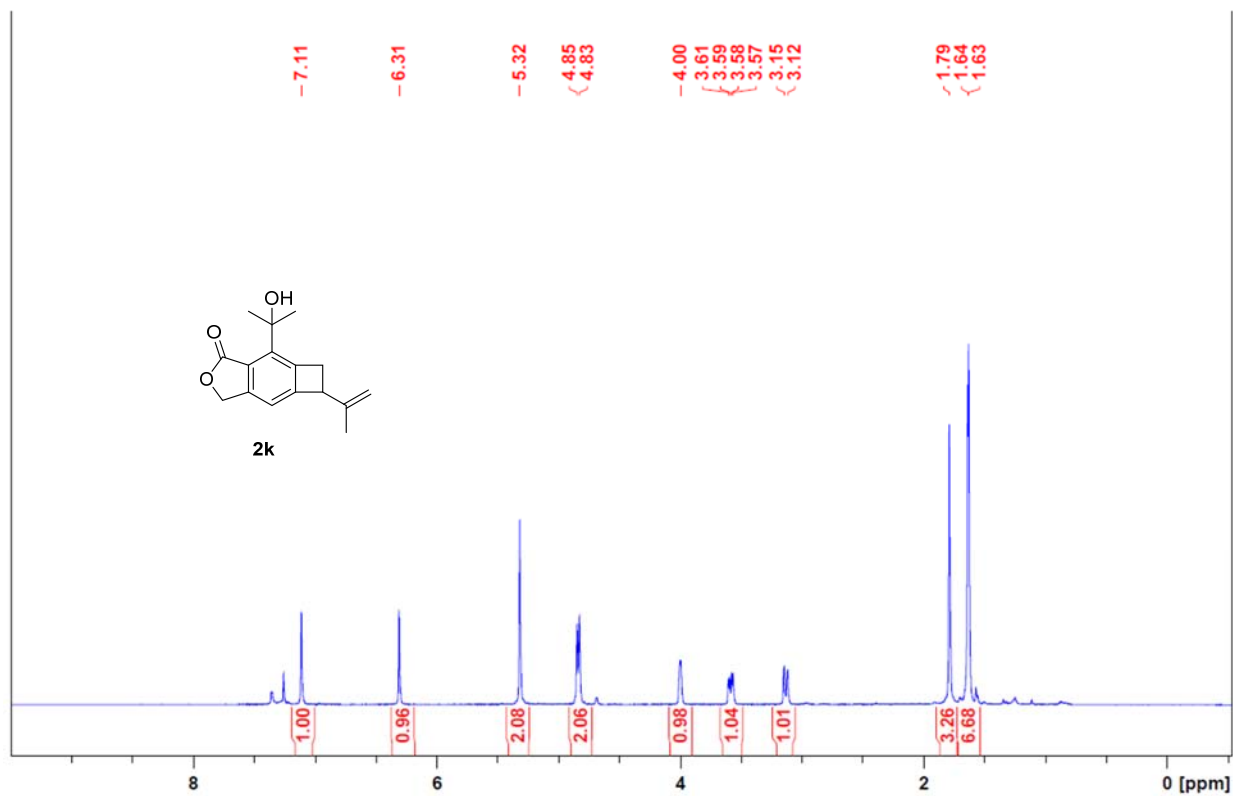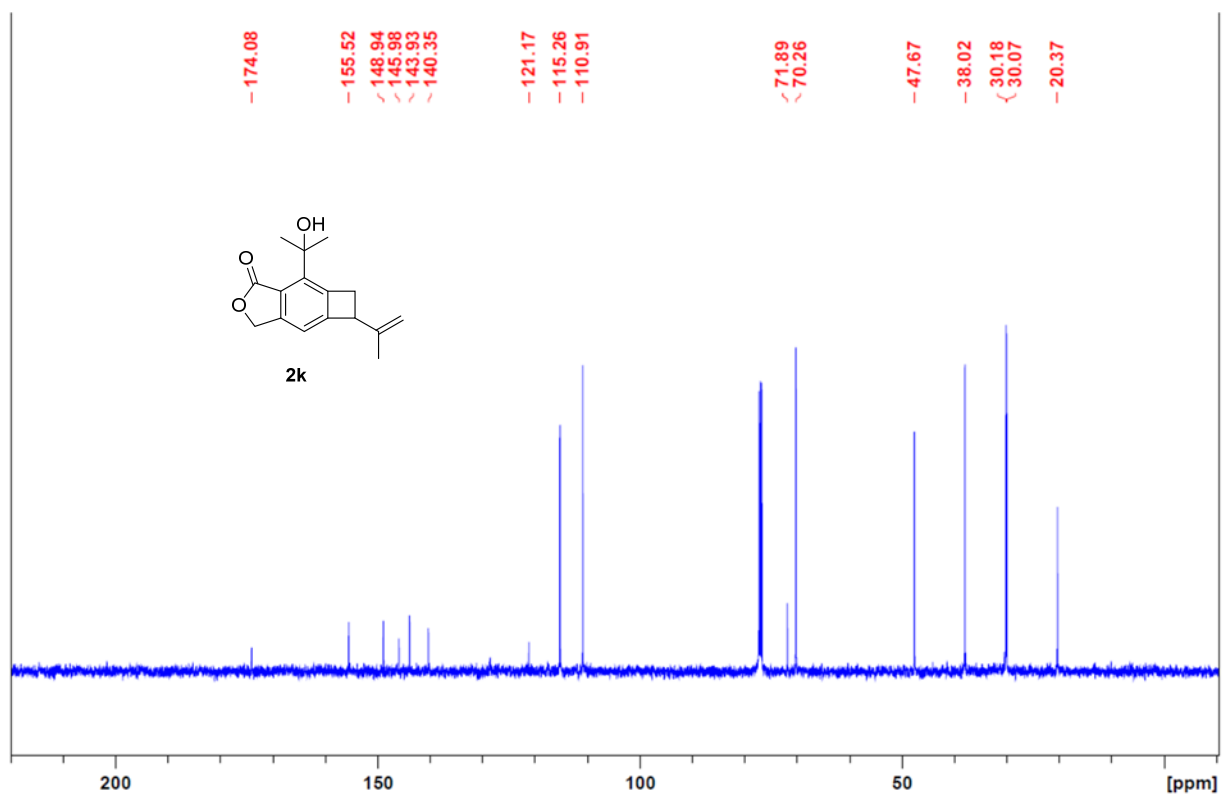

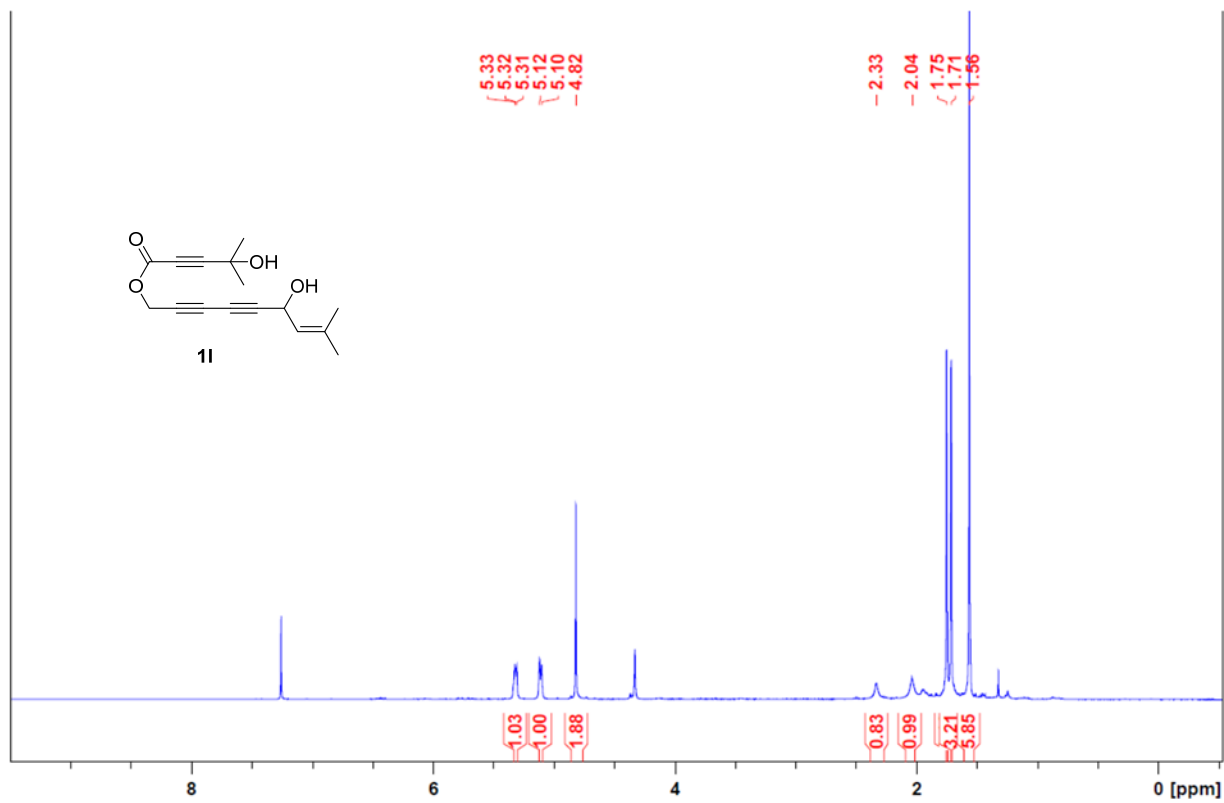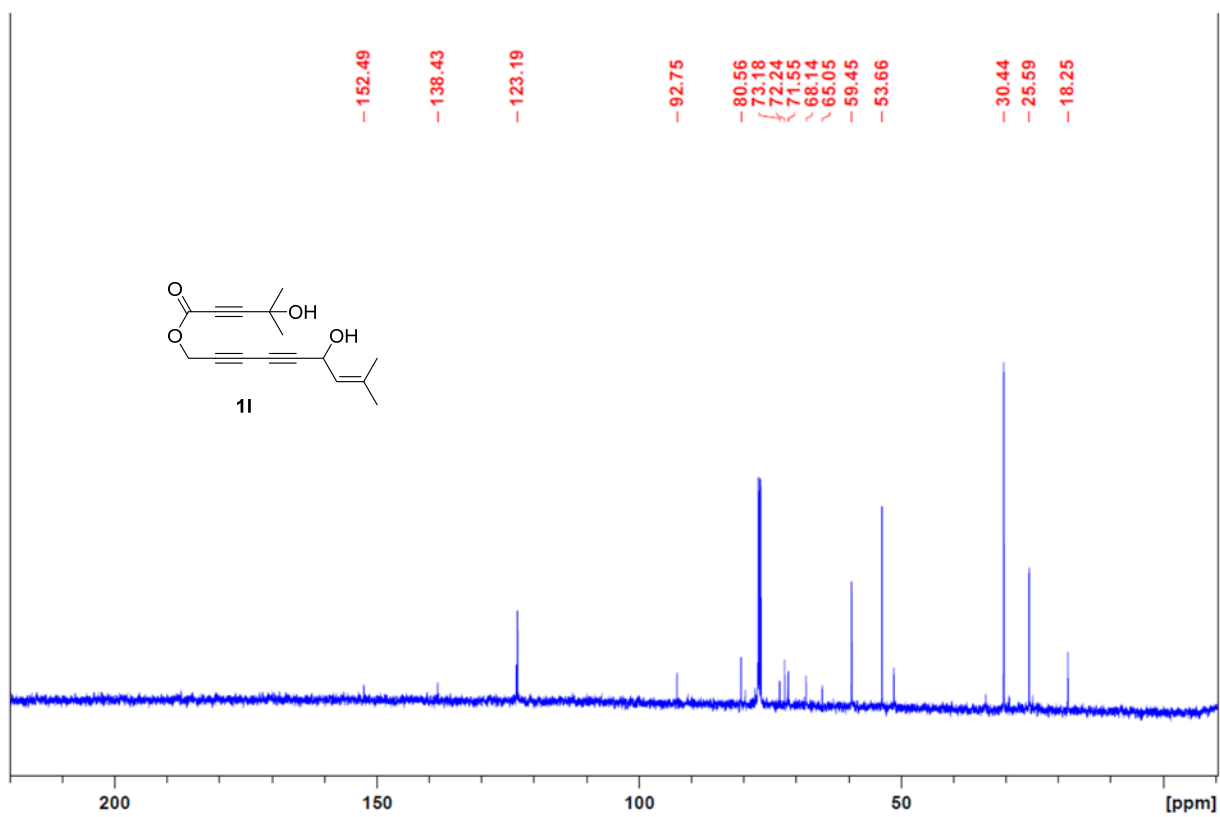

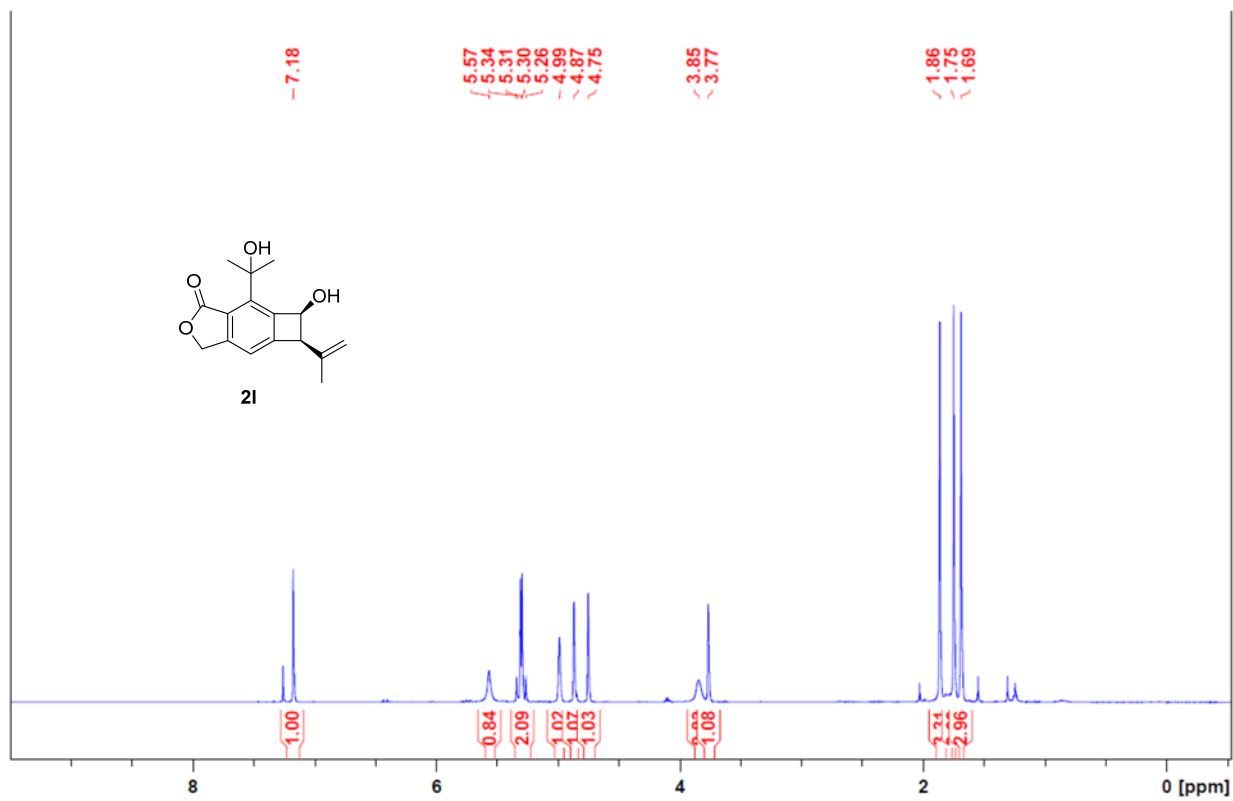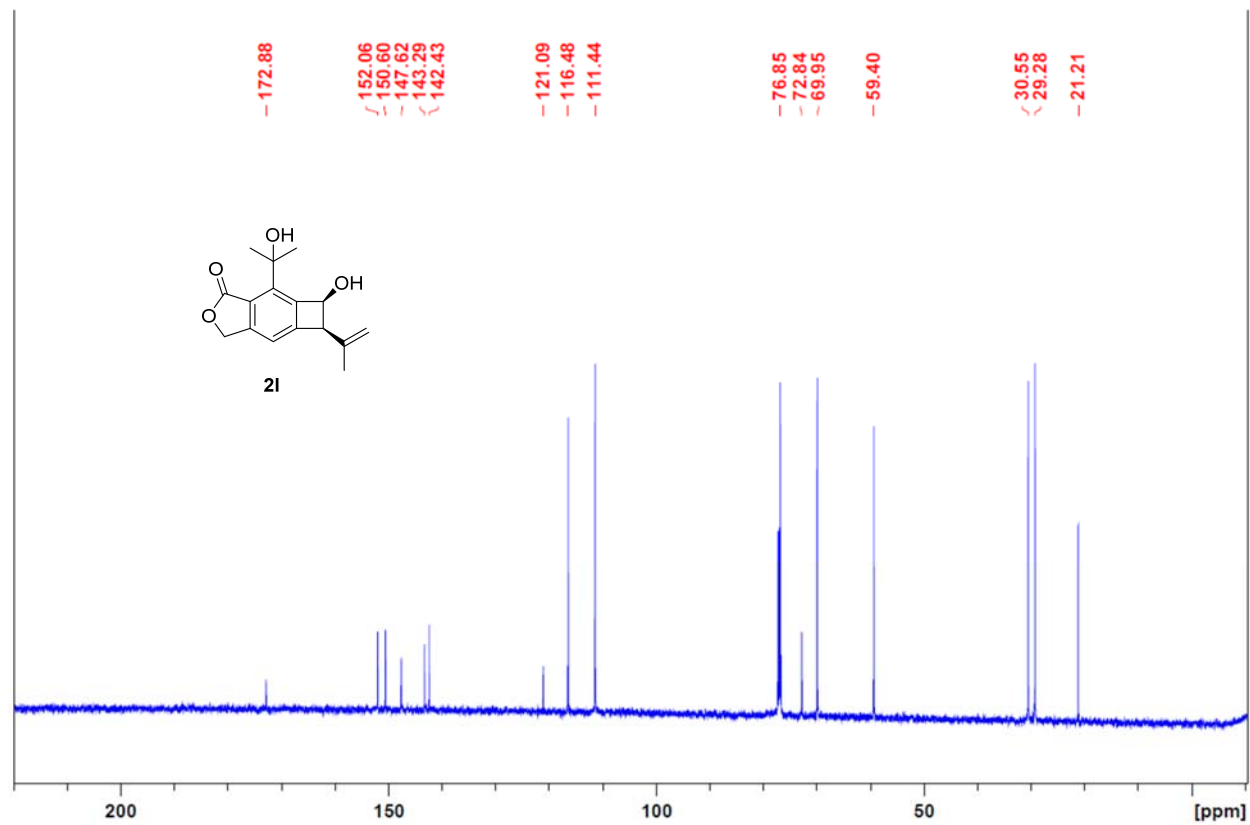

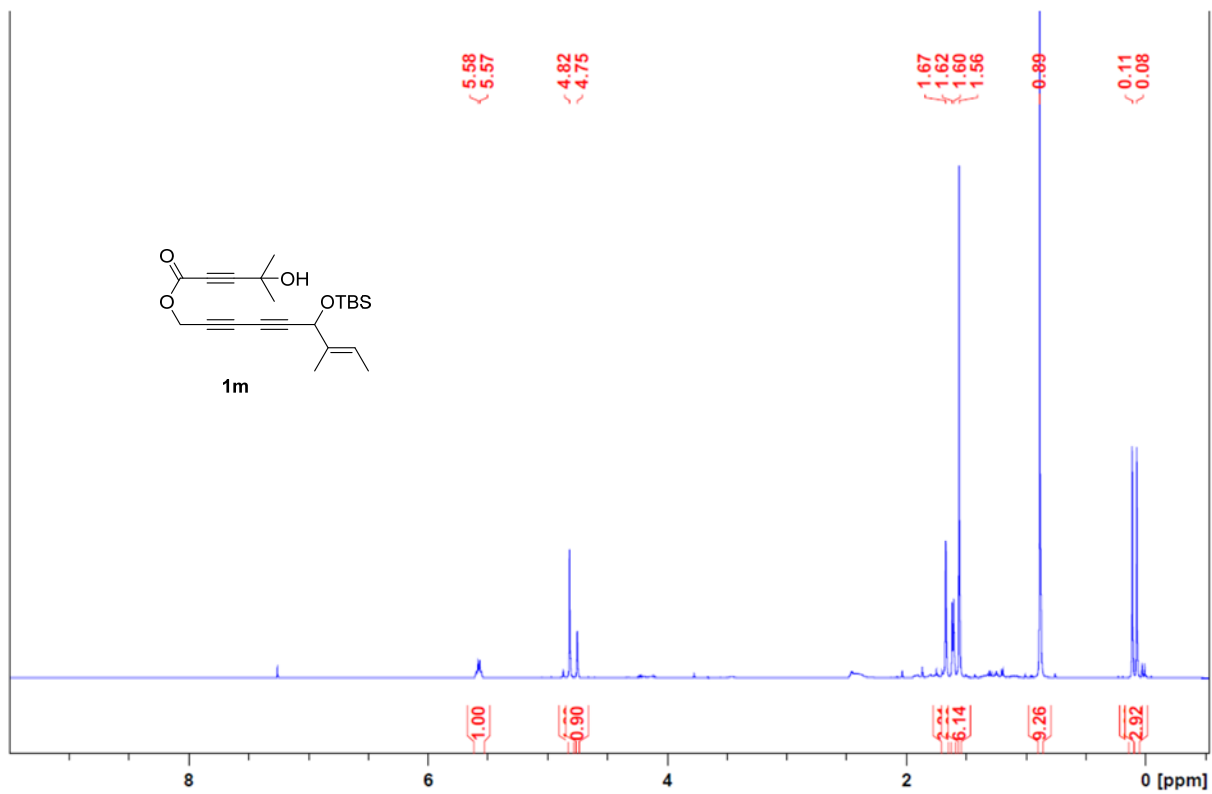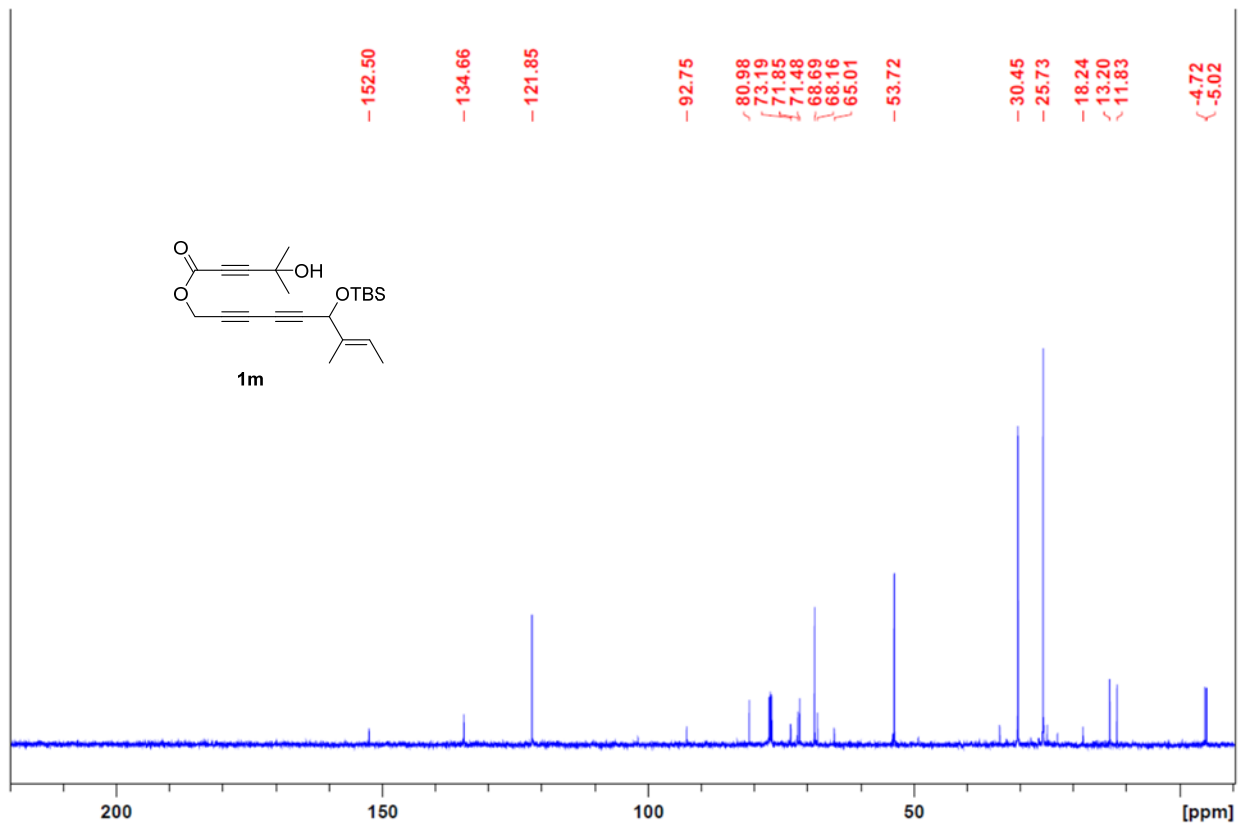



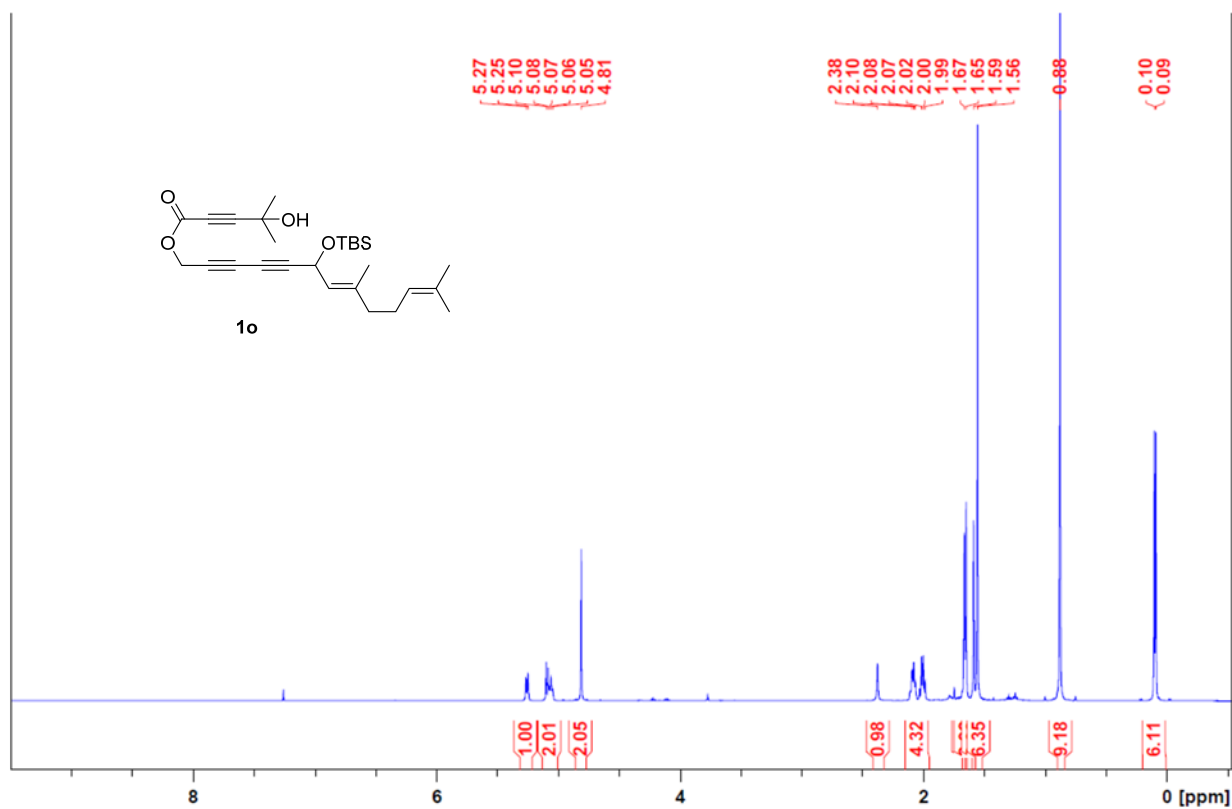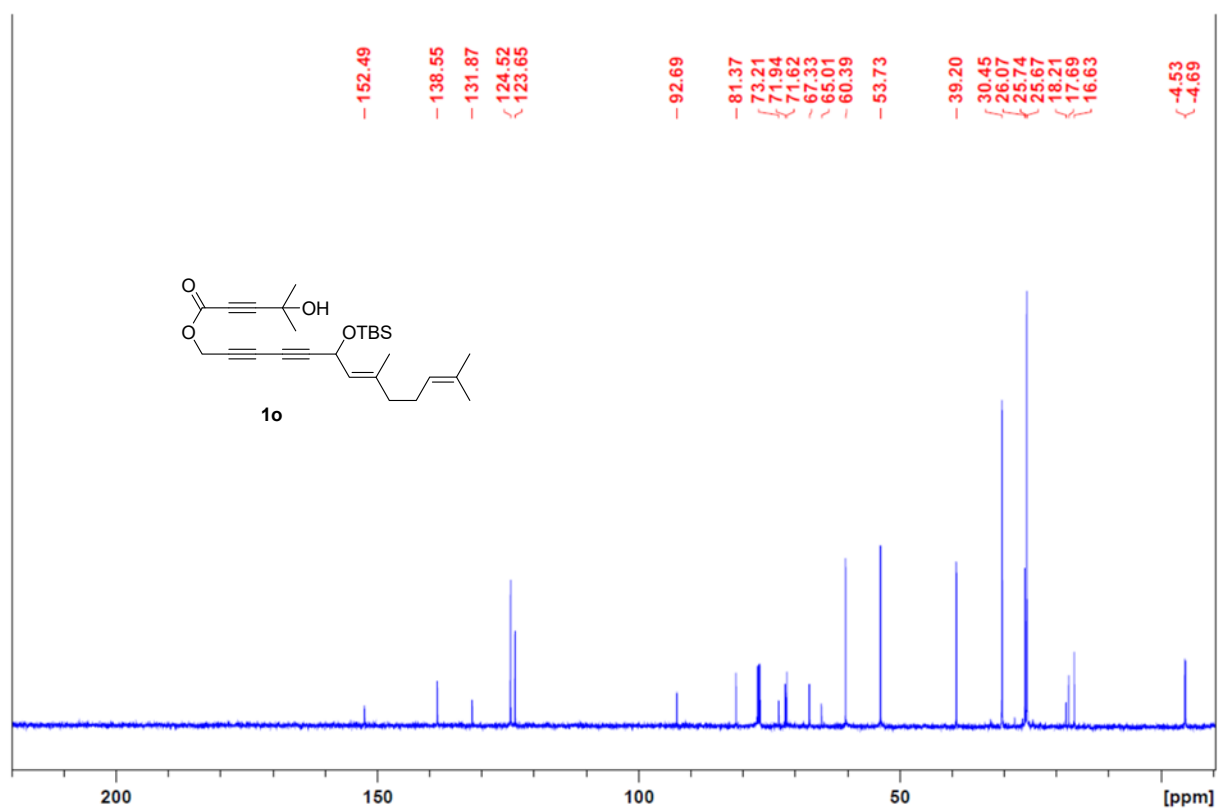

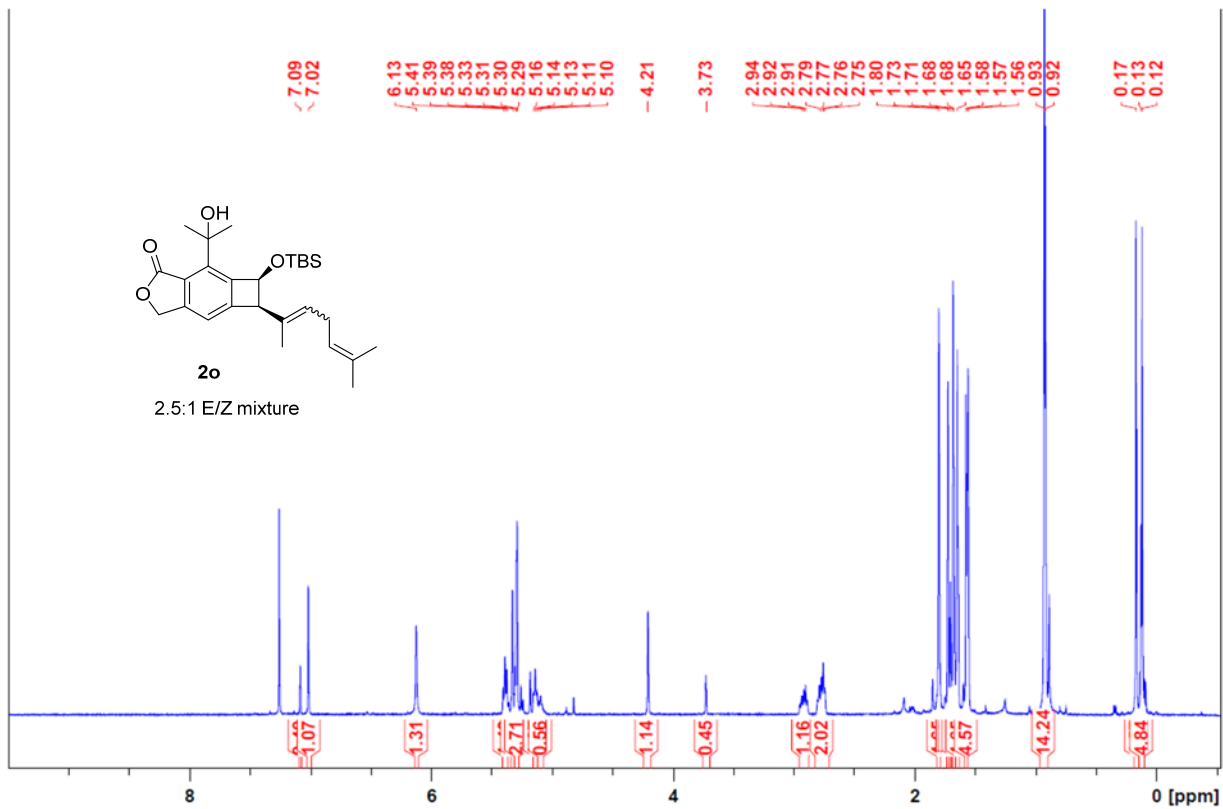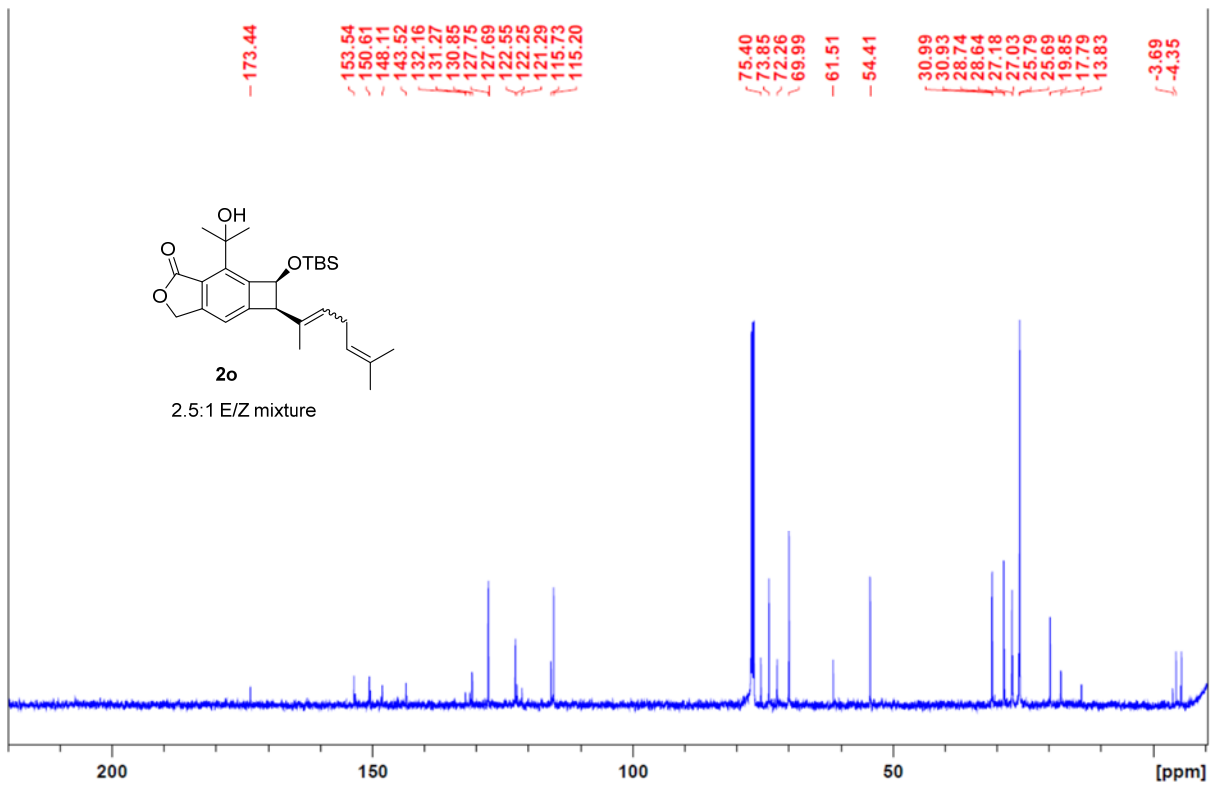

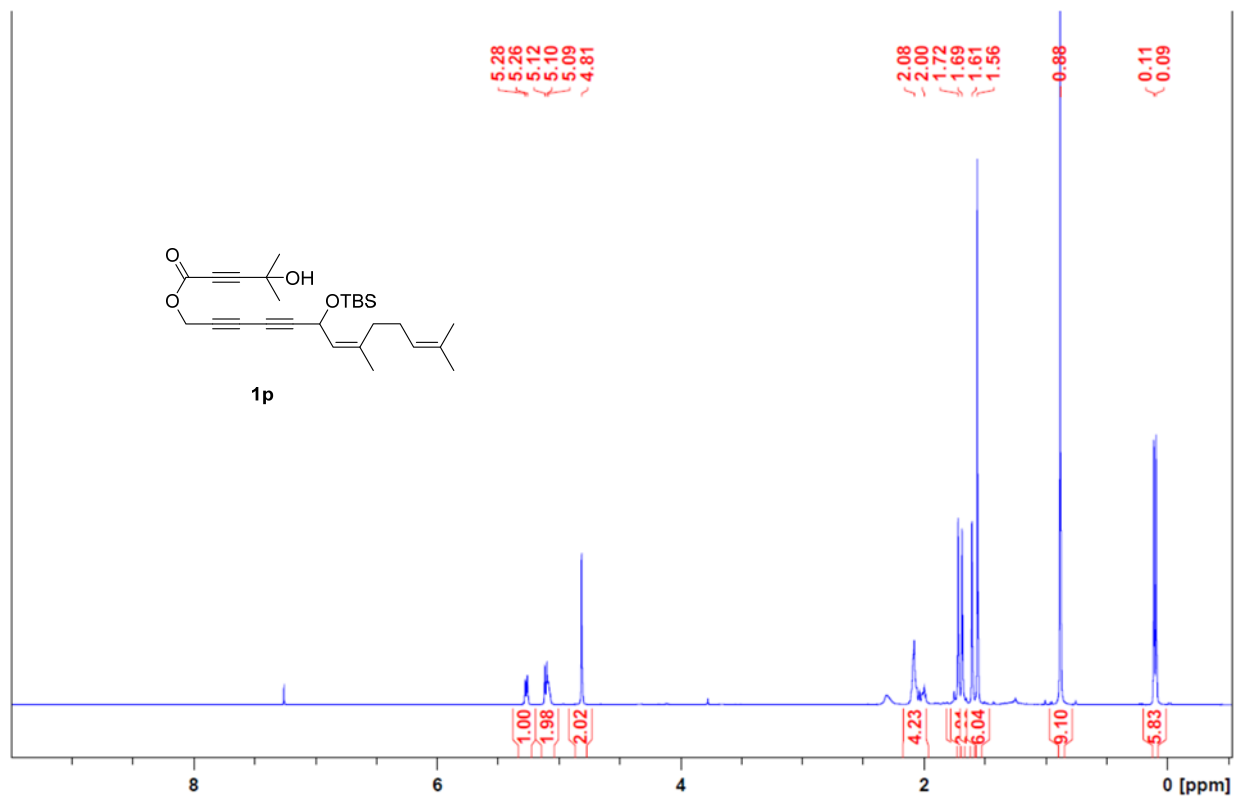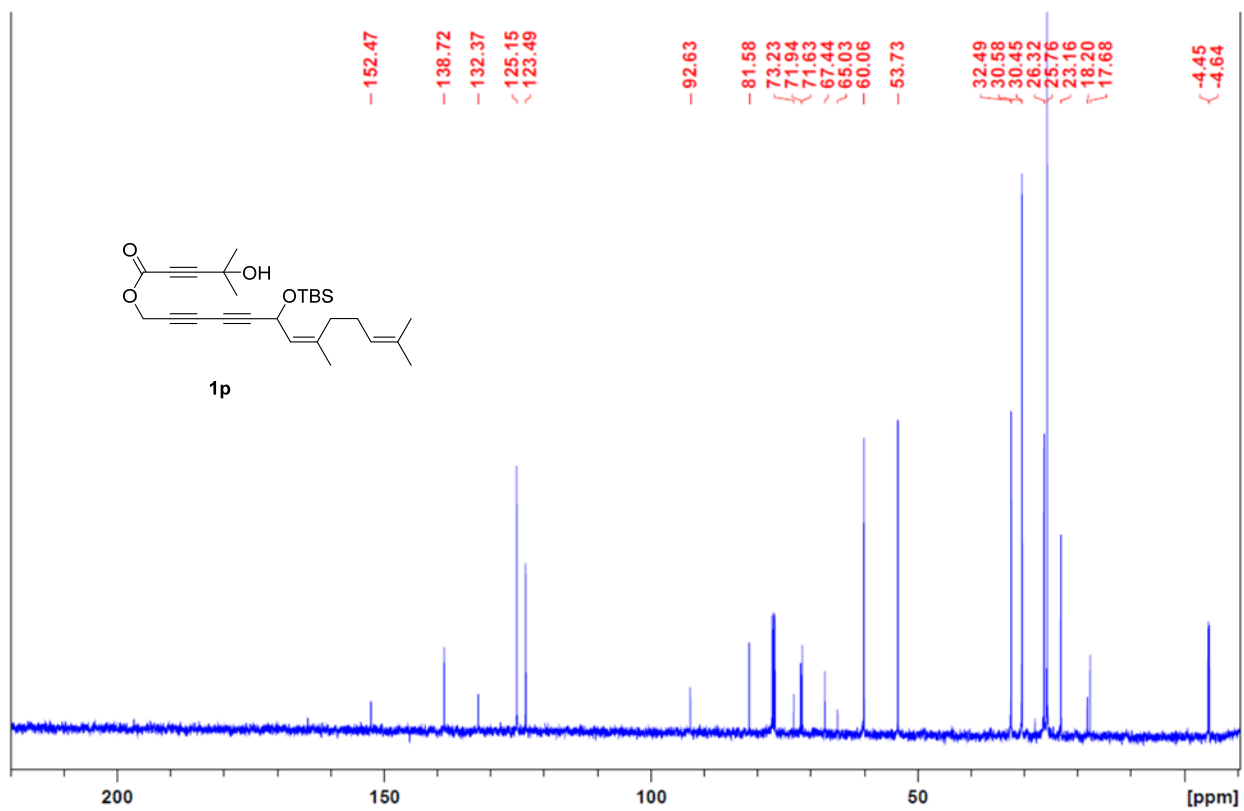



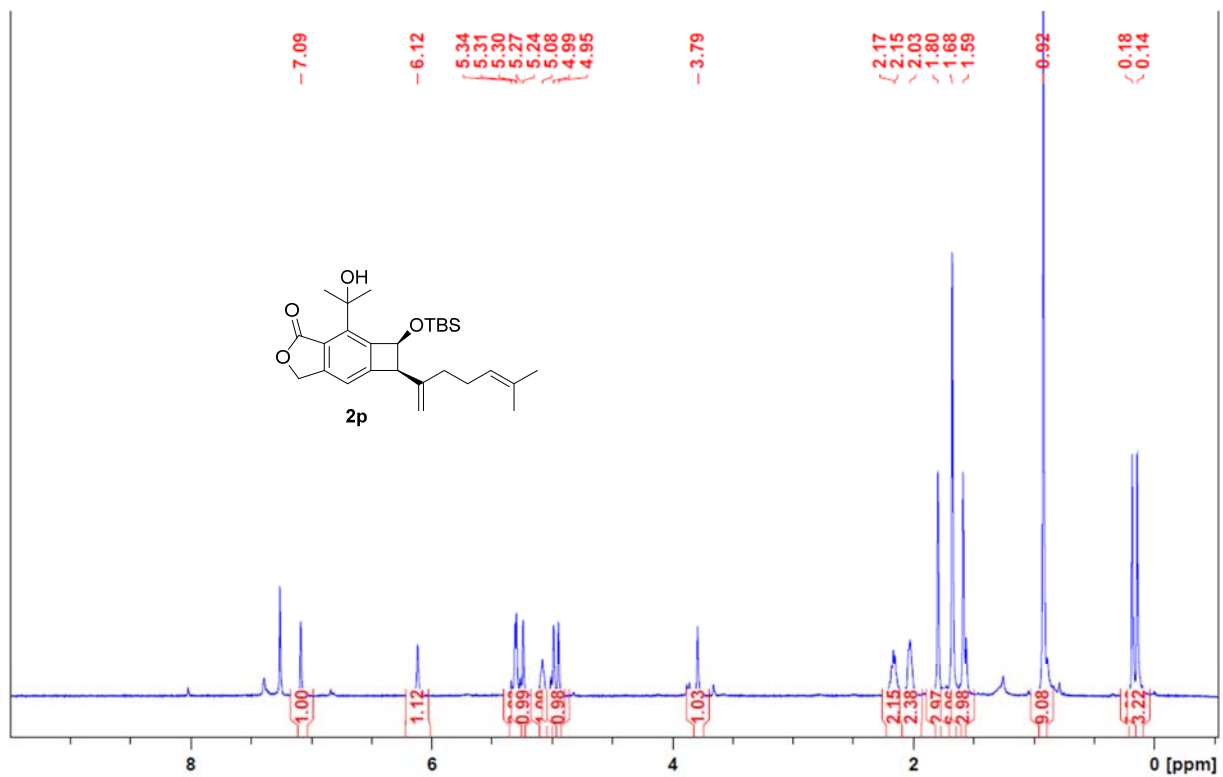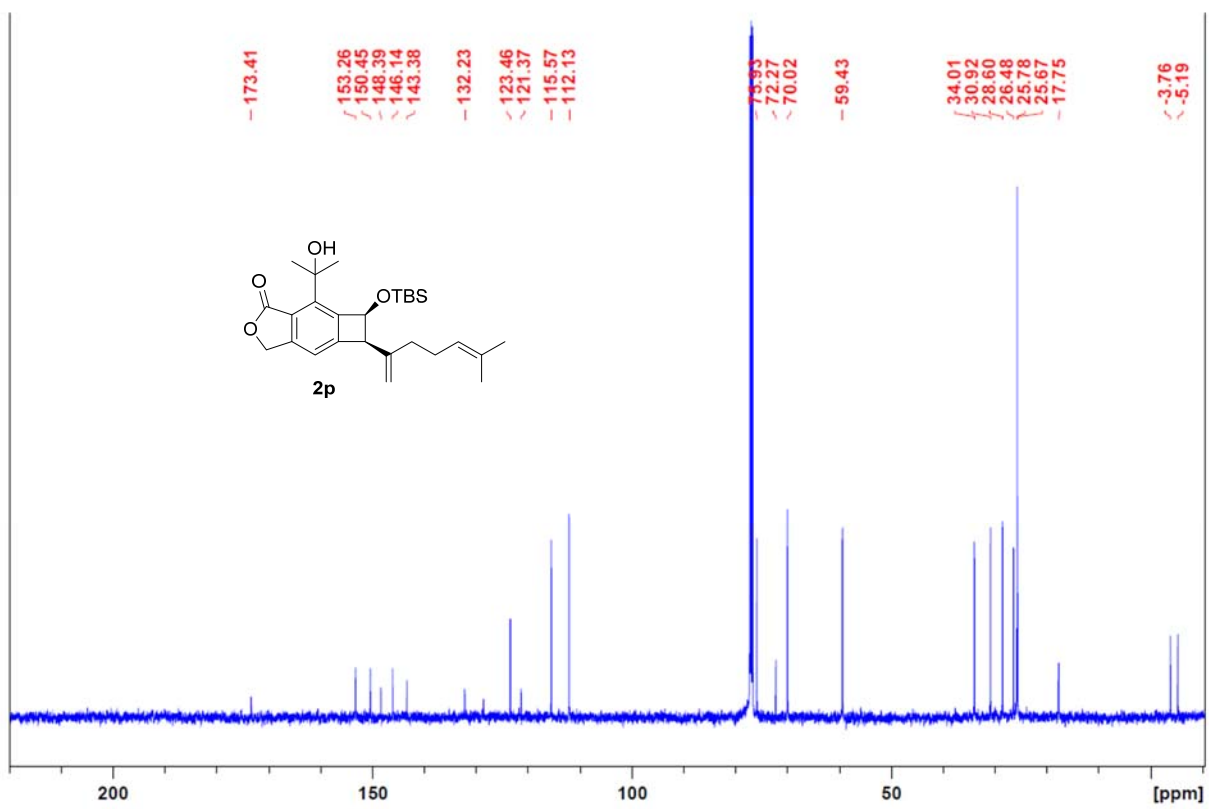

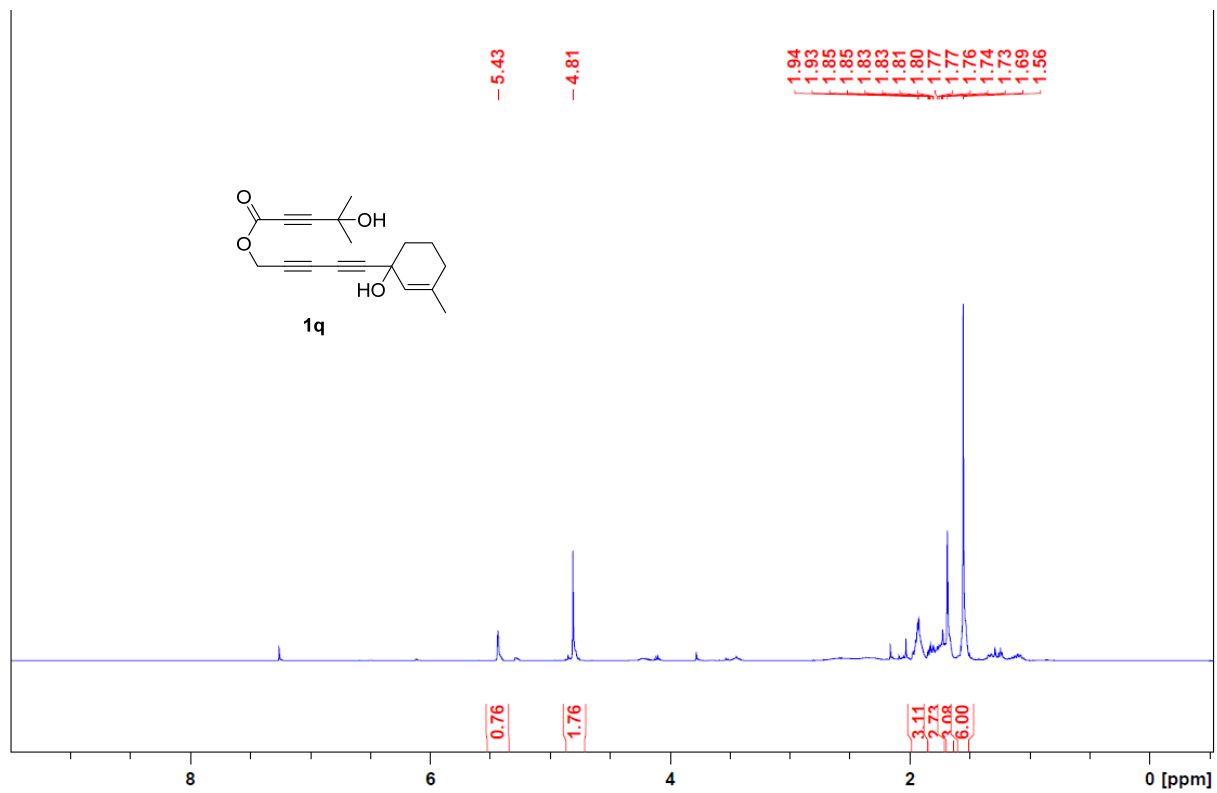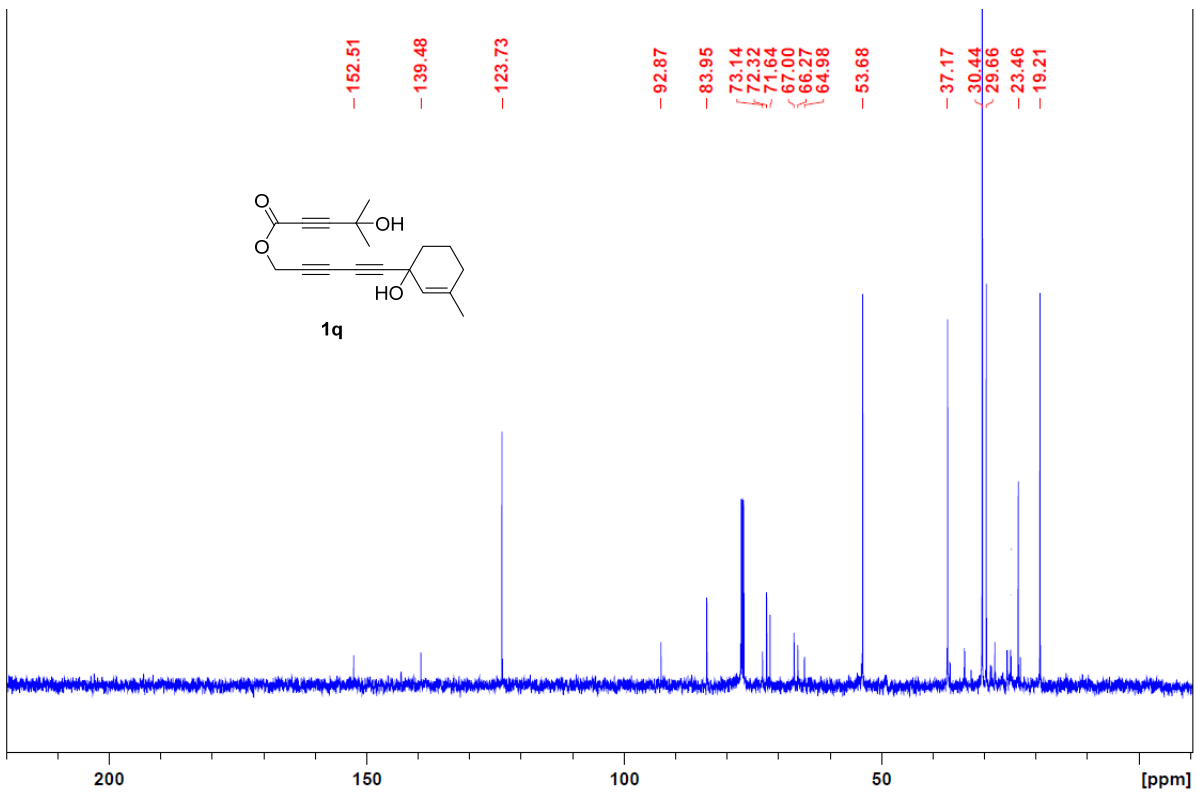

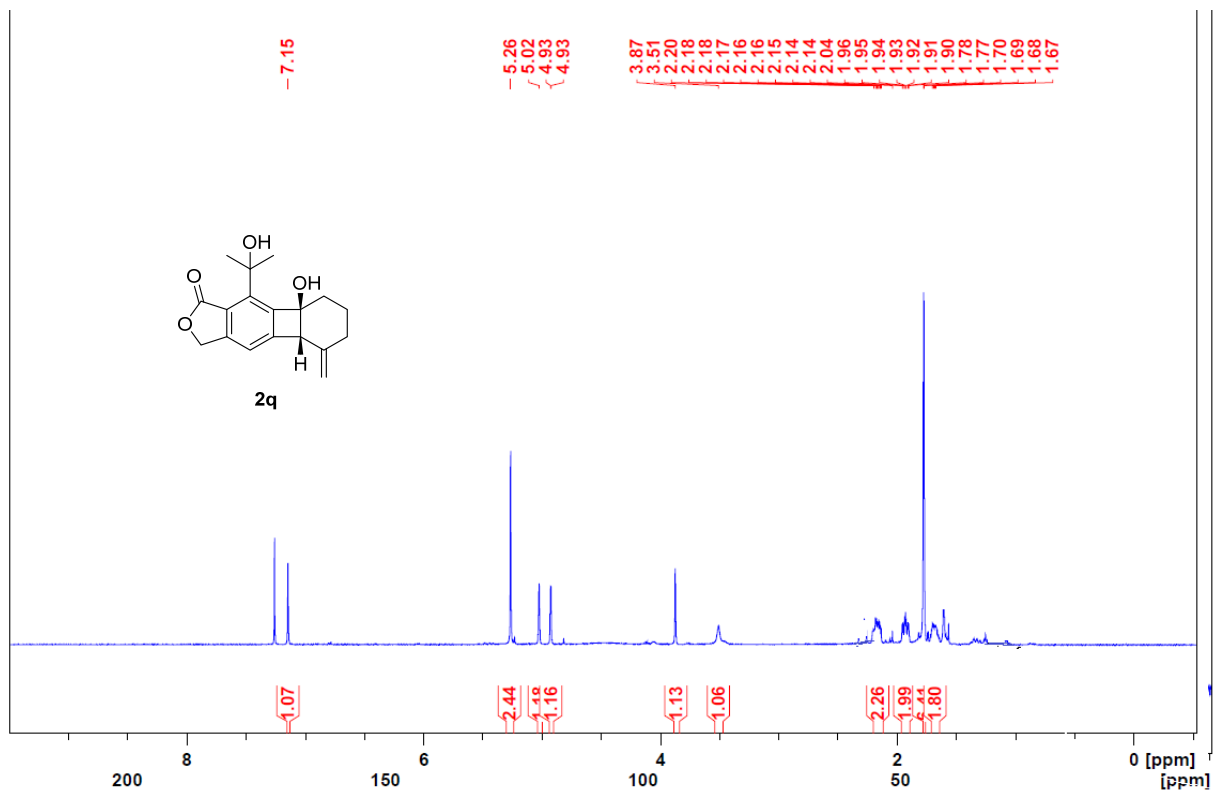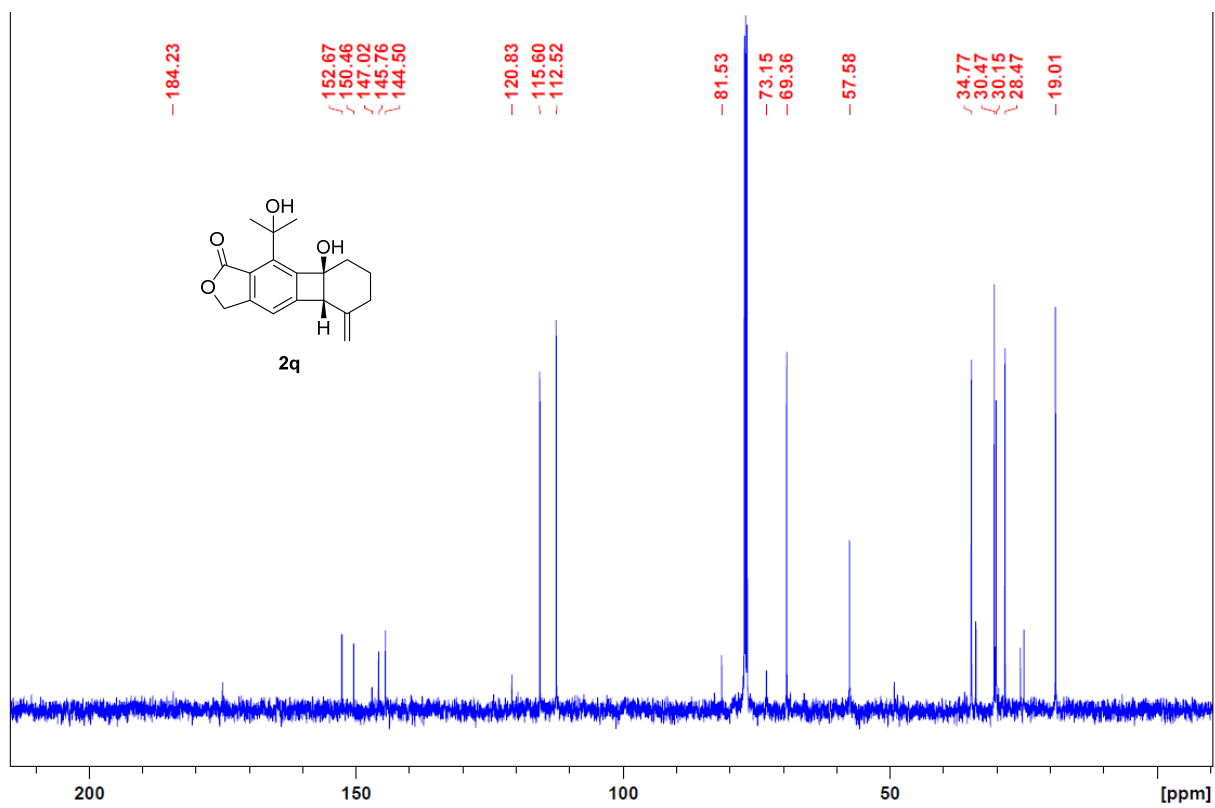

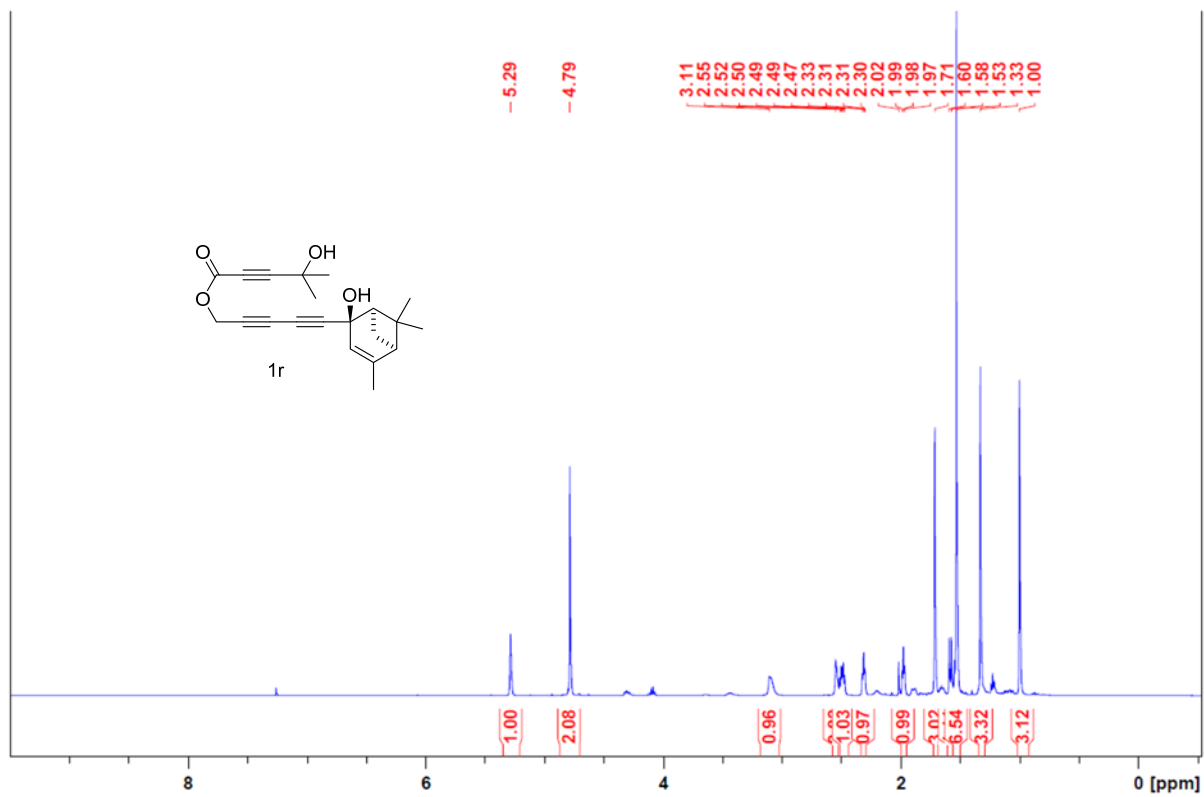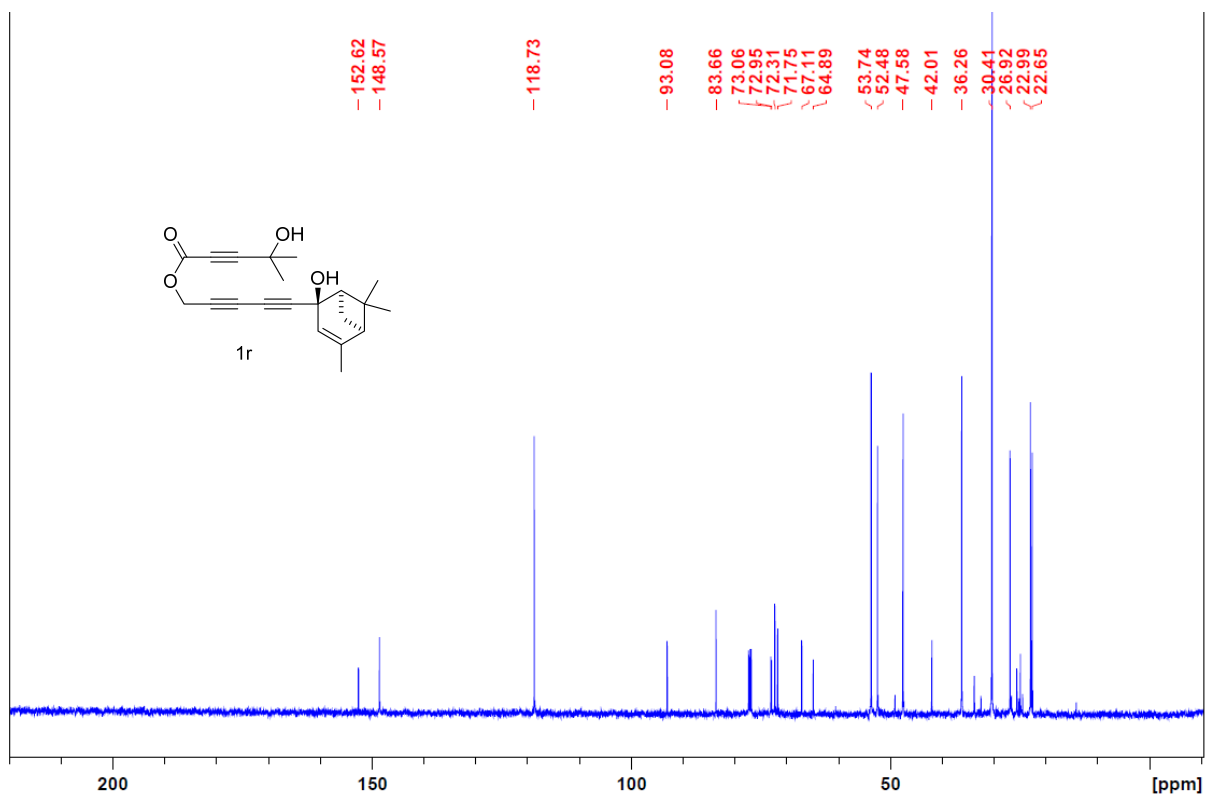

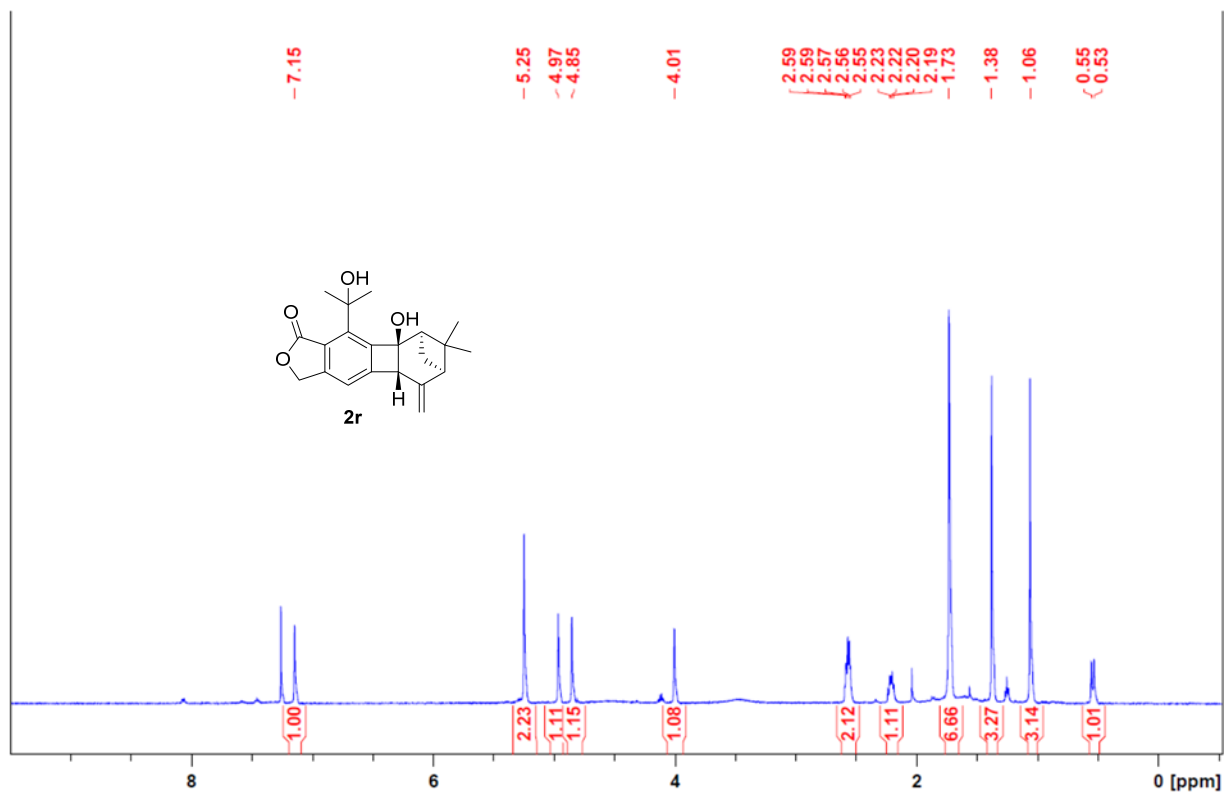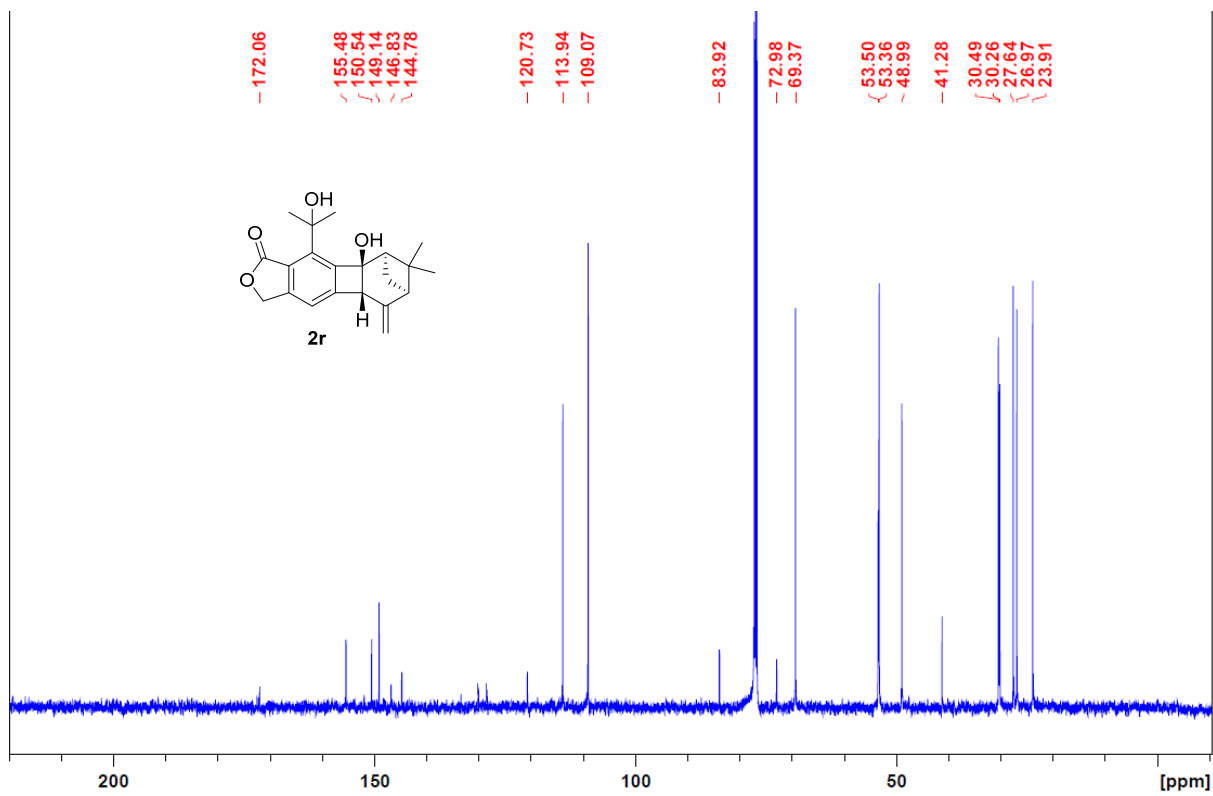

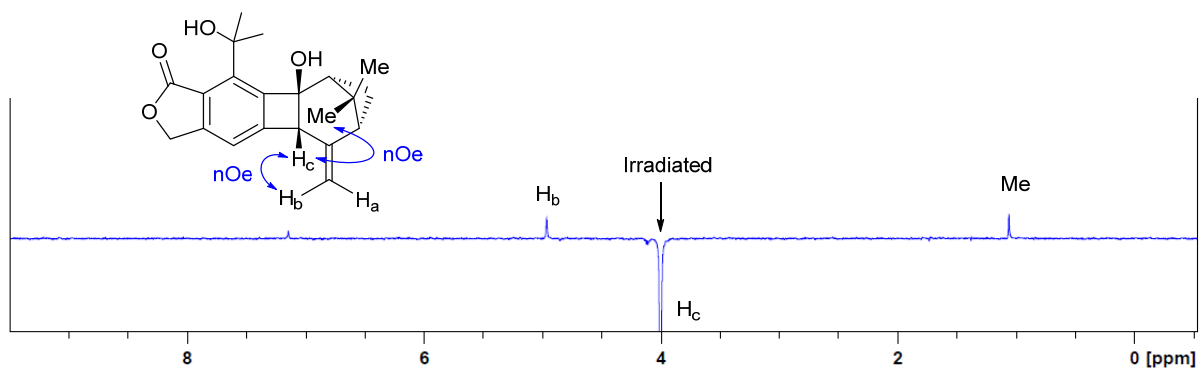

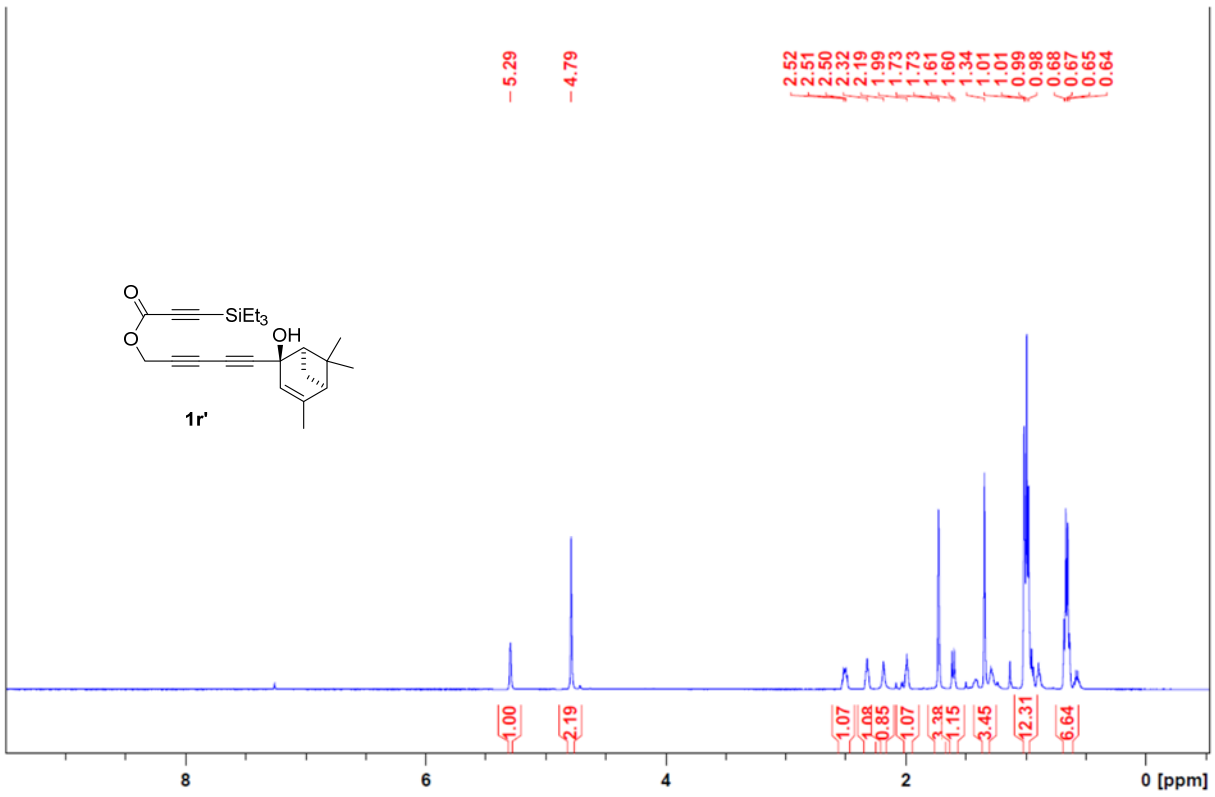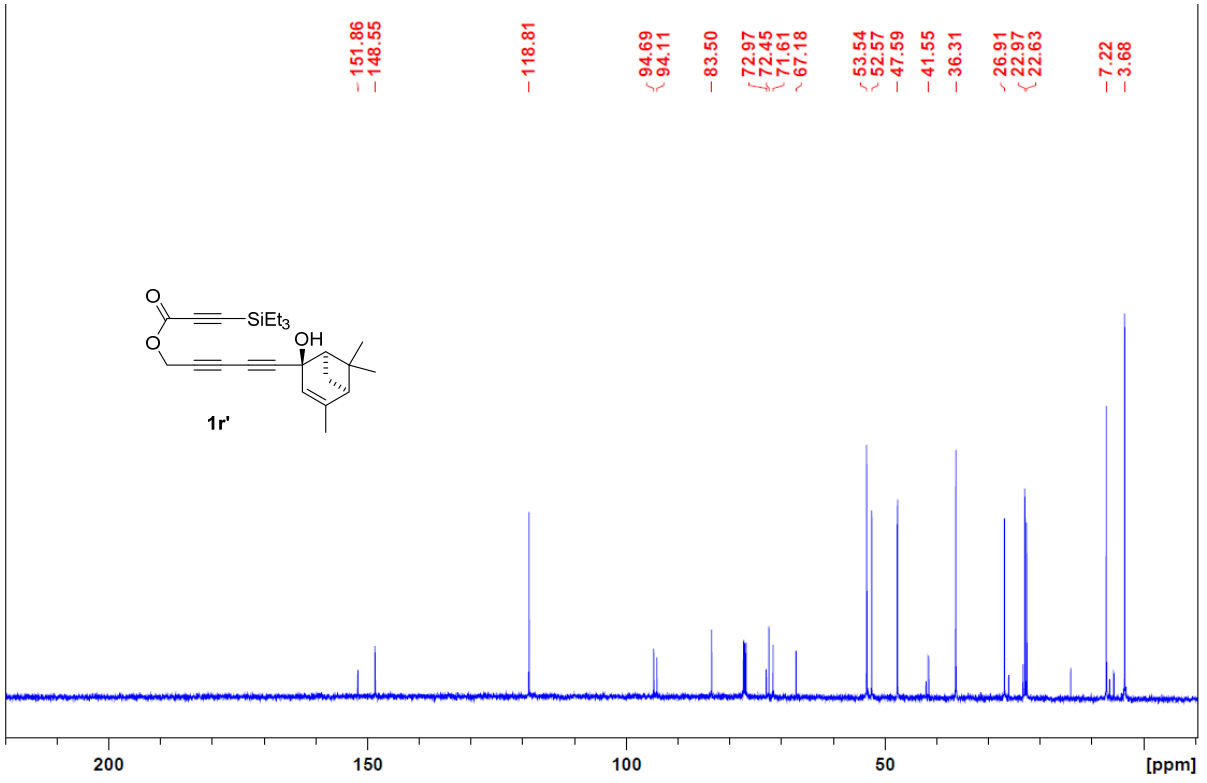

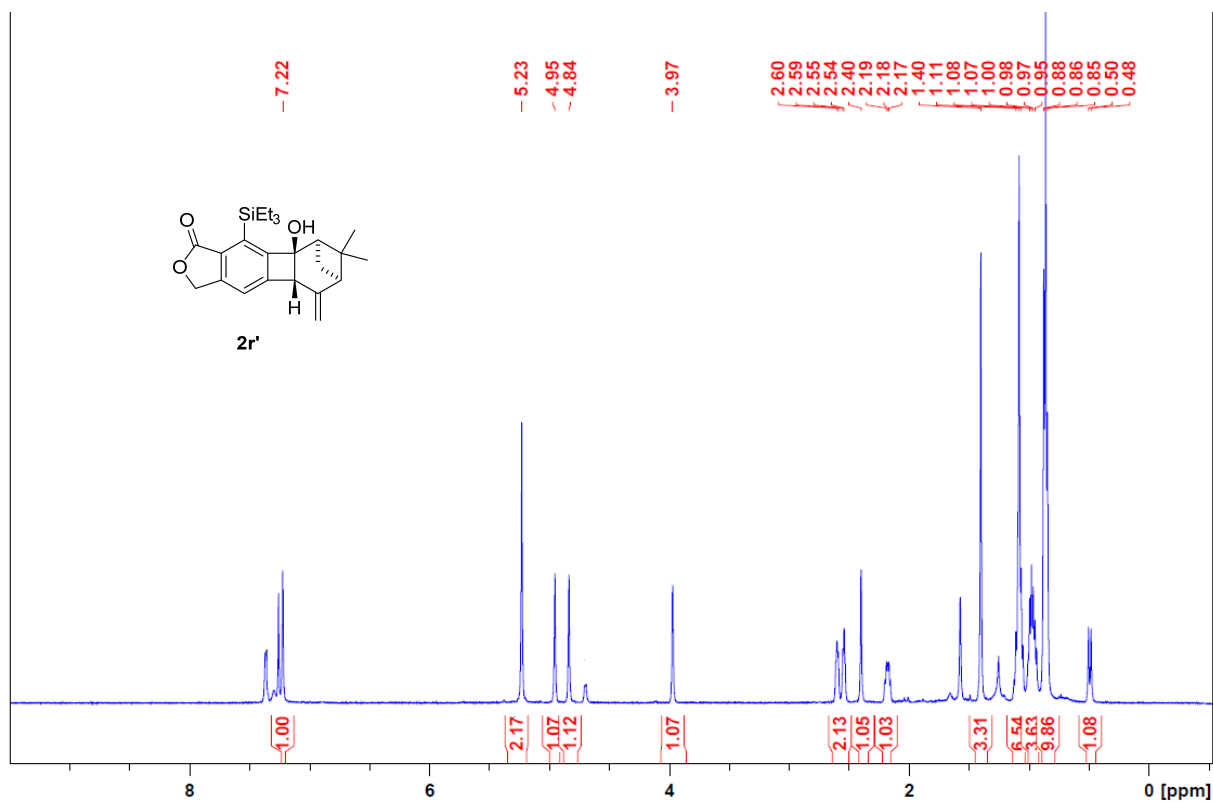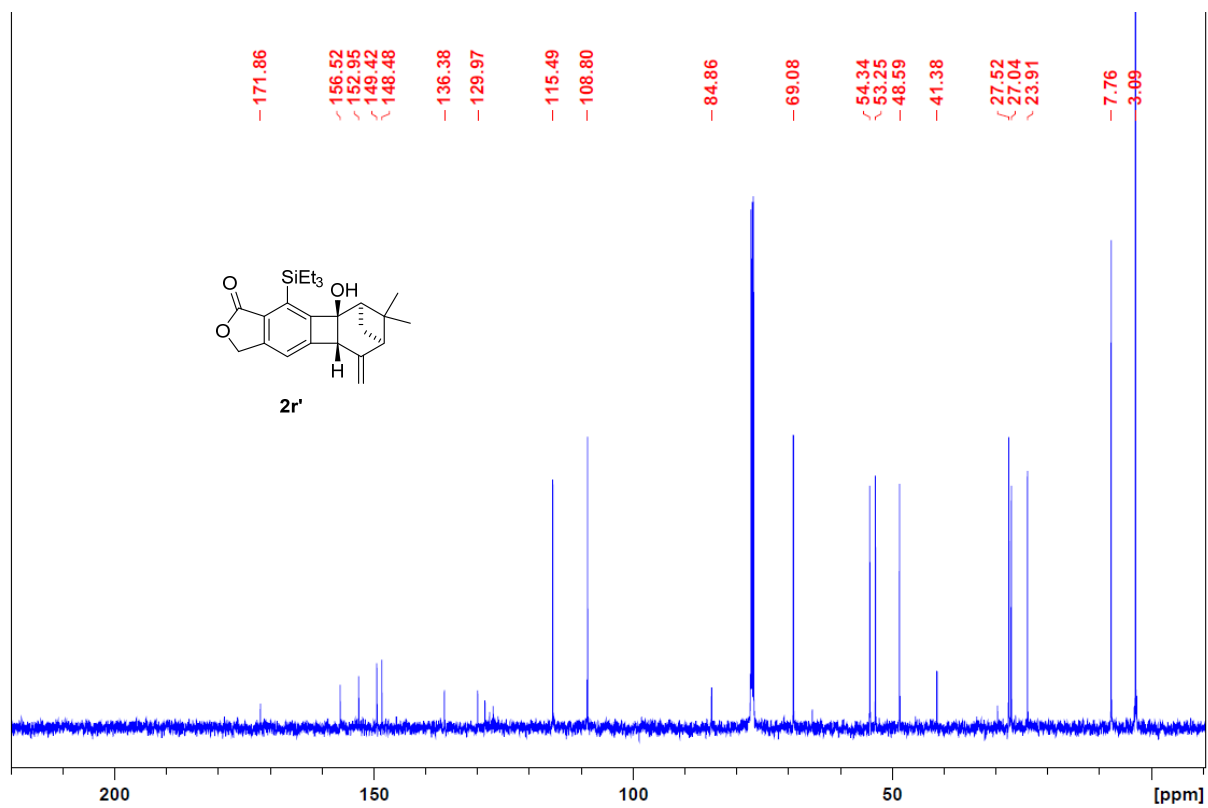



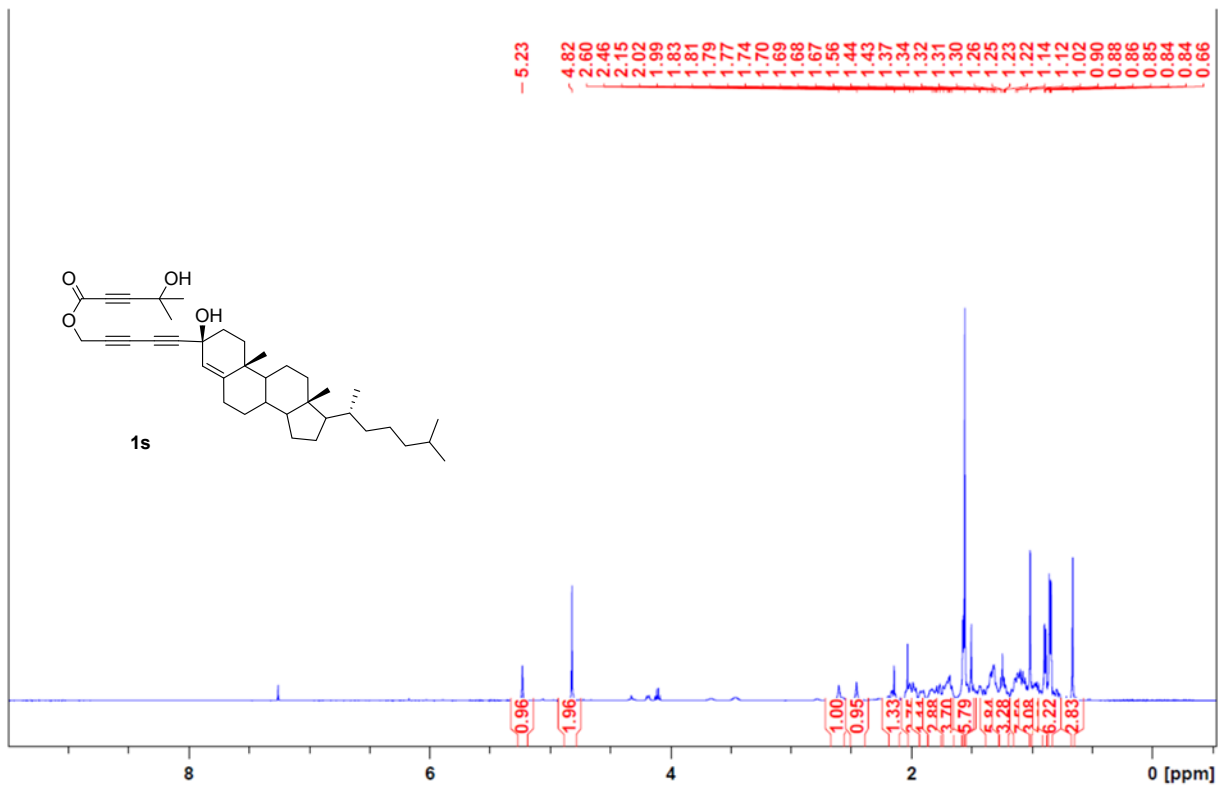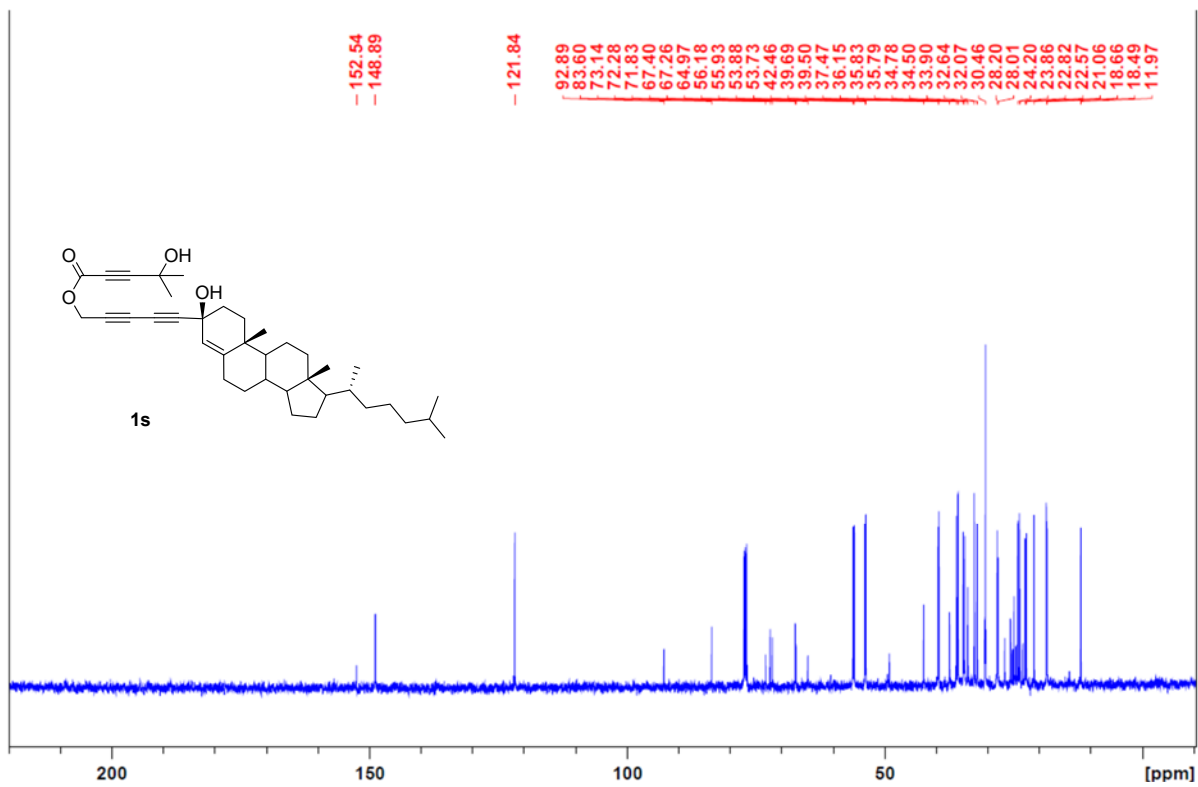

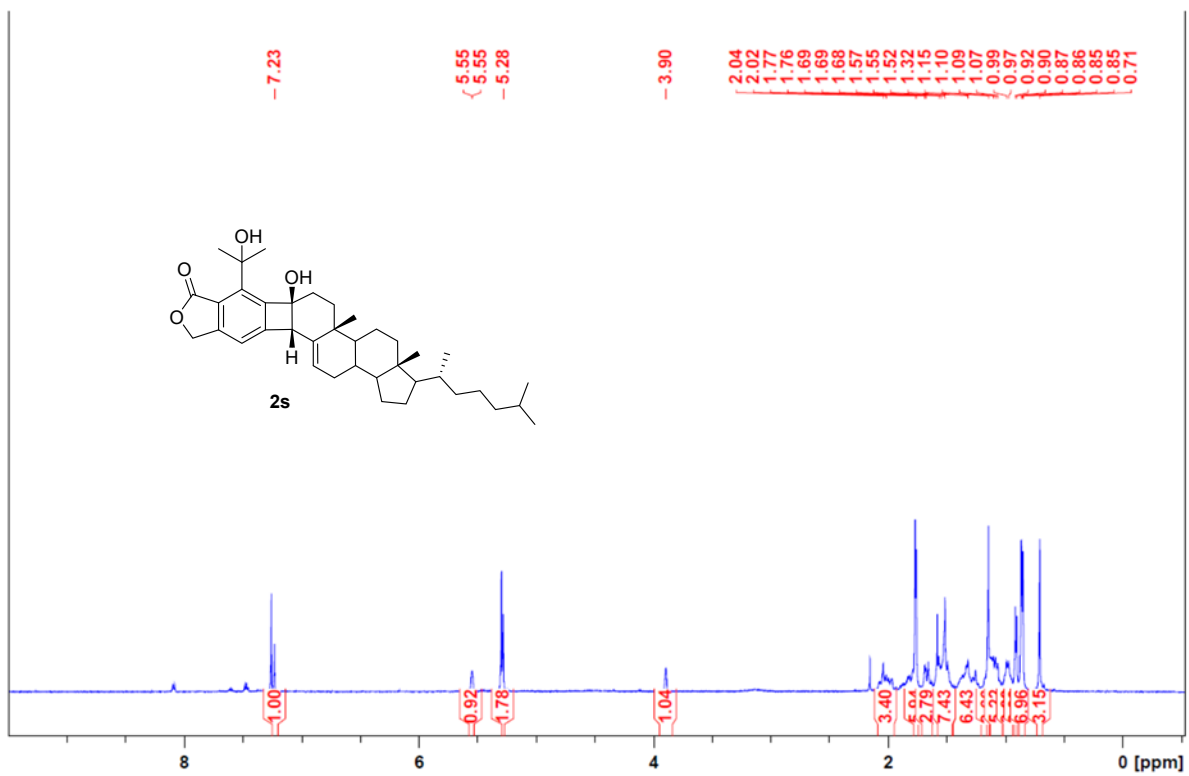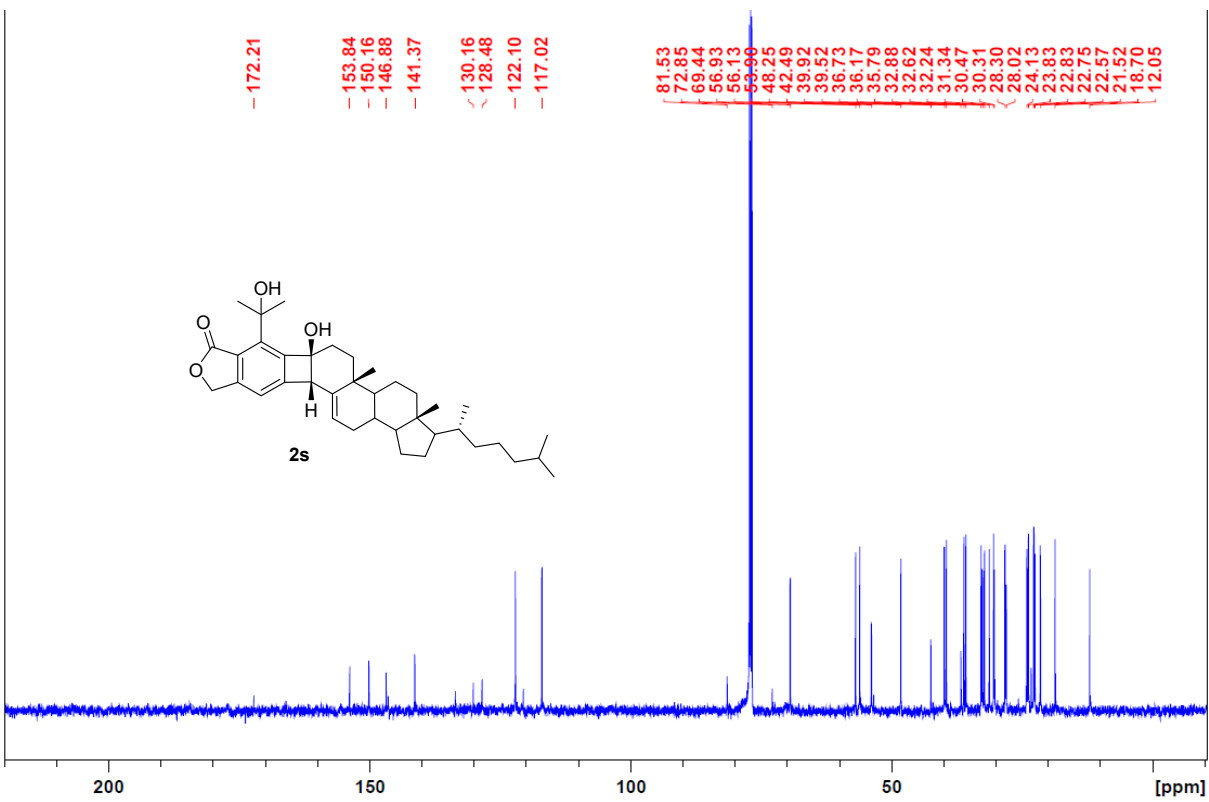



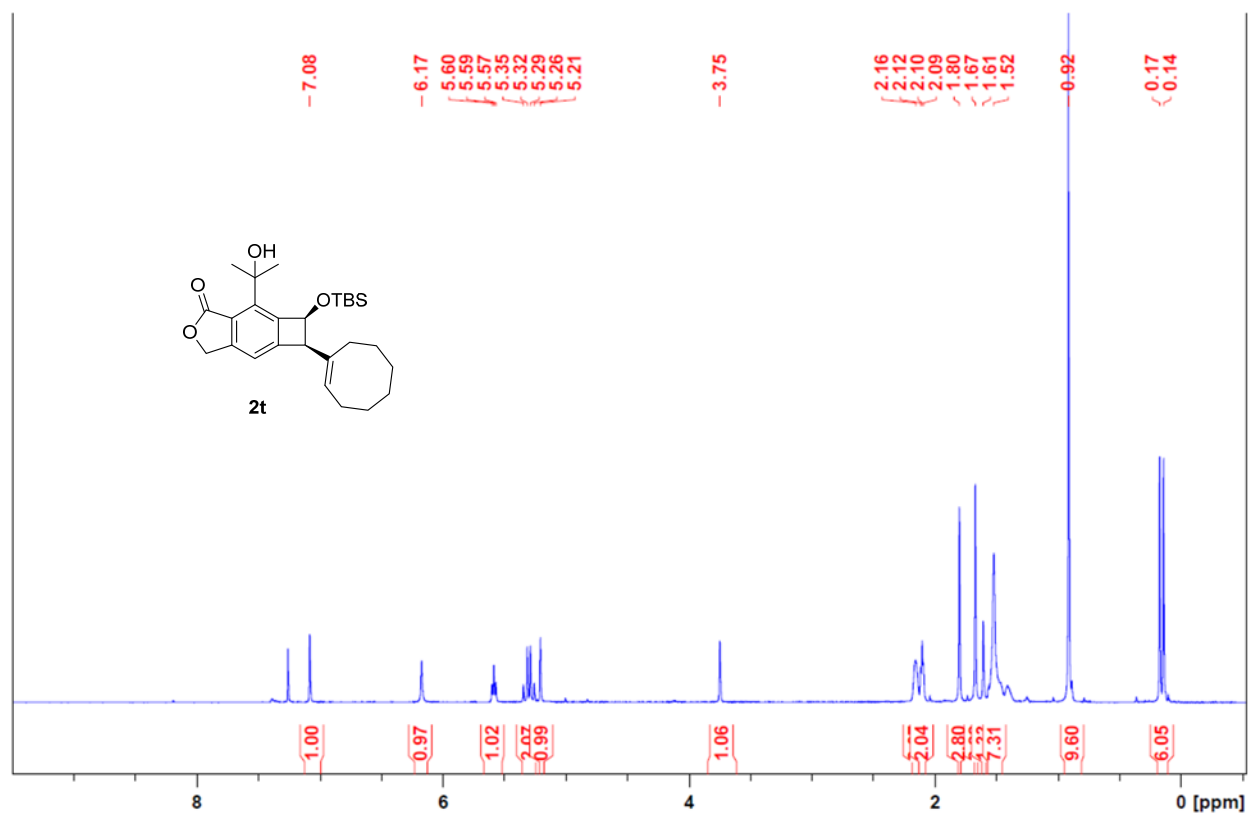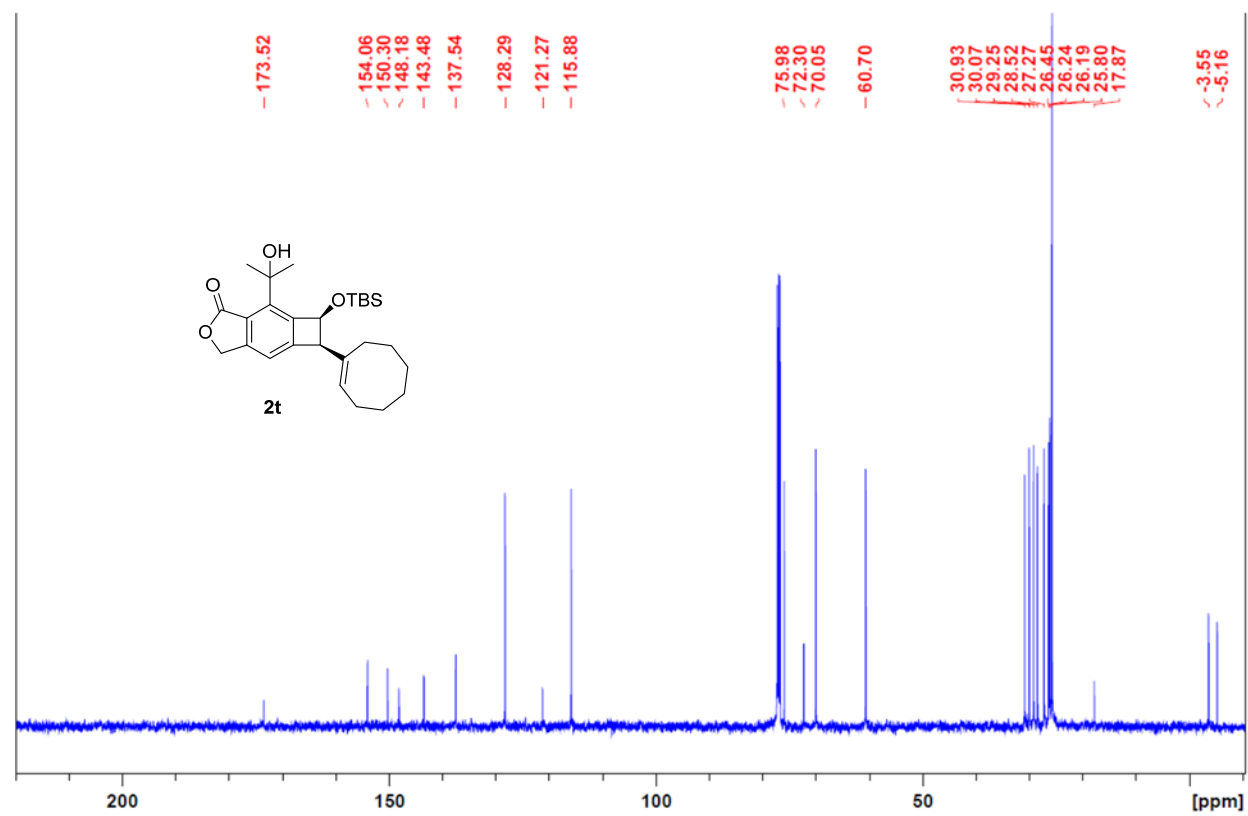

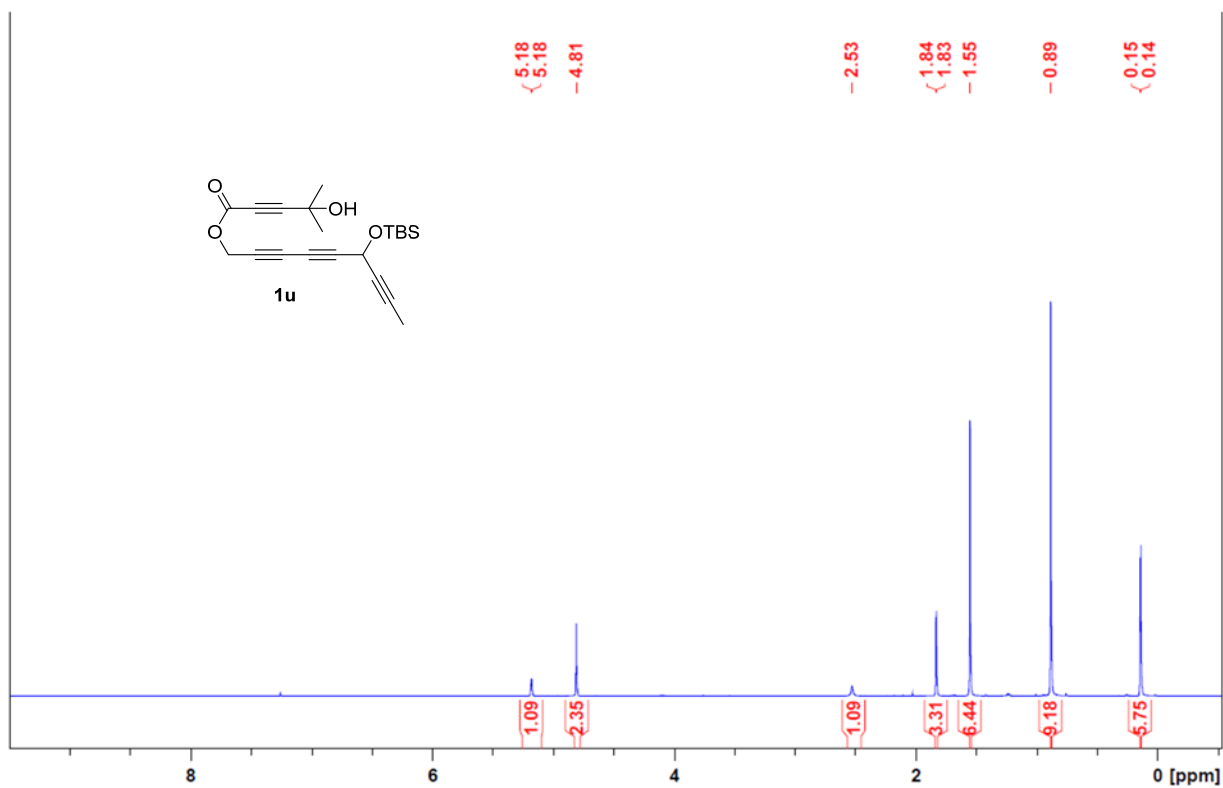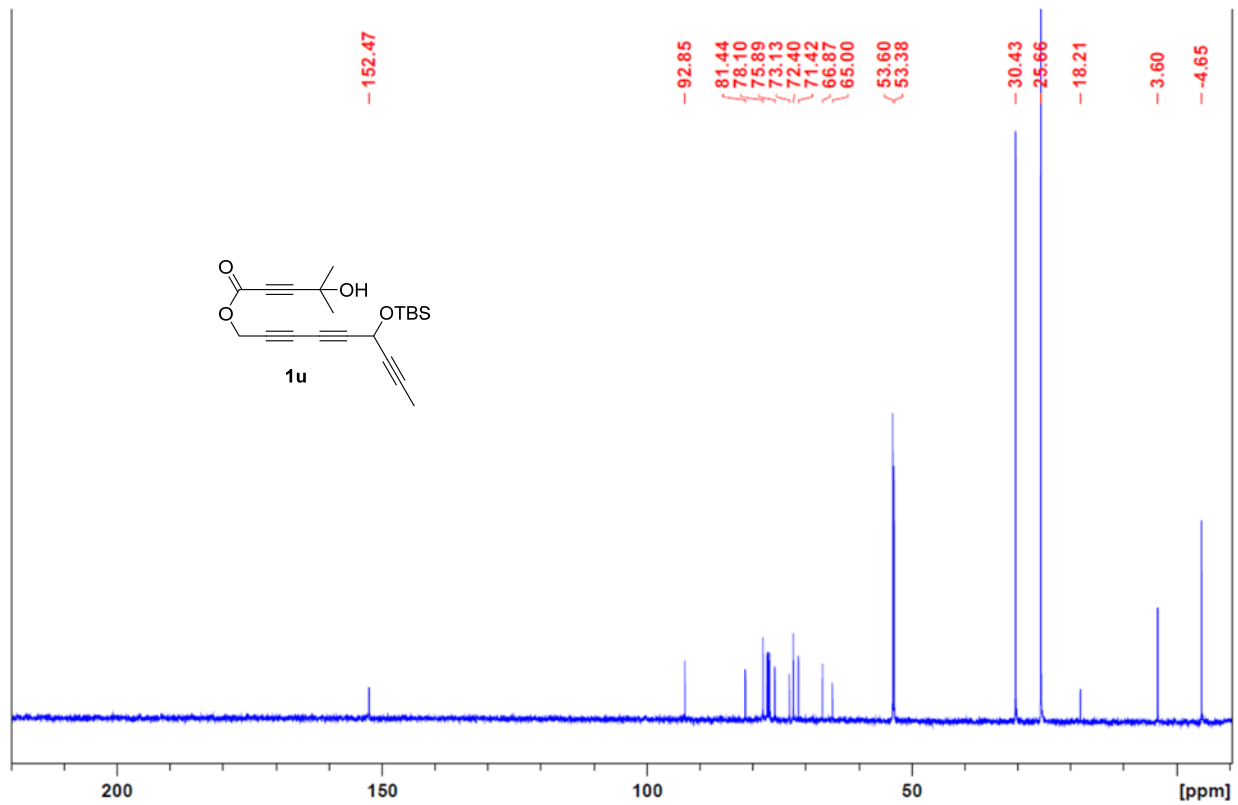

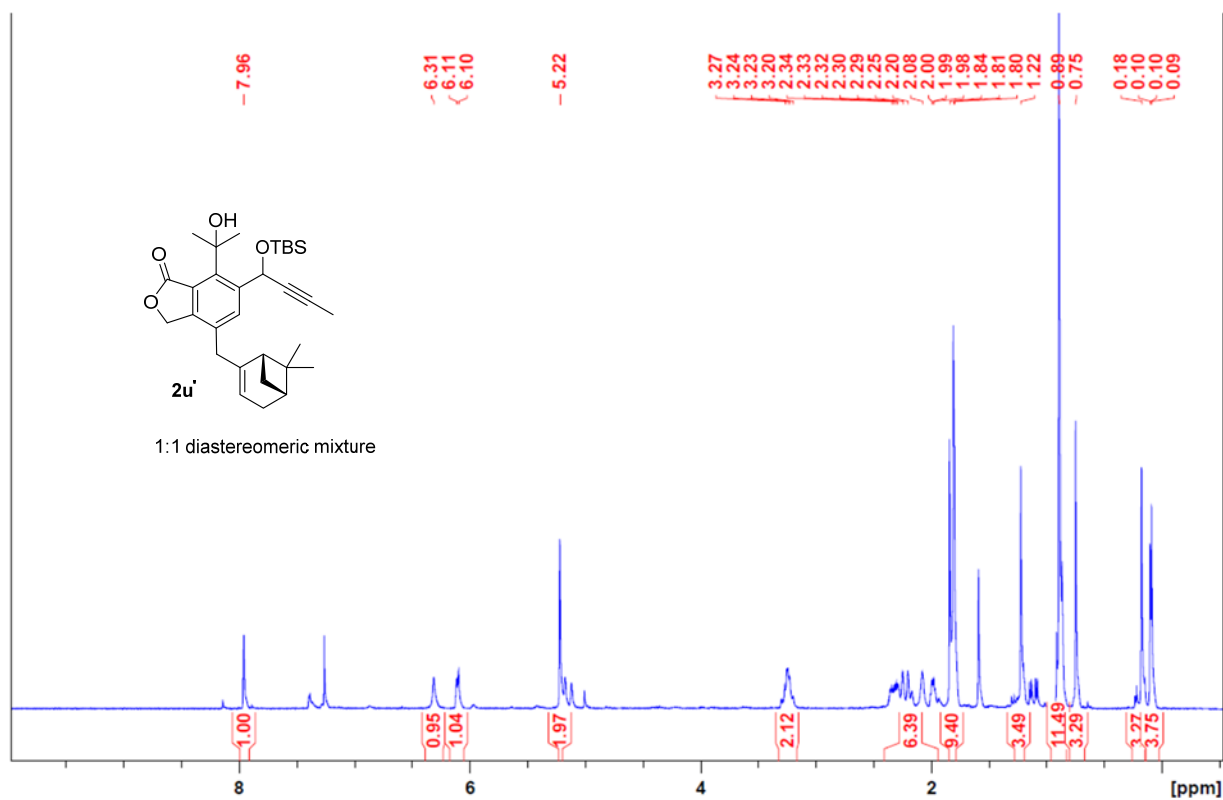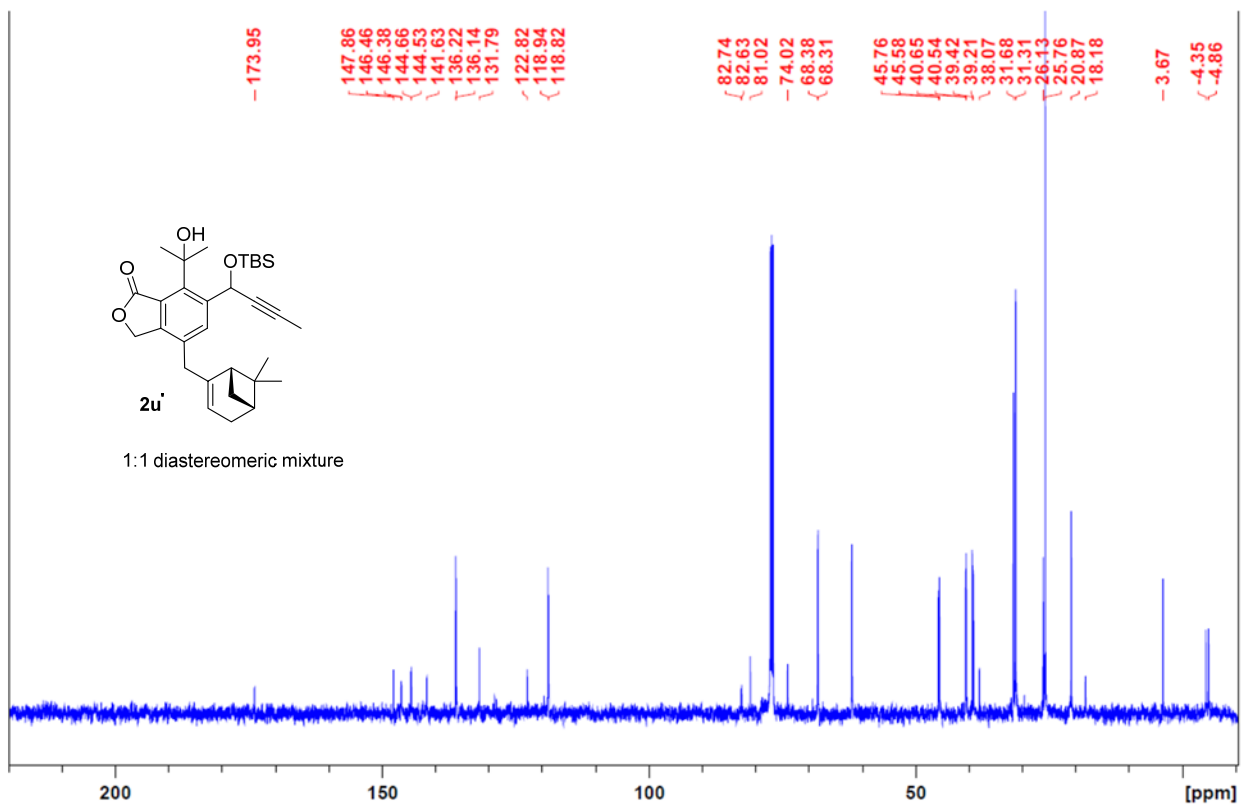



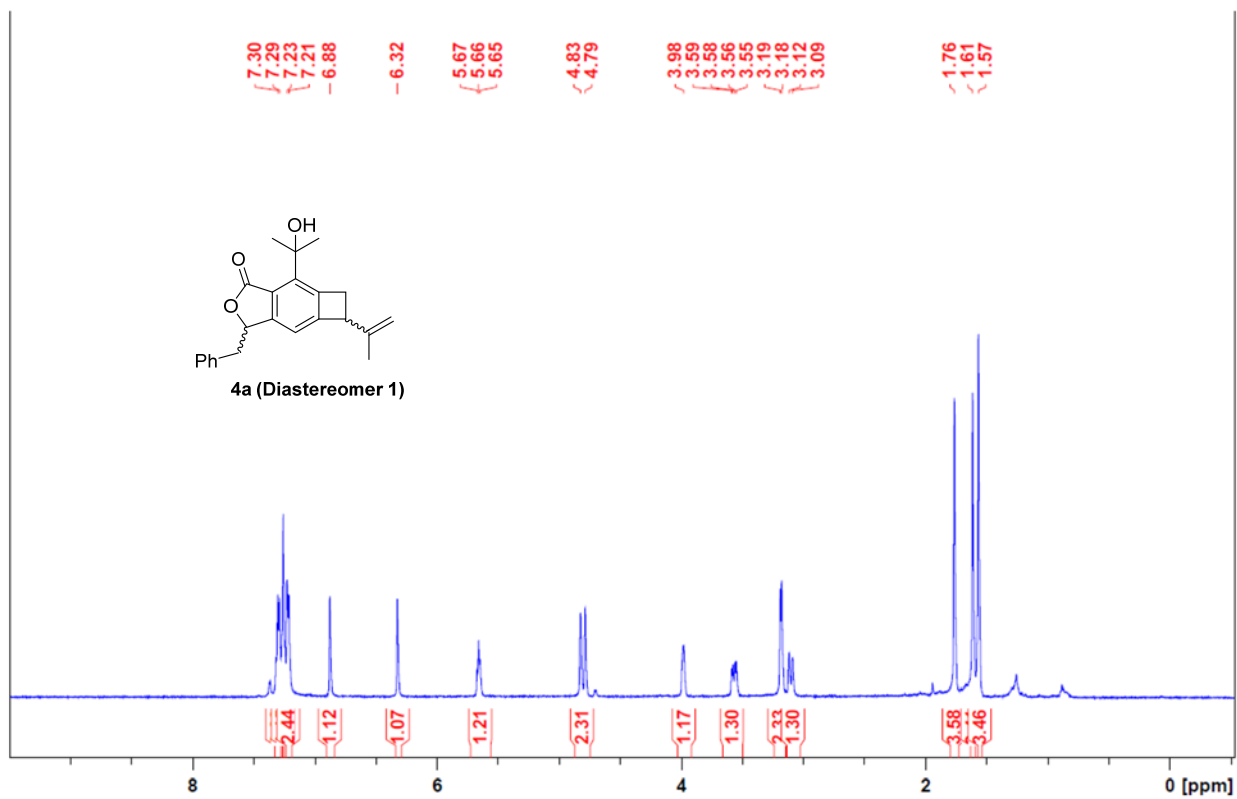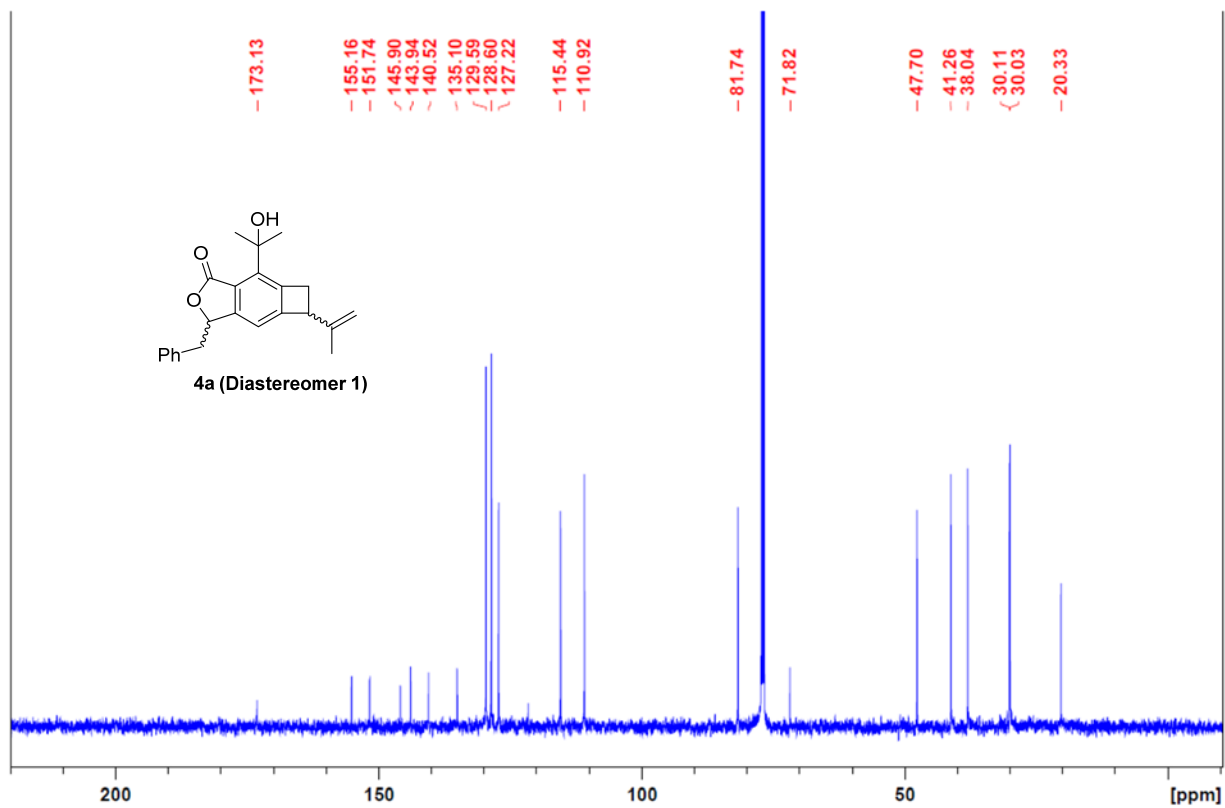



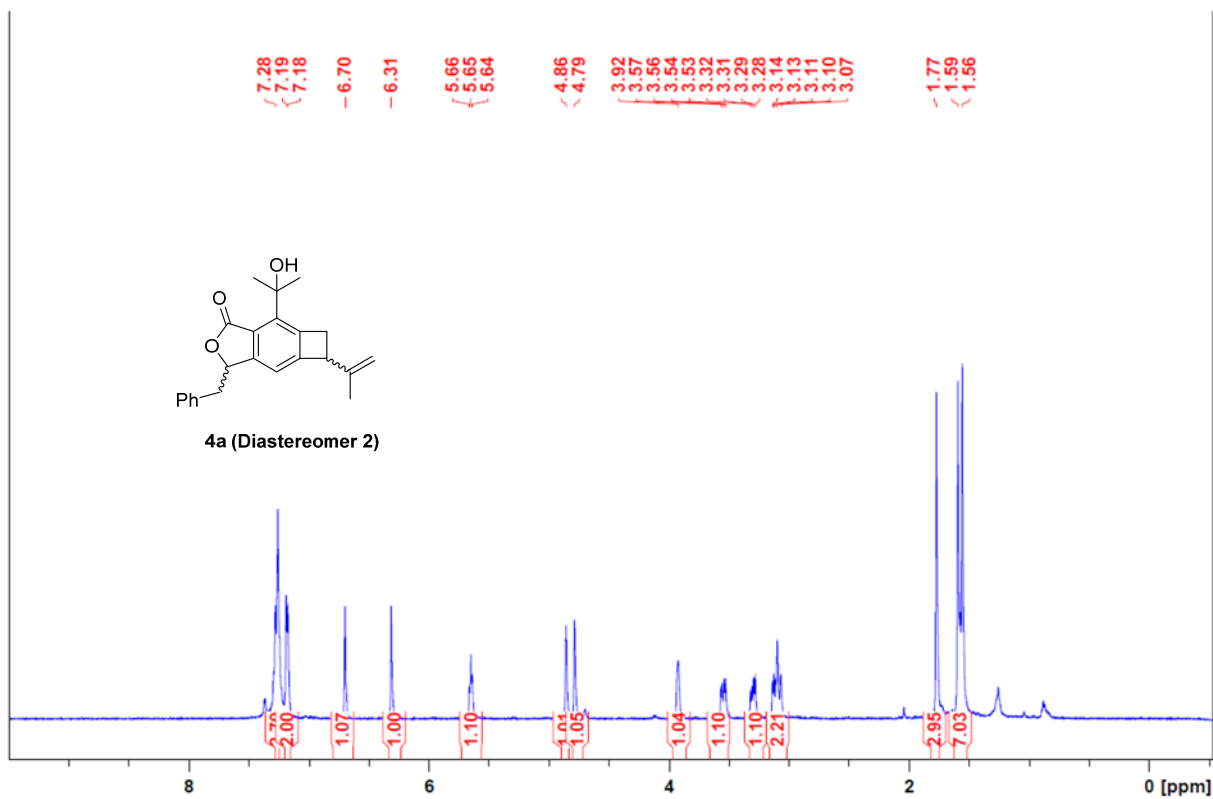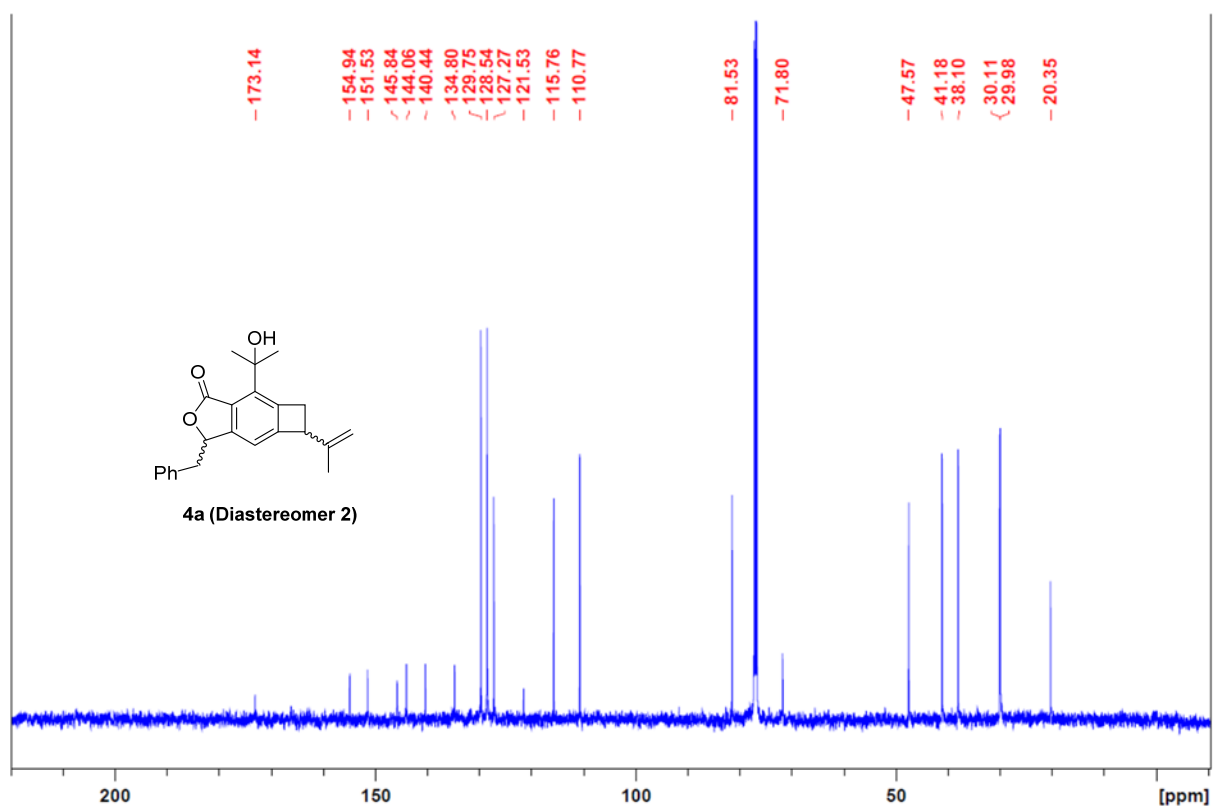

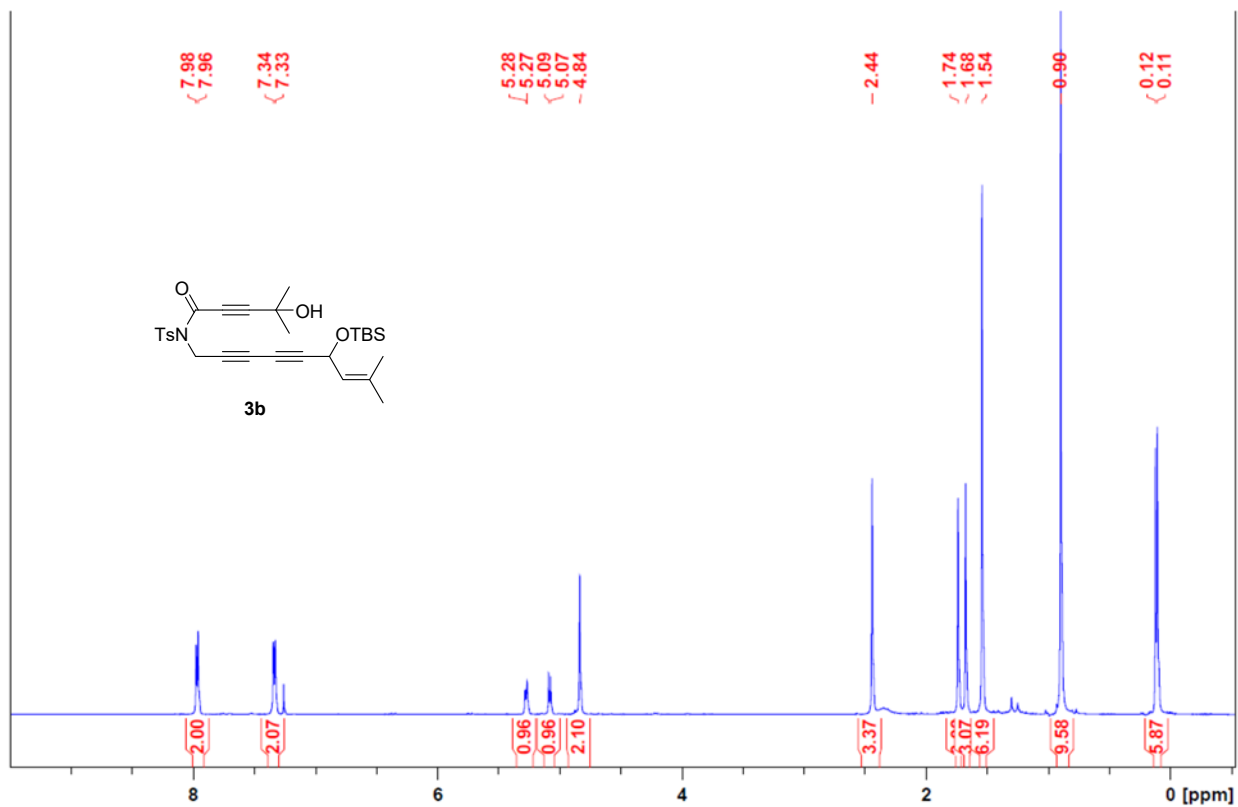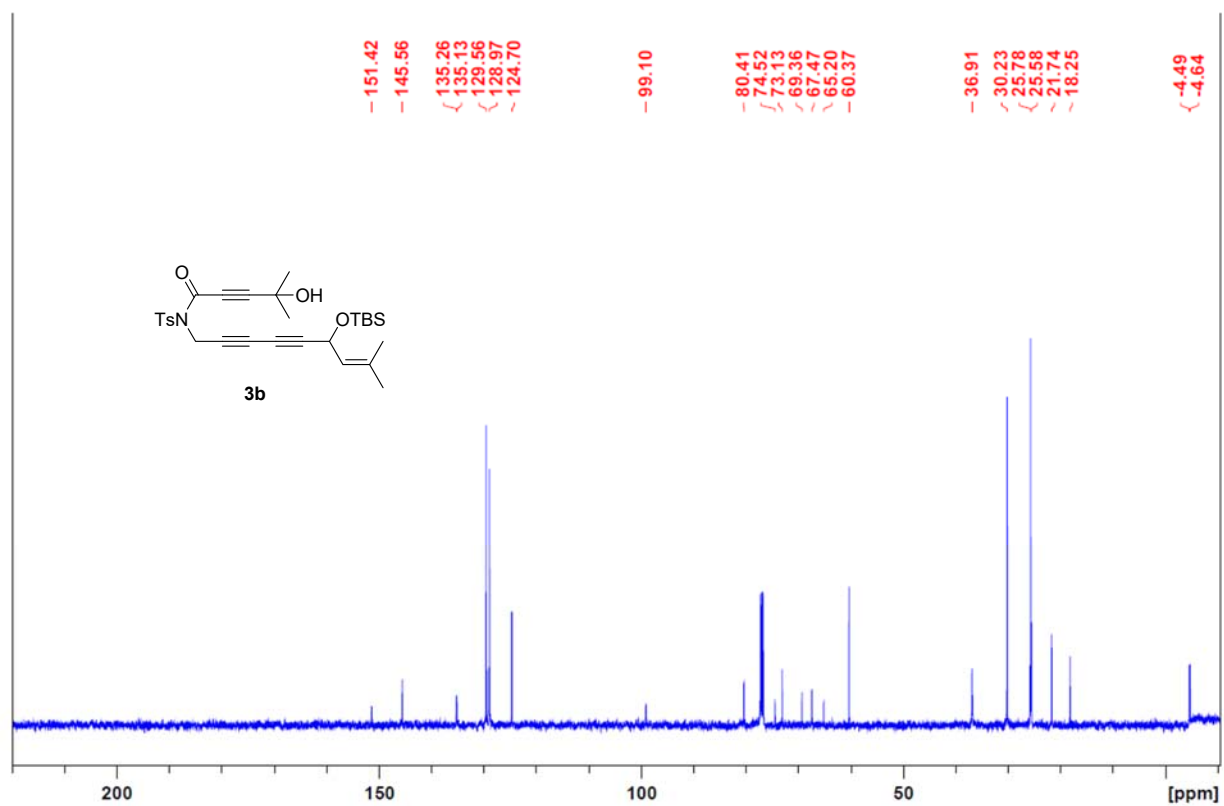

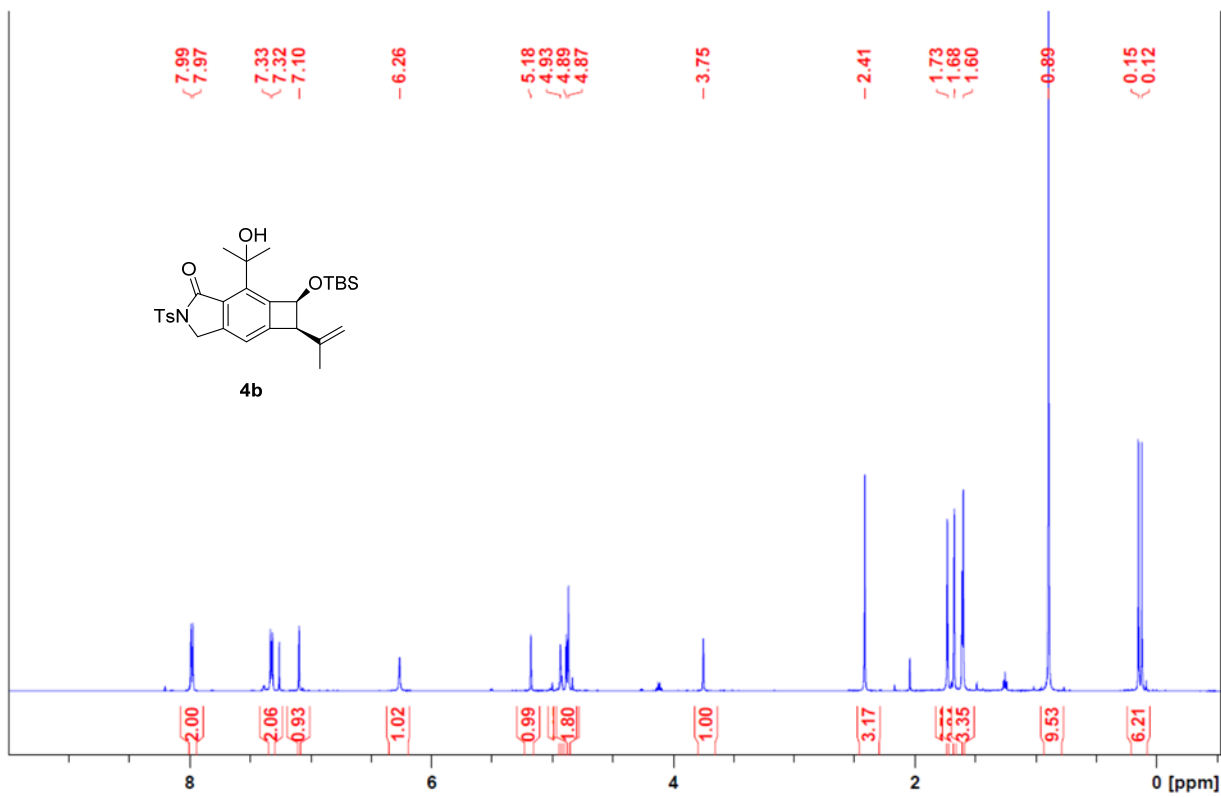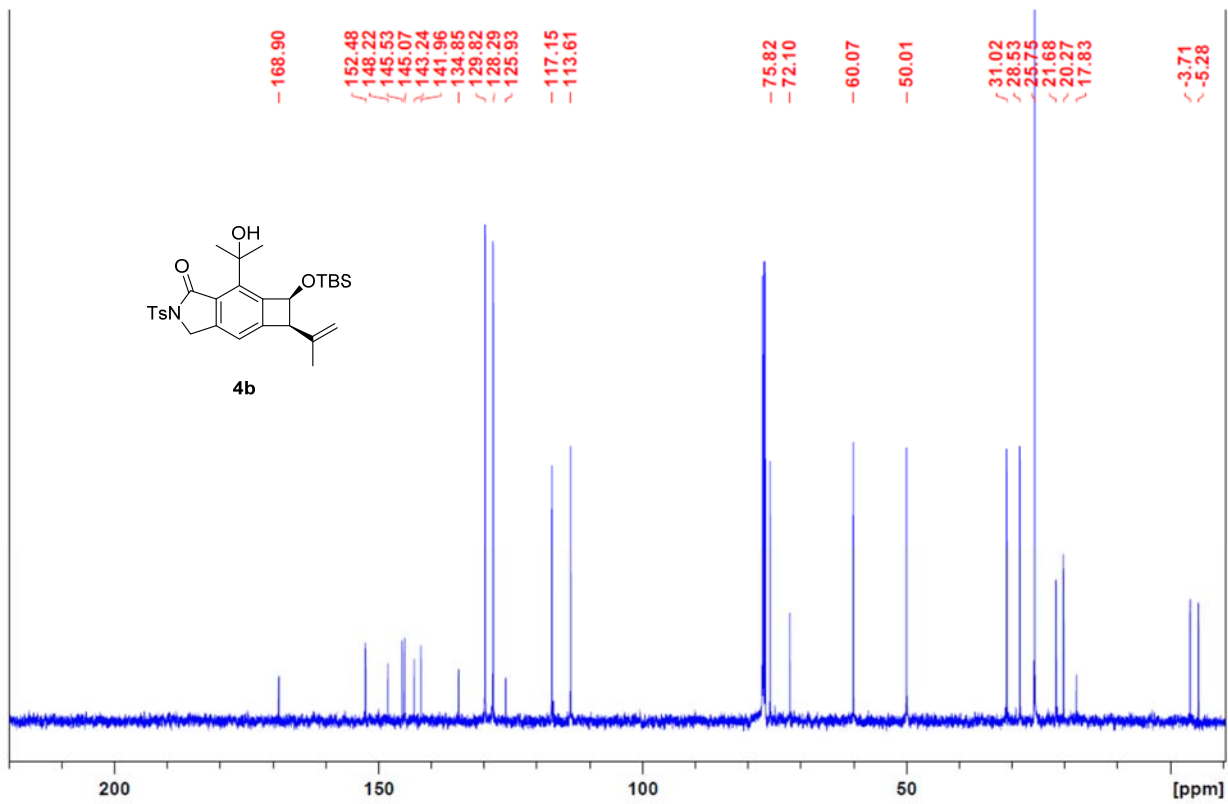



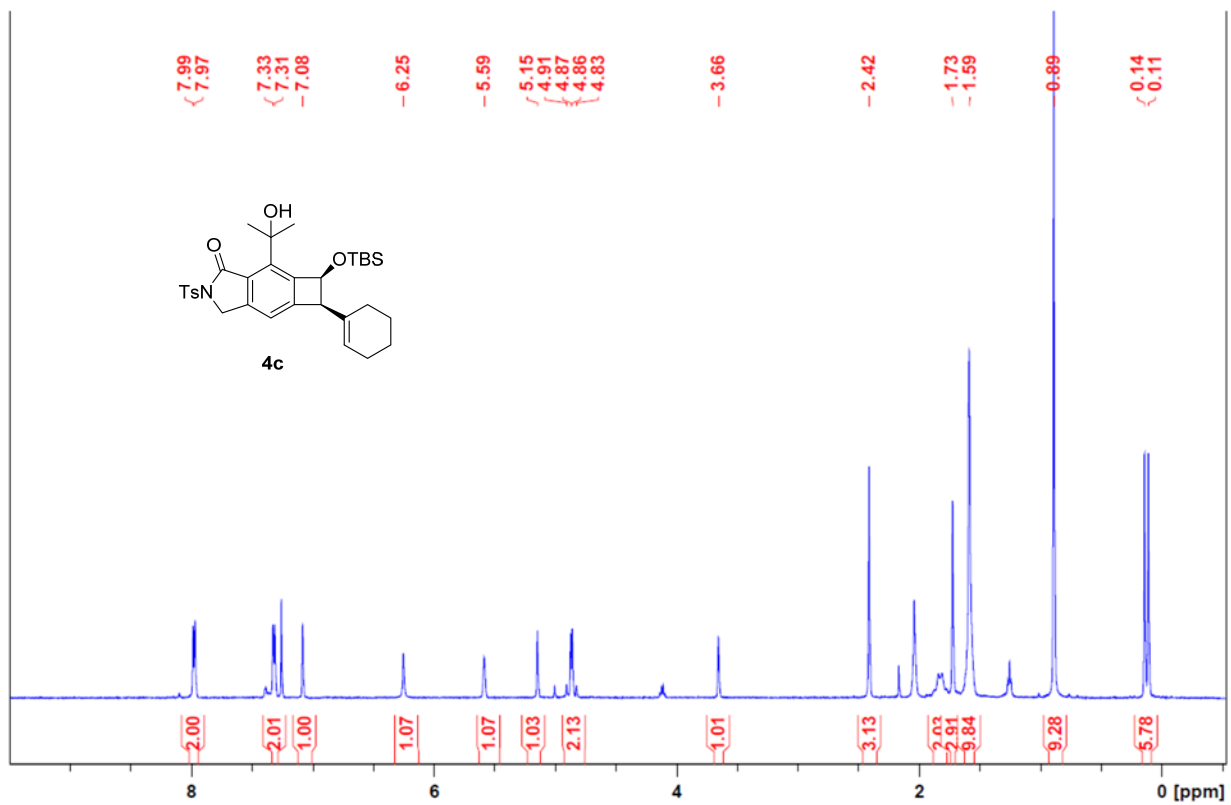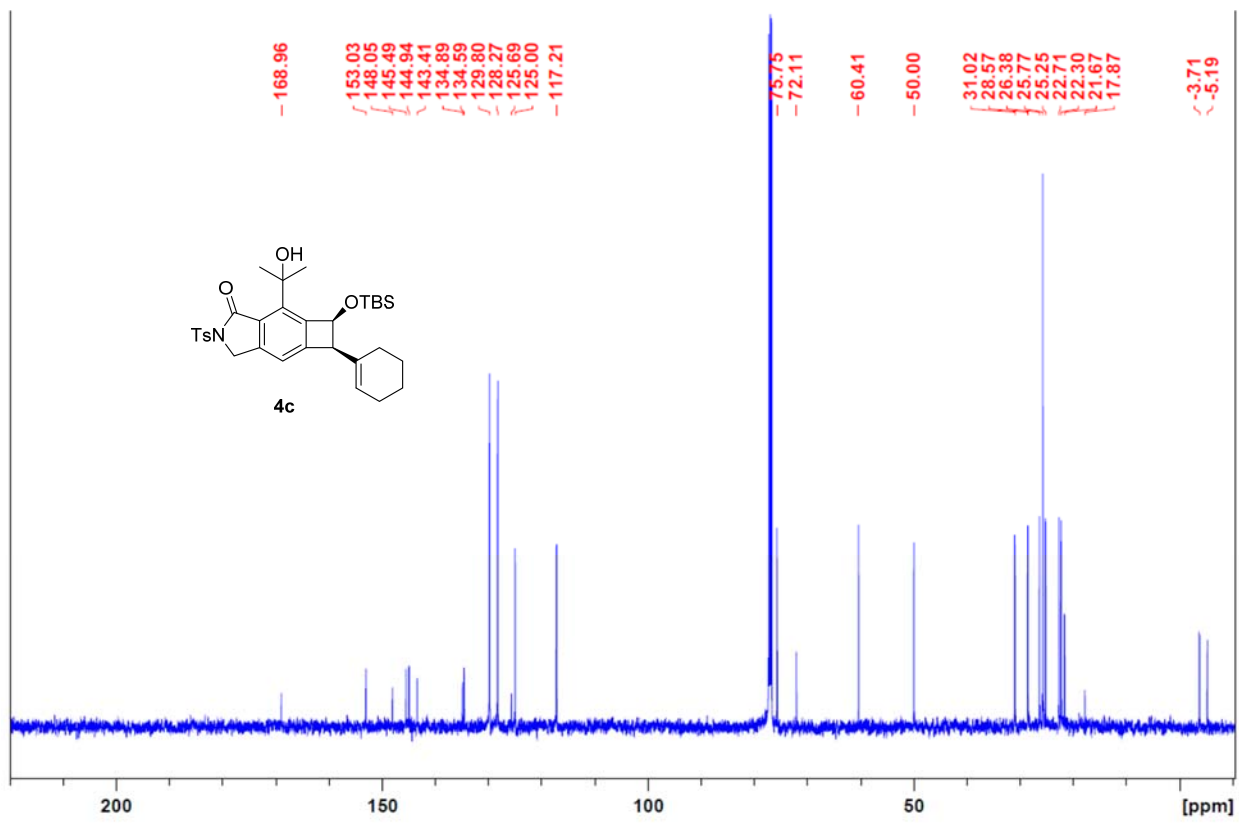



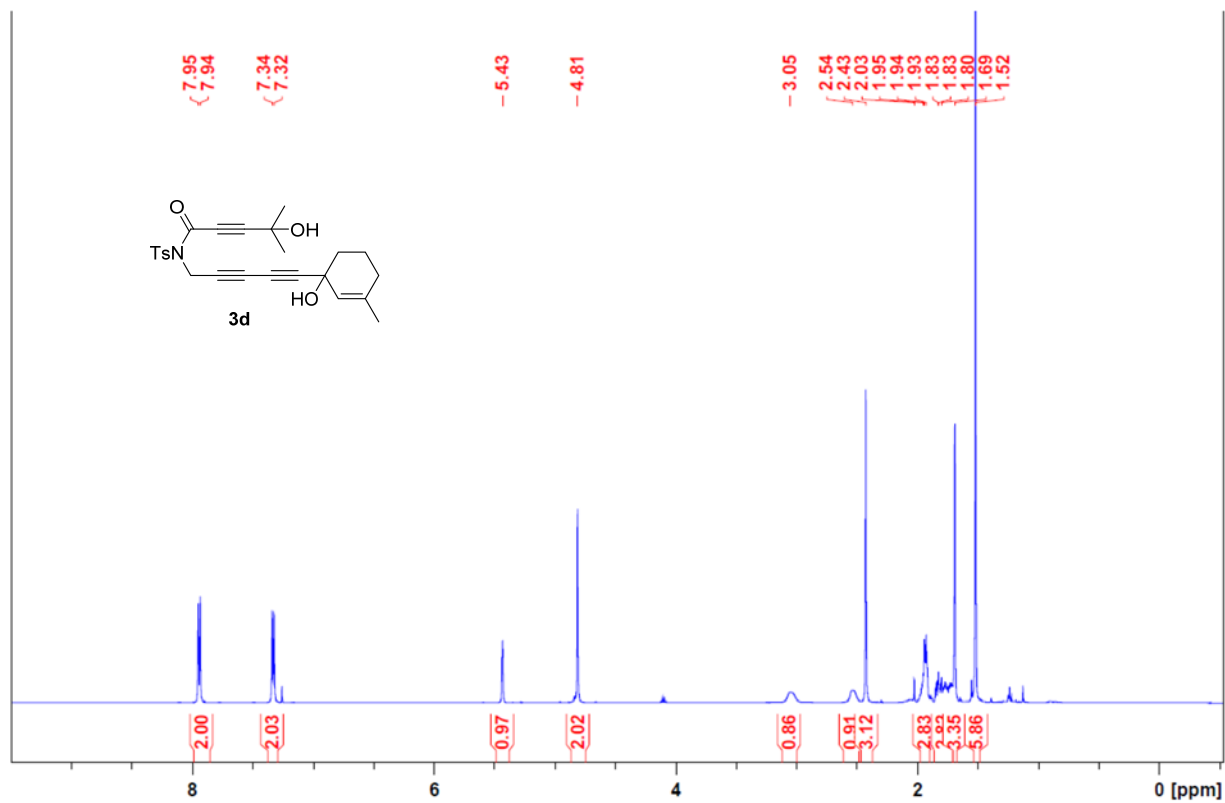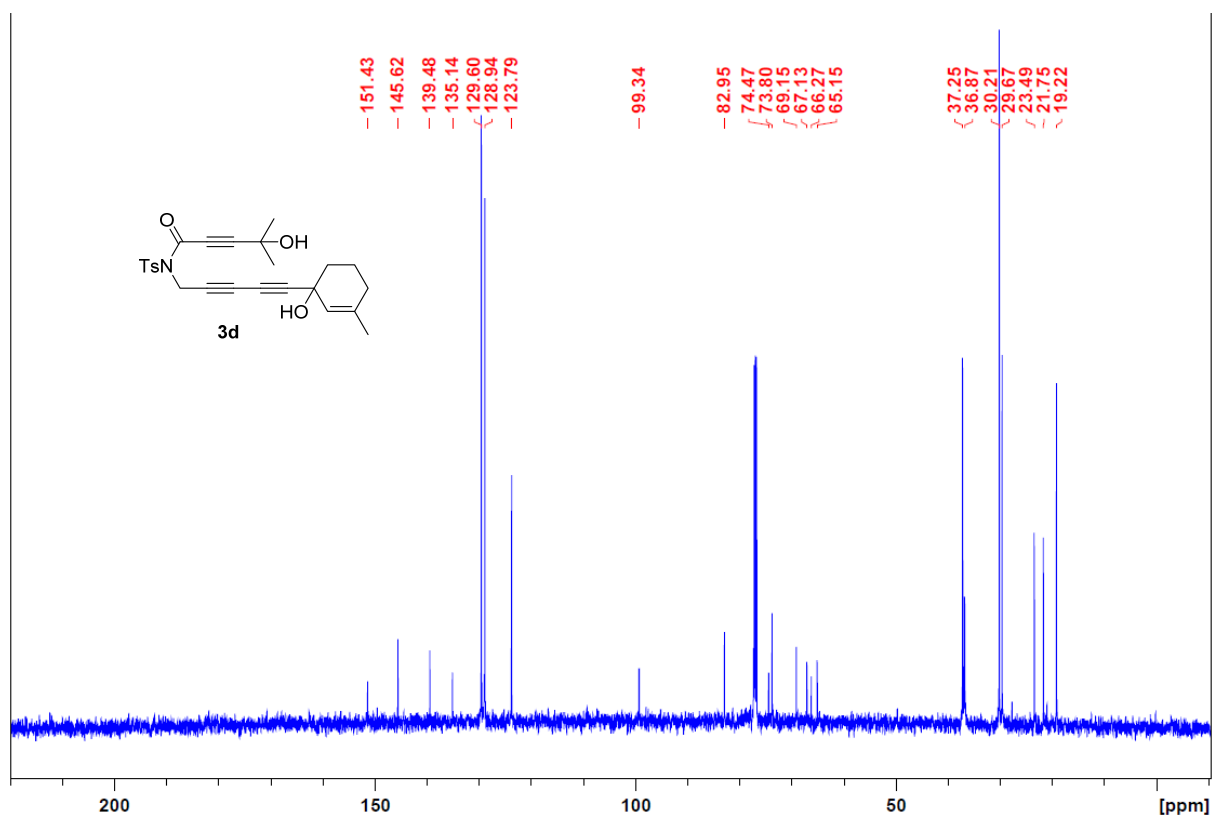

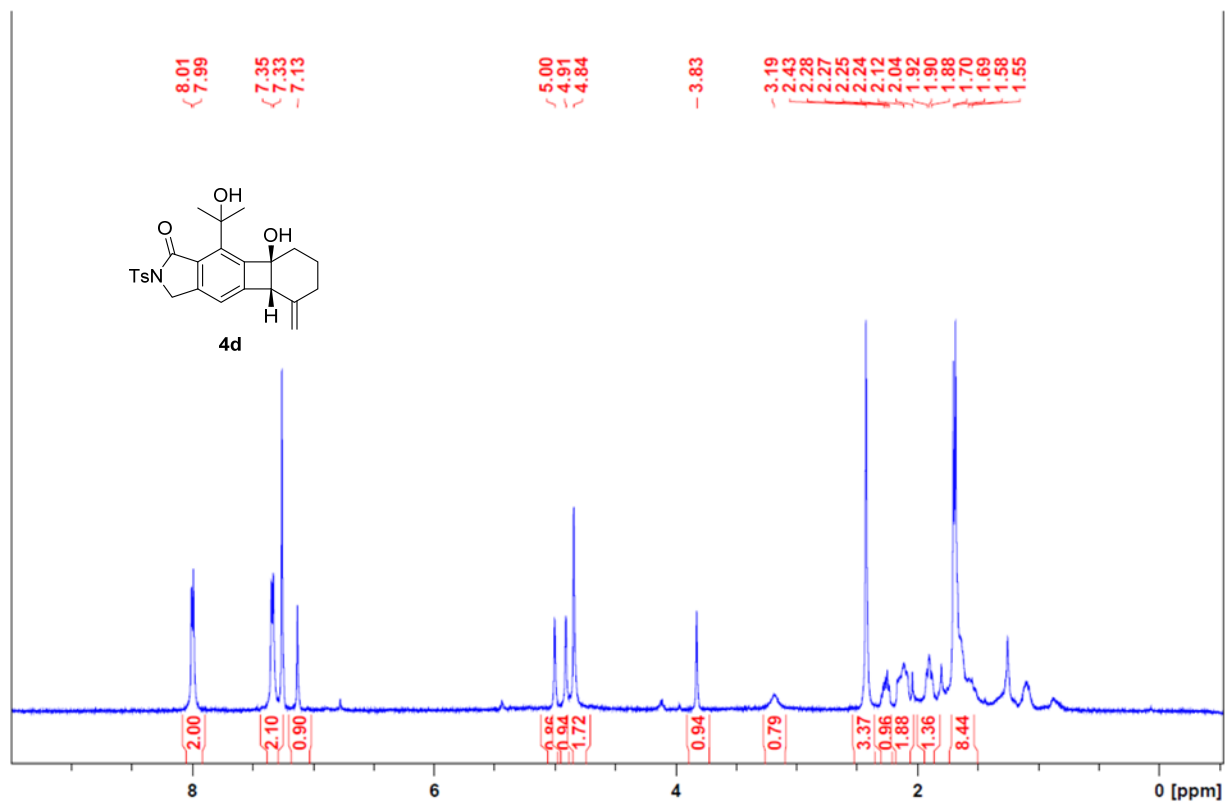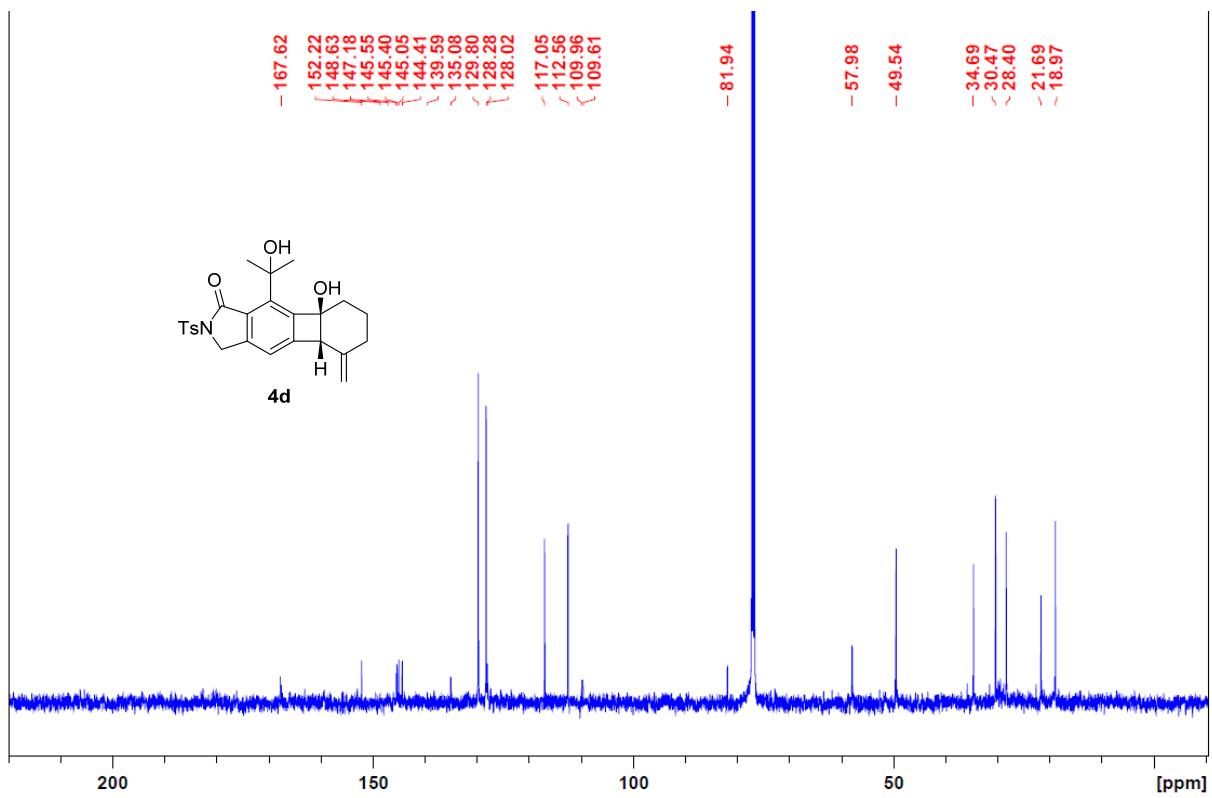



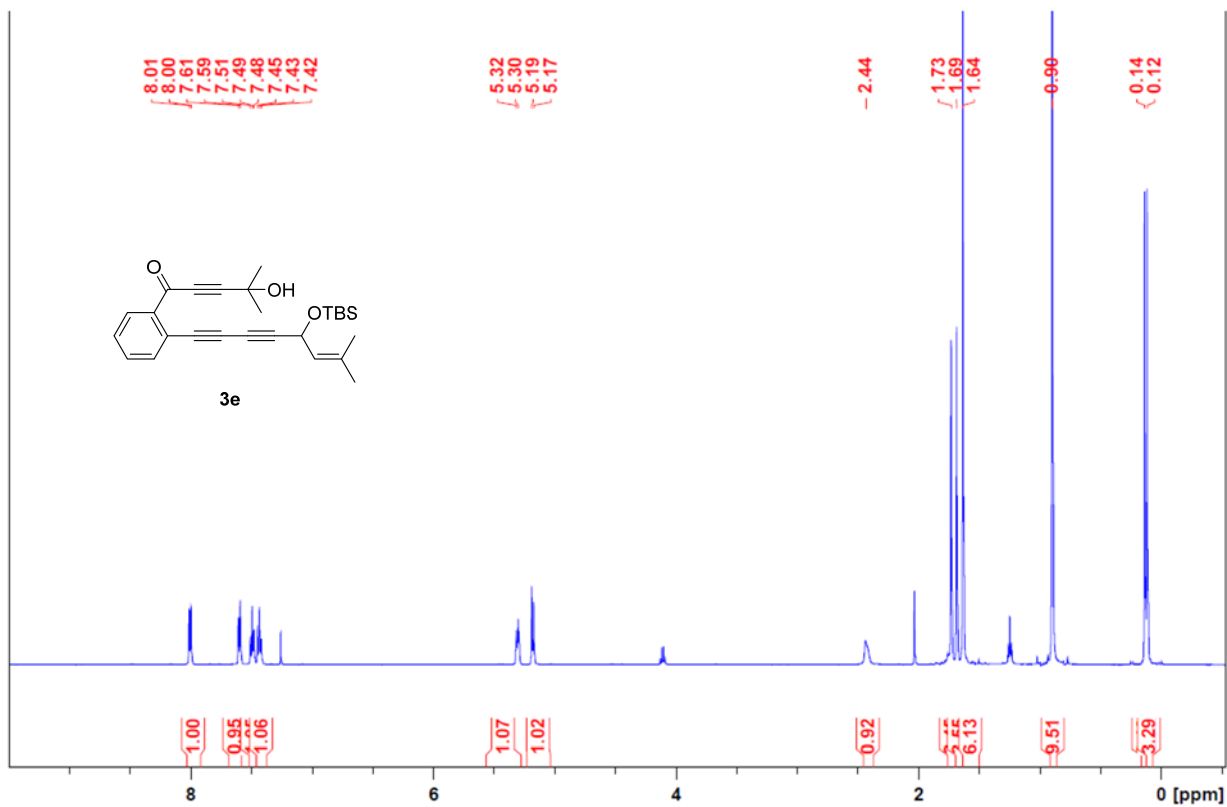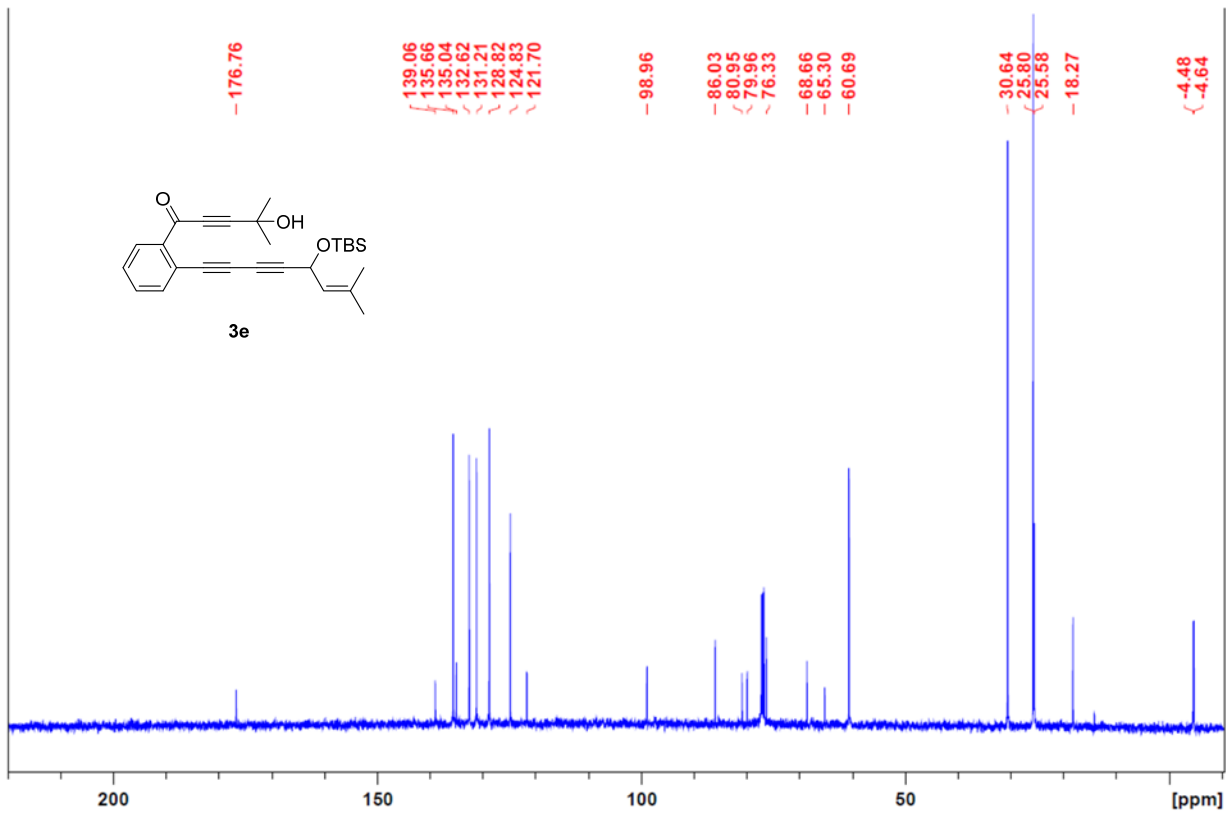

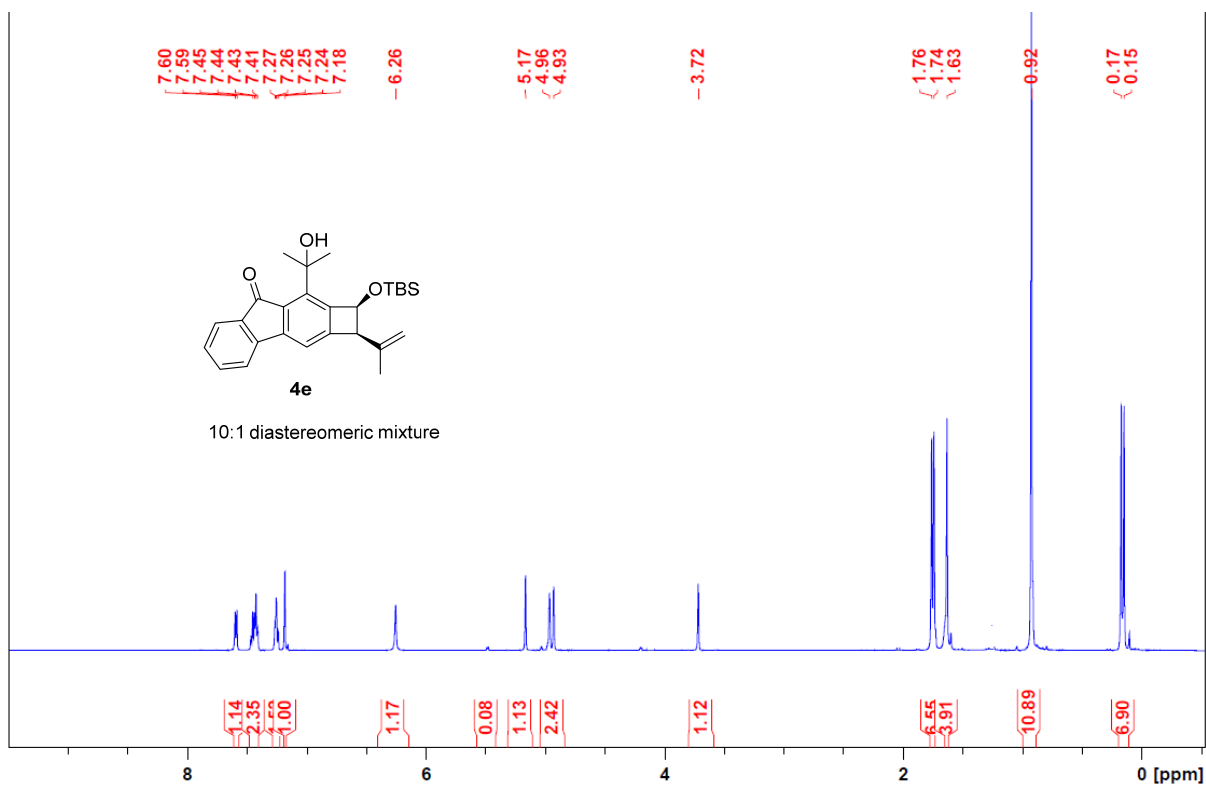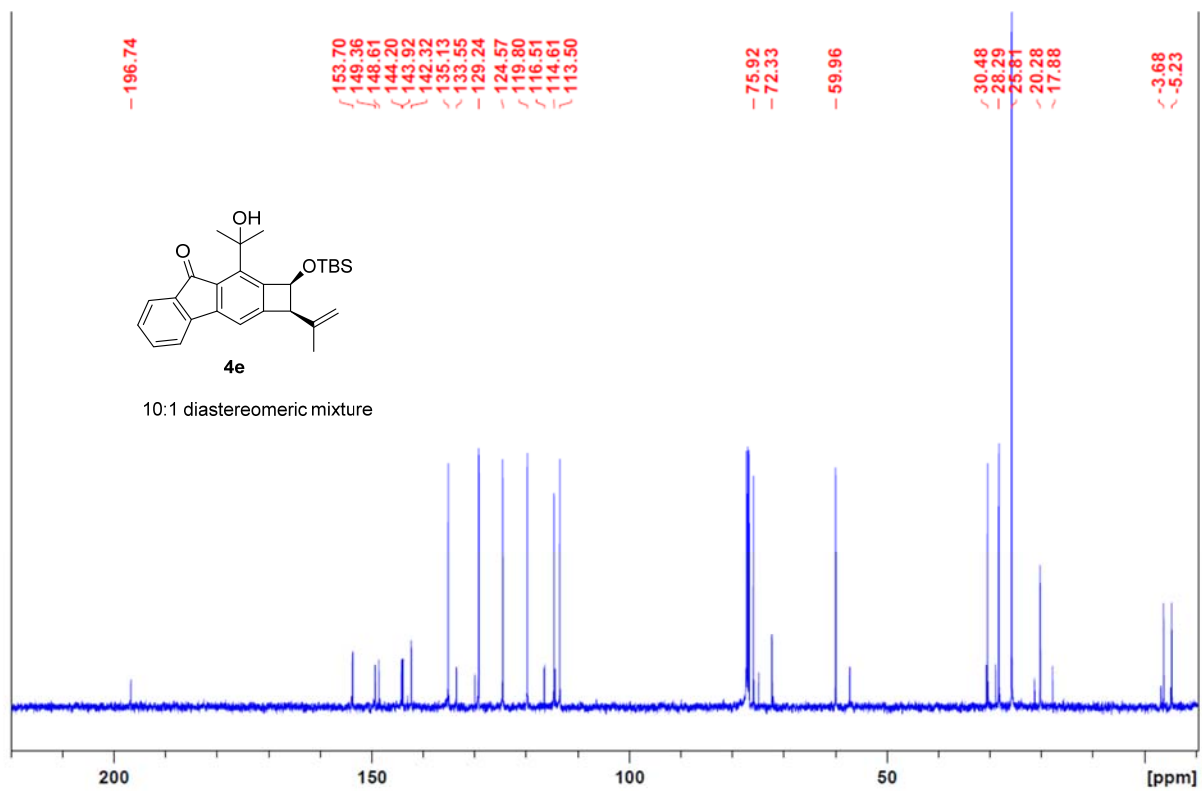



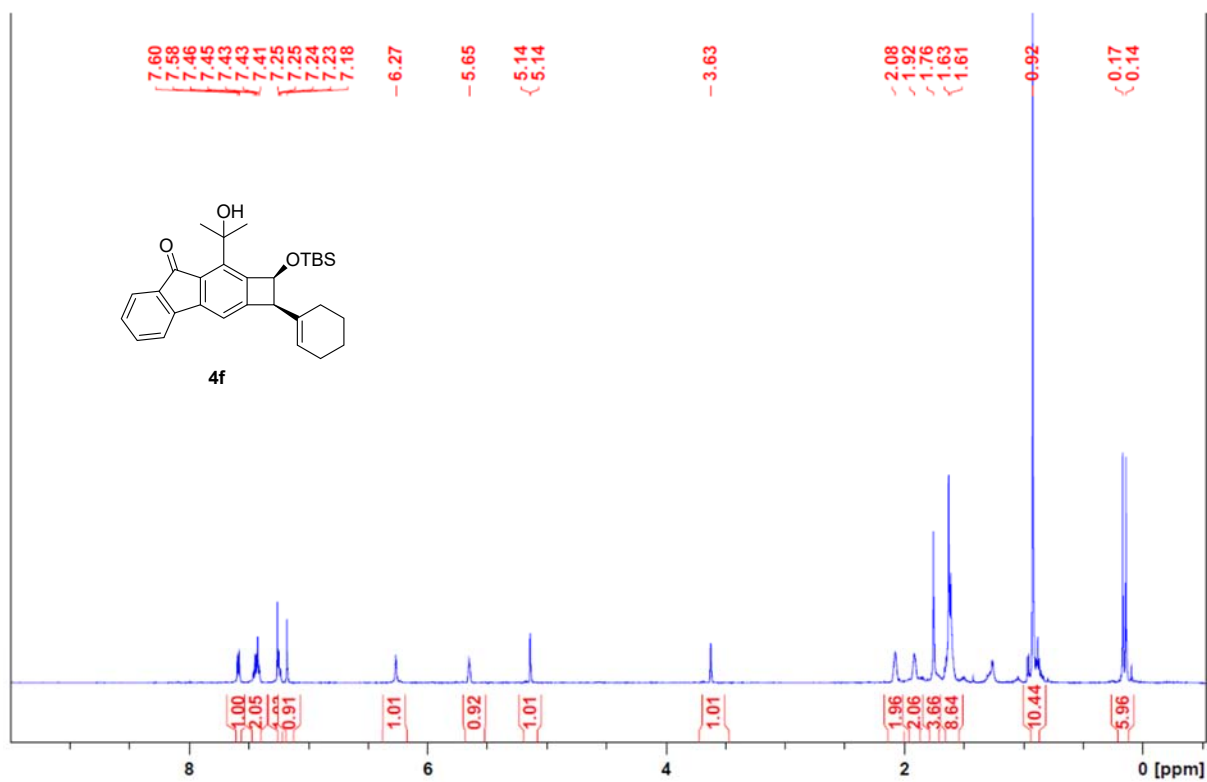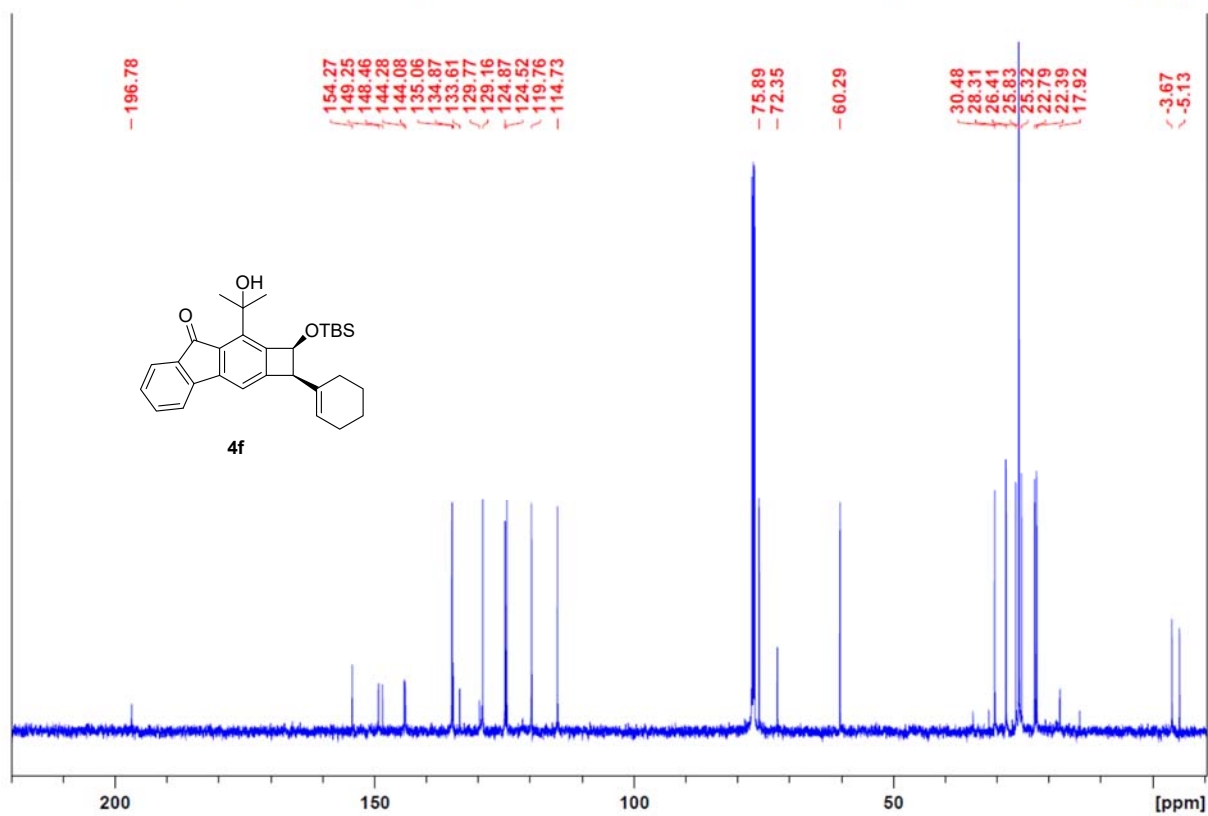

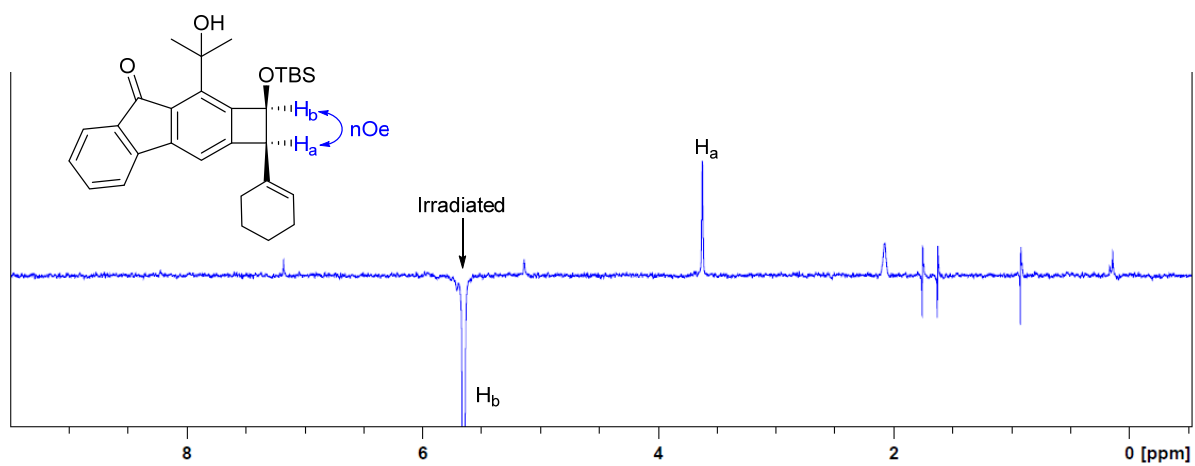



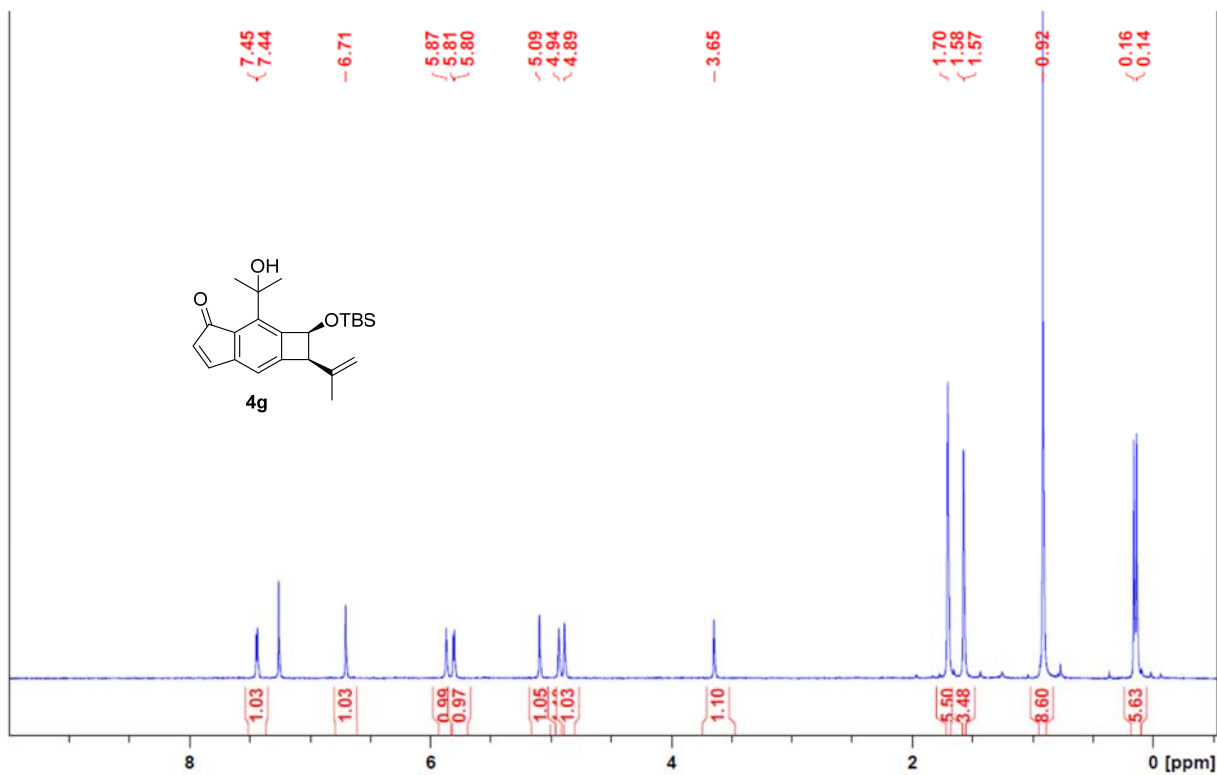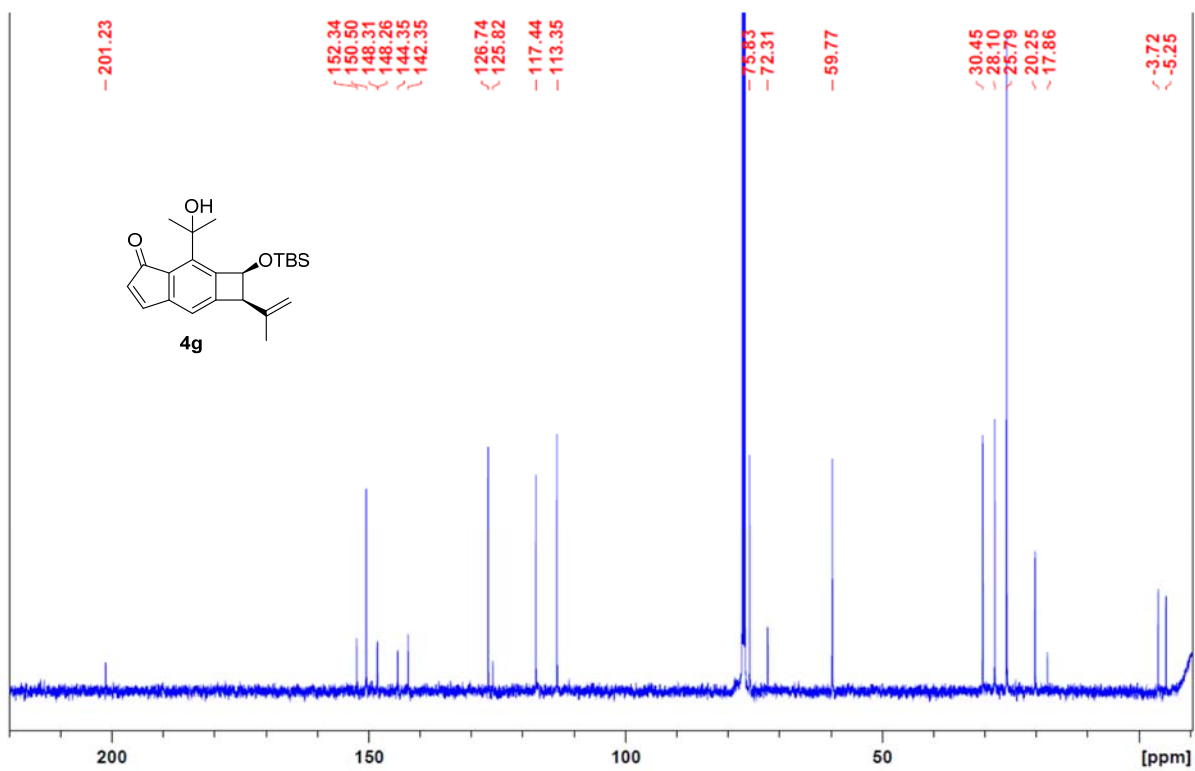





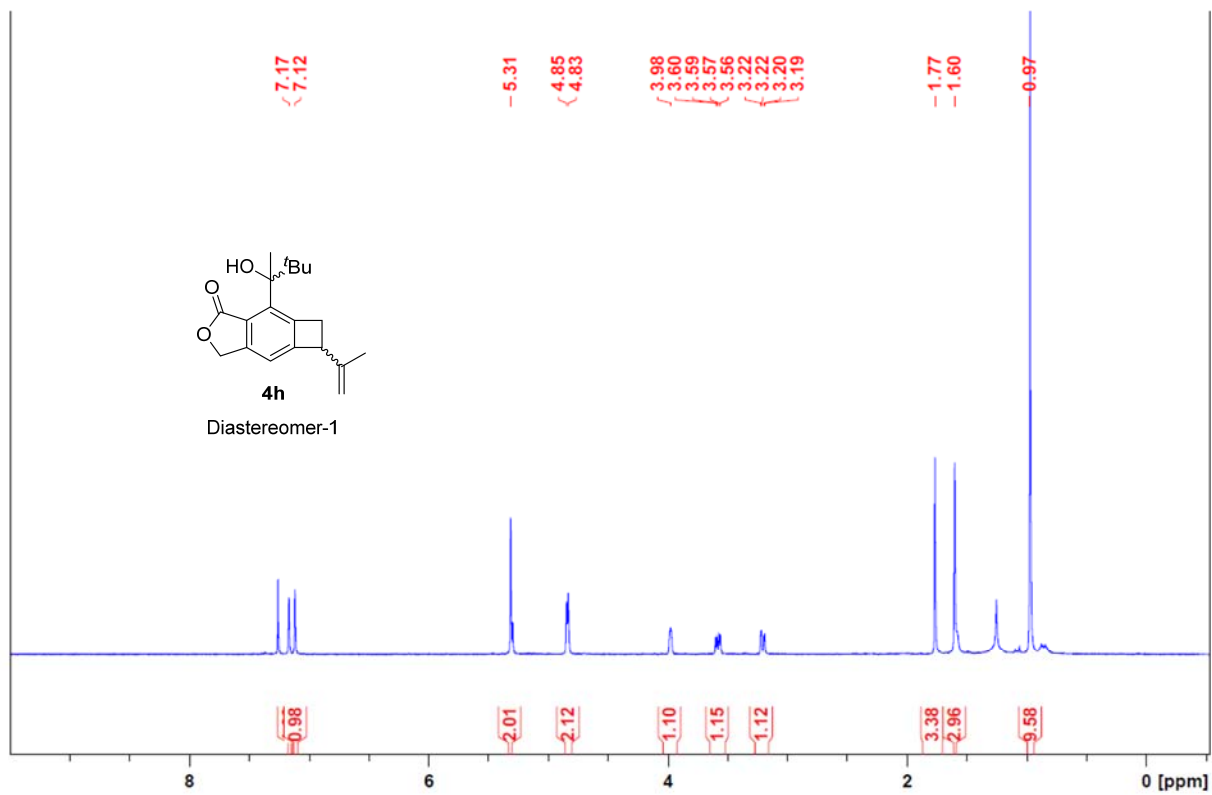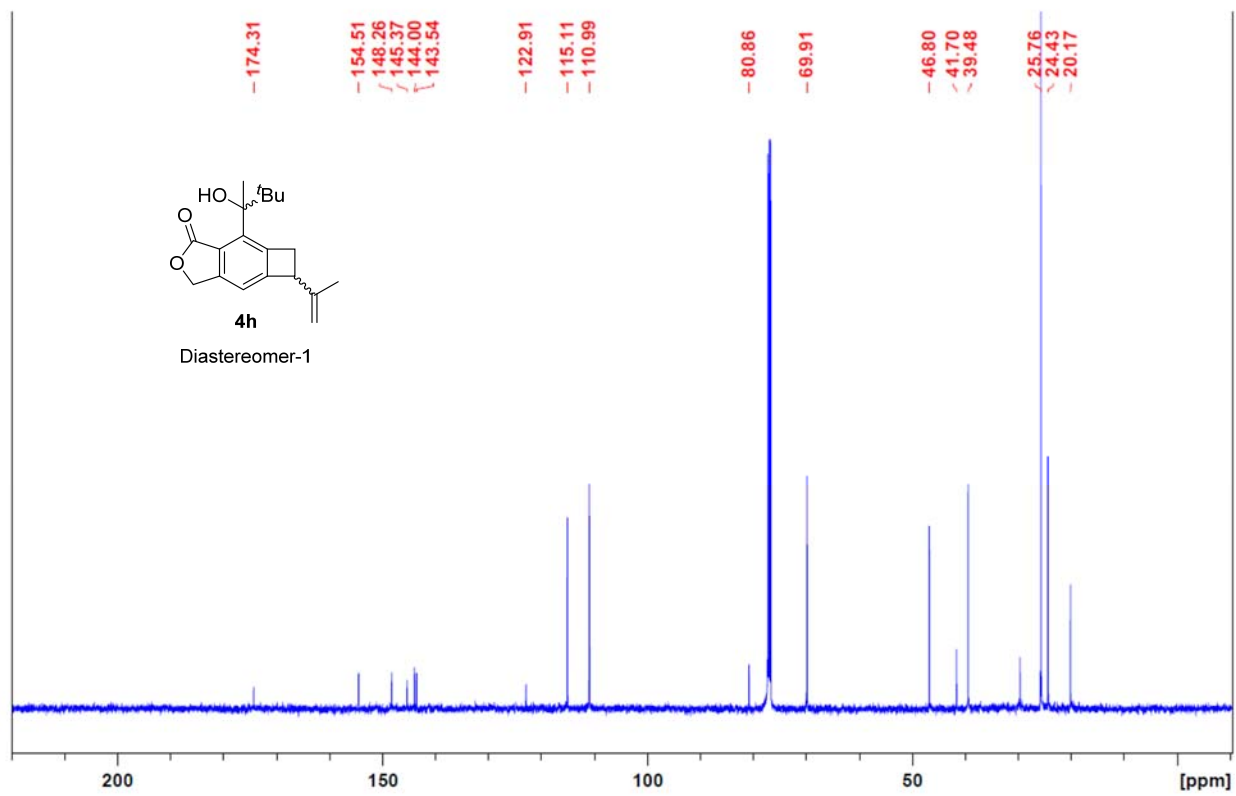

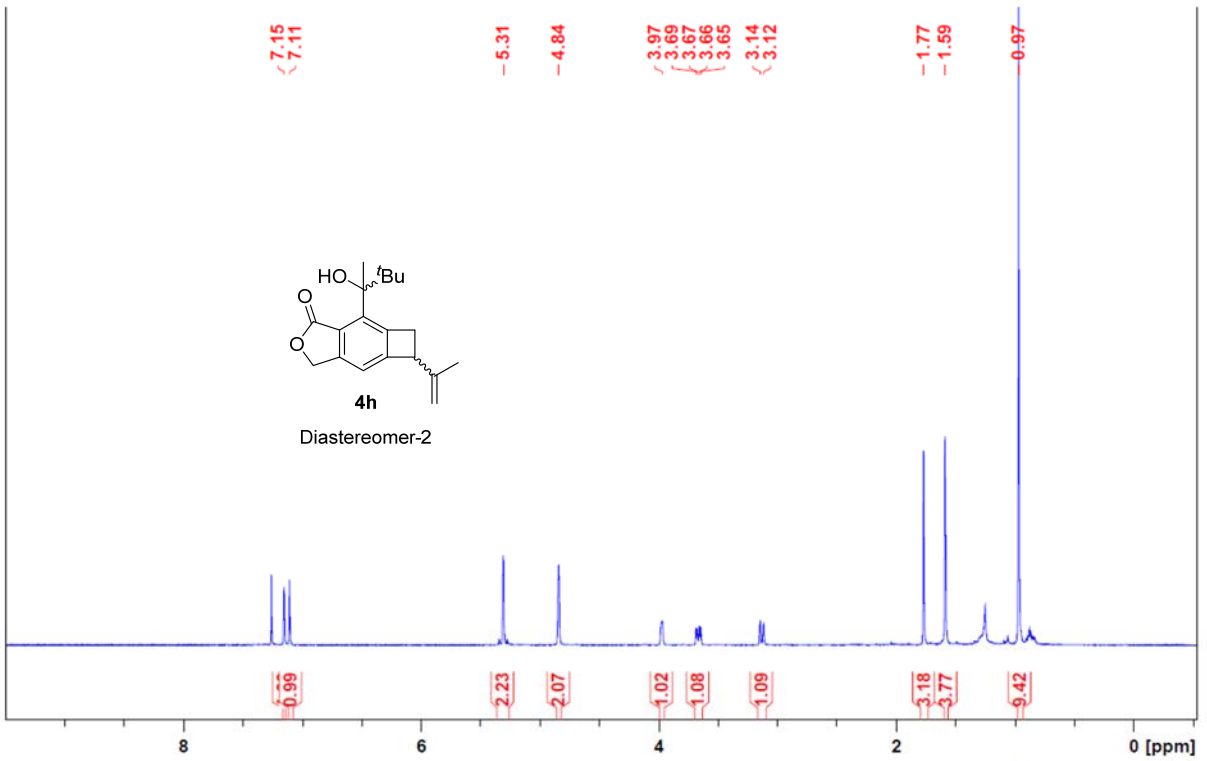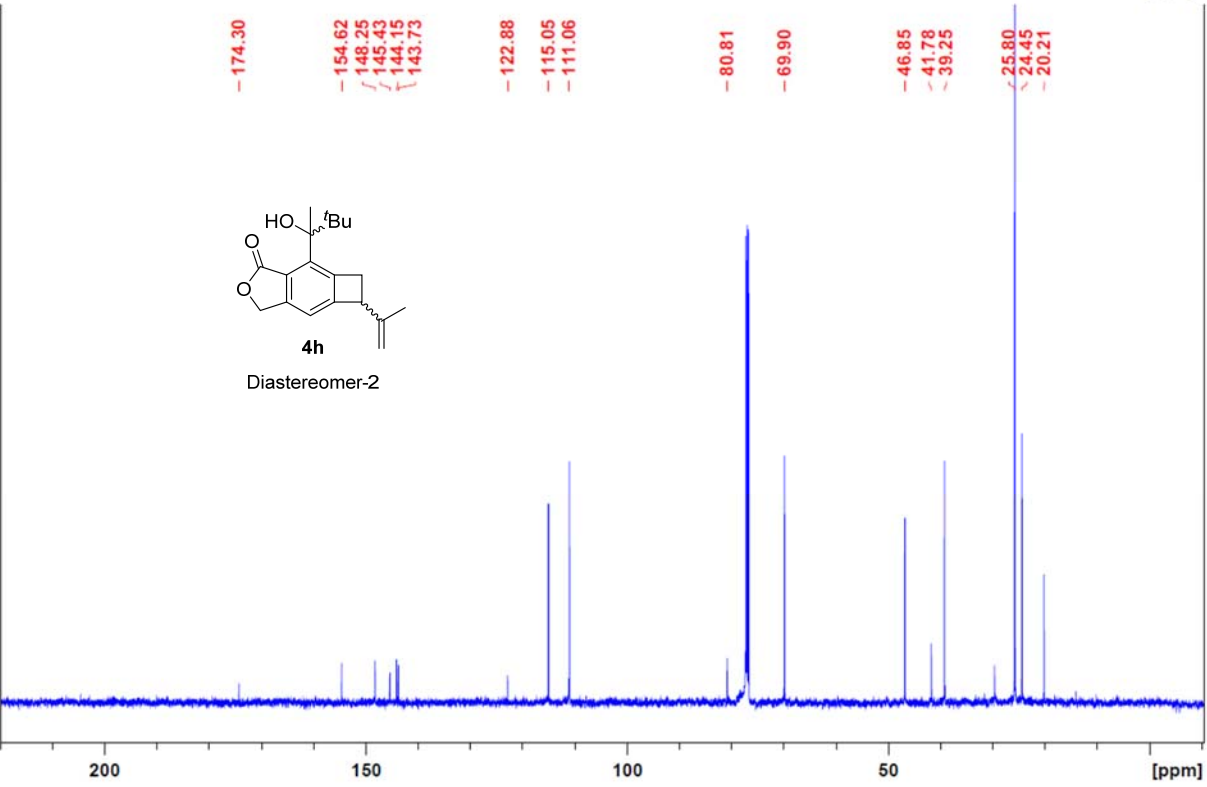

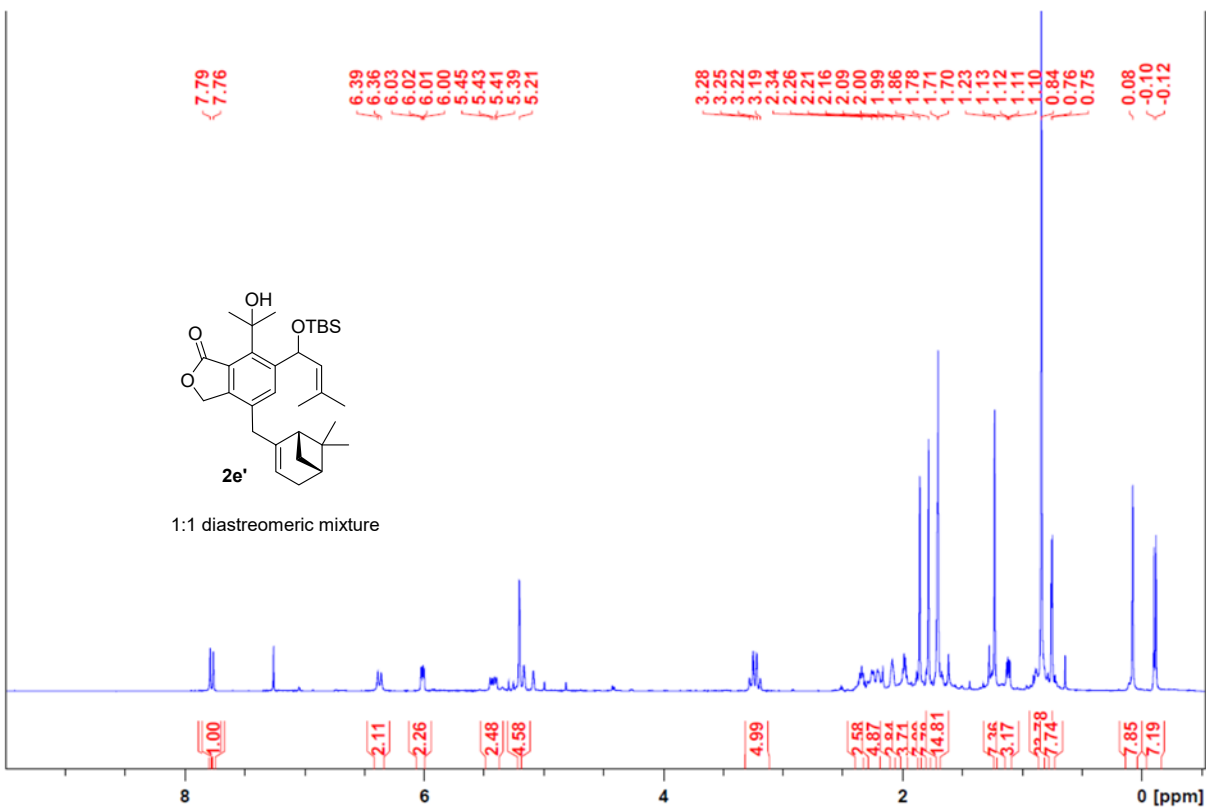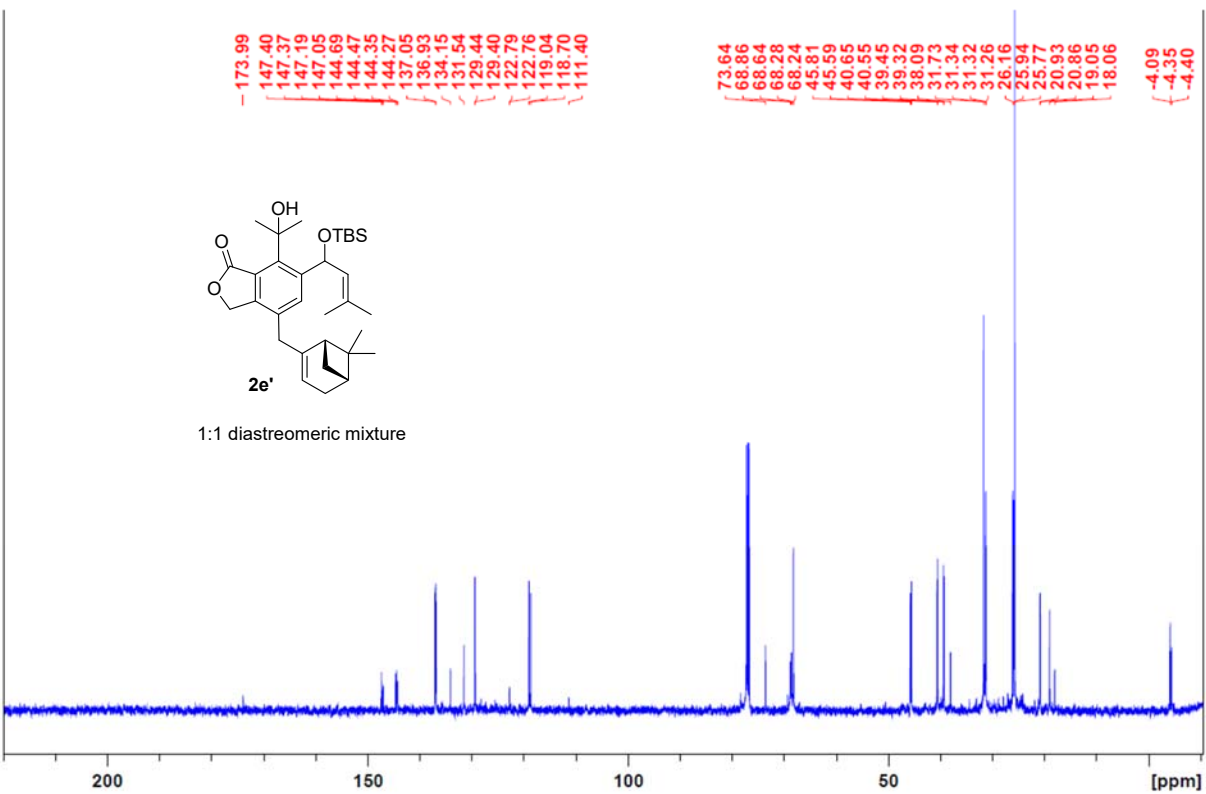

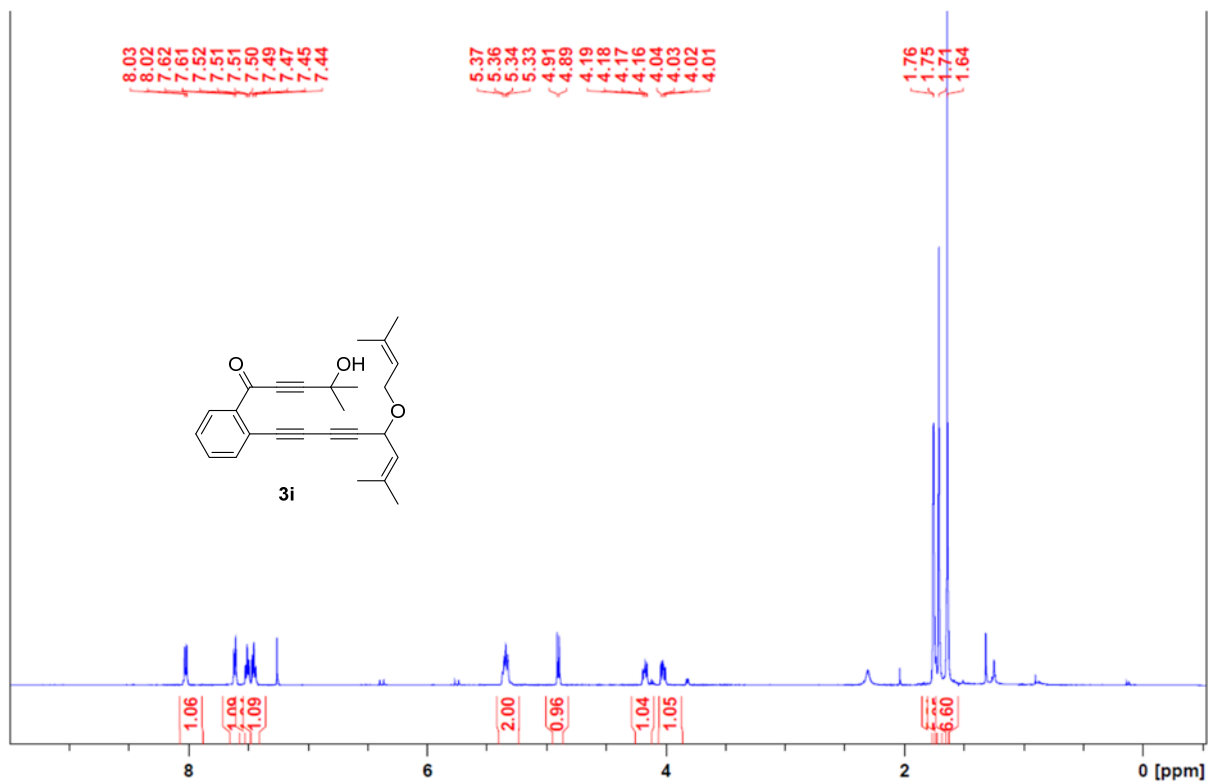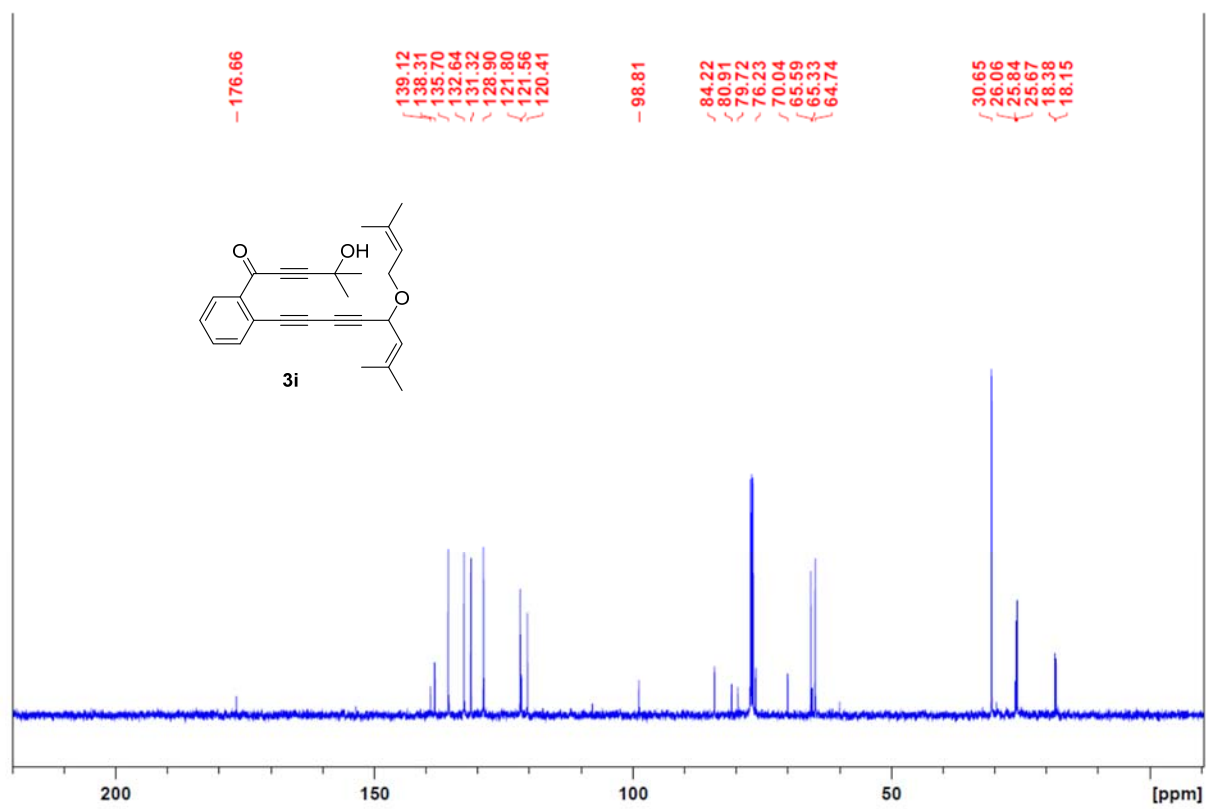

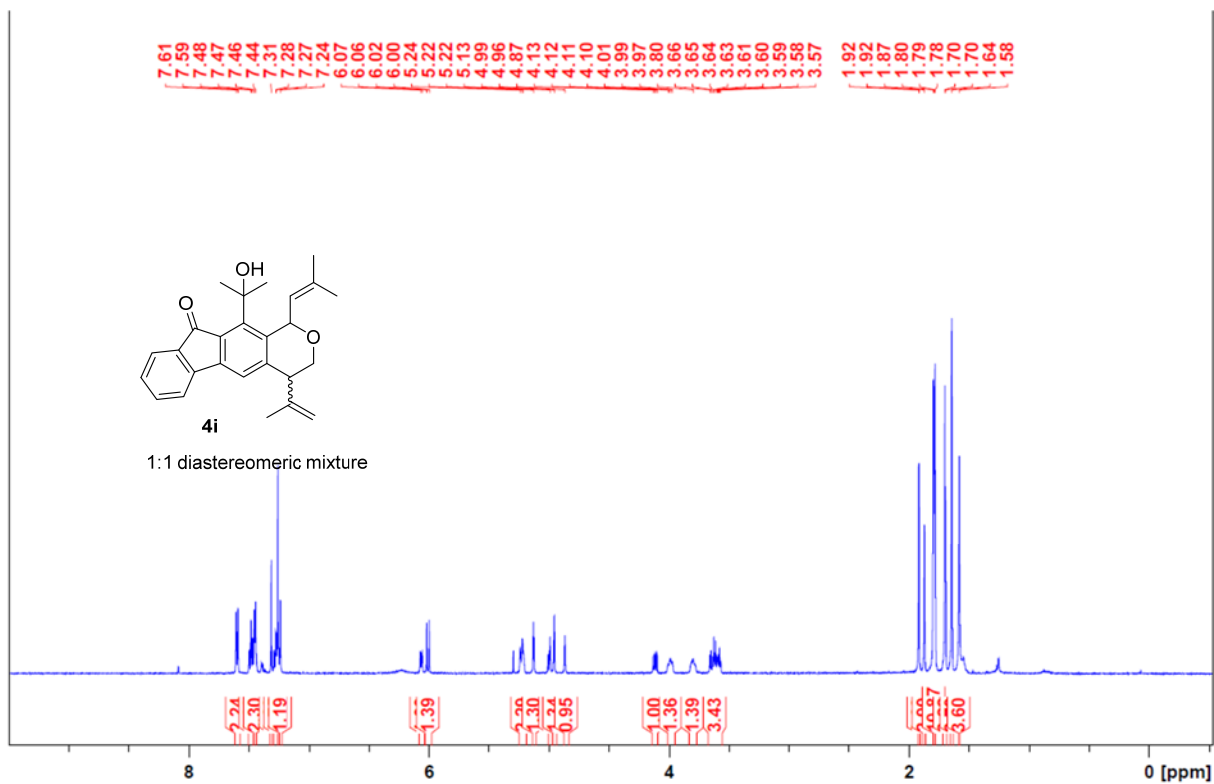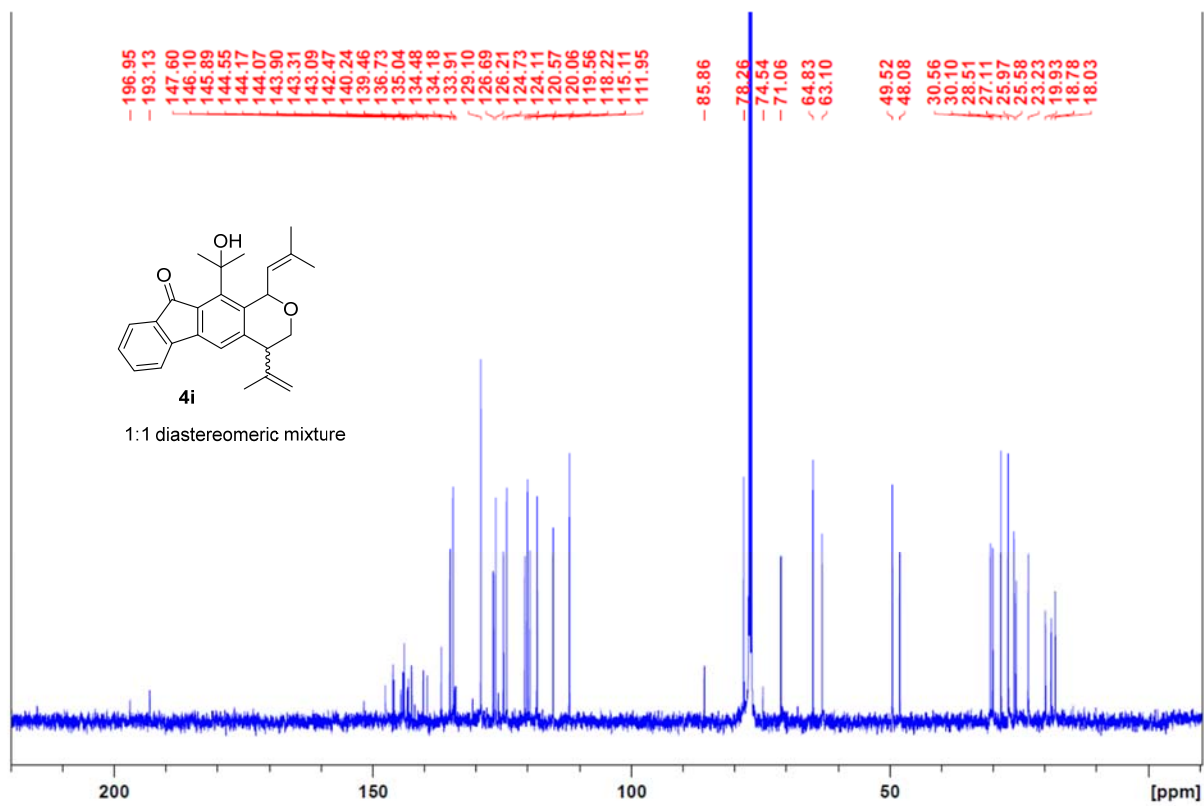

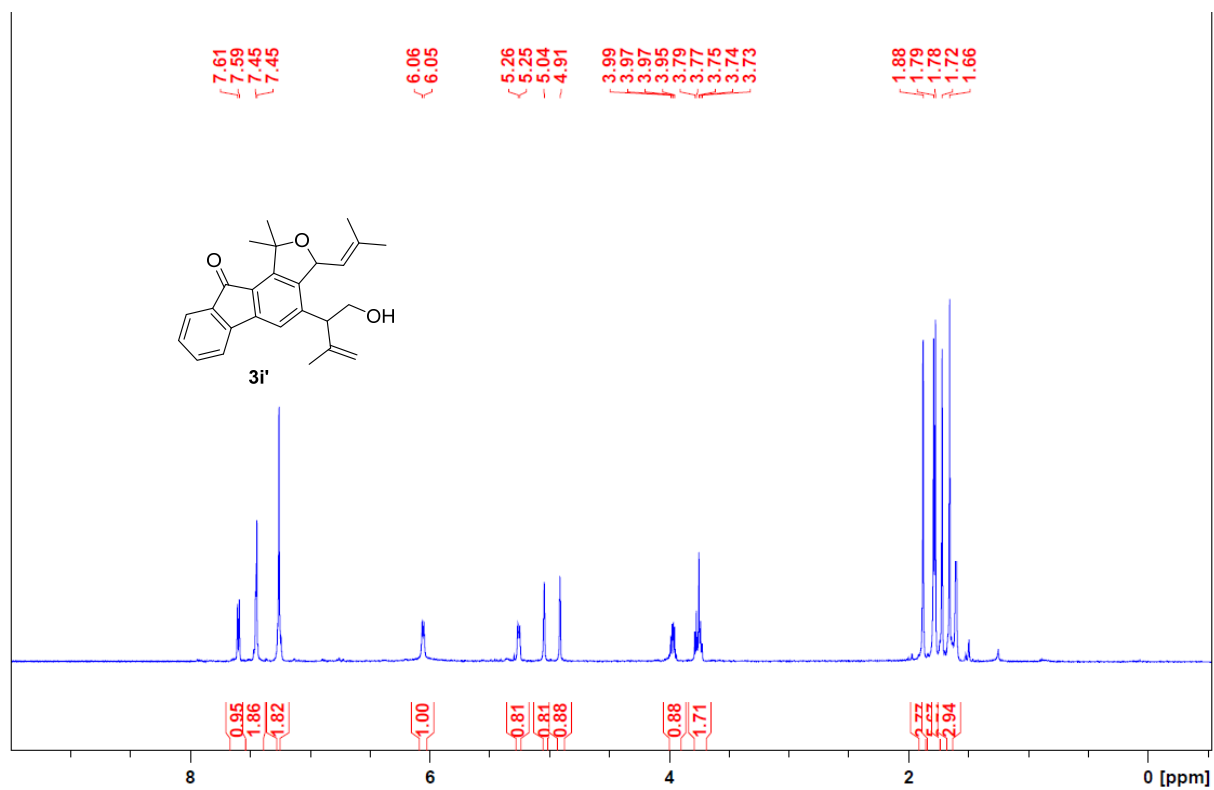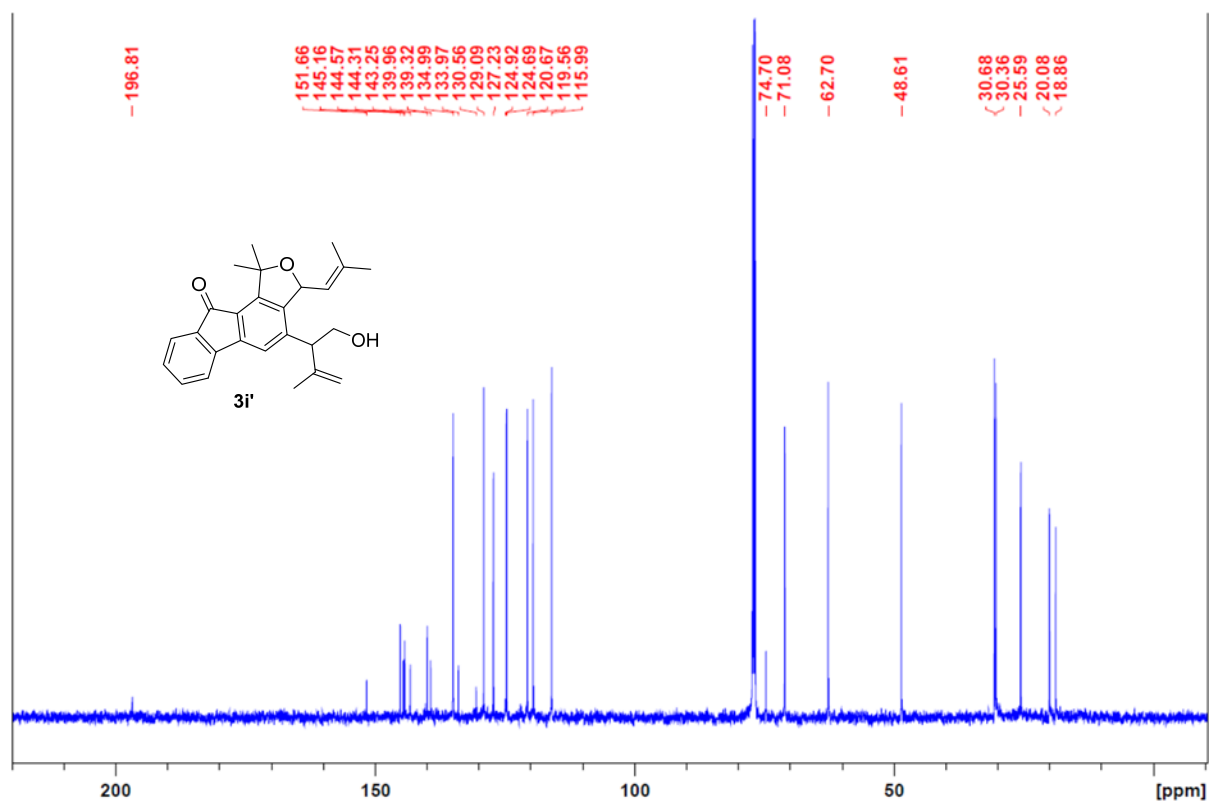

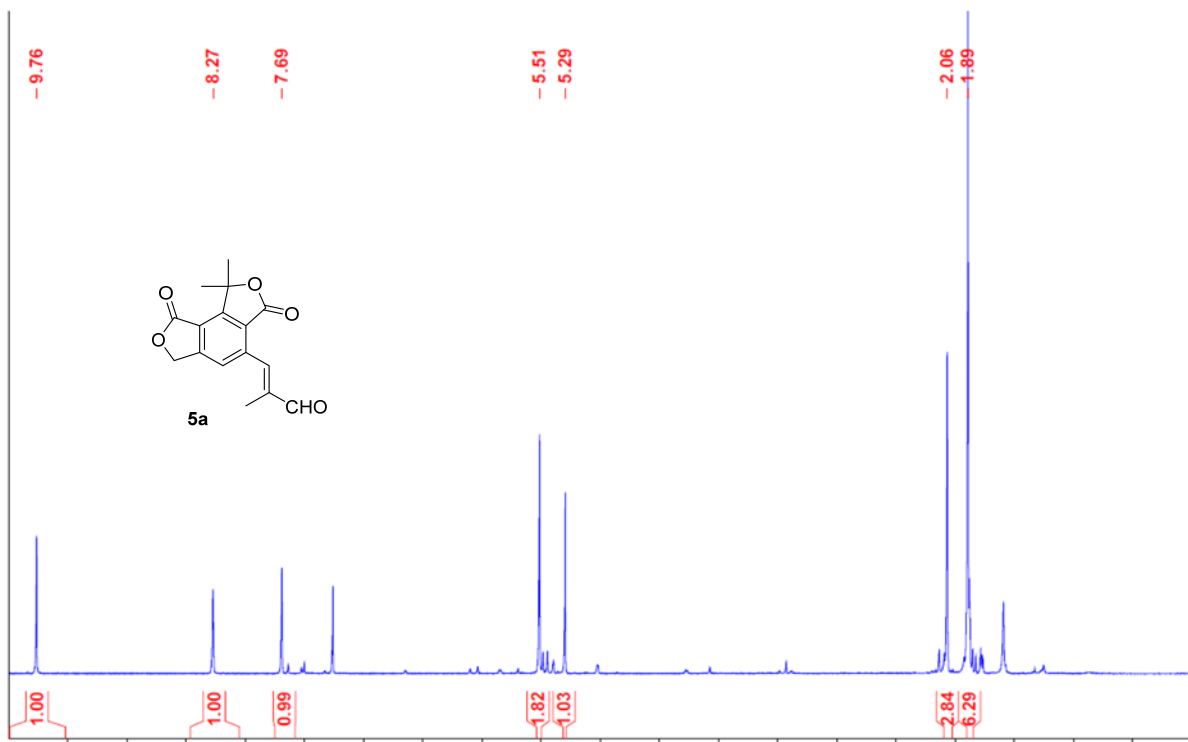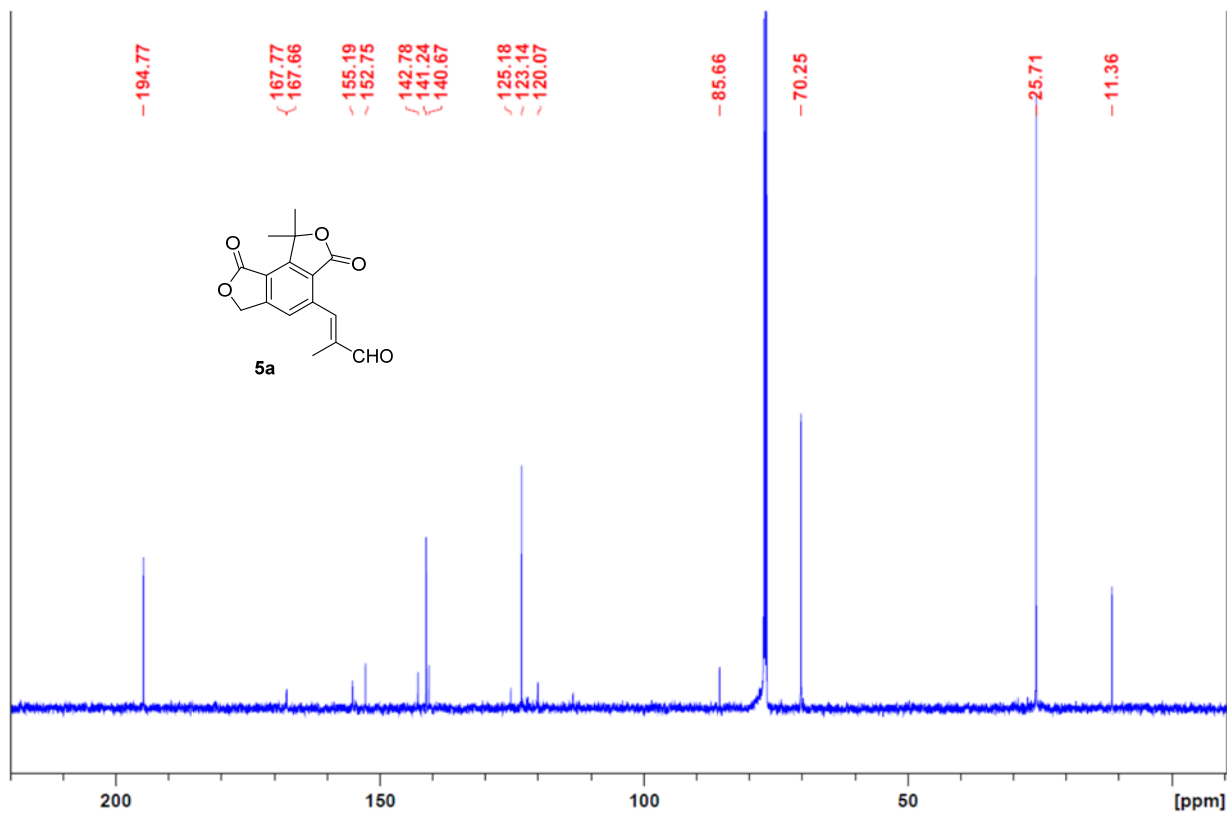

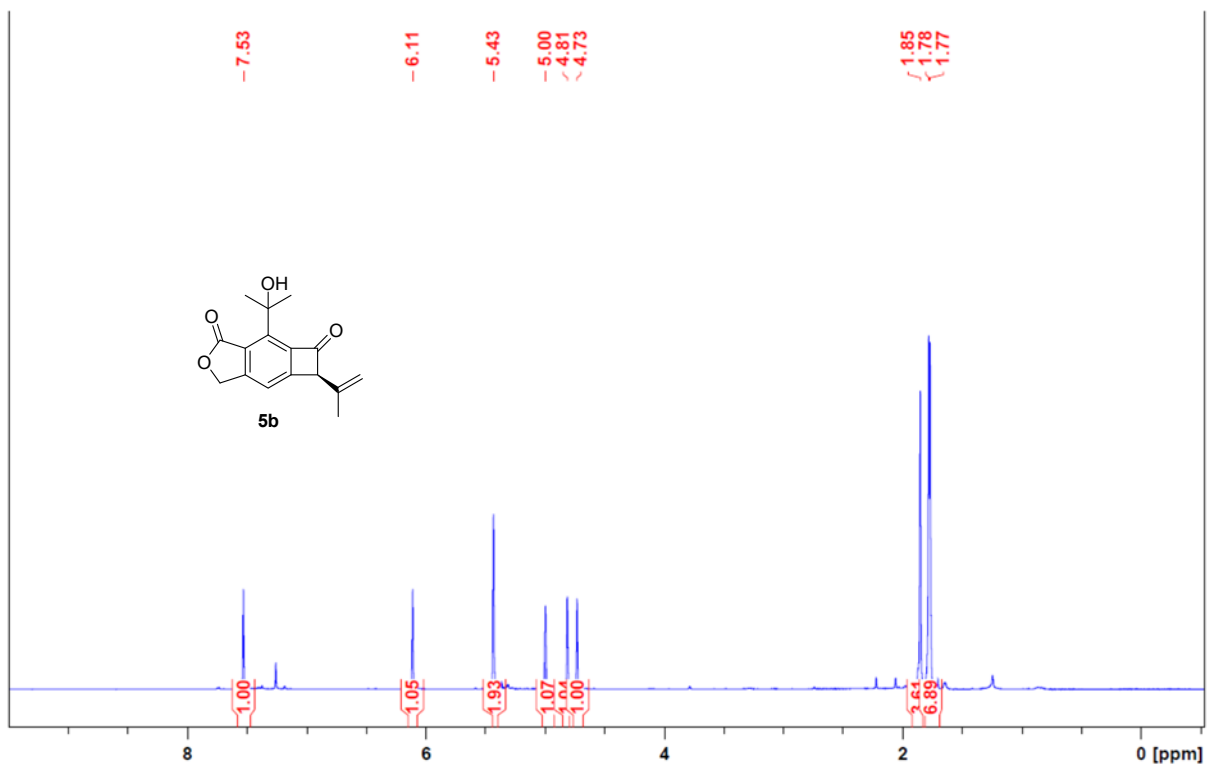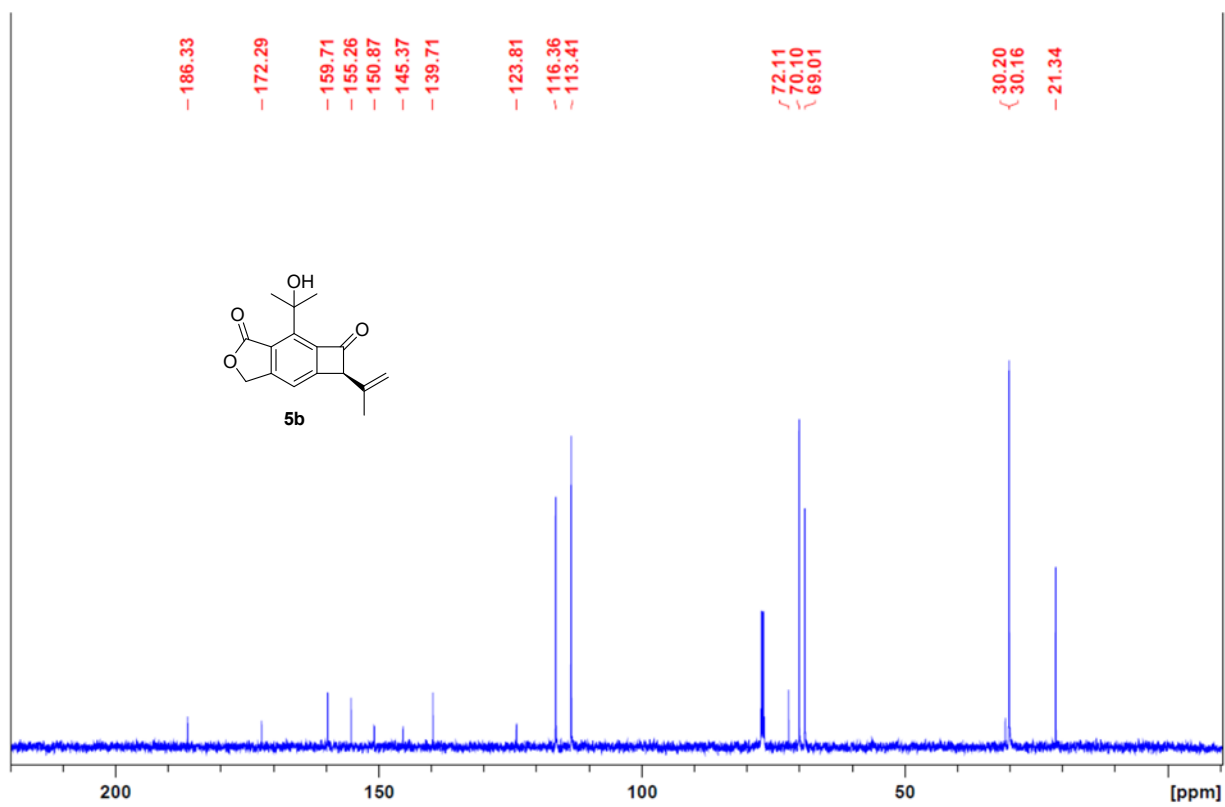



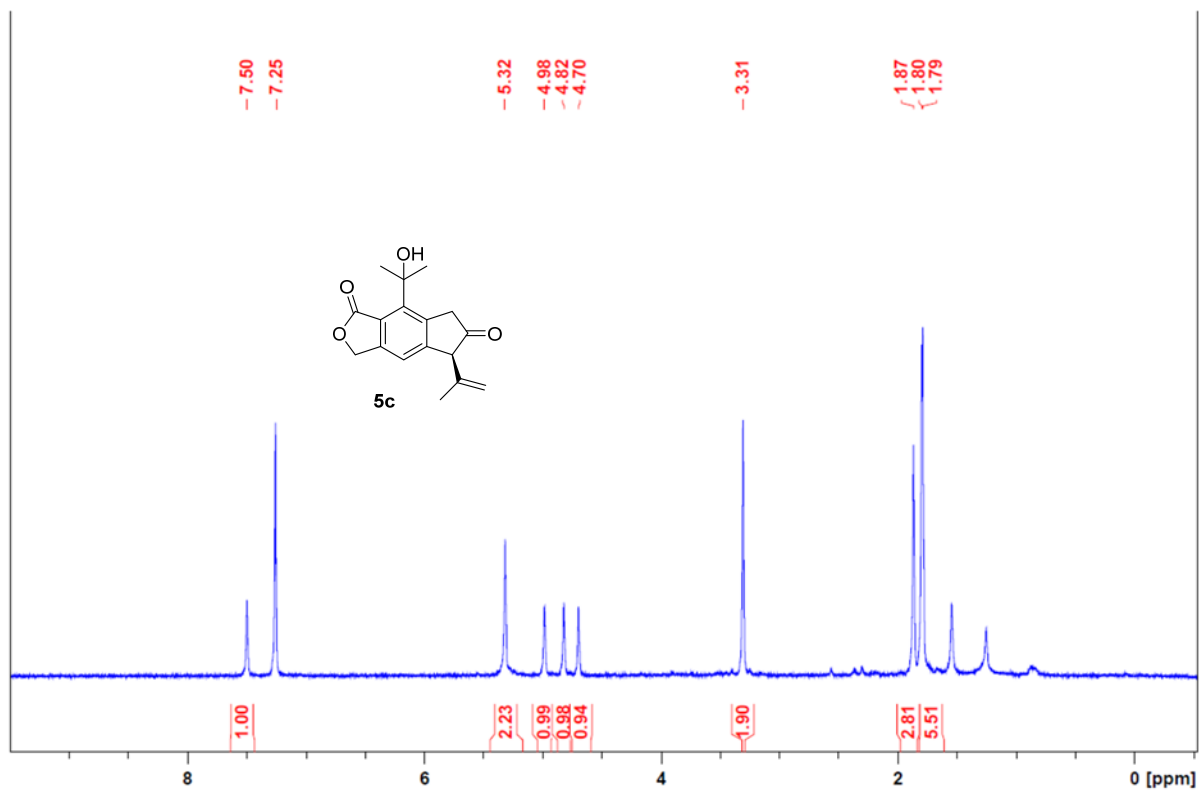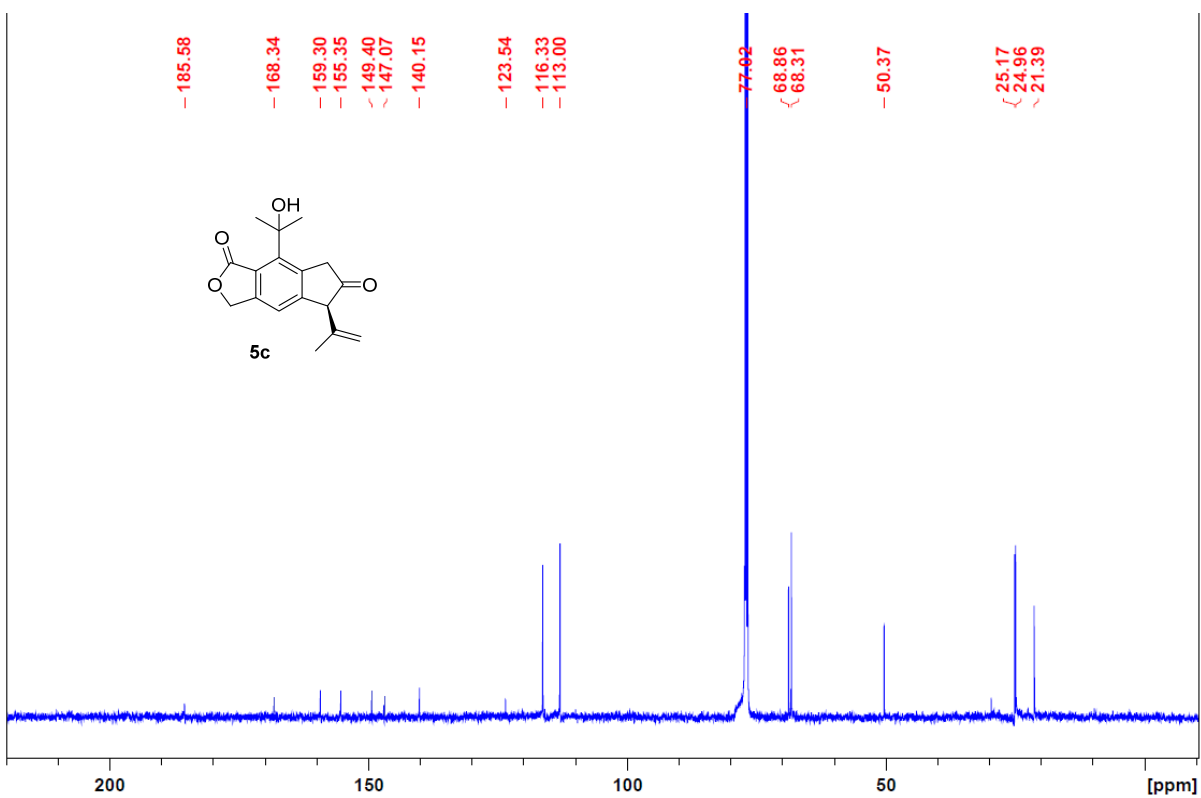

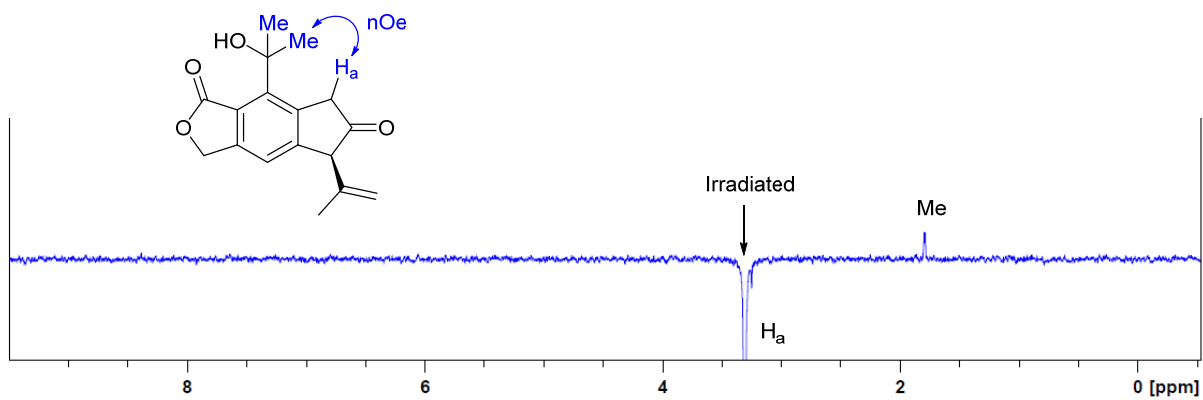

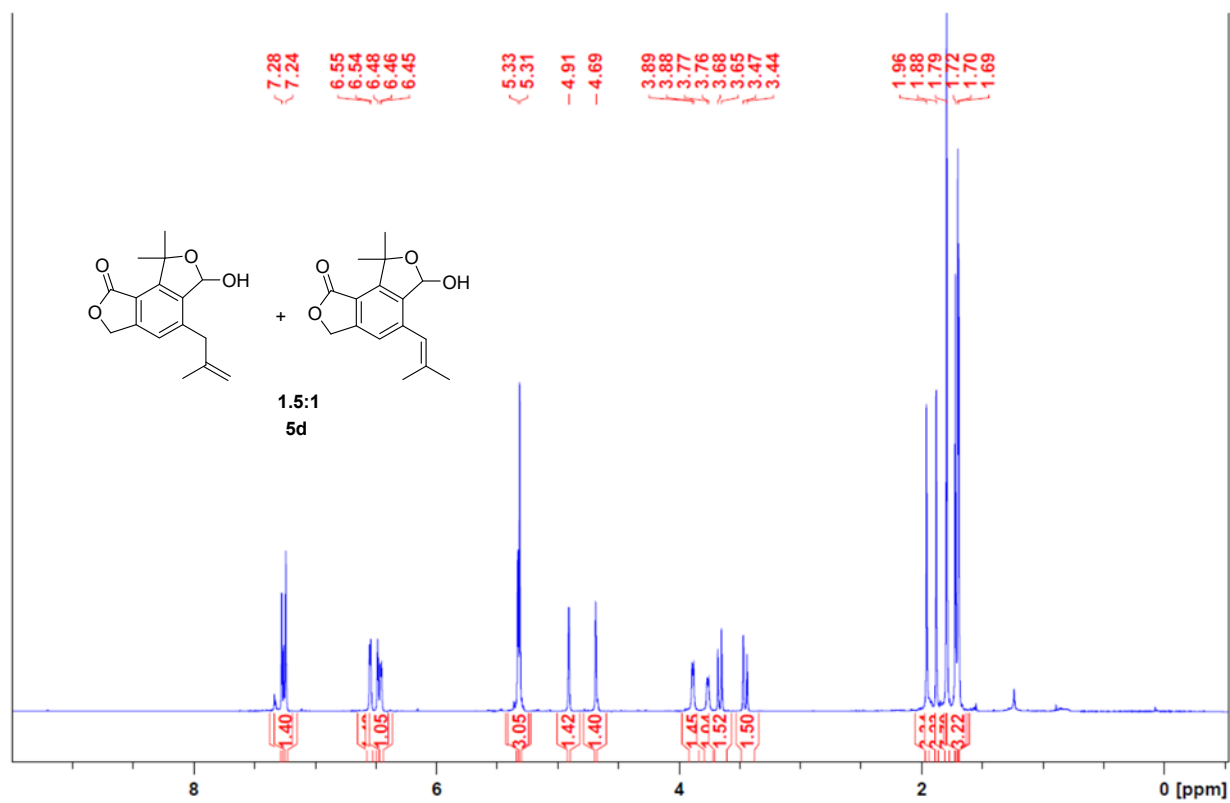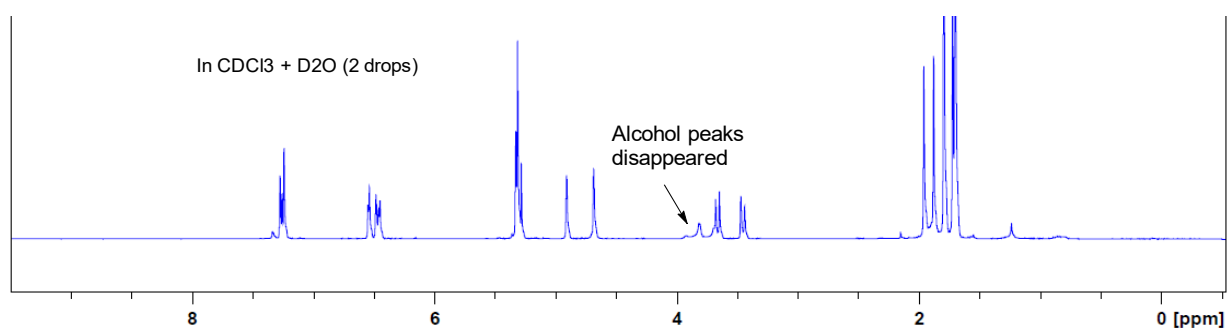

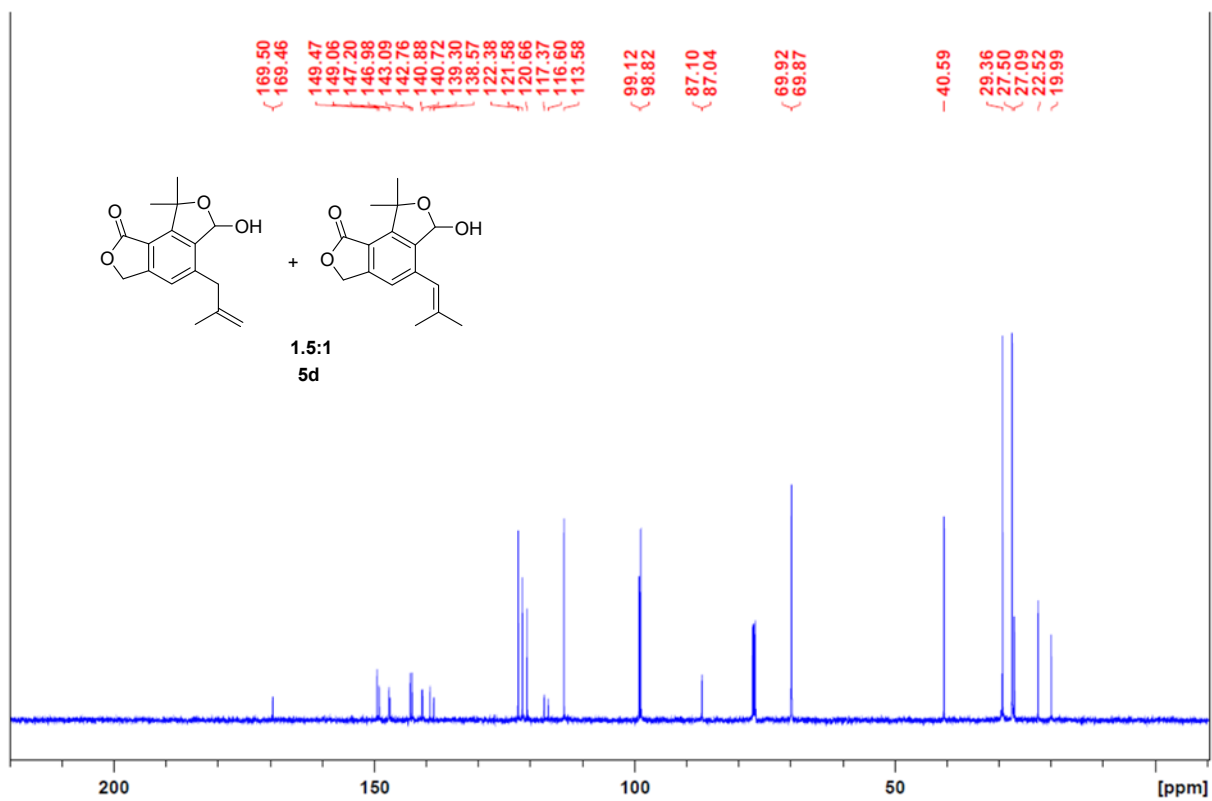

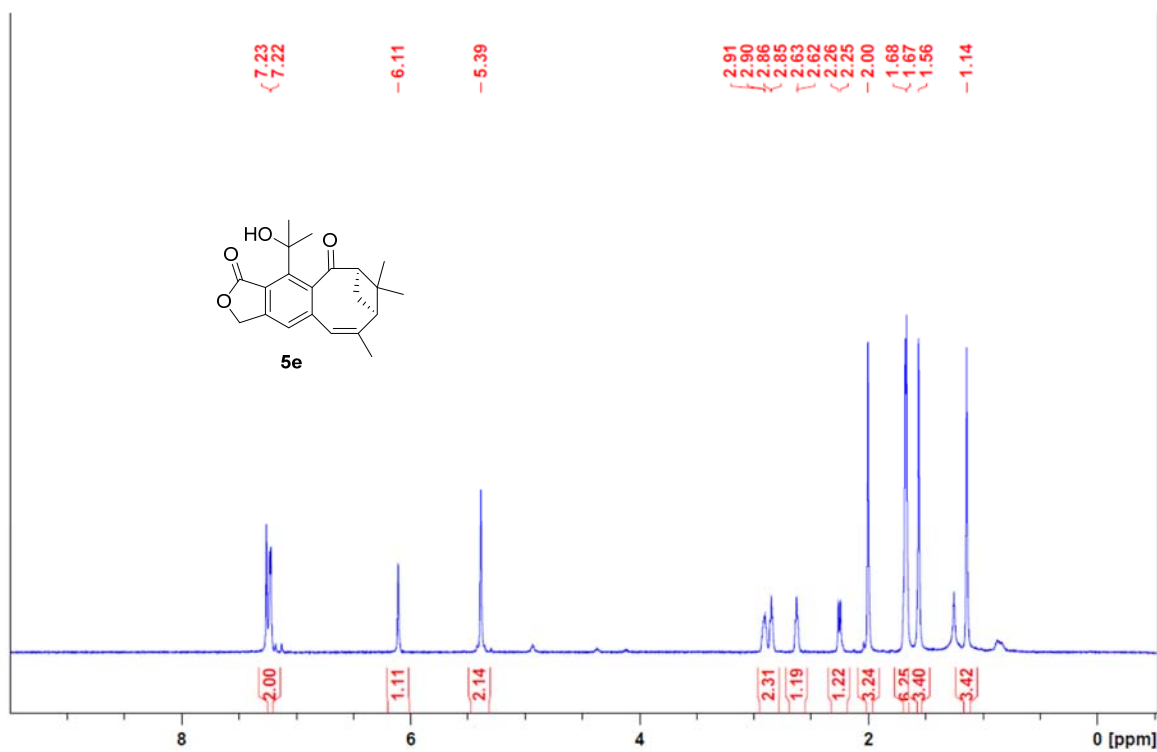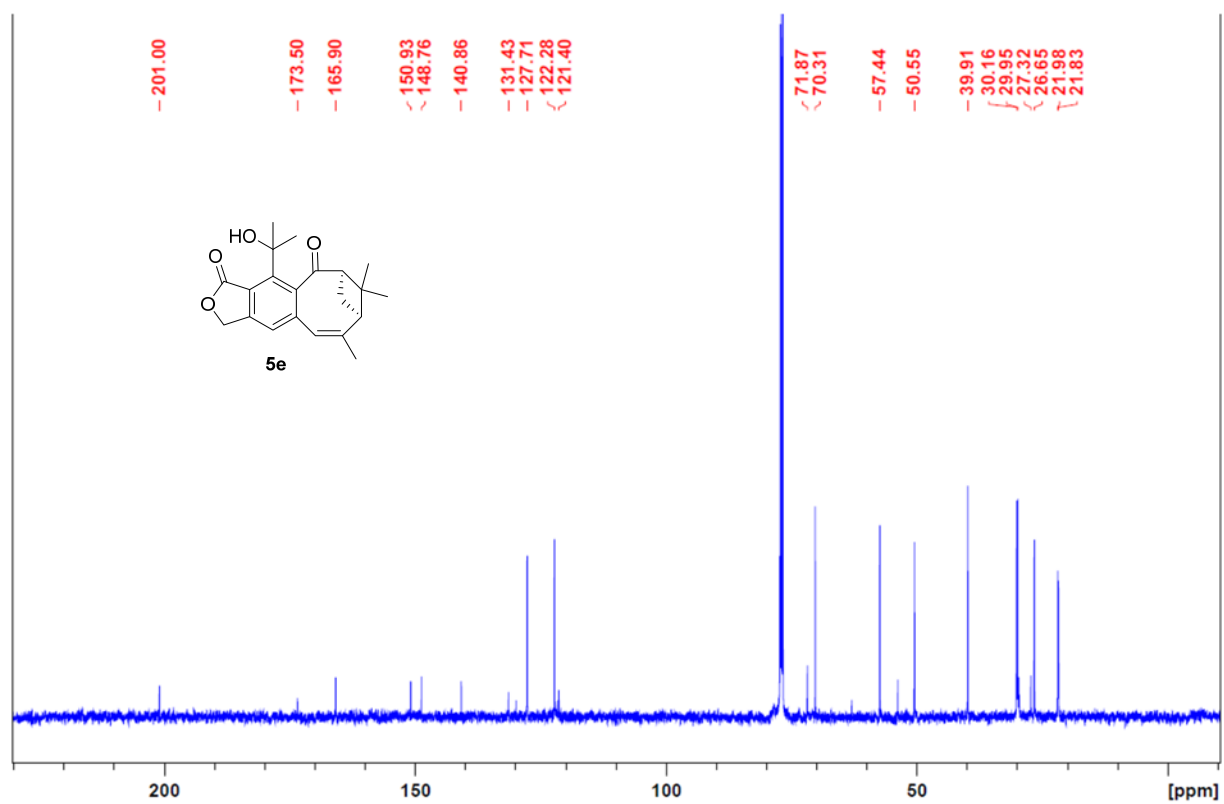

## X-ray Crystallographic data for compound 2o

CCDC **1843923** contain the supplementary crystallographic data for compound **2o**. These data can be obtained free of charge from The Cambridge Crystallographic Data Centre via [www.ccdc.cam.ac.uk/data\\_request/cif](http://www.ccdc.cam.ac.uk/data_request/cif).

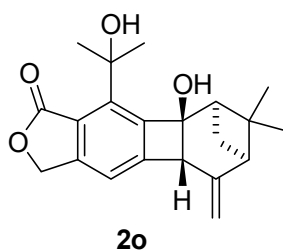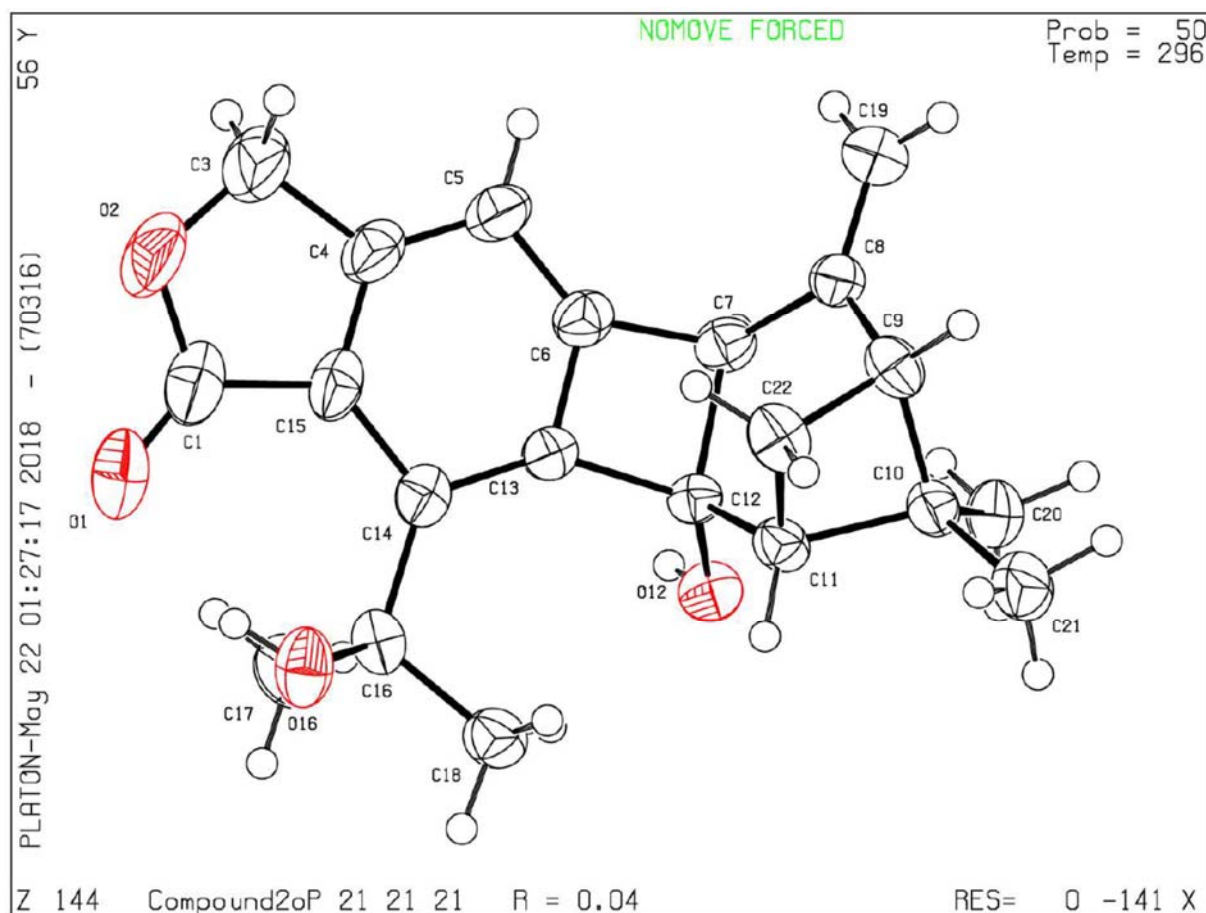

# Data for DFT calculations

## 1. Computational Details

All DFT calculations were carried out with the Gaussian 09 suite of computational programs.<sup>[1]</sup> The geometries of all stationary points were optimized using the B3LYP hybrid functional<sup>[2]</sup> at the basis set level of 6-31G(d). Frequencies were analytically computed at the same level of theory to obtain the free energies and to confirm whether the structures are minima (no imaginary frequency) or transition states (only one imaginary frequency). The solvent effect of toluene was evaluated by using the SMD polarizable continuum model by carrying out single point calculations at the M06/6-311++G(d,p) level.<sup>[3]</sup> All transition state structures were confirmed to connect the proposed reactants and products by intrinsic reaction coordinate (IRC) calculations. The energies given in the text are Gibbs free energies corrected with solvation effects. All these are relative to the energies of the corresponding substrate.

[1] Gaussian 09, Revision A.01, M. J. Frisch, G. W. Trucks, H. B. Schlegel, G. E. Scuseria, M. A. Robb, J. R. Cheeseman, G. Scalmani, V. Barone, B. Mennucci, G. A. Petersson, H. Nakatsuji, M. Caricato, X. Li, H. P. Hratchian, A. F. Izmaylov, J. Bloino, G. Zheng, J. L. Sonnenberg, M. Hada, M. Ehara, K. Toyota, R. Fukuda, J. Hasegawa, M. Ishida, T. Nakajima, Y. Honda, O. Kitao, H. Nakai, T. Vreven, J. A. Montgomery, Jr., J. E. Peralta, F. Ogliaro, M. Bearpark, J. J. Heyd, E. Brothers, K. N. Kudin, V. N. Staroverov, R. Kobayashi, J. Normand, K. Raghavachari, A. Rendell, J. C. Burant, S. S. Iyengar, J. Tomasi, M. Cossi, N. Rega, J. M. Millam, M. Klene, J. E. Knox, J. B. Cross, V. Bakken, C. Adamo, J. Jaramillo, R. Gomperts, R. E. Stratmann, O. Yazyev, A. J. Austin, R. Cammi, C. Pomelli, J. W. Ochterski, R. L. Martin, K. Morokuma, V. G. Zakrzewski, G. A. Voth, P. Salvador, J. J. Dannenberg, S. Dapprich, A. D. Daniels, Ö. Farkas, J. B. Foresman, J. V. Ortiz, J. Cioslowski, D. J. Fox, Gaussian, Inc., Wallingford CT, **2009**.

[2] (a) Becke, A. D. *J. Chem. Phys.* **1993**, *98*, 5648. (b) Becke, A. D. *J. Chem. Phys.* **1993**, *98*, 1372. (c) Lee, C.; Yang, W.; Parr, R. G. *Phys. Rev. B* **1988**, *37*, 785.

[3] (a) Zhao, Y.; Truhlar, D. G. *Theor. Chem. Acc.* **2008**, *120*, 215. (b) Zhao, Y.; Truhlar, D. G. *Acc. Chem. Res.* **2008**, *41*, 157.

## 2. Reaction profile for 1e

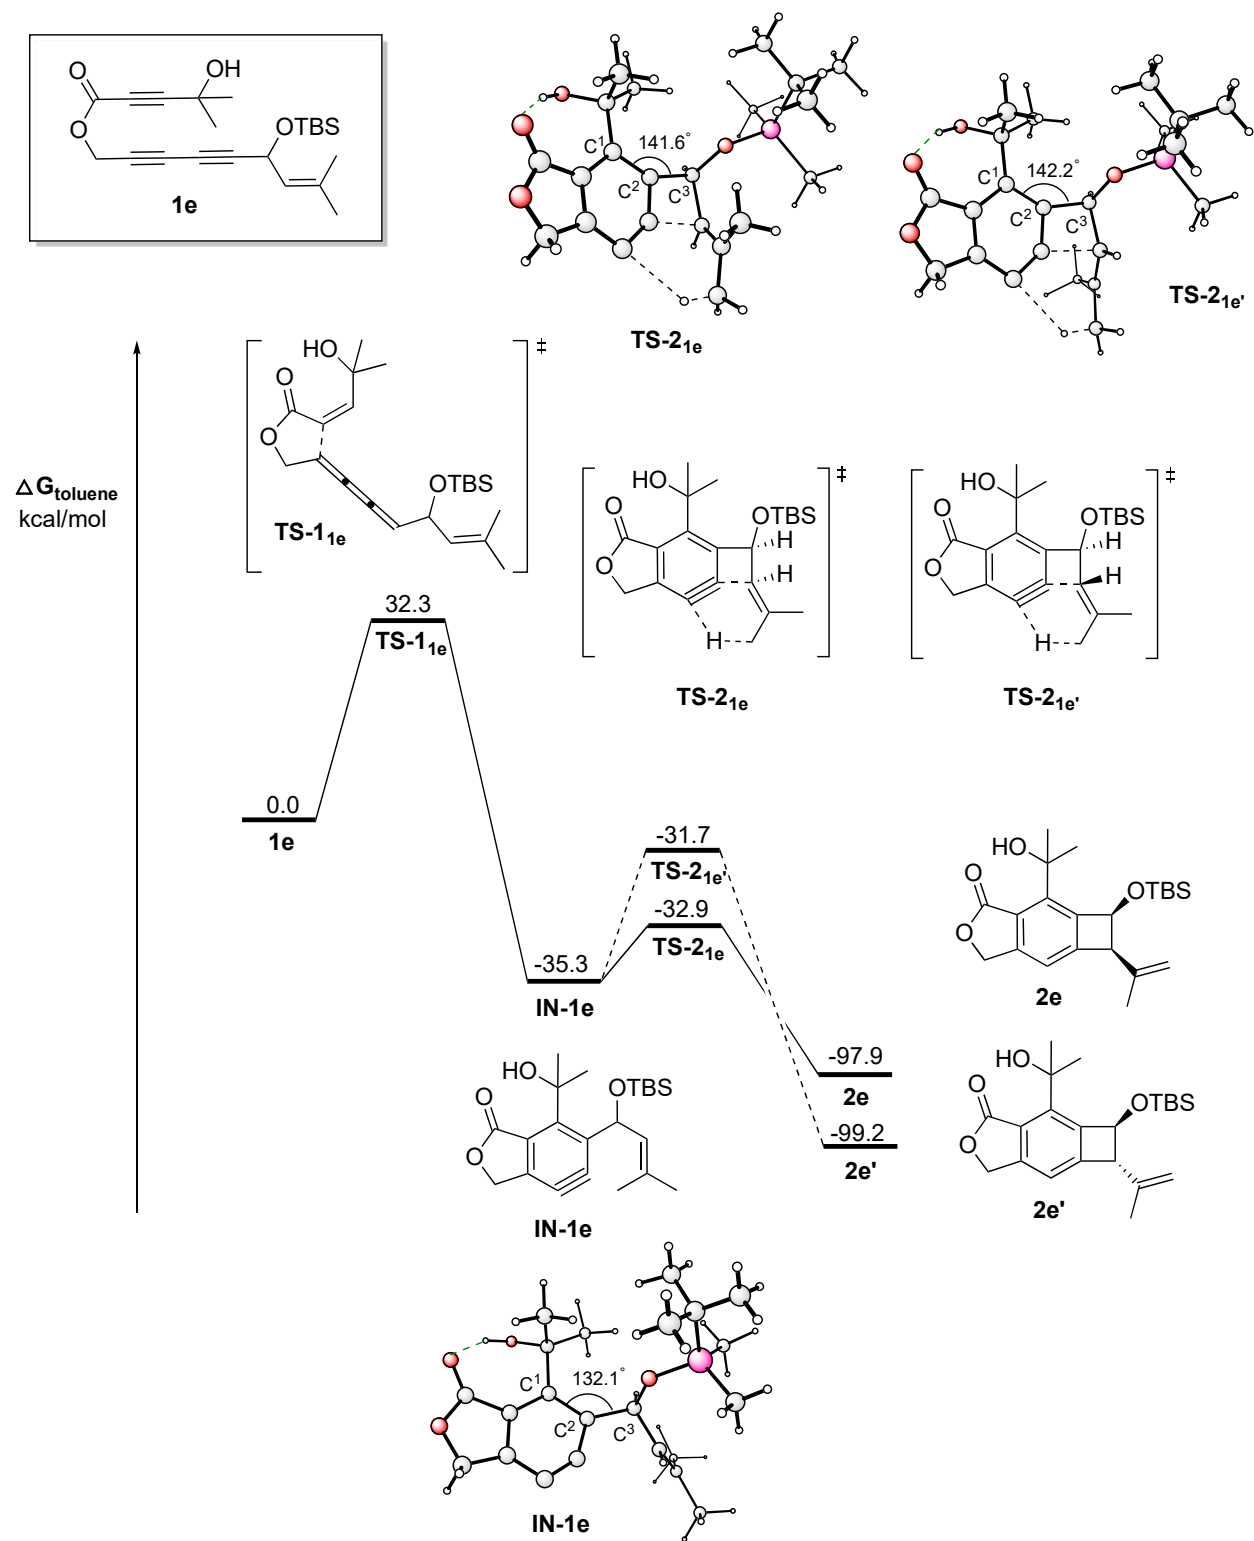





#### 4. Comparison of the reaction without hydrogen bonding for IN-1e

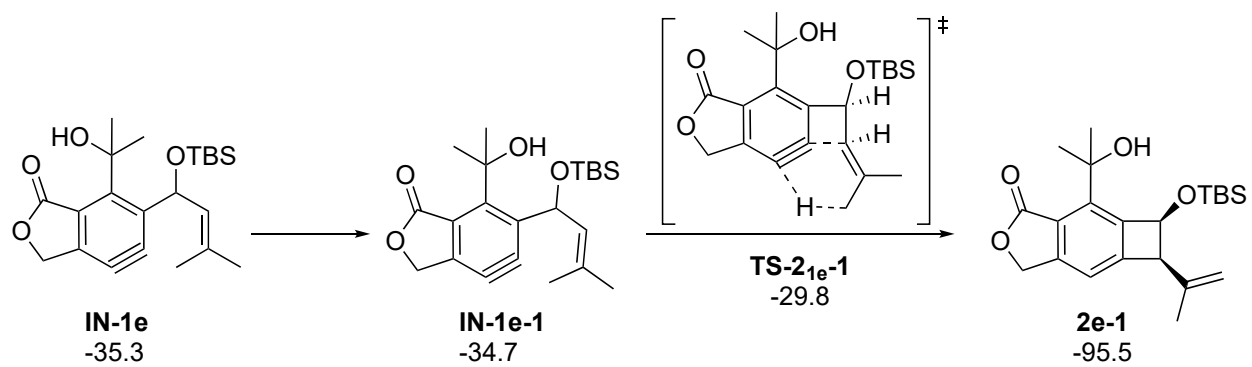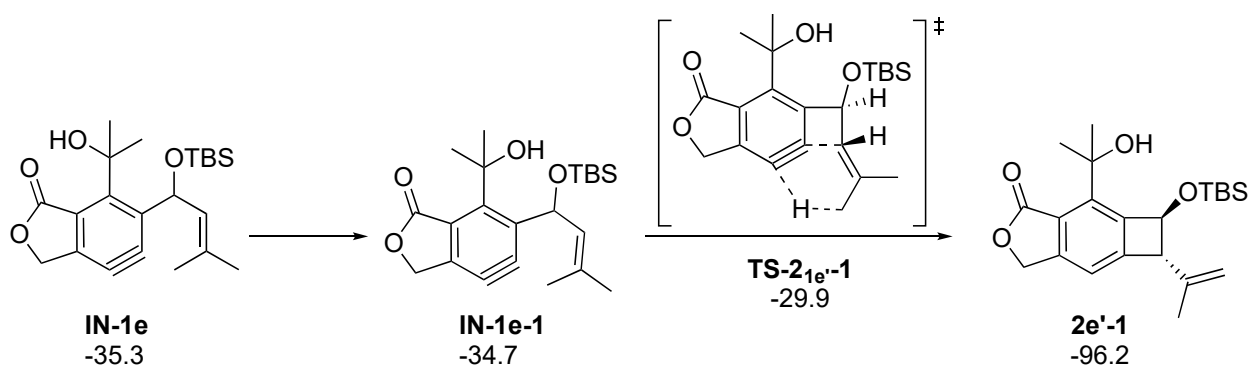

## 5. Reaction profile for 1g (*t*-butyl substituted substrate)

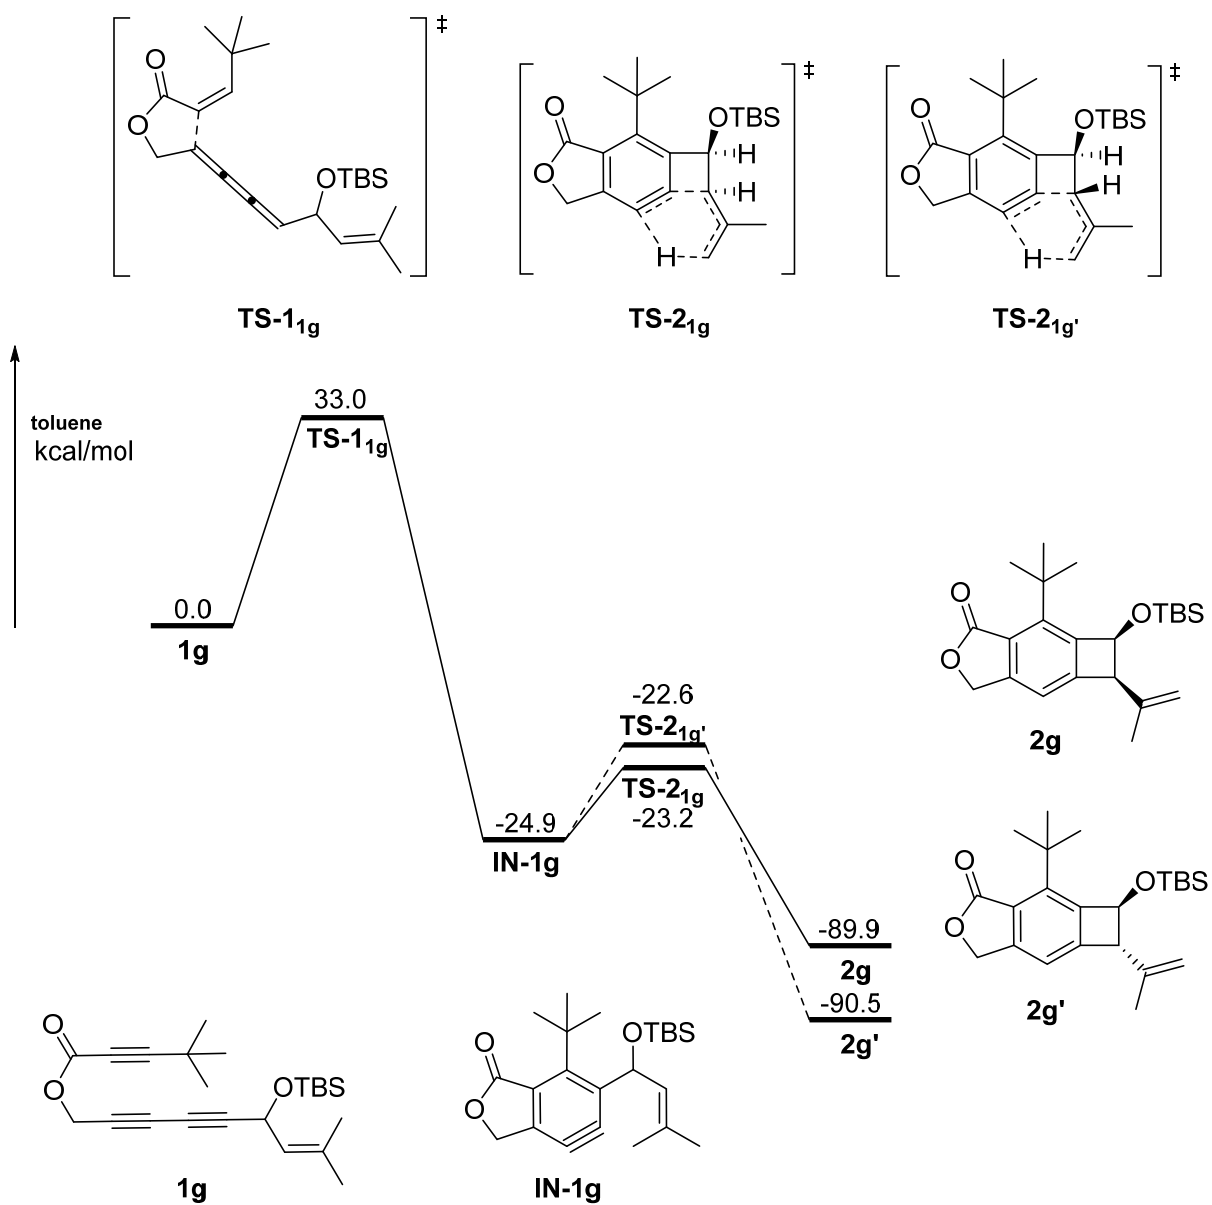

## 6. Calculated Energy Values

**Table S1.** Energies (in Hartree) calculated at SMD-M06/6-311++G(d,p)//B3LYP/6-31G(d)

| Species                     | $E_0^a$      | $H_{298}^b$  | $G_{298}^c$  | $E^d$        | $G_{Sol}^e$    |
|-----------------------------|--------------|--------------|--------------|--------------|----------------|
| <b>1e</b>                   | -1447.365375 | -1447.329308 | -1447.439061 | -1447.330252 | -1447.39734543 |
| <b>TS-1<sub>1e</sub></b>    | -1447.325627 | -1447.290548 | -1447.396384 | -1447.291492 | -1447.34114204 |
| <b>IN-1e</b>                | -1447.433618 | -1447.401206 | -1447.495928 | -1447.402150 | -1447.46500117 |
| <b>TS-2<sub>1e</sub></b>    | -1447.422274 | -1447.390901 | -1447.484143 | -1447.391845 | -1447.46068623 |
| <b>2e</b>                   | -1447.537567 | -1447.506475 | -1447.597295 | -1447.507419 | -1447.57016603 |
| <b>TS-2<sub>1e'</sub></b>   | -1447.424417 | -1447.392854 | -1447.485024 | -1447.393798 | -1447.45956518 |
| <b>2e'</b>                  | -1447.541054 | -1447.509590 | -1447.602361 | -1447.510535 | -1447.57001507 |
| <b>1h</b>                   | -1254.289172 | -1254.258565 | -1254.355942 | -1254.259509 | -1254.28800903 |
| <b>TS-1<sub>1h</sub></b>    | -1254.247490 | -1254.217869 | -1254.309956 | -1254.218813 | -1254.24141752 |
| <b>IN-1h</b>                | -1254.380471 | -1254.352562 | -1254.439719 | -1254.353506 | -1254.37803205 |
| <b>TS-2<sub>1h</sub></b>    | -1254.352709 | -1254.326015 | -1254.410066 | -1254.326959 | -1254.35756375 |
| <b>2h</b>                   | -1254.468509 | -1254.442058 | -1254.524947 | -1254.443002 | -1254.46612864 |
| <b>TS-2<sub>1h'</sub></b>   | -1254.353525 | -1254.326896 | -1254.409497 | -1254.327841 | -1254.35719017 |
| <b>2h'</b>                  | -1254.470143 | -1254.443661 | -1254.526190 | -1254.444606 | -1254.46600106 |
| <b>IN-1e-1</b>              | -1447.437869 | -1447.405392 | -1447.499792 | -1447.406337 | -1447.46448820 |
| <b>TS-2<sub>1e-1</sub></b>  | -1447.423750 | -1447.392393 | -1447.483469 | -1447.393337 | -1447.45787739 |
| <b>TS-2<sub>1e'-1</sub></b> | -1447.425236 | -1447.393828 | -1447.484677 | -1447.394772 | -1447.45813213 |
| <b>2e-1</b>                 | -1447.539281 | -1447.508081 | -1447.598921 | -1447.509025 | -1447.56636819 |
| <b>2e'-1</b>                | -1447.541852 | -1447.510608 | -1447.601546 | -1447.511552 | -1447.56749431 |

|                           |              |              |              |              |                |
|---------------------------|--------------|--------------|--------------|--------------|----------------|
| <b>1g</b>                 | -1411.446725 | -1411.410458 | -1411.520813 | -1411.411402 | -1411.47246507 |
| <b>TS-1<sub>1g</sub></b>  | -1411.402272 | -1411.367148 | -1411.472765 | -1411.368092 | -1411.42138399 |
| <b>IN-1g</b>              | -1411.497052 | -1411.464106 | -1411.559780 | -1411.465051 | -1411.52856100 |
| <b>TS-2<sub>1g</sub></b>  | -1411.487610 | -1411.455751 | -1411.549598 | -1411.456696 | -1411.52564579 |
| <b>2g</b>                 | -1411.604476 | -1411.572764 | -1411.665136 | -1411.573708 | -1411.63660189 |
| <b>TS-2<sub>1g'</sub></b> | -1411.489703 | -1411.457561 | -1411.551098 | -1411.458505 | -1411.52461829 |
| <b>2g'</b>                | -1411.607558 | -1411.575653 | -1411.669046 | -1411.576598 | -1411.63655990 |

<sup>a</sup> Sum of electronic and zero-point energies

<sup>b</sup> Sum of electronic and thermal enthalpies

<sup>c</sup> Sum of electronic and thermal free energies

<sup>d</sup> Electronic energies

<sup>e</sup> Single point energies in solution

## 5. Cartesian Coordinates for All Species

|           |             |             |             |                          |             |             |            |
|-----------|-------------|-------------|-------------|--------------------------|-------------|-------------|------------|
|           |             |             |             | H                        | 2.17480000  | 5.20270000  | 8.41229000 |
| <b>1e</b> |             |             |             | H                        | 1.80943600  | 6.78202200  | 7.70936800 |
| O         | -0.09613300 | -0.69891800 | -0.42611100 | H                        | 0.78921800  | 6.13956700  | 9.00157800 |
| C         | 0.40141500  | -1.91919500 | -0.08785800 | C                        | 1.31029400  | 4.87314800  | 5.78757500 |
| O         | 1.53146600  | -2.21239700 | -0.39880200 | H                        | 0.71087500  | 4.40167100  | 5.00133100 |
| C         | -1.44093100 | -0.33088900 | -0.04504800 | H                        | 1.75142200  | 5.78943500  | 5.36930300 |
| H         | -1.70012900 | 0.47621400  | -0.73682300 | H                        | 2.13841600  | 4.19588100  | 6.03091100 |
| H         | -2.12316900 | -1.16934700 | -0.22681500 | C                        | -0.65056900 | 6.20638400  | 6.61997800 |
| C         | -1.54186800 | 0.12455000  | 1.33624100  | H                        | -0.20457000 | 7.12070100  | 6.20222900 |
| C         | -1.62151800 | 0.51238600  | 2.48611100  | H                        | -1.31433600 | 5.78049000  | 5.85989900 |
| C         | -1.71706500 | 0.94765500  | 3.77658000  | H                        | -1.26772800 | 6.50787700  | 7.47543900 |
| C         | -1.80207500 | 1.33425000  | 4.92694800  | C                        | -1.90046000 | -4.62826900 | 2.02582500 |
| C         | -1.91224100 | 1.78215300  | 6.32446900  | C                        | -1.60608300 | -4.42807800 | 3.52545500 |
| H         | -1.37966400 | 1.04854300  | 6.94513600  | H                        | -1.90762100 | -3.43060000 | 3.86077500 |
| C         | -3.36666900 | 1.85754100  | 6.73743100  | H                        | -2.15597300 | -5.18250200 | 4.09689700 |
| H         | -3.90366700 | 2.66739000  | 6.24664600  | H                        | -0.53566400 | -4.54467200 | 3.72767000 |
| C         | -4.01962100 | 1.06816500  | 7.60352400  | C                        | -3.40246500 | -4.51344800 | 1.73119800 |
| C         | -3.42004600 | -0.10442800 | 8.34124500  | H                        | -3.78060800 | -3.52859100 | 2.02018100 |
| H         | -3.58444200 | -0.00326900 | 9.42240800  | H                        | -3.59016600 | -4.67211700 | 0.66589800 |
| H         | -3.91278100 | -1.03864800 | 8.03889800  | H                        | -3.93570200 | -5.28323900 | 2.29757500 |
| H         | -2.34748600 | -0.23032500 | 8.17405500  | O                        | -1.53401700 | -5.95076300 | 1.61498500 |
| C         | -5.48167000 | 1.30763800  | 7.89744600  | H                        | -0.57214000 | -6.03754300 | 1.71912000 |
| H         | -6.08365300 | 0.42483000  | 7.64091000  |                          |             |             |            |
| H         | -5.64134500 | 1.49314800  | 8.96858100  | <b>TS-1<sub>1e</sub></b> |             |             |            |
| H         | -5.87642500 | 2.16218200  | 7.34015200  | O                        | -4.68166000 | 0.39807200  | 2.08614300 |
| C         | -0.47498600 | -2.82130000 | 0.63239800  | C                        | -4.80058700 | -0.94141100 | 2.08208300 |
| C         | -1.13895000 | -3.62935500 | 1.24629600  | O                        | -5.61498800 | -1.50883700 | 1.38778500 |
| O         | -1.30108700 | 3.06629900  | 6.44205700  | C                        | -3.66304800 | 0.90147500  | 2.95279700 |
| Si        | -0.33937600 | 3.61535700  | 7.71669700  | H                        | -2.98003500 | 1.50129100  | 2.34336700 |
| C         | -1.40407900 | 3.95152200  | 9.24203800  | H                        | -4.14536000 | 1.55193100  | 3.69014000 |
| H         | -1.92990500 | 3.04178500  | 9.55518200  | C                        | -2.93104400 | -0.22320300 | 3.63290400 |
| H         | -0.79707200 | 4.29125400  | 10.09012100 | C                        | -1.94377900 | -0.25826300 | 4.41866800 |
| H         | -2.16368600 | 4.71561600  | 9.04370600  | C                        | -0.95758600 | -0.66479800 | 5.23485200 |
| C         | 0.95366300  | 2.30280900  | 8.14970400  | C                        | -0.04411000 | -1.00698900 | 5.98039700 |
| H         | 1.63842700  | 2.67491300  | 8.92141500  | C                        | 1.02966700  | -1.40394400 | 6.90480500 |
| H         | 0.49438300  | 1.38959600  | 8.54805300  | H                        | 0.55071800  | -1.63336100 | 7.86889300 |
| H         | 1.55478000  | 2.01959600  | 7.27858700  | C                        | 1.99101800  | -0.24863600 | 7.15461300 |
| C         | 0.45597700  | 5.20971400  | 7.02870300  | H                        | 1.95083900  | 0.16150900  | 8.16171600 |
| C         | 1.35392100  | 5.86192300  | 8.10279000  | C                        | 2.85039900  | 0.28561000  | 6.27364300 |

|    |             |             |            |              |             |             |             |
|----|-------------|-------------|------------|--------------|-------------|-------------|-------------|
| C  | 3.00108400  | -0.16892200 | 4.84477100 | H            | 4.47978700  | -5.46682500 | 7.89100900  |
| H  | 2.82276900  | 0.67047100  | 4.15880400 | H            | 3.81511500  | -3.82322800 | 7.90544600  |
| H  | 4.02965100  | -0.50877700 | 4.66148600 | H            | 2.97337700  | -5.13293700 | 8.75432900  |
| H  | 2.32568000  | -0.98393500 | 4.58536500 |              |             |             |             |
| C  | 3.75889100  | 1.41767600  | 6.68615400 | <b>IN-1e</b> |             |             |             |
| H  | 4.81394800  | 1.13691300  | 6.56364300 | O            | -2.44036800 | -0.80328800 | -0.46501100 |
| H  | 3.59604300  | 2.29969900  | 6.05145900 | C            | -1.65134200 | -1.08313600 | 0.61002900  |
| H  | 3.60374800  | 1.71306800  | 7.72827500 | O            | -0.62946200 | -1.72217300 | 0.44249700  |
| C  | -3.85194500 | -1.63732300 | 2.99578400 | C            | -3.58332400 | -0.02270700 | -0.08945100 |
| C  | -3.76269600 | -2.86420900 | 3.24531900 | H            | -3.57393500 | 0.91112900  | -0.66309500 |
| C  | -4.12528200 | -4.28427000 | 3.08145300 | H            | -4.49067000 | -0.58107600 | -0.34769200 |
| C  | -3.14827700 | -4.93957000 | 2.08253800 | C            | -3.41517200 | 0.18664100  | 1.38100600  |
| H  | -2.12151100 | -4.93115700 | 2.46383600 | C            | -4.15245800 | 0.88770500  | 2.32900600  |
| H  | -3.46126400 | -5.97530500 | 1.91627200 | C            | -3.65165000 | 0.87045600  | 3.47680100  |
| H  | -3.16990000 | -4.41173800 | 1.12395400 | C            | -2.56217000 | 0.33544900  | 4.13105000  |
| C  | -4.15253400 | -5.04669600 | 4.41375400 | C            | -2.35379200 | 0.65598300  | 5.61392600  |
| H  | -4.83546900 | -4.55823200 | 5.11402600 | H            | -2.15961100 | -0.26208200 | 6.16839100  |
| H  | -4.51214700 | -6.06467200 | 4.23204400 | C            | -3.61147400 | 1.31390600  | 6.13598000  |
| H  | -3.15410800 | -5.09357800 | 4.85824500 | H            | -3.76259700 | 2.32400800  | 5.75459000  |
| O  | -5.46772600 | -4.33751900 | 2.57254100 | C            | -4.52869100 | 0.79988200  | 6.97256500  |
| H  | -5.58942600 | -3.59077100 | 1.95224000 | C            | -4.47871800 | -0.58232000 | 7.57639600  |
| O  | 1.72953100  | -2.55969700 | 6.44539100 | H            | -4.58400200 | -0.52870400 | 8.66811600  |
| Si | 1.17054200  | -4.15740500 | 6.48822300 | H            | -5.32178800 | -1.18581600 | 7.21322200  |
| C  | 0.08044400  | -4.40804800 | 8.01441600 | H            | -3.56022200 | -1.12911900 | 7.35171100  |
| H  | -0.83967600 | -3.81439300 | 7.95413100 | C            | -5.74486500 | 1.60642500  | 7.36100800  |
| H  | -0.22263400 | -5.45850600 | 8.10125300 | H            | -6.66769600 | 1.08968200  | 7.06392200  |
| H  | 0.59523200  | -4.13674500 | 8.94325200 | H            | -5.79746400 | 1.73552200  | 8.45079500  |
| C  | 0.16061800  | -4.53572500 | 4.93681300 | H            | -5.74607800 | 2.59746200  | 6.89763000  |
| H  | -0.70552900 | -3.86797000 | 4.86734900 | C            | -2.24934300 | -0.46791700 | 1.83412200  |
| H  | 0.75383000  | -4.40016800 | 4.02541700 | C            | -1.79795800 | -0.44362700 | 3.19784400  |
| H  | -0.20892600 | -5.56873600 | 4.94670800 | O            | -1.22048300 | 1.52503600  | 5.73105500  |
| C  | 2.76549500  | -5.20932500 | 6.56237200 | Si           | -0.65600700 | 2.29407000  | 7.13161700  |
| C  | 2.40836300  | -6.71155300 | 6.54934700 | C            | -1.74557800 | 3.77195800  | 7.58588900  |
| H  | 1.87716200  | -7.00210500 | 5.63463600 | H            | -2.75509900 | 3.45007900  | 7.86033400  |
| H  | 3.32250400  | -7.32027200 | 6.60093400 | H            | -1.32816700 | 4.31730400  | 8.44107000  |
| H  | 1.78294500  | -6.99511700 | 7.40518300 | H            | -1.83512000 | 4.47893400  | 6.75295300  |
| C  | 3.65815700  | -4.88947900 | 5.34359800 | C            | -0.63805500 | 1.06902200  | 8.57351300  |
| H  | 3.93473200  | -3.82986500 | 5.31362900 | H            | -0.18486100 | 1.52068100  | 9.46444200  |
| H  | 4.58701200  | -5.47686300 | 5.38673800 | H            | -1.65489300 | 0.76504900  | 8.84814900  |
| H  | 3.16287700  | -5.13488000 | 4.39613300 | H            | -0.07006300 | 0.16189400  | 8.33764300  |
| C  | 3.54770500  | -4.88454400 | 7.85320700 | C            | 1.10864400  | 2.88928000  | 6.68107800  |

|                          |             |             |             |    |             |             |            |
|--------------------------|-------------|-------------|-------------|----|-------------|-------------|------------|
| C                        | 1.65696400  | 3.78309800  | 7.81617000  | H  | -3.95997900 | 3.72813000  | 4.32925100 |
| H                        | 1.70469800  | 3.25275100  | 8.77591400  | H  | -3.41934700 | 4.21422600  | 5.93437400 |
| H                        | 2.67875100  | 4.11161600  | 7.57810600  | H  | -2.31835700 | 3.29193300  | 4.88361800 |
| H                        | 1.05119600  | 4.68524400  | 7.96020400  | C  | -5.41823200 | 2.15241700  | 5.97284000 |
| C                        | 2.06173300  | 1.68908700  | 6.49786700  | H  | -5.81895600 | 3.15231600  | 6.16208000 |
| H                        | 1.73226900  | 1.02091700  | 5.69534900  | H  | -5.83925700 | 1.78175000  | 5.01020500 |
| H                        | 3.07061400  | 2.04118000  | 6.23760800  | H  | -5.74486200 | 1.46642400  | 6.75969400 |
| H                        | 2.15310800  | 1.09361900  | 7.41448800  | C  | -2.75377900 | -0.28859300 | 1.85346200 |
| C                        | 1.07017600  | 3.70809900  | 5.37247100  | C  | -1.74026300 | -0.17688300 | 2.85512400 |
| H                        | 2.08064300  | 4.05285900  | 5.10878000  | O  | -0.85018800 | 1.66553000  | 5.66944200 |
| H                        | 0.68879400  | 3.11501400  | 4.53446200  | Si | 0.01037800  | 1.98445700  | 7.09876900 |
| H                        | 0.43679800  | 4.59915500  | 5.46552100  | C  | -1.15921300 | 2.67324700  | 8.41660400 |
| C                        | -0.50128300 | -1.23764600 | 3.58097500  | H  | -1.96739200 | 1.96691500  | 8.64108600 |
| C                        | 0.71892100  | -0.42440100 | 3.09932900  | H  | -0.62224600 | 2.85852900  | 9.35465300 |
| H                        | 0.74033500  | 0.55922700  | 3.57852200  | H  | -1.62140000 | 3.61727500  | 8.10695700 |
| H                        | 1.63543600  | -0.96618300 | 3.35836800  | C  | 0.77987400  | 0.38666400  | 7.75374200 |
| H                        | 0.70134500  | -0.28480700 | 2.01530900  | H  | 1.38632100  | 0.59313500  | 8.64417100 |
| C                        | -0.34271400 | -1.56002700 | 5.07168200  | H  | 0.01495900  | -0.34088600 | 8.05119900 |
| H                        | -0.16584200 | -0.67347400 | 5.67961200  | H  | 1.42771300  | -0.09719700 | 7.01498100 |
| H                        | -1.20975000 | -2.11382300 | 5.44563200  | C  | 1.32964100  | 3.26731000  | 6.58677400 |
| H                        | 0.52550000  | -2.21930700 | 5.15679300  | C  | 2.14026100  | 3.69425100  | 7.83194600 |
| O                        | -0.54127700 | -2.52543200 | 2.98514400  | H  | 2.66141500  | 2.84796900  | 8.29664600 |
| H                        | -0.36403200 | -2.42135000 | 2.02794000  | H  | 2.90667700  | 4.42951300  | 7.54893600 |
| <b>TS-2<sub>1e</sub></b> |             |             |             | H  | 1.50961800  | 4.16295200  | 8.59752800 |
| O                        | -3.86874800 | -0.63942000 | -0.15097100 | C  | 2.29337600  | 2.65987700  | 5.54449700 |
| C                        | -2.63909600 | -0.69194200 | 0.42651300  | H  | 1.76664000  | 2.35697400  | 4.63298400 |
| O                        | -1.66832200 | -1.01246300 | -0.23767100 | H  | 3.05510200  | 3.39865700  | 5.25725500 |
| C                        | -4.86249900 | -0.21546900 | 0.79823000  | H  | 2.82280300  | 1.78220600  | 5.93442000 |
| H                        | -5.34761900 | 0.68876600  | 0.41361100  | C  | 0.65626000  | 4.51476000  | 5.97396900 |
| H                        | -5.61906200 | -1.00400100 | 0.88523600  | H  | 1.41836500  | 5.25455400  | 5.68999200 |
| C                        | -4.11111500 | 0.02326600  | 2.07796600  | H  | 0.08681200  | 4.26500900  | 5.07190100 |
| C                        | -4.63478200 | 0.52140300  | 3.29392300  | H  | -0.02504800 | 5.00594200  | 6.67971200 |
| C                        | -3.59927900 | 0.60081100  | 4.09873700  | C  | -0.26517000 | -0.57268600 | 2.60905500 |
| C                        | -2.22975500 | 0.35446700  | 4.06025100  | C  | 0.43763900  | 0.56909600  | 1.84376800 |
| C                        | -1.80875500 | 0.64281300  | 5.49898100  | H  | 0.40776200  | 1.50494400  | 2.41355900 |
| H                        | -1.48049700 | -0.27060300 | 6.01150000  | H  | 1.48342800  | 0.29374200  | 1.66796600 |
| C                        | -3.26025900 | 0.96674900  | 5.94710500  | H  | -0.03979800 | 0.73774700  | 0.87377400 |
| H                        | -3.76429600 | 0.18069600  | 6.50786300  | C  | 0.47926000  | -0.86698100 | 3.91550300 |
| C                        | -3.94064800 | 2.15792600  | 5.77428800  | H  | 0.56313500  | 0.01758500  | 4.54847500 |
| C                        | -3.35612700 | 3.40984200  | 5.18839100  | H  | -0.02039100 | -1.67052300 | 4.46696300 |
|                          |             |             |             | H  | 1.48422400  | -1.21456000 | 3.65892300 |



|           |             |             |             |                           |             |             |             |
|-----------|-------------|-------------|-------------|---------------------------|-------------|-------------|-------------|
| O         | -0.18300900 | -1.79217300 | 1.88630800  | H                         | 1.58642300  | 2.70830800  | 8.87044000  |
| H         | -0.51861400 | -1.62278600 | 0.98119000  | H                         | 1.85162300  | 4.40123900  | 8.43571000  |
|           |             |             |             | H                         | 0.39080700  | 3.93963500  | 9.31575600  |
| <b>2e</b> |             |             |             | C                         | 1.40447600  | 2.98347200  | 6.11317000  |
| O         | -3.29492800 | -1.16048900 | -0.30717500 | H                         | 0.93981000  | 2.83485400  | 5.13246200  |
| C         | -2.25916200 | -1.24874200 | 0.57549300  | H                         | 2.18141200  | 3.75393000  | 6.00292100  |
| O         | -1.22254900 | -1.79080900 | 0.24310800  | H                         | 1.91016100  | 2.05002100  | 6.38919000  |
| C         | -4.40502500 | -0.46376100 | 0.27462300  | C                         | -0.27033300 | 4.75123300  | 6.73707900  |
| H         | -4.63745400 | 0.40210300  | -0.35625800 | H                         | 0.50308700  | 5.52583300  | 6.63134500  |
| H         | -5.27247300 | -1.13445400 | 0.27431700  | H                         | -0.78193300 | 4.66222800  | 5.77257700  |
| C         | -3.94822000 | -0.08612400 | 1.65508700  | H                         | -0.99929800 | 5.11568900  | 7.47083000  |
| C         | -4.63493300 | 0.64779300  | 2.62106700  | C                         | -0.49874400 | -0.98746100 | 3.26387900  |
| C         | -3.90069600 | 0.86831800  | 3.77539300  | C                         | 0.53064100  | -0.08983100 | 2.54485700  |
| C         | -2.60840700 | 0.36888800  | 3.98755600  | H                         | 0.51067300  | 0.93160800  | 2.94116500  |
| C         | -2.56953800 | 0.91889300  | 5.42468400  | H                         | 1.53271100  | -0.50640600 | 2.69405200  |
| H         | -2.68375200 | 0.11175500  | 6.16251400  | H                         | 0.33248700  | -0.05039300 | 1.46931500  |
| C         | -4.00392000 | 1.57649600  | 5.11612300  | C                         | -0.15172300 | -1.09711600 | 4.75010900  |
| H         | -4.78424200 | 1.17541900  | 5.77472500  | H                         | -0.11618400 | -0.11855300 | 5.22913500  |
| C         | -4.11384900 | 3.08448900  | 5.07804700  | H                         | -0.87970500 | -1.73095500 | 5.26739300  |
| C         | -3.28810900 | 3.82935800  | 4.05743600  | H                         | 0.82879100  | -1.57456200 | 4.83643000  |
| H         | -3.40746600 | 4.91142000  | 4.16794200  | O                         | -0.43074500 | -2.32506700 | 2.78660100  |
| H         | -2.22656700 | 3.58006100  | 4.15578100  | H                         | -0.48393800 | -2.29511800 | 1.81005100  |
| H         | -3.58431600 | 3.55671000  | 3.03632500  |                           |             |             |             |
| C         | -4.95136100 | 3.71848000  | 5.90803300  | <b>TS-2<sub>1e'</sub></b> |             |             |             |
| H         | -5.05540300 | 4.80062200  | 5.89440400  | O                         | -2.59568600 | -1.33598100 | -0.16467300 |
| H         | -5.64048700 | 1.02829400  | 2.46290600  | C                         | -1.78333100 | -1.38969100 | 0.92525900  |
| H         | -5.56409600 | 3.18130900  | 6.62795600  | O                         | -0.71101900 | -1.96522800 | 0.85584200  |
| C         | -2.64859700 | -0.58103000 | 1.84724600  | C                         | -3.79441900 | -0.59738200 | 0.12589300  |
| C         | -1.91141200 | -0.40342700 | 3.05148800  | H                         | -3.86688500 | 0.23860900  | -0.57924400 |
| O         | -1.51671300 | 1.77602200  | 5.78132600  | H                         | -4.65642700 | -1.25659800 | -0.02903300 |
| Si        | -0.97251000 | 2.06426700  | 7.36489900  | C                         | -3.64623700 | -0.15186100 | 1.55316400  |
| C         | -2.40132600 | 2.62199900  | 8.46836100  | C                         | -4.55564300 | 0.61401800  | 2.31821500  |
| H         | -3.13539700 | 1.81637800  | 8.59417900  | C                         | -3.97001200 | 0.80641100  | 3.47072700  |
| H         | -2.03845300 | 2.88587100  | 9.46955700  | C                         | -2.80681800 | 0.40761800  | 4.12150600  |
| H         | -2.92967200 | 3.48611100  | 8.05458700  | C                         | -2.93821500 | 1.09990800  | 5.47550300  |
| C         | -0.26194300 | 0.47194700  | 8.09856800  | H                         | -3.07382900 | 0.39909400  | 6.30871500  |
| H         | -0.02828400 | 0.61276700  | 9.16091700  | C                         | -4.25313800 | 1.81477500  | 5.07188200  |
| H         | -0.98198100 | -0.35293500 | 8.03545500  | H                         | -4.10699200 | 2.84053300  | 4.73928800  |
| H         | 0.65370000  | 0.14467900  | 7.59498700  | C                         | -5.54070900 | 1.33514300  | 5.20482500  |
| C         | 0.36830300  | 3.41527900  | 7.17250300  | C                         | -5.88618800 | 0.01913000  | 5.83737100  |
| C         | 1.08345000  | 3.62012300  | 8.52685200  | H                         | -6.67333700 | 0.16872700  | 6.58750800  |

|    |             |             |            |            |             |             |             |
|----|-------------|-------------|------------|------------|-------------|-------------|-------------|
| H  | -6.29832900 | -0.66026600 | 5.07894000 | H          | -0.34245600 | -2.36597900 | 2.55533900  |
| H  | -5.03885500 | -0.47462600 | 6.31660900 |            |             |             |             |
| C  | -6.62472000 | 2.00929400  | 4.43758200 | <b>2e'</b> |             |             |             |
| H  | -6.53800600 | 1.61725700  | 3.39694300 | O          | -2.57195200 | -1.57640400 | -0.15451000 |
| H  | -7.62316700 | 1.77106900  | 4.81487700 | C          | -1.72646100 | -1.55246600 | 0.91537500  |
| H  | -6.49776100 | 3.09444200  | 4.38326500 | O          | -0.64708900 | -2.10894400 | 0.85086100  |
| C  | -2.42033200 | -0.64662100 | 2.04429500 | C          | -3.77165900 | -0.84192100 | 0.12537400  |
| C  | -1.94195300 | -0.40426000 | 3.37073800 | H          | -3.87534900 | -0.05169400 | -0.62734100 |
| O  | -1.90342700 | 2.01532900  | 5.76028100 | H          | -4.62449700 | -1.52441600 | 0.02976800  |
| Si | -1.65884100 | 2.82709800  | 7.22800800 | C          | -3.58957800 | -0.31245200 | 1.51985600  |
| C  | -3.14055800 | 3.94249100  | 7.60578400 | C          | -4.45141000 | 0.50335700  | 2.25320500  |
| H  | -4.06952900 | 3.36401900  | 7.67732400 | C          | -3.95358800 | 0.85438000  | 3.49792400  |
| H  | -3.00565800 | 4.45709400  | 8.56486300 | C          | -2.72800800 | 0.40156300  | 4.00137000  |
| H  | -3.28643000 | 4.70881600  | 6.83600500 | C          | -2.93617200 | 1.12015400  | 5.34041300  |
| C  | -1.47938700 | 1.56510000  | 8.62424100 | H          | -3.11077600 | 0.43186400  | 6.17739100  |
| H  | -1.25435600 | 2.06488000  | 9.57424800 | C          | -4.29924600 | 1.68963800  | 4.72428200  |
| H  | -2.40442000 | 0.99510900  | 8.77507100 | H          | -4.18000100 | 2.76147900  | 4.53201200  |
| H  | -0.67659700 | 0.84654400  | 8.42665700 | C          | -5.60632000 | 1.43464100  | 5.43664600  |
| C  | -0.06589500 | 3.84055600  | 6.94304500 | C          | -5.96754100 | 0.00198000  | 5.75106200  |
| C  | 0.22142600  | 4.71874400  | 8.18195600 | H          | -5.22181400 | -0.47279000 | 6.40201300  |
| H  | 0.36850600  | 4.11982500  | 9.08958700 | H          | -6.93738500 | -0.06096600 | 6.25299300  |
| H  | 1.14101400  | 5.30056800  | 8.02689900 | H          | -6.01415600 | -0.60551300 | 4.83846200  |
| H  | -0.58522500 | 5.43556300  | 8.37903300 | C          | -6.41859800 | 2.45023700  | 5.75603100  |
| C  | 1.13389500  | 2.89796100  | 6.70769700 | H          | -5.40829200 | 0.84303900  | 1.86593400  |
| H  | 0.98555100  | 2.26118200  | 5.82870400 | H          | -7.36503000 | 2.28574600  | 6.26522300  |
| H  | 2.04904700  | 3.48397400  | 6.54076500 | H          | -6.16922000 | 3.48061200  | 5.51557900  |
| H  | 1.31915600  | 2.24525900  | 7.56951800 | C          | -2.35137800 | -0.76005200 | 2.00806300  |
| C  | -0.23960100 | 4.75043800  | 5.70716600 | C          | -1.85913600 | -0.44185300 | 3.30451900  |
| H  | 0.67641500  | 5.33288500  | 5.53287200 | O          | -1.96646900 | 2.08176300  | 5.67162600  |
| H  | -0.44223800 | 4.16707300  | 4.80263600 | Si         | -1.80267600 | 2.89014600  | 7.15019200  |
| H  | -1.05990100 | 5.46758600  | 5.83654900 | C          | -3.26914900 | 4.04890500  | 7.42763000  |
| C  | -0.60636500 | -0.97637400 | 3.90294600 | H          | -4.21512600 | 3.49535000  | 7.42566800  |
| C  | 0.56089700  | -0.12907800 | 3.35484600 | H          | -3.18865600 | 4.56177500  | 8.39385000  |
| H  | 0.46806100  | 0.91828400  | 3.66343400 | H          | -3.33260700 | 4.81651500  | 6.64781200  |
| H  | 1.50672300  | -0.52959100 | 3.73629400 | C          | -1.74274600 | 1.62608600  | 8.55601200  |
| H  | 0.58906400  | -0.16820500 | 2.26173600 | H          | -1.56620900 | 2.12154300  | 9.51848400  |
| C  | -0.56372900 | -1.00669300 | 5.43458600 | H          | -2.69045500 | 1.08144800  | 8.64717300  |
| H  | -0.58931000 | -0.00444400 | 5.86476900 | H          | -0.94771400 | 0.88651700  | 8.41054800  |
| H  | -1.39700400 | -1.59898900 | 5.82773400 | C          | -0.16617300 | 3.86160400  | 6.97255100  |
| H  | 0.36565600  | -1.49850500 | 5.73608500 | C          | 0.06555800  | 4.72637100  | 8.23198900  |
| O  | -0.46576400 | -2.33906300 | 3.52738000 | H          | 0.14100500  | 4.11953800  | 9.14313000  |

|   |             |             |            |
|---|-------------|-------------|------------|
| H | 1.00666300  | 5.28693700  | 8.13860600 |
| H | -0.73503800 | 5.46086400  | 8.38299100 |
| C | 1.02234900  | 2.89129300  | 6.80544900 |
| H | 0.91044300  | 2.26063900  | 5.91666400 |
| H | 1.96040800  | 3.45446200  | 6.69550000 |
| H | 1.13995300  | 2.23121300  | 7.67352300 |
| C | -0.23911300 | 4.78224700  | 5.73472900 |
| H | 0.70076400  | 5.34154800  | 5.62024500 |
| H | -0.40134700 | 4.20891900  | 4.81556800 |
| H | -1.04722100 | 5.51951500  | 5.81837800 |
| C | -0.51633600 | -0.96738500 | 3.85406300 |
| C | 0.63325300  | -0.12787800 | 3.25763400 |
| H | 0.52894600  | 0.93069700  | 3.52060900 |
| H | 1.58689600  | -0.49796700 | 3.64955700 |
| H | 0.65473500  | -0.21460200 | 2.16679400 |
| C | -0.47085000 | -0.91305400 | 5.38474700 |
| H | -0.53180300 | 0.11049800  | 5.75779000 |
| H | -1.28535600 | -1.50753500 | 5.81172800 |
| H | 0.47401800  | -1.35680100 | 5.71161000 |
| O | -0.35271300 | -2.34590200 | 3.54659300 |
| H | -0.21966700 | -2.42081300 | 2.58000800 |

**1h**

|   |             |             |             |
|---|-------------|-------------|-------------|
| O | -2.95247800 | -1.10587600 | -1.02967500 |
| C | -2.62958500 | -2.41895500 | -0.91169700 |
| O | -3.46811900 | -3.26687200 | -1.09835400 |
| C | -1.97003500 | -0.07947700 | -0.75082400 |
| H | -1.00129100 | -0.36308700 | -1.17752800 |
| H | -2.34079600 | 0.79412700  | -1.29513400 |
| C | -1.84226700 | 0.21070900  | 0.67103900  |
| C | -1.74251000 | 0.45074400  | 1.85889200  |
| C | -1.62225400 | 0.72083700  | 3.19149600  |
| C | -1.51626100 | 0.95973100  | 4.37941900  |
| C | -1.41344600 | 1.26435700  | 5.81495100  |
| H | -2.33792800 | 0.90948500  | 6.29049000  |
| C | -1.25851300 | 2.75614700  | 6.02305800  |
| H | -0.29208100 | 3.13234200  | 5.69159700  |
| C | -2.15201500 | 3.61184300  | 6.54293600  |
| C | -3.53865800 | 3.24730600  | 7.01513000  |
| H | -3.69893600 | 3.59748500  | 8.04354300  |
| H | -4.29595900 | 3.74644600  | 6.39535000  |

|    |             |             |             |
|----|-------------|-------------|-------------|
| H  | -3.74730300 | 2.17514400  | 6.98682300  |
| C  | -1.81496300 | 5.07844500  | 6.67279900  |
| H  | -2.52116900 | 5.69456700  | 6.09917200  |
| H  | -1.89182700 | 5.40802600  | 7.71806100  |
| H  | -0.80427600 | 5.29966200  | 6.31746500  |
| C  | -1.25189600 | -2.74397800 | -0.57946700 |
| C  | -0.12618700 | -3.08838800 | -0.30729400 |
| O  | -0.29249200 | 0.55878300  | 6.34466600  |
| Si | -0.08010400 | 0.02441300  | 7.93241500  |
| C  | 0.53800000  | 1.43631200  | 9.02600700  |
| H  | -0.17241600 | 2.27080200  | 9.01653000  |
| H  | 0.66046800  | 1.11423500  | 10.06734300 |
| H  | 1.50271100  | 1.82272500  | 8.67864900  |
| C  | -1.72446700 | -0.61385400 | 8.61789500  |
| H  | -1.58155200 | -1.05639900 | 9.61124100  |
| H  | -2.45756600 | 0.19381700  | 8.73328700  |
| H  | -2.16949700 | -1.38170900 | 7.97506800  |
| C  | 1.22134500  | -1.36700600 | 7.77078000  |
| C  | 1.59204800  | -1.91504400 | 9.16576200  |
| H  | 0.72610800  | -2.34278400 | 9.68680600  |
| H  | 2.34114200  | -2.71477200 | 9.07434700  |
| H  | 2.02311900  | -1.13992900 | 9.81135400  |
| C  | 0.65209400  | -2.51262400 | 6.90688600  |
| H  | 0.36454700  | -2.15956900 | 5.91039700  |
| H  | 1.40435500  | -3.30450500 | 6.77772600  |
| H  | -0.22956300 | -2.97515400 | 7.36792500  |
| C  | 2.49154700  | -0.81067900 | 7.09153000  |
| H  | 3.24284000  | -1.60601500 | 6.97872400  |
| H  | 2.27332200  | -0.41203000 | 6.09500400  |
| H  | 2.95351800  | -0.00893500 | 7.68097700  |
| H  | 0.86380000  | -3.40189700 | -0.05957900 |

**TS-1<sub>1h</sub>**

|   |             |             |             |
|---|-------------|-------------|-------------|
| O | -0.50520700 | -2.02758000 | 0.02673400  |
| C | 0.38528400  | -1.59892500 | 0.95650700  |
| O | 1.19911200  | -2.34584900 | 1.43018000  |
| C | -1.43034900 | -1.05289700 | -0.45682300 |
| H | -1.32459100 | -1.00532400 | -1.54661900 |
| H | -2.44114800 | -1.40468900 | -0.21910300 |
| C | -1.16265200 | 0.27420600  | 0.16583700  |
| C | -1.54695100 | 1.48468500  | 0.17786700  |

|    |             |             |             |              |             |             |             |
|----|-------------|-------------|-------------|--------------|-------------|-------------|-------------|
| C  | -1.13443300 | 2.56129700  | 0.88014600  |              |             |             |             |
| C  | -0.52992500 | 3.29452900  | 1.65904400  | <b>IN-1h</b> |             |             |             |
| C  | 0.09747200  | 4.32461300  | 2.50154100  | O            | -0.54414900 | -1.59579500 | -0.01066000 |
| H  | -0.70468100 | 4.87765100  | 3.00758900  | C            | 0.14634100  | -0.98852800 | 1.01947400  |
| C  | 0.92759600  | 5.26125400  | 1.65086800  | O            | 0.87843800  | -1.60416600 | 1.75132200  |
| H  | 1.82427800  | 4.79133200  | 1.25006500  | C            | -1.34947200 | -0.65167000 | -0.73877700 |
| C  | 0.66354200  | 6.54040700  | 1.34033500  | H            | -1.03445700 | -0.65841500 | -1.78889100 |
| C  | -0.55758500 | 7.31105100  | 1.77974800  | H            | -2.39664800 | -0.97250800 | -0.68895500 |
| H  | -0.26572300 | 8.25378800  | 2.26140800  | C            | -1.09859800 | 0.65936700  | -0.05400600 |
| H  | -1.16805000 | 7.58393100  | 0.90819800  | C            | -1.48662800 | 1.98350500  | -0.16269600 |
| H  | -1.20089300 | 6.76250400  | 2.47161300  | C            | -1.06695400 | 2.87654300  | 0.60710300  |
| C  | 1.61009200  | 7.32144500  | 0.46006800  | C            | -0.18693500 | 2.80832700  | 1.68349600  |
| H  | 1.10164300  | 7.66678000  | -0.45065800 | C            | 0.25812600  | 3.97998600  | 2.54411100  |
| H  | 1.97188500  | 8.22177900  | 0.97535400  | H            | -0.64813600 | 4.43883300  | 2.96116300  |
| H  | 2.47756400  | 6.72635700  | 0.15996000  | C            | 1.00936400  | 4.98650900  | 1.70041100  |
| C  | 0.23255400  | -0.15030800 | 1.29649600  | H            | 1.98885400  | 4.62976500  | 1.38264000  |
| C  | 0.78007400  | 0.67060200  | 2.06382300  | C            | 0.60325500  | 6.20354700  | 1.30499500  |
| O  | 0.90558500  | 3.66289300  | 3.48706100  | C            | -0.73217900 | 6.82709800  | 1.63240900  |
| Si | 1.49989900  | 4.38163800  | 4.90691700  | H            | -0.59358000 | 7.82113600  | 2.07827700  |
| C  | 3.12521500  | 5.27380800  | 4.54875600  | H            | -1.31875600 | 6.97734400  | 0.71575900  |
| H  | 2.96771200  | 6.09358700  | 3.83926500  | H            | -1.33953500 | 6.23091500  | 2.31739000  |
| H  | 3.55842400  | 5.70024200  | 5.46186800  | C            | 1.49678500  | 7.06327400  | 0.44213200  |
| H  | 3.86752800  | 4.59650600  | 4.11184400  | H            | 1.01019000  | 7.29752300  | -0.51479000 |
| C  | 0.23099900  | 5.62138900  | 5.56510700  | H            | 1.70454200  | 8.02599000  | 0.92923600  |
| H  | 0.56071100  | 6.02796500  | 6.52873400  | H            | 2.45200500  | 6.57517400  | 0.22708000  |
| H  | 0.10314900  | 6.47307800  | 4.88673800  | C            | -0.19816100 | 0.45427700  | 1.00458500  |
| H  | -0.75308600 | 5.16450500  | 5.72116800  | C            | 0.25347500  | 1.47688700  | 1.85346500  |
| C  | 1.75169800  | 2.92709600  | 6.12227400  | O            | 1.06735700  | 3.47923100  | 3.59849100  |
| C  | 2.26771300  | 3.46997100  | 7.47412700  | Si           | 1.55545800  | 4.31070400  | 4.98851700  |
| H  | 1.55692100  | 4.16272700  | 7.94123400  | C            | 3.12277300  | 5.30488300  | 4.63700700  |
| H  | 2.42373500  | 2.64156000  | 8.17957500  | H            | 2.93650400  | 6.05713200  | 3.86254500  |
| H  | 3.22714000  | 3.99162400  | 7.37072400  | H            | 3.47436200  | 5.82901200  | 5.53420600  |
| C  | 0.41366100  | 2.19110600  | 6.35074400  | H            | 3.93710600  | 4.66159800  | 4.28521100  |
| H  | 0.00237900  | 1.79690100  | 5.41493300  | C            | 0.18026600  | 5.48548900  | 5.54268100  |
| H  | 0.55704900  | 1.34278400  | 7.03520600  | H            | 0.44462000  | 5.96756300  | 6.49167400  |
| H  | -0.34279000 | 2.84659400  | 6.79991500  | H            | 0.01633100  | 6.28503400  | 4.81069400  |
| C  | 2.78690800  | 1.92559100  | 5.56402200  | H            | -0.77334400 | 4.96609900  | 5.69190500  |
| H  | 2.93574900  | 1.09961400  | 6.27407500  | C            | 1.87275900  | 2.93359400  | 6.27685100  |
| H  | 2.46249800  | 1.48174100  | 4.61622000  | C            | 2.35537500  | 3.55869700  | 7.60388700  |
| H  | 3.76578600  | 2.39143600  | 5.39784700  | H            | 1.60951900  | 4.23724700  | 8.03641400  |
| H  | 1.12610600  | 1.49346600  | 2.65841500  | H            | 2.54807400  | 2.77230600  | 8.34765800  |

|   |             |            |            |
|---|-------------|------------|------------|
| H | 3.28871800  | 4.12122400 | 7.47882700 |
| C | 0.57045600  | 2.14473300 | 6.53117200 |
| H | 0.18355600  | 1.69712100 | 5.60910400 |
| H | 0.75017200  | 1.32951200 | 7.24684200 |
| H | -0.21804600 | 2.78023100 | 6.95346900 |
| C | 2.95427500  | 1.96173400 | 5.75606100 |
| H | 3.13055000  | 1.16083300 | 6.48843600 |
| H | 2.65624400  | 1.48741200 | 4.81439600 |
| H | 3.91382400  | 2.46595400 | 5.58788400 |
| H | 0.94910000  | 1.25610100 | 2.65564100 |

**TS-2<sub>1h</sub>**

|    |             |             |             |
|----|-------------|-------------|-------------|
| O  | -2.99731300 | -1.64598900 | 0.35335400  |
| C  | -2.09714100 | -1.54984500 | 1.38784900  |
| O  | -1.05988800 | -2.16838200 | 1.40474200  |
| C  | -4.14500200 | -0.80563100 | 0.58905800  |
| H  | -4.22683700 | -0.08766300 | -0.23551500 |
| H  | -5.04280800 | -1.43513500 | 0.58712800  |
| C  | -3.89503400 | -0.14108600 | 1.92055000  |
| C  | -4.68810500 | 0.80664700  | 2.61510500  |
| C  | -4.03972900 | 1.08086100  | 3.73315700  |
| C  | -2.83059100 | 0.71673000  | 4.32023000  |
| C  | -2.90955800 | 1.41162700  | 5.66979600  |
| H  | -3.03295300 | 0.68634600  | 6.48729000  |
| C  | -4.30641400 | 2.01167900  | 5.34052200  |
| H  | -5.15155000 | 1.54141900  | 5.84111700  |
| C  | -4.56623900 | 3.15144600  | 4.59190800  |
| C  | -3.52053300 | 4.06936800  | 4.03343900  |
| H  | -3.63872800 | 4.14740300  | 2.94520700  |
| H  | -3.68401800 | 5.07665300  | 4.44179400  |
| H  | -2.50744100 | 3.75418900  | 4.27436900  |
| C  | -5.96053200 | 3.35800300  | 4.11219000  |
| H  | -6.15078200 | 4.38985200  | 3.80477500  |
| H  | -6.05853900 | 2.69745300  | 3.21698800  |
| H  | -6.71754900 | 3.03896500  | 4.83461400  |
| C  | -2.65295300 | -0.60530700 | 2.38296500  |
| C  | -2.07887500 | -0.21225100 | 3.60589400  |
| O  | -1.90962700 | 2.35082400  | 5.99316400  |
| Si | -0.62571500 | 2.06738400  | 7.06657900  |
| C  | -1.32981500 | 1.65413900  | 8.77224100  |
| H  | -1.95691700 | 2.46407200  | 9.16107900  |

|   |             |             |            |
|---|-------------|-------------|------------|
| H | -1.94086700 | 0.74353700  | 8.74854500 |
| H | -0.52509500 | 1.47730100  | 9.49597800 |
| C | 0.40684000  | 0.61152300  | 6.44988600 |
| H | 1.26226200  | 0.42159700  | 7.10933600 |
| H | -0.18650900 | -0.31071900 | 6.42112800 |
| H | 0.79495200  | 0.78722000  | 5.44048600 |
| C | 0.35672600  | 3.70480200  | 7.07347800 |
| C | 1.55840400  | 3.58285000  | 8.03722500 |
| H | 2.25216200  | 2.78894600  | 7.73464200 |
| H | 2.12870400  | 4.52249800  | 8.05267300 |
| H | 1.24347600  | 3.37912900  | 9.06816700 |
| C | 0.87883000  | 4.01508500  | 5.65397600 |
| H | 0.06028900  | 4.11703900  | 4.93276300 |
| H | 1.44163300  | 4.95957300  | 5.65348400 |
| H | 1.55389800  | 3.23382000  | 5.28475200 |
| C | -0.55067900 | 4.86275500  | 7.54203400 |
| H | 0.00468100  | 5.81158600  | 7.52762000 |
| H | -1.42587700 | 4.97927400  | 6.89325700 |
| H | -0.91028400 | 4.71213200  | 8.56720600 |
| H | -1.12640200 | -0.61608300 | 3.93545800 |

**2h**

|   |             |             |             |
|---|-------------|-------------|-------------|
| O | -3.13331800 | -1.25520300 | -0.25772400 |
| C | -2.08667400 | -1.17508700 | 0.63528500  |
| O | -0.99633900 | -1.63066800 | 0.39802500  |
| C | -4.31448500 | -0.63481500 | 0.27697300  |
| H | -4.62308500 | 0.16741700  | -0.40405500 |
| H | -5.11441800 | -1.38432300 | 0.30965100  |
| C | -3.92013400 | -0.13220400 | 1.64297700  |
| C | -4.66808000 | 0.55287900  | 2.60656300  |
| C | -3.95721200 | 0.87409100  | 3.75836200  |
| C | -2.61713200 | 0.51871600  | 3.95681000  |
| C | -2.58691500 | 1.06829400  | 5.37545500  |
| H | -2.58969300 | 0.26317300  | 6.12545100  |
| C | -4.09833100 | 1.56872300  | 5.11245400  |
| H | -4.80856200 | 1.07822000  | 5.78960900  |
| C | -4.34932200 | 3.05873800  | 5.12705600  |
| C | -3.68126300 | 3.89982600  | 4.06782500  |
| H | -3.89472800 | 4.96281100  | 4.21570400  |
| H | -2.59595600 | 3.75380100  | 4.08214000  |
| H | -4.02663500 | 3.61883700  | 3.06449000  |

|                           |             |             |             |    |             |             |            |
|---------------------------|-------------|-------------|-------------|----|-------------|-------------|------------|
| C                         | -5.14705300 | 3.59369000  | 6.05971100  | C  | -2.84606700 | 0.58856000  | 4.21138700 |
| H                         | -5.33537200 | 4.66352300  | 6.10279500  | C  | -3.03359300 | 1.31379000  | 5.52887700 |
| H                         | -5.71067400 | 0.81963100  | 2.45247800  | H  | -3.16356800 | 0.63343900  | 6.38157300 |
| H                         | -5.64119200 | 2.98334100  | 6.81195400  | C  | -4.38407800 | 1.91883000  | 5.03362000 |
| C                         | -2.57644900 | -0.46630200 | 1.83993100  | H  | -4.29064300 | 2.93675400  | 4.65849800 |
| C                         | -1.86781500 | -0.16103700 | 3.00896800  | C  | -5.65834400 | 1.38737400  | 5.20517000 |
| O                         | -1.61069200 | 2.03014500  | 5.66859400  | C  | -5.94290900 | 0.11712500  | 5.94936900 |
| Si                        | -0.80643800 | 2.17391400  | 7.15207200  | H  | -6.75303500 | 0.29000000  | 6.66952400 |
| C                         | -2.07048700 | 2.40357800  | 8.53757900  | H  | -6.30115800 | -0.65168400 | 5.25109700 |
| H                         | -2.76740700 | 3.21691800  | 8.30853700  | H  | -5.07994000 | -0.27961500 | 6.48705700 |
| H                         | -2.66398700 | 1.49268800  | 8.68496300  | C  | -6.74580600 | 1.91670500  | 4.34504500 |
| H                         | -1.58270100 | 2.62932300  | 9.49361800  | H  | -6.56288800 | 1.45698300  | 3.33762200 |
| C                         | 0.18259200  | 0.59233400  | 7.46541700  | H  | -7.74277200 | 1.62433600  | 4.68529200 |
| H                         | 0.70005600  | 0.63016700  | 8.43162000  | H  | -6.69851500 | 3.00130000  | 4.20963500 |
| H                         | -0.47053800 | -0.28893000 | 7.48564700  | C  | -2.36719700 | -0.52539300 | 2.19563600 |
| H                         | 0.93642400  | 0.42478800  | 6.68792800  | C  | -1.92043400 | -0.14247100 | 3.47474500 |
| C                         | 0.33118300  | 3.69427000  | 6.94693400  | O  | -2.04950200 | 2.27686300  | 5.80499100 |
| C                         | 1.21299200  | 3.85002000  | 8.20585900  | Si | -1.73512400 | 3.01443000  | 7.29493500 |
| H                         | 1.86141300  | 2.98002000  | 8.36581400  | C  | -3.16347000 | 4.17128000  | 7.74214500 |
| H                         | 1.86642300  | 4.72837400  | 8.10510800  | H  | -4.11129600 | 3.62281600  | 7.80994700 |
| H                         | 0.61535700  | 3.99496100  | 9.11474400  | H  | -2.99770200 | 4.65225500  | 8.71372600 |
| C                         | 1.23955100  | 3.51150100  | 5.71168400  | H  | -3.29338300 | 4.96343600  | 6.99618500 |
| H                         | 0.65372700  | 3.39636800  | 4.79334500  | C  | -1.57524700 | 1.69144300  | 8.63654900 |
| H                         | 1.89181700  | 4.38784200  | 5.58606300  | H  | -1.30107800 | 2.14578400  | 9.59629000 |
| H                         | 1.89002600  | 2.63321600  | 5.80625800  | H  | -2.51937500 | 1.15649100  | 8.79695000 |
| C                         | -0.51393100 | 4.97336600  | 6.76447500  | H  | -0.80914200 | 0.94802200  | 8.38985500 |
| H                         | 0.14218300  | 5.84765000  | 6.64349200  | C  | -0.10476400 | 3.96174900  | 7.00189900 |
| H                         | -1.15400200 | 4.91488100  | 5.87732800  | C  | 0.29923800  | 4.72804800  | 8.28051100 |
| H                         | -1.15808000 | 5.16665600  | 7.63080300  | H  | 0.47006200  | 4.05516200  | 9.13021900 |
| H                         | -0.82568600 | -0.44338600 | 3.12511200  | H  | 1.23521300  | 5.27931400  | 8.11215700 |
|                           |             |             |             | H  | -0.45916700 | 5.46222600  | 8.57973000 |
| <b>TS-2<sub>1h'</sub></b> |             |             |             | C  | 1.01621700  | 2.96674900  | 6.62938300 |
| O                         | -2.45177800 | -1.45720300 | 0.08622400  | H  | 0.77108700  | 2.40364100  | 5.72227500 |
| C                         | -1.63560600 | -1.32267700 | 1.18530300  | H  | 1.95640200  | 3.50545500  | 6.44348600 |
| O                         | -0.52812000 | -1.80151600 | 1.23175600  | H  | 1.20934400  | 2.24532900  | 7.43297100 |
| C                         | -3.71336800 | -0.79334500 | 0.29659900  | C  | -0.28660100 | 4.96659200  | 5.84322900 |
| H                         | -3.84519800 | -0.03982600 | -0.48903000 | H  | 0.65507400  | 5.50142700  | 5.65398800 |
| H                         | -4.51715500 | -1.53310500 | 0.20121300  | H  | -0.57656600 | 4.46299400  | 4.91476600 |
| C                         | -3.63022200 | -0.19510000 | 1.67849300  | H  | -1.04898200 | 5.72205900  | 6.07047900 |
| C                         | -4.59623400 | 0.53951300  | 2.40849800  | H  | -0.92796200 | -0.40463000 | 3.82826400 |
| C                         | -4.04767900 | 0.86301800  | 3.56190800  |    |             |             |            |

**2h'**

|    |             |             |             |
|----|-------------|-------------|-------------|
| O  | -2.39251700 | -1.65179500 | 0.05988000  |
| C  | -1.55549900 | -1.44372900 | 1.13508800  |
| O  | -0.44083700 | -1.89933400 | 1.18602700  |
| C  | -3.65793000 | -1.00025800 | 0.25967700  |
| H  | -3.81519700 | -0.28991700 | -0.56087500 |
| H  | -4.44874600 | -1.75870300 | 0.21399100  |
| C  | -3.55697700 | -0.33239200 | 1.60806000  |
| C  | -4.48777400 | 0.44547300  | 2.30589400  |
| C  | -4.03087900 | 0.91440100  | 3.53288800  |
| C  | -2.76527100 | 0.61101100  | 4.04852100  |
| C  | -3.02366400 | 1.33975400  | 5.35898300  |
| H  | -3.16729600 | 0.65140100  | 6.20330700  |
| C  | -4.42589800 | 1.79440300  | 4.72051600  |
| H  | -4.35760200 | 2.85834000  | 4.46790700  |
| C  | -5.70517700 | 1.52251700  | 5.47262400  |
| C  | -6.03138100 | 0.08596400  | 5.80569000  |
| H  | -6.97304700 | 0.01002900  | 6.35712600  |
| H  | -6.11703300 | -0.52238100 | 4.89638700  |
| H  | -5.24604300 | -0.37889500 | 6.41639000  |
| C  | -6.51528800 | 2.52881300  | 5.82511700  |
| H  | -5.47315800 | 0.67243800  | 1.90668600  |
| H  | -7.43577100 | 2.35505800  | 6.37705700  |
| H  | -6.28961300 | 3.56115500  | 5.56968700  |
| C  | -2.28420900 | -0.60881700 | 2.11733700  |
| C  | -1.83261000 | -0.14936800 | 3.36139500  |
| O  | -2.11408600 | 2.35375000  | 5.68309700  |
| Si | -1.86157200 | 3.06261600  | 7.19669800  |
| C  | -3.26813300 | 4.26249900  | 7.58645900  |
| H  | -4.23536500 | 3.74594300  | 7.57598300  |
| H  | -3.14560800 | 4.71565600  | 8.57778100  |
| H  | -3.31912400 | 5.07432200  | 6.85202900  |
| C  | -1.80540100 | 1.71824500  | 8.52647100  |
| H  | -1.55592100 | 2.15052800  | 9.50307600  |
| H  | -2.77426200 | 1.21678100  | 8.63848900  |
| H  | -1.05600900 | 0.95090300  | 8.30213100  |
| C  | -0.18638700 | 3.96128600  | 7.00806000  |
| C  | 0.16779800  | 4.70416500  | 8.31480900  |
| H  | 0.26481000  | 4.01960200  | 9.16686000  |
| H  | 1.13006300  | 5.22495200  | 8.20724300  |
| H  | -0.58232800 | 5.46108100  | 8.57557200  |

|   |             |             |            |
|---|-------------|-------------|------------|
| C | 0.92357800  | 2.93633200  | 6.68994000 |
| H | 0.71345000  | 2.38888500  | 5.76447800 |
| H | 1.88929000  | 3.44676500  | 6.56356200 |
| H | 1.04748800  | 2.20193500  | 7.49552300 |
| C | -0.27080700 | 4.98188800  | 5.85216200 |
| H | 0.69720100  | 5.48624500  | 5.71844000 |
| H | -0.52845800 | 4.49705500  | 4.90424500 |
| H | -1.01837700 | 5.76103500  | 6.04649000 |
| H | -0.83715800 | -0.38951400 | 3.72268400 |

**IN-1e-1**

|    |             |             |             |
|----|-------------|-------------|-------------|
| O  | -1.85927200 | -1.26565600 | -0.54201900 |
| C  | -1.26711900 | -1.27850400 | 0.69664400  |
| O  | -0.22564200 | -1.87163600 | 0.85105600  |
| C  | -3.08061500 | -0.52098300 | -0.53860700 |
| H  | -3.00102300 | 0.29656400  | -1.26513700 |
| H  | -3.90048300 | -1.18012000 | -0.84844500 |
| C  | -3.21535500 | -0.04177000 | 0.87058900  |
| C  | -4.17427700 | 0.71662900  | 1.52901300  |
| C  | -3.95010800 | 0.92345900  | 2.74268600  |
| C  | -2.98953800 | 0.59702400  | 3.67566400  |
| C  | -3.15149400 | 1.05841700  | 5.12697000  |
| H  | -3.02184500 | 0.20203400  | 5.78897900  |
| C  | -4.51793200 | 1.67715800  | 5.28879100  |
| H  | -4.63264500 | 2.62777600  | 4.76721600  |
| C  | -5.56933900 | 1.18563500  | 5.96606600  |
| C  | -5.58151900 | -0.12070300 | 6.72121700  |
| H  | -5.91699700 | 0.03610500  | 7.75502300  |
| H  | -6.29924100 | -0.81607900 | 6.26494900  |
| H  | -4.61009300 | -0.61819700 | 6.75130400  |
| C  | -6.87938900 | 1.93605900  | 5.99209700  |
| H  | -7.68705600 | 1.32686700  | 5.56377500  |
| H  | -7.17797900 | 2.16738200  | 7.02376500  |
| H  | -6.82771800 | 2.87412100  | 5.43139100  |
| C  | -2.12113000 | -0.48788700 | 1.64479200  |
| C  | -1.97017200 | -0.19657600 | 3.04111400  |
| O  | -2.11067300 | 2.02030100  | 5.41858600  |
| Si | -1.92156700 | 2.91596700  | 6.85639000  |
| C  | -3.09472700 | 4.39629800  | 6.86694500  |
| H  | -4.14003800 | 4.07210500  | 6.85557100  |
| H  | -2.94690300 | 5.00690700  | 7.76575000  |

|                            |             |             |             |    |             |             |            |
|----------------------------|-------------|-------------|-------------|----|-------------|-------------|------------|
| H                          | -2.93431900 | 5.04164400  | 5.99553500  | C  | -2.51448500 | 0.90306100  | 5.46072700 |
| C                          | -2.26097800 | 1.80329700  | 8.34521700  | H  | -2.39686600 | 0.01579100  | 6.09335300 |
| H                          | -1.98931000 | 2.30767500  | 9.28069000  | C  | -3.99735900 | 1.37079800  | 5.51425300 |
| H                          | -3.32264000 | 1.53976500  | 8.41293000  | H  | -4.68518800 | 0.69834600  | 6.02553900 |
| H                          | -1.68629100 | 0.87173200  | 8.29073800  | C  | -4.50441500 | 2.58708400  | 5.08130300 |
| C                          | -0.09748100 | 3.50179600  | 6.81071200  | C  | -3.67869400 | 3.72587000  | 4.56015900 |
| C                          | 0.11666900  | 4.58513500  | 7.89268900  | H  | -4.00939000 | 3.98871200  | 3.54733700 |
| H                          | -0.12606100 | 4.22039800  | 8.89927800  | H  | -3.85980400 | 4.60863400  | 5.18930000 |
| H                          | 1.17028100  | 4.89821000  | 7.90920300  | H  | -2.61187100 | 3.51128000  | 4.55447100 |
| H                          | -0.48570000 | 5.48177300  | 7.70603600  | C  | -5.97883100 | 2.69985400  | 4.90498000 |
| C                          | 0.86644700  | 2.32936900  | 7.09943500  | H  | -6.31965700 | 3.73813000  | 4.86784500 |
| H                          | 0.76058900  | 1.50392200  | 6.38689100  | H  | -6.18866700 | 2.22287700  | 3.91779000 |
| H                          | 1.90869600  | 2.67522000  | 7.04289100  | H  | -6.54703300 | 2.14805200  | 5.65946700 |
| H                          | 0.71538900  | 1.91707300  | 8.10424800  | C  | -2.67521900 | -0.35445200 | 1.80806400 |
| C                          | 0.23160600  | 4.10484000  | 5.42794000  | C  | -1.90019000 | -0.13919600 | 2.98699300 |
| H                          | 1.27112400  | 4.46242900  | 5.40603200  | O  | -1.51815400 | 1.85989100  | 5.78251200 |
| H                          | 0.11370000  | 3.36981600  | 4.62463900  | Si | -0.89572600 | 2.09700800  | 7.35555700 |
| H                          | -0.41289300 | 4.96047300  | 5.19050600  | C  | -2.17127600 | 3.05231600  | 8.37232900 |
| C                          | -0.74203400 | -0.71802500 | 3.85031700  | H  | -3.13620500 | 2.53106300  | 8.37923200 |
| C                          | -0.72748300 | -2.25379100 | 3.88817300  | H  | -1.84892200 | 3.15606900  | 9.41513200 |
| H                          | -0.59131500 | -2.68490600 | 2.89791100  | H  | -2.34226400 | 4.05924000  | 7.97439000 |
| H                          | 0.10149900  | -2.56977300 | 4.52979400  | C  | -0.56417900 | 0.41415900  | 8.14386400 |
| H                          | -1.65865300 | -2.62212500 | 4.33115800  | H  | 0.08767500  | 0.51706500  | 9.02010300 |
| C                          | 0.56346900  | -0.12891500 | 3.28109900  | H  | -1.48542300 | -0.07222700 | 8.48595500 |
| H                          | 0.75425200  | -0.45110400 | 2.25793800  | H  | -0.07137300 | -0.25833800 | 7.43278700 |
| H                          | 0.52735600  | 0.96697100  | 3.31237200  | C  | 0.70778100  | 3.10492500  | 7.09879800 |
| H                          | 1.39160100  | -0.46272500 | 3.91509600  | C  | 1.15507300  | 3.69481100  | 8.45644300 |
| O                          | -0.82671700 | -0.35032300 | 5.22623700  | H  | 1.33604300  | 2.91610900  | 9.20869500 |
| H                          | -0.87948700 | 0.62313300  | 5.27899200  | H  | 2.09625500  | 4.24915000  | 8.33412400 |
| <b>TS-2<sub>1e</sub>-1</b> |             |             |             | H  | 0.41680400  | 4.39362300  | 8.86750900 |
| O                          | -3.38337900 | -0.98147900 | -0.31289000 | C  | 1.83953100  | 2.20421400  | 6.55592600 |
| C                          | -2.28993000 | -0.98094300 | 0.51068200  | H  | 1.57915900  | 1.71764500  | 5.60959800 |
| O                          | -1.23661300 | -1.44554400 | 0.13307100  | H  | 2.74433200  | 2.80300400  | 6.37911000 |
| C                          | -4.51483000 | -0.37883600 | 0.33237700  | H  | 2.10546100  | 1.41283800  | 7.26621400 |
| H                          | -4.84692700 | 0.47778600  | -0.26599500 | C  | 0.46044900  | 4.26287000  | 6.10762400 |
| H                          | -5.33085400 | -1.11063600 | 0.36669200  | H  | 1.37148700  | 4.86812700  | 5.99720500 |
| C                          | -4.03195100 | 0.02013500  | 1.69945300  | H  | 0.18476100  | 3.89379500  | 5.11391400 |
| C                          | -4.77638400 | 0.69074800  | 2.70026200  | H  | -0.33687400 | 4.93544000  | 6.44869500 |
| C                          | -3.94745300 | 0.82262600  | 3.71575200  | C  | -0.42859500 | -0.53466300 | 3.19926500 |
| C                          | -2.61979300 | 0.51727900  | 3.99498800  | C  | -0.23376000 | -2.05270600 | 3.10058800 |
|                            |             |             |             | H  | -0.45799100 | -2.40928500 | 2.09479800 |



|   |             |             |            |
|---|-------------|-------------|------------|
| H | 0.80755200  | -2.29103100 | 3.34170000 |
| H | -0.87801700 | -2.56153800 | 3.82501600 |
| C | 0.49090400  | 0.22172500  | 2.22479700 |
| H | 0.27903900  | -0.04741500 | 1.18847600 |
| H | 0.36455900  | 1.30531900  | 2.34373800 |
| H | 1.53166800  | -0.03048900 | 2.45437700 |
| O | -0.04382400 | -0.21032700 | 4.54582900 |
| H | -0.20471200 | 0.73796700  | 4.69304600 |

**TS-2<sub>1e</sub>'-1**

|    |             |             |             |
|----|-------------|-------------|-------------|
| O  | -2.75457200 | -1.49711500 | -0.14556500 |
| C  | -1.86211400 | -1.43217200 | 0.89161300  |
| O  | -0.77808500 | -1.96502900 | 0.80113900  |
| C  | -3.96662200 | -0.79875900 | 0.17265600  |
| H  | -4.12628600 | -0.01280100 | -0.57521400 |
| H  | -4.80523400 | -1.50300100 | 0.11495900  |
| C  | -3.76149700 | -0.25429700 | 1.55861600  |
| C  | -4.68118600 | 0.49112200  | 2.33332300  |
| C  | -4.06372800 | 0.77342200  | 3.45542600  |
| C  | -2.84662200 | 0.45830000  | 4.04961900  |
| C  | -2.97308400 | 1.15584200  | 5.39386900  |
| H  | -3.06401600 | 0.45392100  | 6.22978300  |
| C  | -4.32203200 | 1.80835400  | 4.98848300  |
| H  | -4.22348200 | 2.82889500  | 4.62271600  |
| C  | -5.59474300 | 1.29916600  | 5.20058900  |
| C  | -5.87347000 | 0.01154000  | 5.91681900  |
| H  | -6.65109400 | 0.17525400  | 6.67387000  |
| H  | -6.27359300 | -0.72764400 | 5.20927200  |
| H  | -4.99731600 | -0.41790300 | 6.40575000  |
| C  | -6.71383700 | 1.88296600  | 4.41683100  |
| H  | -6.60918000 | 1.44190800  | 3.39286900  |
| H  | -7.69777100 | 1.61535100  | 4.81133700  |
| H  | -6.63871500 | 2.96848000  | 4.30360200  |
| C  | -2.47749300 | -0.64248000 | 1.99671300  |
| C  | -1.95293200 | -0.29901600 | 3.28027900  |
| O  | -1.95880800 | 2.10983800  | 5.66209900  |
| Si | -1.67994000 | 2.82969500  | 7.18195100  |
| C  | -3.05461900 | 4.08094300  | 7.52563800  |
| H  | -4.04199600 | 3.60563900  | 7.48061400  |
| H  | -2.95047700 | 4.52045300  | 8.52468500  |
| H  | -3.04808800 | 4.90069900  | 6.79807300  |

|   |             |             |            |
|---|-------------|-------------|------------|
| C | -1.68531700 | 1.48187900  | 8.50483000 |
| H | -1.30238000 | 1.86651400  | 9.45796900 |
| H | -2.69408900 | 1.09701400  | 8.69692500 |
| H | -1.05508800 | 0.63672800  | 8.20589100 |
| C | 0.02586800  | 3.67276700  | 7.00957400 |
| C | 0.24098700  | 4.63718200  | 8.19794900 |
| H | 0.20056100  | 4.11960600  | 9.16509300 |
| H | 1.23105900  | 5.10895900  | 8.12640200 |
| H | -0.50300300 | 5.44235800  | 8.21589600 |
| C | 1.15516600  | 2.61782400  | 7.01812400 |
| H | 1.05070400  | 1.87571700  | 6.21870900 |
| H | 2.12955100  | 3.10870100  | 6.88338800 |
| H | 1.19449100  | 2.07167300  | 7.96810600 |
| C | 0.08747400  | 4.47549900  | 5.69185000 |
| H | 1.06114200  | 4.97732700  | 5.59927600 |
| H | -0.04114100 | 3.83018600  | 4.81661600 |
| H | -0.68523600 | 5.25336500  | 5.64840800 |
| C | -0.56350300 | -0.67039300 | 3.83018700 |
| C | -0.40128900 | -2.19078500 | 3.95362300 |
| H | -0.43745100 | -2.66946200 | 2.97464400 |
| H | 0.56567600  | -2.40362200 | 4.42165500 |
| H | -1.18879400 | -2.59967100 | 4.59510800 |
| C | 0.55311800  | -0.04586900 | 2.97555300 |
| H | 0.54615100  | -0.44296100 | 1.95877000 |
| H | 0.43679500  | 1.04439400  | 2.93234300 |
| H | 1.51919000  | -0.27055800 | 3.43999200 |
| O | -0.44592400 | -0.18751500 | 5.17720900 |
| H | -0.59436200 | 0.77505300  | 5.17222600 |

**2e-1**

|   |             |             |             |
|---|-------------|-------------|-------------|
| O | -3.27474600 | -1.13341100 | -0.33820300 |
| C | -2.19268500 | -1.09393200 | 0.50599300  |
| O | -1.12127600 | -1.52578100 | 0.15001000  |
| C | -4.43125200 | -0.55963600 | 0.27926600  |
| H | -4.77925600 | 0.27604100  | -0.34001100 |
| H | -5.22350900 | -1.31767500 | 0.30921300  |
| C | -3.97705900 | -0.13095100 | 1.64673100  |
| C | -4.72490100 | 0.50500700  | 2.63920000  |
| C | -4.00033600 | 0.78741400  | 3.78662200  |
| C | -2.65767000 | 0.43075600  | 3.95059200  |
| C | -2.63095400 | 0.91602800  | 5.39886700  |

|    |             |             |            |              |             |             |             |
|----|-------------|-------------|------------|--------------|-------------|-------------|-------------|
| H  | -2.63074900 | 0.07430900  | 6.10286800 | H            | -0.76972200 | -2.57477700 | 3.84143000  |
| C  | -4.13417700 | 1.43581100  | 5.16009700 | C            | 0.49741100  | 0.26911400  | 2.26050500  |
| H  | -4.84566500 | 0.92741900  | 5.82259600 | H            | 0.32128900  | -0.01147400 | 1.22028300  |
| C  | -4.40061400 | 2.92357400  | 5.20079200 | H            | 0.31754300  | 1.34535000  | 2.37446100  |
| C  | -3.67830200 | 3.80363400  | 4.21031600 | H            | 1.54400900  | 0.06798100  | 2.51157400  |
| H  | -3.92819000 | 4.85751800  | 4.36577100 | O            | -0.06206200 | -0.18567400 | 4.57177900  |
| H  | -2.59348800 | 3.68417500  | 4.29877400 | H            | -0.31035800 | 0.74175800  | 4.73590300  |
| H  | -3.94506300 | 3.53884100  | 3.17906600 |              |             |             |             |
| C  | -5.27503000 | 3.42151000  | 6.08355000 | <b>2e'-1</b> |             |             |             |
| H  | -5.48785300 | 4.48629700  | 6.13637400 | O            | -2.72124200 | -1.71826700 | -0.13347200 |
| H  | -5.77119300 | 0.76596500  | 2.50344800 | C            | -1.81243300 | -1.59170900 | 0.88815700  |
| H  | -5.80912600 | 2.78535000  | 6.78536200 | O            | -0.72534700 | -2.11445600 | 0.81056600  |
| C  | -2.61980400 | -0.46435700 | 1.78945100 | C            | -3.93142000 | -1.01439600 | 0.16357800  |
| C  | -1.88393500 | -0.20515000 | 2.97712100 | H            | -4.10430400 | -0.27006100 | -0.62320700 |
| O  | -1.63189400 | 1.85066400  | 5.74922400 | H            | -4.76356500 | -1.72893300 | 0.14887500  |
| Si | -1.02311800 | 2.06522900  | 7.33120000 | C            | -3.70904900 | -0.39961300 | 1.51763500  |
| C  | -2.30766300 | 2.94942900  | 8.39444700 | C            | -4.58435400 | 0.40719000  | 2.24809400  |
| H  | -3.25386800 | 2.39683300  | 8.40603600 | C            | -4.06446100 | 0.83291400  | 3.46034800  |
| H  | -1.96200500 | 3.03665600  | 9.43169500 | C            | -2.80292600 | 0.45060400  | 3.92587300  |
| H  | -2.52677200 | 3.95595800  | 8.02270300 | C            | -2.99132100 | 1.16977500  | 5.25671000  |
| C  | -0.63535700 | 0.36902300  | 8.06618400 | H            | -3.12965300 | 0.47665000  | 6.09419400  |
| H  | 0.01120600  | 0.46569100  | 8.94716300 | C            | -4.37927600 | 1.70914300  | 4.67159100  |
| H  | -1.54201500 | -0.15546000 | 8.39071200 | H            | -4.26942700 | 2.77259000  | 4.43200900  |
| H  | -0.12256900 | -0.26569900 | 7.33500100 | C            | -5.65605000 | 1.48376300  | 5.44470100  |
| C  | 0.55309300  | 3.12525700  | 7.10379300 | C            | -6.01420700 | 0.06280900  | 5.81029800  |
| C  | 0.98689000  | 3.68490100  | 8.47850700 | H            | -6.95978700 | 0.02061900  | 6.35858600  |
| H  | 1.19224000  | 2.88819000  | 9.20528300 | H            | -6.10905500 | -0.56505000 | 4.91528300  |
| H  | 1.91164100  | 4.26968900  | 8.37194100 | H            | -5.24218800 | -0.40353100 | 6.43622400  |
| H  | 0.23010100  | 4.34855400  | 8.91296500 | C            | -6.44236800 | 2.51564400  | 5.77653700  |
| C  | 1.71116900  | 2.27718100  | 6.53294200 | H            | -5.56821300 | 0.68371300  | 1.87832600  |
| H  | 1.46551800  | 1.81533600  | 5.57058400 | H            | -7.36529100 | 2.37479900  | 6.33367800  |
| H  | 2.59839500  | 2.90782100  | 6.37754100 | H            | -6.19460900 | 3.53691900  | 5.49796200  |
| H  | 2.00017300  | 1.46999800  | 7.21616800 | C            | -2.42456400 | -0.75625800 | 1.96141400  |
| C  | 0.27146400  | 4.30671800  | 6.15049400 | C            | -1.90170500 | -0.34409200 | 3.21696100  |
| H  | 1.16498200  | 4.94091600  | 6.05842800 | O            | -2.01381000 | 2.14165300  | 5.56975200  |
| H  | 0.00357100  | 3.96124900  | 5.14622800 | Si           | -1.78234400 | 2.83981600  | 7.10613500  |
| H  | -0.54489600 | 4.94403100  | 6.51304700 | C            | -3.15628500 | 4.09370500  | 7.42852900  |
| C  | -0.40193400 | -0.52915100 | 3.22232100 | H            | -4.14127900 | 3.61955400  | 7.34677300  |
| C  | -0.13167300 | -2.03726300 | 3.13247300 | H            | -3.07712100 | 4.52042200  | 8.43553400  |
| H  | -0.30656600 | -2.40983300 | 2.12291600 | H            | -3.12521900 | 4.92215500  | 6.71121800  |
| H  | 0.91236100  | -2.22072500 | 3.40652400 | C            | -1.82999500 | 1.47342300  | 8.40952000  |

|           |             |             |             |    |             |             |             |
|-----------|-------------|-------------|-------------|----|-------------|-------------|-------------|
| H         | -1.46764200 | 1.84169100  | 9.37711500  | H  | -3.90008200 | 2.62381600  | 6.25588000  |
| H         | -2.84716100 | 1.09664600  | 8.56950800  | C  | -3.98236100 | 1.01857000  | 7.60802300  |
| H         | -1.19983000 | 0.62669700  | 8.11465300  | C  | -3.35930400 | -0.14606300 | 8.33895100  |
| C         | -0.06663000 | 3.67861500  | 7.00230100  | H  | -3.52218600 | -0.05261100 | 9.42105300  |
| C         | 0.11072900  | 4.62724400  | 8.20941400  | H  | -3.83568800 | -1.08786000 | 8.03386900  |
| H         | 0.03553400  | 4.09704600  | 9.16762100  | H  | -2.28518600 | -0.25160900 | 8.16794100  |
| H         | 1.10403600  | 5.09708100  | 8.17833500  | C  | -5.44703700 | 1.23158400  | 7.90930400  |
| H         | -0.63180700 | 5.43385600  | 8.21272300  | H  | -6.03467300 | 0.33904000  | 7.65307800  |
| C         | 1.06116800  | 2.62298500  | 7.03562900  | H  | -5.60508400 | 1.41143200  | 8.98167600  |
| H         | 0.98627800  | 1.89351600  | 6.22155300  | H  | -5.85928300 | 2.08056000  | 7.35616500  |
| H         | 2.04041000  | 3.11501200  | 6.94559700  | C  | -0.44882500 | -2.86009300 | 0.64053400  |
| H         | 1.06448800  | 2.06147700  | 7.97751300  | C  | -1.12379900 | -3.66170800 | 1.25129500  |
| C         | 0.04127900  | 4.49901300  | 5.69863300  | O  | -1.30413400 | 3.06694700  | 6.43971000  |
| H         | 1.01969300  | 4.99761700  | 5.64344200  | Si | -0.35036100 | 3.62906000  | 7.71425600  |
| H         | -0.06264400 | 3.86608100  | 4.81102100  | C  | -1.42273600 | 3.96832000  | 9.23365100  |
| H         | -0.72667200 | 5.28069600  | 5.64100600  | H  | -1.94616600 | 3.05779400  | 9.54845600  |
| C         | -0.51340300 | -0.67447300 | 3.78873600  | H  | -0.82090400 | 4.31463600  | 10.08277600 |
| C         | -0.32833100 | -2.18629500 | 3.97618700  | H  | -2.18470300 | 4.72827700  | 9.02846800  |
| H         | -0.34605000 | -2.70761000 | 3.01869500  | C  | 0.94885900  | 2.32696500  | 8.16020200  |
| H         | 0.63690300  | -2.36208100 | 4.46225900  | H  | 1.62805300  | 2.70809800  | 8.93241000  |
| H         | -1.11480100 | -2.58100000 | 4.62761200  | H  | 0.49383800  | 1.41330000  | 8.56232500  |
| C         | 0.59635000  | -0.06968000 | 2.90931000  | H  | 1.55535300  | 2.04215300  | 7.29333800  |
| H         | 0.59851600  | -0.50644700 | 1.90860700  | C  | 0.43916500  | 5.22435400  | 7.02120400  |
| H         | 0.46664800  | 1.01630900  | 2.82346600  | C  | 1.33063600  | 5.88597500  | 8.09489300  |
| H         | 1.56374100  | -0.26273900 | 3.38452300  | H  | 2.15390400  | 5.23229500  | 8.40974200  |
| O         | -0.40934200 | -0.13507800 | 5.11266500  | H  | 1.78268800  | 6.80662300  | 7.69870300  |
| H         | -0.61256800 | 0.81761000  | 5.08412100  | H  | 0.76198000  | 6.16475500  | 8.99086900  |
| <b>1g</b> |             |             |             | C  | 1.29862600  | 4.88621500  | 5.78409200  |
| O         | -0.04989400 | -0.73666400 | -0.40876800 | H  | 0.70353600  | 4.40867700  | 4.99823900  |
| C         | 0.44079200  | -1.96161800 | -0.06450300 | H  | 1.73695600  | 5.80262000  | 5.36309300  |
| O         | 1.57516000  | -2.25062700 | -0.36414800 | H  | 2.12892900  | 4.21357800  | 6.03270800  |
| C         | -1.39418200 | -0.36258400 | -0.03886800 | C  | -0.67110000 | 6.21352200  | 6.60447400  |
| H         | -1.64837000 | 0.44105800  | -0.73678800 | H  | -0.22854500 | 7.12780400  | 6.18294600  |
| H         | -2.07846800 | -1.20008400 | -0.21703400 | H  | -1.33075800 | 5.78029600  | 5.84494800  |
| C         | -1.50332200 | 0.10279200  | 1.33910500  | H  | -1.29190100 | 6.51648300  | 7.45677500  |
| C         | -1.58885400 | 0.49669000  | 2.48649400  | C  | -1.93756900 | -4.62392800 | 2.00971600  |
| C         | -1.69062400 | 0.93741800  | 3.77472400  | C  | -1.66373500 | -4.41258000 | 3.51923200  |
| C         | -1.78049600 | 1.32729600  | 4.92360100  | H  | -1.92421400 | -3.39509600 | 3.82754700  |
| C         | -1.89344500 | 1.77223800  | 6.32156000  | H  | -2.26637600 | -5.11795800 | 4.10311800  |
| H         | -1.34531200 | 1.04750800  | 6.93902900  | H  | -0.60830900 | -4.58222300 | 3.75449100  |
| C         | -3.34696100 | 1.82175700  | 6.74156500  | C  | -3.43528800 | -4.37877300 | 1.70988000  |

|   |             |             |            |
|---|-------------|-------------|------------|
| H | -3.73200200 | -3.36372400 | 1.99351800 |
| H | -3.65128800 | -4.51587500 | 0.64508200 |
| H | -4.04795100 | -5.08837800 | 2.27778500 |
| C | -1.54417500 | -6.06248700 | 1.59956300 |
| H | -2.14137300 | -6.78510200 | 2.16770300 |
| H | -1.72349900 | -6.23072400 | 0.53272100 |
| H | -0.48550500 | -6.25267900 | 1.80181400 |

**TS-1<sub>1g</sub>**

|   |             |             |             |
|---|-------------|-------------|-------------|
| O | -2.83019900 | -0.62642200 | -0.25953200 |
| C | -4.10690400 | -0.84550100 | 0.12124300  |
| O | -5.04898700 | -0.49945200 | -0.54009400 |
| C | -1.85686100 | -1.10177300 | 0.67419100  |
| H | -1.19695500 | -1.79715000 | 0.14597300  |
| H | -1.26792400 | -0.24308300 | 1.01430300  |
| C | -2.57171100 | -1.77837500 | 1.81946700  |
| C | -2.11455100 | -2.38436900 | 2.86198100  |
| C | -2.62845900 | -2.99406300 | 3.95086000  |
| C | -3.11565600 | -3.54675400 | 4.93580700  |
| C | -3.69805600 | -4.20744400 | 6.11321900  |
| H | -4.58489400 | -4.76362400 | 5.77045700  |
| C | -4.18873800 | -3.20551400 | 7.15171500  |
| H | -5.26299300 | -3.22115800 | 7.32697200  |
| C | -3.43410800 | -2.35333600 | 7.86151800  |
| C | -1.93793700 | -2.22945400 | 7.73049500  |
| H | -1.66277500 | -1.20138900 | 7.45791100  |
| H | -1.45549200 | -2.43731700 | 8.69547800  |
| H | -1.51954800 | -2.91026400 | 6.98926400  |
| C | -4.06704400 | -1.43758800 | 8.88041200  |
| H | -3.65457600 | -1.62198200 | 9.88193300  |
| H | -3.85410000 | -0.38553000 | 8.64543600  |
| H | -5.15300000 | -1.56362300 | 8.93105500  |
| C | -4.16009100 | -1.56413300 | 1.45702500  |
| C | -5.20067600 | -1.88704500 | 2.10022800  |
| C | -6.47229600 | -2.21208700 | 2.72847800  |
| C | -7.60803000 | -1.73989700 | 1.76786500  |
| H | -7.53903500 | -2.24265800 | 0.79925800  |
| H | -8.57897300 | -1.97626900 | 2.22007900  |
| H | -7.55280000 | -0.66176600 | 1.59511700  |
| C | -6.58225400 | -3.74283000 | 2.94173000  |
| H | -5.77366900 | -4.09976600 | 3.58675800  |

|    |             |             |            |
|----|-------------|-------------|------------|
| H  | -7.54446900 | -3.97899200 | 3.41044900 |
| H  | -6.52274700 | -4.27724100 | 1.98827800 |
| O  | -2.77075300 | -5.12687500 | 6.70519500 |
| Si | -2.57517400 | -6.74391200 | 6.25385800 |
| C  | -4.20310600 | -7.66479000 | 6.54952600 |
| H  | -5.00337600 | -7.28216800 | 5.90338600 |
| H  | -4.09890500 | -8.73394500 | 6.32815800 |
| H  | -4.54168600 | -7.56785900 | 7.58708400 |
| C  | -2.12022700 | -6.88830600 | 4.42552100 |
| H  | -2.90652800 | -6.47066300 | 3.78591300 |
| H  | -1.19516000 | -6.35037300 | 4.19273000 |
| H  | -1.98591600 | -7.93783800 | 4.13582500 |
| C  | -1.17974800 | -7.37802500 | 7.39549200 |
| C  | -0.92476800 | -8.87798600 | 7.13080500 |
| H  | -0.62497000 | -9.07000600 | 6.09297100 |
| H  | -0.11359500 | -9.24549900 | 7.77575400 |
| H  | -1.80978500 | -9.49079300 | 7.34317400 |
| C  | 0.11889700  | -6.58808100 | 7.12442400 |
| H  | -0.01812100 | -5.51469700 | 7.29561400 |
| H  | 0.92123100  | -6.93348300 | 7.79272300 |
| H  | 0.47300100  | -6.72139200 | 6.09495200 |
| C  | -1.58405200 | -7.18498600 | 8.87305800 |
| H  | -0.78012300 | -7.53462900 | 9.53719200 |
| H  | -1.77534900 | -6.13130600 | 9.10305500 |
| H  | -2.48694300 | -7.75334100 | 9.12858200 |
| C  | -6.60252900 | -1.47282600 | 4.08379700 |
| H  | -5.78614700 | -1.74698000 | 4.75816300 |
| H  | -6.58287800 | -0.38755700 | 3.94184300 |
| H  | -7.55588600 | -1.74139400 | 4.55350700 |

**IN-1<sub>g</sub>**

|   |             |             |             |
|---|-------------|-------------|-------------|
| O | -1.56846400 | -0.41616300 | -0.77204300 |
| C | -1.01131600 | -0.65907100 | 0.45912600  |
| O | 0.06058900  | -1.21480300 | 0.51476700  |
| C | -2.80712000 | 0.28598500  | -0.66264000 |
| H | -2.73183700 | 1.23097100  | -1.21398000 |
| H | -3.60300900 | -0.31641800 | -1.11762300 |
| C | -2.98998200 | 0.47958300  | 0.80678900  |
| C | -3.97879200 | 1.12648800  | 1.54211200  |
| C | -3.76651500 | 1.11926900  | 2.77458700  |
| C | -2.84234500 | 0.64113800  | 3.67719800  |

|    |             |             |            |                          |             |             |             |
|----|-------------|-------------|------------|--------------------------|-------------|-------------|-------------|
| C  | -3.03203200 | 1.01150300  | 5.15380300 | H                        | 0.88094900  | -0.14960800 | 2.26166500  |
| H  | -2.85922200 | 0.15108100  | 5.79643200 | C                        | -0.74549600 | -0.89616500 | 5.21634500  |
| C  | -4.44856000 | 1.50794300  | 5.34180000 | H                        | -0.72718100 | 0.09507900  | 5.67034300  |
| H  | -4.63404200 | 2.47842500  | 4.88075300 | H                        | -1.62551700 | -1.44761900 | 5.56554200  |
| C  | -5.46100000 | 0.89936100  | 5.98174500 | H                        | 0.13226300  | -1.44123500 | 5.58008700  |
| C  | -5.37803900 | -0.44673100 | 6.65947100 | C                        | -0.66187100 | -0.84973000 | 3.67642500  |
| H  | -5.72953800 | -0.37737000 | 7.69751500 | C                        | -0.67314300 | -2.33688000 | 3.23224300  |
| H  | -6.03811400 | -1.16651600 | 6.15629700 | H                        | -0.50476700 | -2.46572900 | 2.16616500  |
| H  | -4.37232700 | -0.87276000 | 6.67090300 | H                        | 0.12616200  | -2.87177600 | 3.75900200  |
| C  | -6.82449800 | 1.54562500  | 6.04423700 | H                        | -1.62480800 | -2.80765800 | 3.50750600  |
| H  | -7.58448300 | 0.90045700  | 5.58248800 |                          |             |             |             |
| H  | -7.13819800 | 1.69942600  | 7.08594800 | <b>TS-2<sub>1g</sub></b> |             |             |             |
| H  | -6.84472900 | 2.51289300  | 5.53348200 | O                        | -3.74606600 | -0.37928200 | -0.38048900 |
| C  | -1.92657800 | -0.11272900 | 1.52294300 | C                        | -2.55721000 | -0.62181400 | 0.25500000  |
| C  | -1.82287000 | -0.08904700 | 2.96442600 | O                        | -1.65444500 | -1.15694300 | -0.34974100 |
| O  | -2.07881400 | 2.03383600  | 5.46787400 | C                        | -4.66580300 | 0.29380300  | 0.48522800  |
| Si | -1.93463300 | 2.93058400  | 6.89516800 | H                        | -4.94906300 | 1.24909300  | 0.02742600  |
| C  | -3.27815100 | 4.25745800  | 7.01075700 | H                        | -5.57001700 | -0.31820500 | 0.59000000  |
| H  | -4.27061100 | 3.80832400  | 7.11988600 | C                        | -3.93220000 | 0.46908700  | 1.78329200  |
| H  | -3.11219400 | 4.90742000  | 7.87859300 | C                        | -4.42080900 | 1.12999600  | 2.93499200  |
| H  | -3.29570400 | 4.89321500  | 6.11806500 | C                        | -3.43030800 | 1.07267900  | 3.78719500  |
| C  | -2.06982300 | 1.78438200  | 8.39465600 | C                        | -2.13266800 | 0.57707700  | 3.86765400  |
| H  | -1.90754800 | 2.33796600  | 9.32753000 | C                        | -1.75030900 | 0.88630600  | 5.31996900  |
| H  | -3.06750200 | 1.33369600  | 8.45618000 | H                        | -1.60169400 | -0.03287500 | 5.90049500  |
| H  | -1.33671100 | 0.97053900  | 8.36028500 | C                        | -3.13758600 | 1.47388600  | 5.67412000  |
| C  | -0.20551500 | 3.74422300  | 6.76713600 | H                        | -3.80091600 | 0.80855900  | 6.22490400  |
| C  | 0.00796500  | 4.70453600  | 7.95842600 | C                        | -3.59975400 | 2.74234300  | 5.39703400  |
| H  | -0.04519600 | 4.18547500  | 8.92395100 | C                        | -2.79216200 | 3.84720900  | 4.77887500  |
| H  | 1.00222000  | 5.16957500  | 7.89602900 | H                        | -3.30099900 | 4.21002900  | 3.87702200  |
| H  | -0.72904100 | 5.51614000  | 7.97258900 | H                        | -2.74733000 | 4.69262100  | 5.47945500  |
| C  | 0.90444800  | 2.67227100  | 6.79107800 | H                        | -1.77818900 | 3.54261200  | 4.52856400  |
| H  | 0.81704900  | 1.97616300  | 5.94993000 | C                        | -5.06581400 | 2.99676000  | 5.52026500  |
| H  | 1.89391400  | 3.14743200  | 6.72299700 | H                        | -5.29465000 | 4.05739200  | 5.65916700  |
| H  | 0.88996600  | 2.08468500  | 7.71750000 | H                        | -5.50359100 | 2.66834300  | 4.55212800  |
| C  | -0.10150700 | 4.54280900  | 5.44950900 | H                        | -5.53905100 | 2.41020200  | 6.31300600  |
| H  | 0.89113100  | 5.00827900  | 5.36303200 | C                        | -2.65130000 | -0.11113700 | 1.66036300  |
| H  | -0.24700600 | 3.89849900  | 4.57579600 | C                        | -1.68868500 | -0.13005600 | 2.72790900  |
| H  | -0.84399900 | 5.34889600  | 5.39860000 | O                        | -0.65446800 | 1.76044800  | 5.50709500  |
| C  | 0.68015000  | -0.15612300 | 3.33178700 | Si                       | 0.17578100  | 1.97606900  | 6.97291700  |
| H  | 0.67788500  | 0.87465500  | 3.70424000 | C                        | -0.99419600 | 2.68145100  | 8.28240000  |
| H  | 1.50205300  | -0.69158000 | 3.82259700 | H                        | -1.80103200 | 1.97721200  | 8.51853200  |

|           |              |             |             |    |             |             |            |
|-----------|--------------|-------------|-------------|----|-------------|-------------|------------|
| H         | -0.45735500  | 2.88131400  | 9.21790500  | C  | -4.55816600 | 0.59097100  | 3.06027000 |
| H         | -1.45907200  | 3.61928200  | 7.95926300  | C  | -3.58287200 | 0.73729900  | 4.03003100 |
| C         | 0.83342800   | 0.31471900  | 7.59138200  | C  | -2.23051400 | 0.41957400  | 3.83780600 |
| H         | 1.32239200   | 0.43529100  | 8.56554600  | C  | -1.90126500 | 0.73845300  | 5.31548300 |
| H         | 0.02697100   | -0.41559900 | 7.72907000  | H  | -1.72030200 | -0.17978300 | 5.89256300 |
| H         | 1.56194800   | -0.12572300 | 6.90239700  | C  | -3.43353500 | 1.18557100  | 5.47112700 |
| C         | 1.59070700   | 3.19215300  | 6.55234300  | H  | -3.96828800 | 0.55379400  | 6.19139200 |
| C         | 2.50504500   | 3.35743100  | 7.78700300  | C  | -3.73554400 | 2.63788200  | 5.76694700 |
| H         | 2.97381800   | 2.41118800  | 8.08276700  | C  | -3.30343300 | 3.67044000  | 4.75450200 |
| H         | 3.31602600   | 4.06554800  | 7.56521300  | H  | -3.51266600 | 4.68365000  | 5.11096400 |
| H         | 1.96287900   | 3.75035100  | 8.65627700  | H  | -2.23305900 | 3.58488600  | 4.54121300 |
| C         | 2.42713000   | 2.64889100  | 5.37375500  | H  | -3.82870900 | 3.52986000  | 3.80102300 |
| H         | 1.82099100   | 2.53341500  | 4.46890000  | C  | -4.40111300 | 2.97365600  | 6.87898000 |
| H         | 3.24818300   | 3.34183100  | 5.14040100  | H  | -4.63852700 | 4.00917600  | 7.11026900 |
| H         | 2.87834300   | 1.67562500  | 5.60228800  | H  | -5.60790600 | 0.82445600  | 3.21760100 |
| C         | 1.01804200   | 4.57185500  | 6.16278200  | H  | -4.73435800 | 2.22781200  | 7.59667000 |
| H         | 1.83441700   | 5.26726100  | 5.92047600  | C  | -2.71250600 | -0.17509800 | 1.61610100 |
| H         | 0.37013400   | 4.50777300  | 5.28148800  | C  | -1.71180200 | -0.08863200 | 2.63458700 |
| H         | 0.43816700   | 5.02319700  | 6.97712600  | O  | -0.92325100 | 1.70585300  | 5.59954600 |
| C         | 0.57614500   | -0.16062900 | 1.60461900  | Si | -0.04306300 | 1.81014400  | 7.04757200 |
| H         | 0.76595100   | 0.87903100  | 1.89769700  | C  | -1.20805400 | 1.88341800  | 8.53371300 |
| H         | 1.54261100   | -0.67764400 | 1.55429800  | H  | -1.77364800 | 0.94878500  | 8.63615100 |
| H         | 0.13281000   | -0.17664300 | 0.60871500  | H  | -0.64258000 | 2.02081200  | 9.46389900 |
| C         | 0.41442100   | -0.84829800 | 3.99269600  | H  | -1.93307200 | 2.69821100  | 8.44828900 |
| H         | 0.62155900   | 0.16590900  | 4.33813700  | C  | 1.05505600  | 0.28203400  | 7.24299500 |
| H         | -0.14289700  | -1.38004600 | 4.77282300  | H  | 1.56138800  | 0.29626800  | 8.21586200 |
| H         | 1.37203200   | -1.36678100 | 3.87072100  | H  | 0.46772100  | -0.64315000 | 7.20043500 |
| C         | -0.33145400  | -0.86073600 | 2.64499000  | H  | 1.82290600  | 0.21953500  | 6.46494200 |
| C         | -0.54764300  | -2.34856000 | 2.27231200  | C  | 1.00072500  | 3.40267800  | 6.87025500 |
| H         | -0.98912900  | -2.46569300 | 1.28385200  | C  | 2.01465700  | 3.47909500  | 8.03459000 |
| H         | 0.42023200   | -2.86482900 | 2.27320500  | H  | 2.72362700  | 2.64256900  | 8.02146200 |
| H         | -1.18909100  | -2.84209400 | 3.01281400  | H  | 2.60302100  | 4.40509500  | 7.96379300 |
|           |              |             |             | H  | 1.52065800  | 3.48514400  | 9.01461900 |
|           |              |             |             | C  | 1.77007700  | 3.39055800  | 5.53187300 |
|           |              |             |             | H  | 1.08810100  | 3.36276100  | 4.67531800 |
|           |              |             |             | H  | 2.38741600  | 4.29597300  | 5.43964100 |
|           |              |             |             | H  | 2.44400500  | 2.52865800  | 5.45165700 |
|           |              |             |             | C  | 0.09492300  | 4.65190700  | 6.91599400 |
|           |              |             |             | H  | 0.69988900  | 5.56326200  | 6.80231300 |
|           |              |             |             | H  | -0.64753300 | 4.64660700  | 6.11057200 |
|           |              |             |             | H  | -0.44312300 | 4.73439100  | 7.86786000 |
| <b>2g</b> |              |             |             |    |             |             |            |
| O         | -3.86270600  | -0.49669100 | -0.38840700 |    |             |             |            |
| C         | -2.61025000  | -0.56066200 | 0.17165900  |    |             |             |            |
| O         | -1.66h516100 | -0.87646400 | -0.51251900 |    |             |             |            |
| C         | -4.83443700  | -0.07629000 | 0.56928400  |    |             |             |            |
| H         | -5.31937500  | 0.83565400  | 0.19987900  |    |             |             |            |
| H         | -5.59937600  | -0.85740800 | 0.66205900  |    |             |             |            |
| C         | -4.06327300  | 0.14099700  | 1.83869500  |    |             |             |            |

|                           |             |             |             |            |             |             |             |
|---------------------------|-------------|-------------|-------------|------------|-------------|-------------|-------------|
| C                         | 0.44903600  | 0.41150700  | 1.41914100  | Si         | -1.62286700 | 2.76019500  | 7.24646100  |
| H                         | 0.43150500  | 1.44964800  | 1.77175100  | C          | -3.21716100 | 3.59906700  | 7.83001500  |
| H                         | 1.49872100  | 0.11263800  | 1.30889200  | H          | -4.04352800 | 2.88204800  | 7.90592400  |
| H                         | -0.02111400 | 0.35981800  | 0.43669400  | H          | -3.08024800 | 4.03943200  | 8.82520500  |
| C                         | 0.53904900  | -0.43856600 | 3.76012000  | H          | -3.53686000 | 4.40046000  | 7.15447800  |
| H                         | 0.56121600  | 0.57679500  | 4.15866600  | C          | -1.15490800 | 1.42989000  | 8.50624900  |
| H                         | 0.11892600  | -1.10130600 | 4.52528000  | H          | -0.98383700 | 1.87069000  | 9.49589300  |
| H                         | 1.57145500  | -0.76003700 | 3.58104800  | H          | -1.95551300 | 0.68858700  | 8.61925400  |
| C                         | -0.24708900 | -0.52140900 | 2.43986500  | H          | -0.24586200 | 0.89180800  | 8.21710200  |
| C                         | -0.18291500 | -1.99527200 | 1.96820600  | C          | -0.22182700 | 4.02660800  | 6.95813100  |
| H                         | -0.64579000 | -2.13874600 | 0.99276000  | C          | 0.08701200  | 4.76787000  | 8.27744100  |
| H                         | 0.86711200  | -2.30199700 | 1.89081800  | H          | 0.41859400  | 4.08293500  | 9.06770200  |
| H                         | -0.66924800 | -2.65554400 | 2.69672100  | H          | 0.89331200  | 5.49876600  | 8.12279200  |
| <b>TS-2<sub>1g'</sub></b> |             |             |             | H          | -0.78280500 | 5.31999900  | 8.65439400  |
| O                         | -2.42208200 | -0.90498000 | -0.42336000 | C          | 1.05380200  | 3.30673500  | 6.46994300  |
| C                         | -1.59541200 | -1.04105100 | 0.66134300  | H          | 0.88367200  | 2.77856300  | 5.52529600  |
| O                         | -0.52094000 | -1.58410000 | 0.52934400  | H          | 1.86021900  | 4.03510500  | 6.30241800  |
| C                         | -3.62098300 | -0.20631900 | -0.07388300 | H          | 1.42206600  | 2.57789300  | 7.20229800  |
| H                         | -3.70331500 | 0.69000000  | -0.70044200 | C          | -0.65824200 | 5.05033600  | 5.88769500  |
| H                         | -4.48385700 | -0.85079700 | -0.28190900 | H          | 0.15080600  | 5.77001900  | 5.69690100  |
| C                         | -3.47909100 | 0.11490000  | 1.38519900  | H          | -0.89986300 | 4.56144600  | 4.93755300  |
| C                         | -4.41175900 | 0.80410200  | 2.19464900  | H          | -1.53641000 | 5.62670100  | 6.20405000  |
| C                         | -3.83831400 | 0.91493400  | 3.35807300  | C          | 0.72823800  | -0.29369700 | 3.11210100  |
| C                         | -2.68352900 | 0.48480600  | 4.00199400  | H          | 0.76382900  | 0.77994400  | 3.33231100  |
| C                         | -2.84290300 | 1.09290200  | 5.39893100  | H          | 1.63520300  | -0.75281000 | 3.52495300  |
| H                         | -2.93855700 | 0.34607800  | 6.19664100  | H          | 0.73900000  | -0.43709700 | 2.03102200  |
| C                         | -4.18402400 | 1.78441100  | 5.05926200  | C          | -0.39883100 | -0.77219100 | 5.28648300  |
| H                         | -4.08054600 | 2.83878300  | 4.81186400  | H          | -0.33737800 | 0.27636400  | 5.58221600  |
| C                         | -5.44542200 | 1.23878600  | 5.13238200  | H          | -1.23940100 | -1.23937500 | 5.81402600  |
| C                         | -5.73305000 | -0.14683300 | 5.63231300  | H          | 0.51458200  | -1.27366400 | 5.62540700  |
| H                         | -6.52755600 | -0.10771800 | 6.38853100  | C          | -0.52025800 | -0.93938500 | 3.75901100  |
| H                         | -6.11136600 | -0.76720300 | 4.80848500  | C          | -0.55333000 | -2.46383400 | 3.48547200  |
| H                         | -4.86425900 | -0.64534300 | 6.06619300  | H          | -0.55636200 | -2.69167200 | 2.42070900  |
| C                         | -6.56113800 | 1.93740100  | 4.43237800  | H          | 0.33698300  | -2.92809400 | 3.92711300  |
| H                         | -6.47095800 | 1.64543000  | 3.36146300  | H          | -1.43404000 | -2.92080600 | 3.95345700  |
| H                         | -7.54675100 | 1.62884100  | 4.79264000  | <b>2g'</b> |             |             |             |
| H                         | -6.47601700 | 3.02705100  | 4.47747700  | O          | -2.40885000 | -1.10921900 | -0.43514800 |
| C                         | -2.25437300 | -0.41126500 | 1.84888300  | C          | -1.55738700 | -1.18677600 | 0.63997000  |
| C                         | -1.80226900 | -0.27951800 | 3.20836900  | O          | -0.48456000 | -1.72986200 | 0.51671700  |
| O                         | -1.85362000 | 2.04704200  | 5.72735400  | C          | -3.60156200 | -0.40064300 | -0.09700200 |

|    |             |             |             |   |             |             |            |
|----|-------------|-------------|-------------|---|-------------|-------------|------------|
| H  | -3.69895500 | 0.46165300  | -0.76796400 | H | 0.19145300  | 5.75516200  | 5.73218400 |
| H  | -4.46252900 | -1.06085600 | -0.26050500 | H | -0.83637600 | 4.56489100  | 4.91300800 |
| C  | -3.42949300 | -0.00838000 | 1.34206700  | H | -1.52885800 | 5.65450600  | 6.12744000 |
| C  | -4.31173500 | 0.73290200  | 2.12628500  | C | 0.78530200  | -0.29758900 | 3.03188400 |
| C  | -3.84000200 | 0.97384000  | 3.40395500  | H | 0.80964000  | 0.78536000  | 3.20210500 |
| C  | -2.62241500 | 0.48241600  | 3.89196100  | H | 1.70086400  | -0.72566700 | 3.45818500 |
| C  | -2.85924600 | 1.11592100  | 5.27625400  | H | 0.79099300  | -0.49019300 | 1.95828900 |
| H  | -3.01214800 | 0.38589100  | 6.08151700  | C | -0.32870700 | -0.67186700 | 5.23529000 |
| C  | -4.22877400 | 1.68965200  | 4.68842500  | H | -0.30338900 | 0.39364400  | 5.47091200 |
| H  | -4.15100200 | 2.77830100  | 4.59697400  | H | -1.15452000 | -1.13200100 | 5.79063000 |
| C  | -5.53489600 | 1.31944000  | 5.35110200  | H | 0.60075400  | -1.12423800 | 5.59890300 |
| C  | -5.84112800 | -0.14917600 | 5.52860100  | C | -0.44903400 | -0.92886300 | 3.72050000 |
| H  | -5.08468600 | -0.65028100 | 6.14680600  | C | -0.45654900 | -2.46577500 | 3.52684800 |
| H  | -6.81398700 | -0.29607100 | 6.00650600  | H | -0.45234100 | -2.75164000 | 2.47572500 |
| H  | -5.84968100 | -0.67213600 | 4.56411600  | H | 0.43951500  | -2.89083500 | 3.99494700 |
| C  | -6.39307800 | 2.26857500  | 5.74539100  | H | -1.33055100 | -2.91269500 | 4.01650900 |
| H  | -5.26378400 | 1.09950500  | 1.75154900  |   |             |             |            |
| H  | -7.34019300 | 2.02183900  | 6.21894900  |   |             |             |            |
| H  | -6.18153900 | 3.32547400  | 5.60451200  |   |             |             |            |
| C  | -2.20009500 | -0.50504900 | 1.80803600  |   |             |             |            |
| C  | -1.73876800 | -0.31316700 | 3.14794900  |   |             |             |            |
| O  | -1.92989900 | 2.10214900  | 5.65452200  |   |             |             |            |
| Si | -1.75792400 | 2.80192500  | 7.18427700  |   |             |             |            |
| C  | -3.34766600 | 3.69184300  | 7.68849200  |   |             |             |            |
| H  | -4.20972300 | 3.01552300  | 7.65925200  |   |             |             |            |
| H  | -3.27046900 | 4.08387500  | 8.70998600  |   |             |             |            |
| H  | -3.56999700 | 4.53516100  | 7.02471600  |   |             |             |            |
| C  | -1.38286800 | 1.45657600  | 8.46013100  |   |             |             |            |
| H  | -1.23780300 | 1.89261800  | 9.45601500  |   |             |             |            |
| H  | -2.21055500 | 0.74133000  | 8.54138100  |   |             |             |            |
| H  | -0.47989600 | 0.89024300  | 8.20765700  |   |             |             |            |
| C  | -0.30542100 | 4.02955700  | 6.97616000  |   |             |             |            |
| C  | -0.06450900 | 4.77429600  | 8.30764200  |   |             |             |            |
| H  | 0.20275300  | 4.08849100  | 9.12129600  |   |             |             |            |
| H  | 0.76496900  | 5.48785800  | 8.20033300  |   |             |             |            |
| H  | -0.94486000 | 5.34601800  | 8.62600700  |   |             |             |            |
| C  | 0.98265100  | 3.27825000  | 6.57739800  |   |             |             |            |
| H  | 0.86499400  | 2.75086100  | 5.62420800  |   |             |             |            |
| H  | 1.81639100  | 3.98622100  | 6.46328500  |   |             |             |            |
| H  | 1.28252100  | 2.54322300  | 7.33453600  |   |             |             |            |
| C  | -0.64539900 | 5.05576500  | 5.87357400  |   |             |             |            |
